# Supplementary material for: Transcriptome Analysis of the Japanese Pine Sawyer Beetle, Monochamus alternatus, Infected with the Entomopathogenic Fungus Metarhizium anisopliae JEF-197
Source: MDPI journal article supplement (doi:10.3390/jof7050373), 2021-05-10
Supplement: s1 [file s1]

**Supplementary Table S3. *in silico* cDNA library of assembled *M. anisopliae* JEF-197 and Japanese pine sawyer**

|                                  | <i>M. anisopliae</i> JEF-197 | Japanese pine sawyer |
|----------------------------------|------------------------------|----------------------|
| Total length of transcripts (bp) | 38,664,210                   | 71,371,911           |
| Total number of transcripts      | 35,334                       | 52,306               |
| Total number of genes            | 9,286                        | 19,046               |
| N50 of genes (bp)                | 1,500                        | 2,007                |
| GC %                             | 54.19                        | 41.74                |
