# Supplementary material for: Transcriptome Analysis of the Japanese Pine Sawyer Beetle, Monochamus alternatus, Infected with the Entomopathogenic Fungus Metarhizium anisopliae JEF-197
Source: MDPI journal article supplement (doi:10.3390/jof7050373), 2021-05-10
Supplement: s1 [file s1]

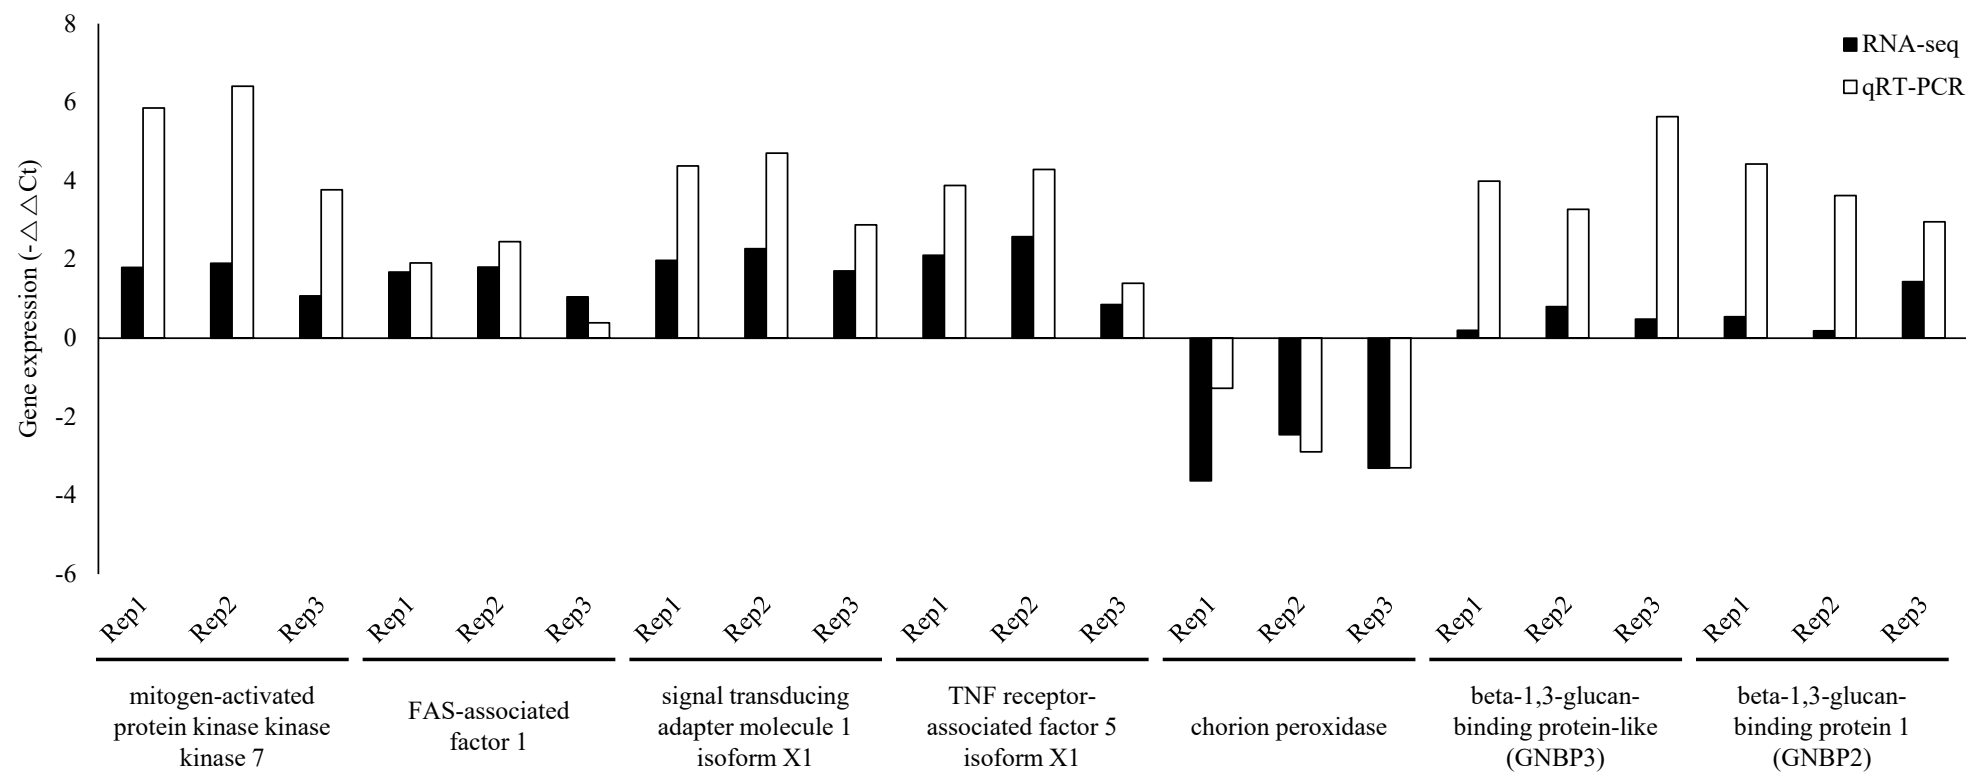

**Supplementary Figure S2. Validation using qRT-PCR for the expression level of the selected seven genes by RNA-seq analysis.** The *actin* gene (JPS\_TRINITY\_DN629\_c0\_g1) was used as internal control of Japanese pine sawyer. The average results of three replicates RNA samples of the non-treated control Japanese pine sawyer were compared with each results of the fungus-treated JPS. The Rep is replicates of fungus-treated JPS beetle.
