# Supplementary material for: Transcriptome Analysis of the Japanese Pine Sawyer Beetle, Monochamus alternatus, Infected with the Entomopathogenic Fungus Metarhizium anisopliae JEF-197
Source: MDPI journal article supplement (doi:10.3390/jof7050373), 2021-05-10
Supplement: s1 [file s1]

**Supplementary Table S6. DEGs of Japanese pine sawyer treated with *Metarhizium anisopliae* JEF-197 annotated in the IMD and Toll pathway**

| Pathway                              | Name          | Definition                                                      | KO entry | Contigs                    |
|--------------------------------------|---------------|-----------------------------------------------------------------|----------|----------------------------|
| IMD pathway                          | PGRP-LC       | peptidoglycan recognition protein LC                            | K24075   | JPS_TRINITY_DN9_c0_g2      |
|                                      | IMD           | immune deficiency                                               | K20699   | JPS_TRINITY_DN143931_c0_g1 |
|                                      | ANK           | ankyrin                                                         | K10380   | JPS_TRINITY_DN588_c0_g1    |
|                                      | DUOX          | dual oxidase [EC:1.6.3.1 1.11.1.-]                              | K13411   | JPS_TRINITY_DN1347_c0_g1   |
|                                      | MAP3K7        | mitogen-activated protein kinase kinase kinase 7 [EC:2.7.11.25] | K04427   | JPS_TRINITY_DN3275_c0_g1   |
|                                      | PGRP          | peptidoglycan recognition protein                               | K01446   | JPS_TRINITY_DN6549_c1_g2   |
|                                      | CASP8 (Dredd) | caspase 8 [EC:3.4.22.61]                                        | K04398   | JPS_TRINITY_DN5698_c0_g1   |
| Toll pathway                         | GGBP3         | gram-negative bacteria-binding protein 3                        | K20692   | JPS_TRINITY_DN2475_c0_g2   |
|                                      | MODSP         | modular serine protease [EC:3.4.21.-]                           | K20674   | JPS_TRINITY_DN2050_c0_g1   |
|                                      | SPZ           | protein spaetzle                                                | K20694   | JPS_TRINITY_DN5430_c0_g1   |
|                                      | NFKBIA        | NF-kappa-B inhibitor alpha                                      | K04734   | JPS_TRINITY_DN3708_c0_g1   |
| Toll-like receptor signaling pathway | CASP8         | caspase 8 [EC:3.4.22.61]                                        | K04398   | JPS_TRINITY_DN5698_c0_g1   |
|                                      | TBK1          | TANK-binding kinase 1 [EC:2.7.11.10]                            | K05410   | JPS_TRINITY_DN6262_c0_g1   |
|                                      | MAP3K7        | mitogen-activated protein kinase kinase kinase 7 [EC:2.7.11.25] | K04427   | JPS_TRINITY_DN3275_c0_g1   |
|                                      | NFKBIA        | caspase 8 [EC:3.4.22.61]                                        | K04398   | JPS_TRINITY_DN3708_c0_g1   |
