# Supplementary material for: Transcriptome Analysis of the Japanese Pine Sawyer Beetle, Monochamus alternatus, Infected with the Entomopathogenic Fungus Metarhizium anisopliae JEF-197
Source: MDPI journal article supplement (doi:10.3390/jof7050373), 2021-05-10
Supplement: s1 [file s1]

(a) *Metarhizium anisopliae* JEF-197

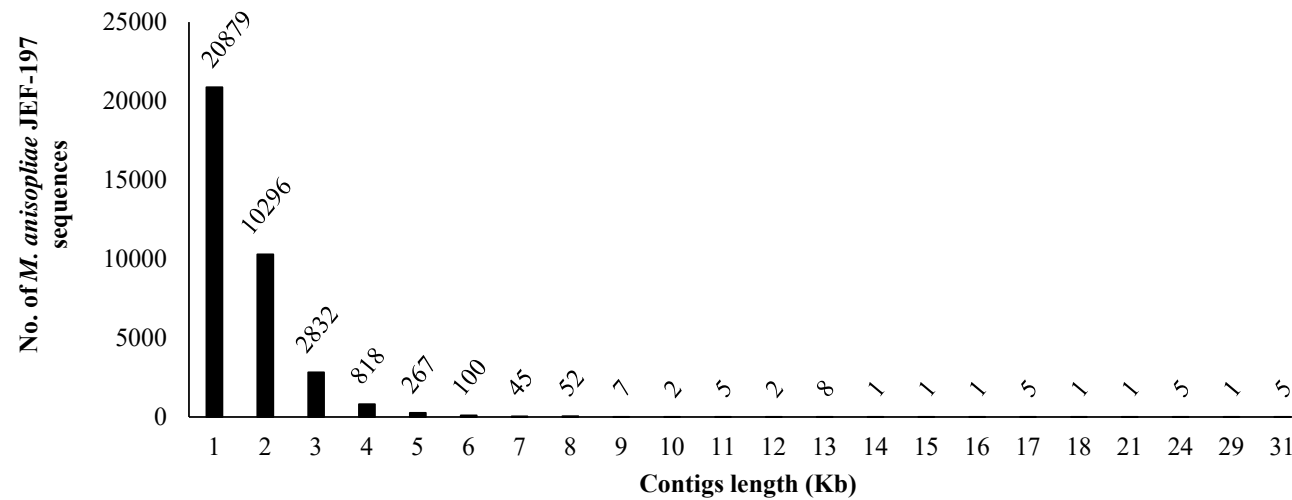

(b) Japanese pine sawyer beetle

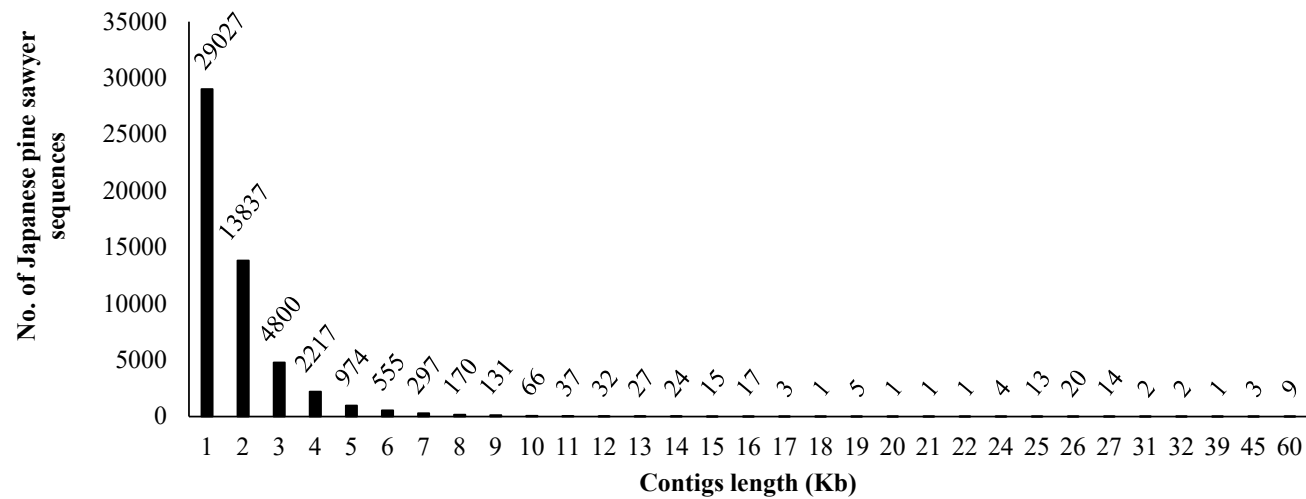

**Supplementary Figure S1. Distribution of the assembled Japanese pine sawyer beetle transcripts according to length of contig** The number of contigs was counted between the corresponding 1 kb size criteria. (a), The contigs of *Metarhizium anisopliae* JEF-197; (b), The contigs of JPS beetle
