# Supplementary material for: Transcriptome Analysis of the Japanese Pine Sawyer Beetle, Monochamus alternatus, Infected with the Entomopathogenic Fungus Metarhizium anisopliae JEF-197
Source: MDPI journal article supplement (doi:10.3390/jof7050373), 2021-05-10
Supplement: s1 [file s1]

Supplementary Table S2. Summary of obtained read of non-treated control and fungus-treated Japanese pine sawyer adults by Illumina sequencing

| Treatment                 | <i>M. anisopliae</i> JEF-197 |               |               | Non-treated control JPS |               |               | Fungus-treated JPS |               |               |
|---------------------------|------------------------------|---------------|---------------|-------------------------|---------------|---------------|--------------------|---------------|---------------|
| Replication               | 1                            | 2             | 3             | 1                       | 2             | 3             | 1                  | 2             | 3             |
| Total number of sequences | 15,158,641                   | 16,588,362    | 24,069,114    | 18,329,493              | 17,487,218    | 15,268,480    | 15,390,184         | 15,487,044    | 19,539,689    |
| Total length (bp)         | 3,062,045,482                | 3,350,849,124 | 4,861,961,028 | 3,702,557,586           | 3,532,418,036 | 3,084,232,960 | 3,108,817,168      | 3,128,382,888 | 3,947,017,178 |
| GC%                       | 53                           | 52            | 52            | 51                      | 43            | 49            | 44                 | 43            | 44            |
