# Supplementary material for: Transcriptome Analysis of the Japanese Pine Sawyer Beetle, Monochamus alternatus, Infected with the Entomopathogenic Fungus Metarhizium anisopliae JEF-197
Source: MDPI journal article supplement (doi:10.3390/jof7050373), 2021-05-10
Supplement: s1 [file s1]

**Supplementary Table S1. A list of primers used in qRT-PCR to validate the data of RNA-seq analysis and immune-related gene expression in *Metarhizium anisopliae* JEF-197-treated Japanese pine sawyer beetle adult**

| Transcripts              | Gene                                                                                           | Amplicon size (bp) |   | Primer (5' → 3')           |
|--------------------------|------------------------------------------------------------------------------------------------|--------------------|---|----------------------------|
| TRINITY_DN629_c0_g1_i5   | Actin-87E-like Protein, actin, muscle (internal control)                                       | 196                | F | TGC GAC GTT GAT ATC CGT AA |
|                          |                                                                                                |                    | R | AGA GGG AAG CCA AGA TGG AT |
| TRINITY_DN3896_c0_g1_i4  | inhibitor of nuclear factor kappa-B kinase subunit alpha-like isoform X1 (IMD pathway members) | 224                | F | CGA AAA ATG CTT CCG GAT TA |
|                          |                                                                                                |                    | R | ACC CAC AAA GCT CAC TAC CG |
| TRINITY_DN3275_c0_g1_i2  | mitogen-activated protein kinase kinase kinase 7 (IMD pathway members)                         | 174                | F | GCT AAT GCT TGG GAT TTG GA |
|                          |                                                                                                |                    | R | ATC CAG GGA CTC TAG CAG CA |
| TRINITY_DN5026_c0_g1_i2  | tyrosine-protein kinase hopscotch (JAK/STAT pathway members)                                   | 165                | F | CAG CAG CTT TGT GGC ACT TA |
|                          |                                                                                                |                    | R | CCA CTG GGA TCC AAT GTA CC |
| TRINITY_DN1489_c0_g1_i3  | cytokine receptor (JAK/STAT pathway members)                                                   | 241                | F | TGA AGT CAG TTG GCA AGC AC |
|                          |                                                                                                |                    | R | ACA TTC AGC CCA AAA CAT CC |
| TRINITY_DN191_c0_g2_i6   | signal transducer and activator of transcription 5B isoform X1 (JAK/STAT pathway members)      | 193                | F | AAT ACC AAC AGG CGA CAA GG |
|                          |                                                                                                |                    | R | ACC ACG ACG GGT AAA CTC AG |
| TRINITY_DN5529_c0_g1_i1  | toll-like receptor 7 (Toll-like receptors)                                                     | 241                | F | CGT AAT CTC CGT GTC CGA TT |
|                          |                                                                                                |                    | R | CAC CAC CCA TTC TTC GTC TT |
| TRINITY_DN61089_c0_g1_i1 | toll-like receptor Tollo (Toll-like receptors)                                                 | 209                | F | TGC CGT GCT AGA TTC TTC CT |
|                          |                                                                                                |                    | R | GTA TGA CTT GGC GCT GGA TT |
| TRINITY_DN7214_c0_g1_i1  | beta-1,3-glucan-binding protein (GNBP1)                                                        | 157                | F | AGA AGG TGG CTT TTG GGA AT |
|                          |                                                                                                |                    | R | AGC ATC ATC GGG GAA GTA TG |
| TRINITY_DN8099_c1_g1_i2  | beta-1,3-glucan-binding protein-like (GNBP3)                                                   | 211                | F | TGA TAT TTA GCG AGA GTT TT |
|                          |                                                                                                |                    | R | TTG GCG ACA TTA CAA ATC CA |
| TRINITY_DN7462_c0_g1_i1  | beta-1,3-glucan-binding protein 1 (GNBP2)                                                      | 197                | F | GCC TGG AGA TTT CAG TGG AG |
|                          |                                                                                                |                    | R | CCT CAC AAC CTG TTC CTG GT |
