# Supplementary material for: Transcriptome Analysis of the Japanese Pine Sawyer Beetle, Monochamus alternatus, Infected with the Entomopathogenic Fungus Metarhizium anisopliae JEF-197
Source: J Fungi (Basel). 2021 May 10;7(5):373. doi: 10.3390/jof7050373 (PMC8151162; doi:10.3390/jof7050373)
Supplement: Supplementary file 1 [file jof-07-00373-s001.zip › Supplementary Table S4.xlsx]

## Sheet: Supplement Table S4
Supplementary Table S4. KEGG pathway annotation by up- and down-regulated unigenes of Metarhizium anisopliae JEF-197-treated Japanese pine sawyer
Up-regulation				Down-regulation
KEEG id	Pathways	Seq#		KEEG id	Pathways	Seq#
03040	Spliceosome	13		04361	Axon regeneration	13
03013	RNA transport	13		05165	Human papillomavirus infection	13
05022	Pathways of neurodegeneration - multiple diseases	12		05200	Pathways in cancer	12
05014	Amyotrophic lateral sclerosis	11		04310	Wnt signaling pathway	9
04624	Toll and Imd signaling pathway	10		04360	Axon guidance	9
05131	Shigellosis	10		04010	MAPK signaling pathway	8
03010	Ribosome	9		04391	Hippo signaling pathway - fly	8
03008	Ribosome biogenesis in eukaryotes	9		05022	Pathways of neurodegeneration - multiple diseases	8
04151	PI3K-Akt signaling pathway	9		04390	Hippo signaling pathway	7
04144	Endocytosis	9		04550	Signaling pathways regulating pluripotency of stem cells	7
05016	Huntington disease	9		05205	Proteoglycans in cancer	7
05169	Epstein-Barr virus infection	8		05010	Alzheimer disease	7
05165	Human papillomavirus infection	8		04150	mTOR signaling pathway	6
04217	Necroptosis	7		04910	Insulin signaling pathway	6
04510	Focal adhesion	7		05203	Viral carcinogenesis	6
05200	Pathways in cancer	7		05225	Hepatocellular carcinoma	6
05166	Human T-cell leukemia virus 1 infection	7		05217	Basal cell carcinoma	6
04010	MAPK signaling pathway	6		05224	Breast cancer	6
04140	Autophagy - animal	6		05012	Parkinson disease	6
05203	Viral carcinogenesis	6		05020	Prion disease	6
05010	Alzheimer disease	6		05034	Alcoholism	6
05017	Spinocerebellar ataxia	6		05131	Shigellosis	6
05020	Prion disease	6		04120	Ubiquitin mediated proteolysis	5
05132	Salmonella infection	6		04350	TGF-beta signaling pathway	5
05135	Yersinia infection	6		04024	cAMP signaling pathway	5
00230	Purine metabolism	5		04142	Lysosome	5
04120	Ubiquitin mediated proteolysis	5		04530	Tight junction	5
03420	Nucleotide excision repair	5		04914	Progesterone-mediated oocyte maturation	5
04014	Ras signaling pathway	5		04916	Melanogenesis	5
04015	Rap1 signaling pathway	5		04722	Neurotrophin signaling pathway	5
04621	NOD-like receptor signaling pathway	5		05202	Transcriptional misregulation in cancer	5
04714	Thermogenesis	5		05226	Gastric cancer	5
05168	Herpes simplex virus 1 infection	5		04931	Insulin resistance	5
05167	Kaposi sarcoma-associated herpesvirus infection	5		04934	Cushing syndrome	5
00670	One carbon pool by folate	4		05132	Salmonella infection	5
03020	RNA polymerase	4		05166	Human T-cell leukemia virus 1 infection	5
03022	Basal transcription factors	4		01522	Endocrine resistance	5
00970	Aminoacyl-tRNA biosynthesis	4		00230	Purine metabolism	4
04141	Protein processing in endoplasmic reticulum	4		04013	MAPK signaling pathway - fly	4
03030	DNA replication	4		04340	Hedgehog signaling pathway	4
03440	Homologous recombination	4		04068	FoxO signaling pathway	4
04013	MAPK signaling pathway - fly	4		04020	Calcium signaling pathway	4
04512	ECM-receptor interaction	4		04152	AMPK signaling pathway	4
04110	Cell cycle	4		04080	Neuroactive ligand-receptor interaction	4
04218	Cellular senescence	4		04140	Autophagy - animal	4
04622	RIG-I-like receptor signaling pathway	4		04217	Necroptosis	4
04623	Cytosolic DNA-sensing pathway	4		04218	Cellular senescence	4
05202	Transcriptional misregulation in cancer	4		04935	Growth hormone synthesis, secretion and action	4
05205	Proteoglycans in cancer	4		04919	Thyroid hormone signaling pathway	4
05012	Parkinson disease	4		04211	Longevity regulating pathway	4
05130	Pathogenic Escherichia coli infection	4		04212	Longevity regulating pathway - worm	4
05100	Bacterial invasion of epithelial cells	4		04213	Longevity regulating pathway - multiple species	4
05170	Human immunodeficiency virus 1 infection	4		04714	Thermogenesis	4
05161	Hepatitis B	4		05206	MicroRNAs in cancer	4
05171	Coronavirus disease - COVID-19	4		05322	Systemic lupus erythematosus	4
05162	Measles	4		05418	Fluid shear stress and atherosclerosis	4
05163	Human cytomegalovirus infection	4		05171	Coronavirus disease - COVID-19	4
05145	Toxoplasmosis	4		05167	Kaposi sarcoma-associated herpesvirus infection	4
01523	Antifolate resistance	4		00561	Glycerolipid metabolism	3
00250	Alanine, aspartate and glutamate metabolism	3		00600	Sphingolipid metabolism	3
00260	Glycine, serine and threonine metabolism	3		04141	Protein processing in endoplasmic reticulum	3
00270	Cysteine and methionine metabolism	3		04014	Ras signaling pathway	3
00130	Ubiquinone and other terpenoid-quinone biosynthesis	3		04330	Notch signaling pathway	3
03015	mRNA surveillance pathway	3		04341	Hedgehog signaling pathway - fly	3
04130	SNARE interactions in vesicular transport	3		04071	Sphingolipid signaling pathway	3
03050	Proteasome	3		04022	cGMP-PKG signaling pathway	3
03018	RNA degradation	3		04151	PI3K-Akt signaling pathway	3
03430	Mismatch repair	3		04137	Mitophagy - animal	3
04064	NF-kappa B signaling pathway	3		04114	Oocyte meiosis	3
04668	TNF signaling pathway	3		04210	Apoptosis	3
04070	Phosphatidylinositol signaling system	3		04215	Apoptosis - multiple species	3
04024	cAMP signaling pathway	3		04510	Focal adhesion	3
04514	Cell adhesion molecules	3		04062	Chemokine signaling pathway	3
04111	Cell cycle - yeast	3		04912	GnRH signaling pathway	3
04113	Meiosis - yeast	3		04924	Renin secretion	3
04114	Oocyte meiosis	3		04970	Salivary secretion	3
04210	Apoptosis	3		04972	Pancreatic secretion	3
04115	p53 signaling pathway	3		04974	Protein digestion and absorption	3
04810	Regulation of actin cytoskeleton	3		04975	Fat digestion and absorption	3
04620	Toll-like receptor signaling pathway	3		05231	Choline metabolism in cancer	3
04657	IL-17 signaling pathway	3		05210	Colorectal cancer	3
04062	Chemokine signaling pathway	3		05213	Endometrial cancer	3
04915	Estrogen signaling pathway	3		05014	Amyotrophic lateral sclerosis	3
04914	Progesterone-mediated oocyte maturation	3		05016	Huntington disease	3
04926	Relaxin signaling pathway	3		04932	Non-alcoholic fatty liver disease	3
04360	Axon guidance	3		05130	Pathogenic Escherichia coli infection	3
05222	Small cell lung cancer	3		05135	Yersinia infection	3
05134	Legionellosis	3		05152	Tuberculosis	3
05160	Hepatitis C	3		05170	Human immunodeficiency virus 1 infection	3
05164	Influenza A	3		05161	Hepatitis B	3
00520	Amino sugar and nucleotide sugar metabolism	2		05163	Human cytomegalovirus infection	3
00630	Glyoxylate and dicarboxylate metabolism	2		05169	Epstein-Barr virus infection	3
00562	Inositol phosphate metabolism	2		00030	Pentose phosphate pathway	2
00680	Methane metabolism	2		00040	Pentose and glucuronate interconversions	2
00564	Glycerophospholipid metabolism	2		00053	Ascorbate and aldarate metabolism	2
00513	Various types of N-glycan biosynthesis	2		00062	Fatty acid elongation	2
00511	Other glycan degradation	2		00564	Glycerophospholipid metabolism	2
00983	Drug metabolism - other enzymes	2		01040	Biosynthesis of unsaturated fatty acids	2
03060	Protein export	2		00330	Arginine and proline metabolism	2
03410	Base excision repair	2		00510	N-Glycan biosynthesis	2
03450	Non-homologous end-joining	2		00513	Various types of N-glycan biosynthesis	2
03460	Fanconi anemia pathway	2		00511	Other glycan degradation	2
04310	Wnt signaling pathway	2		00860	Porphyrin and chlorophyll metabolism	2
04066	HIF-1 signaling pathway	2		00983	Drug metabolism - other enzymes	2
04068	FoxO signaling pathway	2		03010	Ribosome	2
04022	cGMP-PKG signaling pathway	2		04012	ErbB signaling pathway	2
04145	Phagosome	2		04060	Cytokine-cytokine receptor interaction	2
04138	Autophagy - yeast	2		04514	Cell adhesion molecules	2
04136	Autophagy - other	2		04144	Endocytosis	2
04137	Mitophagy - animal	2		04145	Phagosome	2
04214	Apoptosis - fly	2		04138	Autophagy - yeast	2
04530	Tight junction	2		04110	Cell cycle	2
04611	Platelet activation	2		04111	Cell cycle - yeast	2
04625	C-type lectin receptor signaling pathway	2		04214	Apoptosis - fly	2
04612	Antigen processing and presentation	2		04115	p53 signaling pathway	2
04660	T cell receptor signaling pathway	2		04520	Adherens junction	2
04658	Th1 and Th2 cell differentiation	2		04540	Gap junction	2
04659	Th17 cell differentiation	2		04611	Platelet activation	2
04670	Leukocyte transendothelial migration	2		04621	NOD-like receptor signaling pathway	2
04911	Insulin secretion	2		04658	Th1 and Th2 cell differentiation	2
04910	Insulin signaling pathway	2		04911	Insulin secretion	2
04935	Growth hormone synthesis, secretion and action	2		04923	Regulation of lipolysis in adipocytes	2
04918	Thyroid hormone synthesis	2		04920	Adipocytokine signaling pathway	2
04919	Thyroid hormone signaling pathway	2		04917	Prolactin signaling pathway	2
04928	Parathyroid hormone synthesis, secretion and action	2		04926	Relaxin signaling pathway	2
04962	Vasopressin-regulated water reabsorption	2		04928	Parathyroid hormone synthesis, secretion and action	2
04722	Neurotrophin signaling pathway	2		04270	Vascular smooth muscle contraction	2
04213	Longevity regulating pathway - multiple species	2		04976	Bile secretion	2
05231	Choline metabolism in cancer	2		04979	Cholesterol metabolism	2
05235	PD-L1 expression and PD-1 checkpoint pathway in cancer	2		04977	Vitamin digestion and absorption	2
05225	Hepatocellular carcinoma	2		04728	Dopaminergic synapse	2
05214	Glioma	2		04726	Serotonergic synapse	2
05220	Chronic myeloid leukemia	2		04720	Long-term potentiation	2
05215	Prostate cancer	2		04723	Retrograde endocannabinoid signaling	2
05223	Non-small cell lung cancer	2		04742	Taste transduction	2
05031	Amphetamine addiction	2		04750	Inflammatory mediator regulation of TRP channels	2
05410	Hypertrophic cardiomyopathy	2		04320	Dorso-ventral axis formation	2
05412	Arrhythmogenic right ventricular cardiomyopathy	2		04713	Circadian entrainment	2
05414	Dilated cardiomyopathy	2		05212	Pancreatic cancer	2
04931	Insulin resistance	2		05216	Thyroid cancer	2
04933	AGE-RAGE signaling pathway in diabetic complications	2		05221	Acute myeloid leukemia	2
05120	Epithelial cell signaling in Helicobacter pylori infection	2		05222	Small cell lung cancer	2
05152	Tuberculosis	2		05223	Non-small cell lung cancer	2
05140	Leishmaniasis	2		05017	Spinocerebellar ataxia	2
05142	Chagas disease	2		05032	Morphine addiction	2
01524	Platinum drug resistance	2		04930	Type II diabetes mellitus	2
00500	Starch and sucrose metabolism	1		04933	AGE-RAGE signaling pathway in diabetic complications	2
00620	Pyruvate metabolism	1		05110	Vibrio cholerae infection	2
00640	Propanoate metabolism	1		05120	Epithelial cell signaling in Helicobacter pylori infection	2
00650	Butanoate metabolism	1		05164	Influenza A	2
00720	Carbon fixation pathways in prokaryotes	1		05162	Measles	2
00920	Sulfur metabolism	1		05168	Herpes simplex virus 1 infection	2
00061	Fatty acid biosynthesis	1		05146	Amoebiasis	2
00071	Fatty acid degradation	1		05142	Chagas disease	2
00561	Glycerolipid metabolism	1		01521	EGFR tyrosine kinase inhibitor resistance	2
00240	Pyrimidine metabolism	1		00520	Amino sugar and nucleotide sugar metabolism	1
00280	Valine, leucine and isoleucine degradation	1		00650	Butanoate metabolism	1
00310	Lysine degradation	1		00562	Inositol phosphate metabolism	1
00220	Arginine biosynthesis	1		00190	Oxidative phosphorylation	1
00350	Tyrosine metabolism	1		00910	Nitrogen metabolism	1
00360	Phenylalanine metabolism	1		00061	Fatty acid biosynthesis	1
00380	Tryptophan metabolism	1		00072	Synthesis and degradation of ketone bodies	1
00410	beta-Alanine metabolism	1		00073	Cutin, suberine and wax biosynthesis	1
00460	Cyanoamino acid metabolism	1		00100	Steroid biosynthesis	1
00480	Glutathione metabolism	1		00140	Steroid hormone biosynthesis	1
00514	Other types of O-glycan biosynthesis	1		00565	Ether lipid metabolism	1
00532	Glycosaminoglycan biosynthesis - chondroitin sulfate / dermatan sulfate	1		00240	Pyrimidine metabolism	1
00531	Glycosaminoglycan degradation	1		00250	Alanine, aspartate and glutamate metabolism	1
00563	Glycosylphosphatidylinositol (GPI)-anchor biosynthesis	1		00260	Glycine, serine and threonine metabolism	1
00603	Glycosphingolipid biosynthesis - globo and isoglobo series	1		00270	Cysteine and methionine metabolism	1
00604	Glycosphingolipid biosynthesis - ganglio series	1		00310	Lysine degradation	1
00760	Nicotinate and nicotinamide metabolism	1		00410	beta-Alanine metabolism	1
00790	Folate biosynthesis	1		00480	Glutathione metabolism	1
00830	Retinol metabolism	1		00514	Other types of O-glycan biosynthesis	1
00940	Phenylpropanoid biosynthesis	1		00563	Glycosylphosphatidylinositol (GPI)-anchor biosynthesis	1
00232	Caffeine metabolism	1		00770	Pantothenate and CoA biosynthesis	1
00362	Benzoate degradation	1		00830	Retinol metabolism	1
02020	Two-component system	1		00981	Insect hormone biosynthesis	1
04011	MAPK signaling pathway - yeast	1		00930	Caprolactam degradation	1
04012	ErbB signaling pathway	1		00980	Metabolism of xenobiotics by cytochrome P450	1
04340	Hedgehog signaling pathway	1		00982	Drug metabolism - cytochrome P450	1
04350	TGF-beta signaling pathway	1		03015	mRNA surveillance pathway	1
04390	Hippo signaling pathway	1		03018	RNA degradation	1
04391	Hippo signaling pathway - fly	1		02010	ABC transporters	1
04370	VEGF signaling pathway	1		04015	Rap1 signaling pathway	1
04371	Apelin signaling pathway	1		04392	Hippo signaling pathway - multiple species	1
04630	JAK-STAT signaling pathway	1		04370	VEGF signaling pathway	1
04020	Calcium signaling pathway	1		04371	Apelin signaling pathway	1
04072	Phospholipase D signaling pathway	1		04668	TNF signaling pathway	1
04152	AMPK signaling pathway	1		04066	HIF-1 signaling pathway	1
04150	mTOR signaling pathway	1		04070	Phosphatidylinositol signaling system	1
04080	Neuroactive ligand-receptor interaction	1		04072	Phospholipase D signaling pathway	1
04060	Cytokine-cytokine receptor interaction	1		04146	Peroxisome	1
04142	Lysosome	1		04113	Meiosis - yeast	1
04146	Peroxisome	1		04216	Ferroptosis	1
04139	Mitophagy - yeast	1		04810	Regulation of actin cytoskeleton	1
04215	Apoptosis - multiple species	1		04620	Toll-like receptor signaling pathway	1
04216	Ferroptosis	1		04624	Toll and Imd signaling pathway	1
04550	Signaling pathways regulating pluripotency of stem cells	1		04622	RIG-I-like receptor signaling pathway	1
04610	Complement and coagulation cascades	1		04625	C-type lectin receptor signaling pathway	1
04650	Natural killer cell mediated cytotoxicity	1		04660	T cell receptor signaling pathway	1
04662	B cell receptor signaling pathway	1		04659	Th17 cell differentiation	1
04664	Fc epsilon RI signaling pathway	1		04657	IL-17 signaling pathway	1
04666	Fc gamma R-mediated phagocytosis	1		04664	Fc epsilon RI signaling pathway	1
04922	Glucagon signaling pathway	1		04666	Fc gamma R-mediated phagocytosis	1
04920	Adipocytokine signaling pathway	1		04670	Leukocyte transendothelial migration	1
04921	Oxytocin signaling pathway	1		04922	Glucagon signaling pathway	1
04916	Melanogenesis	1		03320	PPAR signaling pathway	1
04925	Aldosterone synthesis and secretion	1		04913	Ovarian steroidogenesis	1
04927	Cortisol synthesis and secretion	1		04915	Estrogen signaling pathway	1
04261	Adrenergic signaling in cardiomyocytes	1		04921	Oxytocin signaling pathway	1
04270	Vascular smooth muscle contraction	1		04918	Thyroid hormone synthesis	1
04970	Salivary secretion	1		04614	Renin-angiotensin system	1
04979	Cholesterol metabolism	1		04925	Aldosterone synthesis and secretion	1
04727	GABAergic synapse	1		04927	Cortisol synthesis and secretion	1
04725	Cholinergic synapse	1		04261	Adrenergic signaling in cardiomyocytes	1
04728	Dopaminergic synapse	1		04971	Gastric acid secretion	1
04721	Synaptic vesicle cycle	1		04962	Vasopressin-regulated water reabsorption	1
04750	Inflammatory mediator regulation of TRP channels	1		04960	Aldosterone-regulated sodium reabsorption	1
04380	Osteoclast differentiation	1		04961	Endocrine and other factor-regulated calcium reabsorption	1
04211	Longevity regulating pathway	1		04724	Glutamatergic synapse	1
04626	Plant-pathogen interaction	1		04727	GABAergic synapse	1
05206	MicroRNAs in cancer	1		04725	Cholinergic synapse	1
05210	Colorectal cancer	1		04721	Synaptic vesicle cycle	1
05212	Pancreatic cancer	1		04740	Olfactory transduction	1
05226	Gastric cancer	1		04380	Osteoclast differentiation	1
05216	Thyroid cancer	1		04710	Circadian rhythm	1
05217	Basal cell carcinoma	1		05204	Chemical carcinogenesis	1
05218	Melanoma	1		05230	Central carbon metabolism in cancer	1
05211	Renal cell carcinoma	1		05214	Glioma	1
05213	Endometrial cancer	1		05220	Chronic myeloid leukemia	1
05224	Breast cancer	1		05218	Melanoma	1
05322	Systemic lupus erythematosus	1		05211	Renal cell carcinoma	1
05323	Rheumatoid arthritis	1		05215	Prostate cancer	1
05030	Cocaine addiction	1		05323	Rheumatoid arthritis	1
05034	Alcoholism	1		05030	Cocaine addiction	1
05416	Viral myocarditis	1		05031	Amphetamine addiction	1
04940	Type I diabetes mellitus	1		05410	Hypertrophic cardiomyopathy	1
04950	Maturity onset diabetes of the young	1		05412	Arrhythmogenic right ventricular cardiomyopathy	1
04932	Non-alcoholic fatty liver disease	1		05414	Dilated cardiomyopathy	1
04934	Cushing syndrome	1		04950	Maturity onset diabetes of the young	1
05110	Vibrio cholerae infection	1		05133	Pertussis	1
05133	Pertussis	1		05100	Bacterial invasion of epithelial cells	1
05146	Amoebiasis	1		05160	Hepatitis C	1
05144	Malaria	1		05145	Toxoplasmosis	1
01521	EGFR tyrosine kinase inhibitor resistance	1		01524	Platinum drug resistance	1
