# Supplementary material for: Transcriptome Analysis of the Japanese Pine Sawyer Beetle, Monochamus alternatus, Infected with the Entomopathogenic Fungus Metarhizium anisopliae JEF-197
Source: J Fungi (Basel). 2021 May 10;7(5):373. doi: 10.3390/jof7050373 (PMC8151162; doi:10.3390/jof7050373)
Supplement: Supplementary file 1 [file jof-07-00373-s001.zip › Supplementary Table S5.xlsx]

## Sheet: Log2FC>1
Supplementary Table S5. Enriched GO term and KEGG of Metarhizium anisopliae JEF-197-treated Japanese pine sawyer using a g:profiler (FDR*<0.05)
source	term_name	term_id	adjusted_p_value	negative_log10_of_adjusted_p_value	term_size	query_size	intersection_size	effective_domain_size
GO:MF	nucleic acid binding	GO:0003676	5.42706e-08	7.26544	1648	359	122	8255
GO:MF	RNA binding	GO:0003723	0.000281434	3.55062	414	359	40	8255
GO:MF	heterocyclic compound binding	GO:1901363	0.000644454	3.19081	2777	359	160	8255
GO:MF	organic cyclic compound binding	GO:0097159	0.000644454	3.19081	2779	359	160	8255
GO:MF	binding	GO:0005488	0.000644454	3.19081	5491	359	276	8255
GO:MF	catalytic activity, acting on RNA	GO:0140098	0.00139836	2.85438	148	359	19	8255
GO:MF	catalytic activity, acting on a tRNA	GO:0140101	0.0419686	1.37708	70	359	10	8255
GO:MF	transferase activity, transferring amino-acyl groups	GO:0016755	0.0419686	1.37708	5	359	3	8255
GO:BP	cellular nitrogen compound metabolic process	GO:0034641	9.20591e-07	6.03593	1530	251	106	6080
GO:BP	gene expression	GO:0010467	7.33442e-06	5.13463	1038	251	78	6080
GO:BP	nucleic acid metabolic process	GO:0090304	1.09804e-05	4.95938	1115	251	81	6080
GO:BP	macromolecule metabolic process	GO:0043170	1.67025e-05	4.77722	2476	251	143	6080
GO:BP	nitrogen compound metabolic process	GO:0006807	3.11755e-05	4.50619	2701	251	151	6080
GO:BP	cellular aromatic compound metabolic process	GO:0006725	3.11755e-05	4.50619	1320	251	89	6080
GO:BP	RNA metabolic process	GO:0016070	3.76418e-05	4.42433	820	251	63	6080
GO:BP	organic cyclic compound metabolic process	GO:1901360	3.85067e-05	4.41446	1334	251	89	6080
GO:BP	nucleobase-containing compound metabolic process	GO:0006139	4.0008e-05	4.39785	1280	251	86	6080
GO:BP	heterocycle metabolic process	GO:0046483	4.0008e-05	4.39785	1318	251	88	6080
GO:BP	organic substance metabolic process	GO:0071704	5.85329e-05	4.2326	3167	251	168	6080
GO:BP	cellular metabolic process	GO:0044237	0.00015193	3.81836	2571	251	142	6080
GO:BP	macromolecule biosynthetic process	GO:0009059	0.00027705	3.55744	908	251	64	6080
GO:BP	ncRNA metabolic process	GO:0034660	0.00027705	3.55744	143	251	19	6080
GO:BP	primary metabolic process	GO:0044238	0.00027705	3.55744	2991	251	158	6080
GO:BP	cellular macromolecule biosynthetic process	GO:0034645	0.00027705	3.55744	906	251	64	6080
GO:BP	amide biosynthetic process	GO:0043604	0.000338245	3.47077	245	251	26	6080
GO:BP	response to stress	GO:0006950	0.000480762	3.31807	206	251	23	6080
GO:BP	cellular biosynthetic process	GO:0044249	0.000684334	3.16473	1159	251	75	6080
GO:BP	RNA processing	GO:0006396	0.000813595	3.08959	229	251	24	6080
GO:BP	cellular response to stress	GO:0033554	0.000845327	3.07298	144	251	18	6080
GO:BP	peptide biosynthetic process	GO:0043043	0.0010067	2.9971	234	251	24	6080
GO:BP	cellular amide metabolic process	GO:0043603	0.0010067	2.9971	280	251	27	6080
GO:BP	organic substance biosynthetic process	GO:1901576	0.0010067	2.9971	1179	251	75	6080
GO:BP	tRNA metabolic process	GO:0006399	0.00133727	2.87378	98	251	14	6080
GO:BP	cellular response to DNA damage stimulus	GO:0006974	0.00146601	2.83386	125	251	16	6080
GO:BP	translation	GO:0006412	0.00189879	2.72152	230	251	23	6080
GO:BP	DNA repair	GO:0006281	0.00208676	2.68053	116	251	15	6080
GO:BP	peptide metabolic process	GO:0006518	0.00220533	2.65653	249	251	24	6080
GO:BP	biosynthetic process	GO:0009058	0.00237153	2.62497	1216	251	75	6080
GO:BP	cellular nitrogen compound biosynthetic process	GO:0044271	0.00251281	2.59984	892	251	59	6080
GO:BP	cellular process	GO:0009987	0.00308313	2.51101	4496	251	210	6080
GO:BP	vacuolar transport	GO:0007034	0.00584128	2.23349	15	251	5	6080
GO:BP	DNA replication	GO:0006260	0.00584128	2.23349	76	251	11	6080
GO:BP	cellular macromolecule metabolic process	GO:0044260	0.00652867	2.18518	1783	251	99	6080
GO:BP	metabolic process	GO:0008152	0.0120632	1.91854	3763	251	180	6080
GO:BP	ncRNA processing	GO:0034470	0.0137851	1.86059	98	251	12	6080
GO:BP	organonitrogen compound biosynthetic process	GO:1901566	0.0186426	1.72949	454	251	33	6080
GO:BP	ribosome biogenesis	GO:0042254	0.0228858	1.64043	64	251	9	6080
GO:BP	cellular amino acid metabolic process	GO:0006520	0.0228858	1.64043	119	251	13	6080
GO:BP	amino acid activation	GO:0043038	0.0275454	1.55995	42	251	7	6080
GO:BP	tRNA aminoacylation	GO:0043039	0.0275454	1.55995	42	251	7	6080
GO:BP	maturation of SSU-rRNA from tricistronic rRNA transcript (SSU-rRNA, 5.8S rRNA, LSU-rRNA)	GO:0000462	0.0307963	1.5115	2	251	2	6080
GO:BP	ribonucleoprotein complex biogenesis	GO:0022613	0.0307963	1.5115	95	251	11	6080
GO:BP	ribosomal small subunit biogenesis	GO:0042274	0.0368397	1.43368	7	251	3	6080
GO:BP	'de novo' IMP biosynthetic process	GO:0006189	0.0368397	1.43368	7	251	3	6080
GO:CC	intracellular	GO:0005622	3.11164e-15	14.507	2293	213	144	5841
GO:CC	intracellular organelle	GO:0043229	8.89925e-12	11.0506	1703	213	113	5841
GO:CC	organelle	GO:0043226	1.84802e-11	10.7333	1777	213	115	5841
GO:CC	intracellular membrane-bounded organelle	GO:0043231	2.57312e-09	8.58954	1343	213	91	5841
GO:CC	nucleus	GO:0005634	2.57312e-09	8.58954	978	213	74	5841
GO:CC	membrane-bounded organelle	GO:0043227	1.01276e-08	7.99449	1427	213	93	5841
GO:CC	protein-containing complex	GO:0032991	5.08019e-05	4.29412	852	213	57	5841
GO:CC	ribosome	GO:0005840	8.04607e-05	4.09442	156	213	19	5841
GO:CC	organelle lumen	GO:0043233	0.00025517	3.59317	220	213	22	5841
GO:CC	intracellular organelle lumen	GO:0070013	0.00025517	3.59317	220	213	22	5841
GO:CC	membrane-enclosed lumen	GO:0031974	0.00025517	3.59317	220	213	22	5841
GO:CC	nuclear lumen	GO:0031981	0.0014732	2.83174	180	213	18	5841
GO:CC	DNA-directed RNA polymerase complex	GO:0000428	0.00154604	2.81078	32	213	7	5841
GO:CC	RNA polymerase complex	GO:0030880	0.00154604	2.81078	32	213	7	5841
GO:CC	ribonucleoprotein complex	GO:1990904	0.00154604	2.81078	106	213	13	5841
GO:CC	nuclear DNA-directed RNA polymerase complex	GO:0055029	0.00154604	2.81078	32	213	7	5841
GO:CC	non-membrane-bounded organelle	GO:0043228	0.00197349	2.70477	471	213	33	5841
GO:CC	intracellular non-membrane-bounded organelle	GO:0043232	0.00197349	2.70477	471	213	33	5841
GO:CC	RNA polymerase II transcription regulator complex	GO:0090575	0.00235168	2.62862	25	213	6	5841
GO:CC	nucleoplasm	GO:0005654	0.00285612	2.54422	116	213	13	5841
GO:CC	RNA polymerase II, holoenzyme	GO:0016591	0.00334555	2.47553	27	213	6	5841
GO:CC	transferase complex, transferring phosphorus-containing groups	GO:0061695	0.00765451	2.11608	43	213	7	5841
GO:CC	exocyst	GO:0000145	0.0209366	1.67909	8	213	3	5841
GO:CC	mitochondrial large ribosomal subunit	GO:0005762	0.0307072	1.51276	3	213	2	5841
GO:CC	Mre11 complex	GO:0030870	0.0307072	1.51276	3	213	2	5841
GO:CC	organellar large ribosomal subunit	GO:0000315	0.0307072	1.51276	3	213	2	5841
GO:CC	cell cortex	GO:0005938	0.0362026	1.44126	10	213	3	5841
GO:CC	transcription factor TFIID complex	GO:0005669	0.0467216	1.33048	11	213	3	5841
*FDR, False discovery rate

## Sheet: 1<Log2FC<2
Supplementary Table S5. Enriched GO term and KEGG of Metarhizium anisopliae JEF-197-inoculated Japanese pine sawyer using a g:profiler (FDR*<0.05)
source	term_name	term_id	adjusted_p_value	negative_log10_of_adjusted_p_value	term_size	query_size	intersection_size	effective_domain_size
GO:MF	nucleic acid binding	GO:0003676	0.00253412	2.59617	1648	170	57	8255
GO:MF	structural constituent of ribosome	GO:0003735	0.00253412	2.59617	132	170	12	8255
GO:MF	transferase activity, transferring alkylthio groups	GO:0050497	0.0280399	1.55222	2	170	2	8255
GO:MF	methylthiotransferase activity	GO:0035596	0.0280399	1.55222	2	170	2	8255
GO:MF	RNA binding	GO:0003723	0.0412015	1.38509	414	170	19	8255
GO:MF	catalytic activity, acting on RNA	GO:0140098	0.0412015	1.38509	148	170	10	8255
GO:BP	macromolecule biosynthetic process	GO:0009059	0.00251351	2.59972	908	121	35	6080
GO:BP	gene expression	GO:0010467	0.00251351	2.59972	1038	121	39	6080
GO:BP	cellular nitrogen compound metabolic process	GO:0034641	0.00251351	2.59972	1530	121	51	6080
GO:BP	cellular macromolecule biosynthetic process	GO:0034645	0.00251351	2.59972	906	121	35	6080
GO:BP	peptide biosynthetic process	GO:0043043	0.00251351	2.59972	234	121	16	6080
GO:BP	macromolecule metabolic process	GO:0043170	0.00251351	2.59972	2476	121	71	6080
GO:BP	cellular amide metabolic process	GO:0043603	0.00251351	2.59972	280	121	17	6080
GO:BP	amide biosynthetic process	GO:0043604	0.00251351	2.59972	245	121	17	6080
GO:BP	translation	GO:0006412	0.00251351	2.59972	230	121	15	6080
GO:BP	peptide metabolic process	GO:0006518	0.00251351	2.59972	249	121	16	6080
GO:BP	cellular process	GO:0009987	0.00282749	2.5486	4496	121	107	6080
GO:BP	cellular biosynthetic process	GO:0044249	0.00282749	2.5486	1159	121	41	6080
GO:BP	DNA repair	GO:0006281	0.00347241	2.45937	116	121	10	6080
GO:BP	organic substance biosynthetic process	GO:1901576	0.00362035	2.44125	1179	121	41	6080
GO:BP	cellular response to stress	GO:0033554	0.00400354	2.39756	144	121	11	6080
GO:BP	cellular response to DNA damage stimulus	GO:0006974	0.0052768	2.27763	125	121	10	6080
GO:BP	biosynthetic process	GO:0009058	0.0060517	2.21812	1216	121	41	6080
GO:BP	nucleic acid metabolic process	GO:0090304	0.00875108	2.05794	1115	121	38	6080
GO:BP	cellular metabolic process	GO:0044237	0.00919113	2.03663	2571	121	70	6080
GO:BP	cellular macromolecule metabolic process	GO:0044260	0.0108671	1.96389	1783	121	53	6080
GO:BP	ncRNA metabolic process	GO:0034660	0.0119801	1.92154	143	121	10	6080
GO:BP	organonitrogen compound biosynthetic process	GO:1901566	0.0124804	1.90377	454	121	20	6080
GO:BP	mitochondrial translation	GO:0032543	0.0125558	1.90116	9	121	3	6080
GO:BP	tRNA metabolic process	GO:0006399	0.0139964	1.85398	98	121	8	6080
GO:BP	response to stress	GO:0006950	0.0147212	1.83206	206	121	12	6080
GO:BP	nitrogen compound metabolic process	GO:0006807	0.0191511	1.71781	2701	121	71	6080
GO:BP	organic substance metabolic process	GO:0071704	0.0203192	1.69209	3167	121	80	6080
GO:BP	mitochondrial gene expression	GO:0140053	0.0258559	1.58744	12	121	3	6080
GO:BP	cellular nitrogen compound biosynthetic process	GO:0044271	0.0354089	1.45089	892	121	30	6080
GO:BP	RNA metabolic process	GO:0016070	0.039915	1.39886	820	121	28	6080
GO:BP	vacuolar transport	GO:0007034	0.0462381	1.335	15	121	3	6080
GO:CC	intracellular	GO:0005622	1.86382e-14	13.7296	2293	116	89	5841
GO:CC	intracellular organelle	GO:0043229	5.17624e-10	9.28599	1703	116	69	5841
GO:CC	organelle	GO:0043226	3.00434e-09	8.52225	1777	116	69	5841
GO:CC	ribosome	GO:0005840	1.66176e-06	5.77943	156	116	16	5841
GO:CC	intracellular membrane-bounded organelle	GO:0043231	1.66176e-06	5.77943	1343	116	53	5841
GO:CC	membrane-bounded organelle	GO:0043227	3.48786e-06	5.45744	1427	116	54	5841
GO:CC	protein-containing complex	GO:0032991	3.19188e-05	4.49595	852	116	37	5841
GO:CC	nucleus	GO:0005634	0.000731565	3.13575	978	116	37	5841
GO:CC	intracellular organelle lumen	GO:0070013	0.00136631	2.86445	220	116	14	5841
GO:CC	non-membrane-bounded organelle	GO:0043228	0.00136631	2.86445	471	116	22	5841
GO:CC	intracellular non-membrane-bounded organelle	GO:0043232	0.00136631	2.86445	471	116	22	5841
GO:CC	organelle lumen	GO:0043233	0.00136631	2.86445	220	116	14	5841
GO:CC	membrane-enclosed lumen	GO:0031974	0.00136631	2.86445	220	116	14	5841
GO:CC	organellar large ribosomal subunit	GO:0000315	0.0118882	1.92488	3	116	2	5841
GO:CC	mitochondrial large ribosomal subunit	GO:0005762	0.0118882	1.92488	3	116	2	5841
GO:CC	cytoplasm	GO:0005737	0.0159739	1.79659	763	116	27	5841
GO:CC	mitochondrial ribosome	GO:0005761	0.0161501	1.79183	13	116	3	5841
GO:CC	organellar ribosome	GO:0000313	0.0161501	1.79183	13	116	3	5841
GO:CC	mitochondrial matrix	GO:0005759	0.0169579	1.77063	28	116	4	5841
GO:CC	nuclear pore	GO:0005643	0.0213938	1.66971	15	116	3	5841
GO:CC	nuclear lumen	GO:0031981	0.0213938	1.66971	180	116	10	5841
GO:CC	RNA polymerase complex	GO:0030880	0.0221825	1.65399	32	116	4	5841
GO:CC	nuclear DNA-directed RNA polymerase complex	GO:0055029	0.0221825	1.65399	32	116	4	5841
GO:CC	DNA-directed RNA polymerase complex	GO:0000428	0.0221825	1.65399	32	116	4	5841
GO:CC	nuclear envelope	GO:0005635	0.028575	1.54401	18	116	3	5841
GO:CC	spliceosomal complex	GO:0005681	0.028575	1.54401	18	116	3	5841
GO:CC	ribonucleoprotein complex	GO:1990904	0.028575	1.54401	106	116	7	5841
GO:CC	mitochondrion	GO:0005739	0.0303706	1.51755	197	116	10	5841
GO:CC	nucleoplasm	GO:0005654	0.0423642	1.373	116	116	7	5841
KEGG	RNA transport	KEGG:03013	0.00700001	2.1549	100	70	11	2324
*FDR, False discovery rate

## Sheet: 2<Log2FC<3
Supplementary Table S5. Enriched GO term and KEGG of Metarhizium anisopliae JEF-197-inoculated Japanese pine sawyer using a g:profiler (FDR*<0.05)
source	term_name	term_id	adjusted_p_value	negative_log10_of_adjusted_p_value	term_size	query_size	intersection_size	effective_domain_size
GO:MF	nucleic acid binding	GO:0003676	3.63928e-09	8.43898	1648	160	69	8255
GO:MF	organic cyclic compound binding	GO:0097159	6.00309e-07	6.22163	2779	160	89	8255
GO:MF	heterocyclic compound binding	GO:1901363	6.00309e-07	6.22163	2777	160	89	8255
GO:MF	binding	GO:0005488	3.91896e-05	4.40683	5491	160	134	8255
GO:MF	RNA binding	GO:0003723	0.0022933	2.63954	414	160	21	8255
GO:MF	snoRNA binding	GO:0030515	0.0460752	1.33653	3	160	2	8255
GO:BP	nucleic acid metabolic process	GO:0090304	1.55351e-05	4.80869	1115	104	43	6080
GO:BP	RNA metabolic process	GO:0016070	2.35404e-05	4.62819	820	104	35	6080
GO:BP	macromolecule metabolic process	GO:0043170	4.35056e-05	4.36146	2476	104	68	6080
GO:BP	gene expression	GO:0010467	5.05786e-05	4.29603	1038	104	39	6080
GO:BP	cellular nitrogen compound metabolic process	GO:0034641	8.35342e-05	4.07814	1530	104	49	6080
GO:BP	nucleobase-containing compound metabolic process	GO:0006139	0.000148664	3.82779	1280	104	43	6080
GO:BP	heterocycle metabolic process	GO:0046483	0.000246153	3.60879	1318	104	43	6080
GO:BP	cellular aromatic compound metabolic process	GO:0006725	0.000246153	3.60879	1320	104	43	6080
GO:BP	nitrogen compound metabolic process	GO:0006807	0.000246153	3.60879	2701	104	69	6080
GO:BP	organic cyclic compound metabolic process	GO:1901360	0.000279339	3.55387	1334	104	43	6080
GO:BP	RNA processing	GO:0006396	0.00133237	2.87538	229	104	14	6080
GO:BP	organic substance metabolic process	GO:0071704	0.0102872	1.9877	3167	104	72	6080
GO:BP	macromolecule biosynthetic process	GO:0009059	0.0152585	1.81649	908	104	29	6080
GO:BP	cellular macromolecule biosynthetic process	GO:0034645	0.0152585	1.81649	906	104	29	6080
GO:BP	cellular metabolic process	GO:0044237	0.0165231	1.78191	2571	104	61	6080
GO:BP	primary metabolic process	GO:0044238	0.0173824	1.75989	2991	104	68	6080
GO:BP	ncRNA metabolic process	GO:0034660	0.0196045	1.70764	143	104	9	6080
GO:BP	ribosome biogenesis	GO:0042254	0.0196045	1.70764	64	104	6	6080
GO:BP	regulation of DNA replication	GO:0006275	0.0219461	1.65864	3	104	2	6080
GO:BP	ribonucleoprotein complex biogenesis	GO:0022613	0.0273128	1.56363	95	104	7	6080
GO:CC	nucleus	GO:0005634	1.0648e-07	6.97273	978	81	37	5841
GO:CC	organelle	GO:0043226	4.69323e-05	4.32853	1777	81	45	5841
GO:CC	intracellular organelle	GO:0043229	4.69323e-05	4.32853	1703	81	44	5841
GO:CC	intracellular membrane-bounded organelle	GO:0043231	4.69323e-05	4.32853	1343	81	38	5841
GO:CC	intracellular	GO:0005622	4.69323e-05	4.32853	2293	81	53	5841
GO:CC	membrane-bounded organelle	GO:0043227	5.34215e-05	4.27228	1427	81	39	5841
KEGG	Spliceosome	KEGG:03040	0.0121618	1.915	101	42	8	2324
KEGG	Ribosome biogenesis in eukaryotes	KEGG:03008	0.0121618	1.915	61	42	6	2324
KEGG	Toll and Imd signaling pathway	KEGG:04624	0.0199912	1.69916	29	42	4	2324
*FDR, False discovery rate

## Sheet: Log2FC>3
Supplementary Table S5. Enriched GO term and KEGG of Metarhizium anisopliae JEF-197-inoculated Japanese pine sawyer using a g:profiler (FDR*<0.05)
source	term_name	term_id	adjusted_p_value	negative_log10_of_adjusted_p_value	term_size	query_size	intersection_size	effective_domain_size
GO:MF	endopeptidase activity	GO:0004175	0.026229	1.58122	328	49	8	8255
GO:MF	hydroxymethyl-, formyl- and related transferase activity	GO:0016742	0.026229	1.58122	5	49	2	8255
GO:MF	hydrolase activity	GO:0016787	0.026229	1.58122	1531	49	19	8255
GO:MF	ligase activity, forming carbon-nitrogen bonds	GO:0016879	0.026229	1.58122	29	49	3	8255
GO:BP	IMP metabolic process	GO:0046040	0.000934749	3.0293	8	36	3	6080
GO:BP	'de novo' IMP biosynthetic process	GO:0006189	0.000934749	3.0293	7	36	3	6080
GO:BP	IMP biosynthetic process	GO:0006188	0.000934749	3.0293	8	36	3	6080
GO:BP	purine ribonucleoside monophosphate biosynthetic process	GO:0009168	0.00163241	2.78717	11	36	3	6080
GO:BP	purine nucleoside monophosphate biosynthetic process	GO:0009127	0.00163241	2.78717	11	36	3	6080
GO:BP	purine ribonucleoside monophosphate metabolic process	GO:0009167	0.00200467	2.69796	13	36	3	6080
GO:BP	purine nucleoside monophosphate metabolic process	GO:0009126	0.00200467	2.69796	13	36	3	6080
GO:BP	ribonucleoside monophosphate biosynthetic process	GO:0009156	0.00339285	2.46944	16	36	3	6080
GO:BP	ribonucleoside monophosphate metabolic process	GO:0009161	0.0043589	2.36062	18	36	3	6080
GO:BP	nucleoside monophosphate biosynthetic process	GO:0009124	0.00463964	2.33352	19	36	3	6080
GO:BP	purine nucleobase biosynthetic process	GO:0009113	0.00494633	2.30572	4	36	2	6080
GO:BP	nucleoside monophosphate metabolic process	GO:0009123	0.00526374	2.27871	21	36	3	6080
GO:BP	one-carbon metabolic process	GO:0006730	0.0069496	2.15804	5	36	2	6080
GO:BP	glycosyl compound metabolic process	GO:1901657	0.0100811	1.99649	28	36	3	6080
GO:BP	nucleoside metabolic process	GO:0009116	0.0100811	1.99649	28	36	3	6080
GO:BP	purine nucleobase metabolic process	GO:0006144	0.0117696	1.92924	7	36	2	6080
GO:BP	purine-containing compound metabolic process	GO:0072521	0.0231752	1.63498	86	36	4	6080
GO:BP	nucleobase biosynthetic process	GO:0046112	0.0231752	1.63498	10	36	2	6080
GO:BP	nucleobase-containing small molecule metabolic process	GO:0055086	0.0238054	1.62332	149	36	5	6080
GO:BP	pigment biosynthetic process	GO:0046148	0.0264052	1.57831	12	36	2	6080
GO:BP	small molecule metabolic process	GO:0044281	0.0264052	1.57831	405	36	8	6080
GO:BP	pigment metabolic process	GO:0042440	0.0264052	1.57831	12	36	2	6080
GO:BP	organonitrogen compound metabolic process	GO:1901564	0.0284993	1.54517	1635	36	18	6080
GO:BP	nucleobase metabolic process	GO:0009112	0.0284993	1.54517	13	36	2	6080
GO:BP	purine ribonucleotide biosynthetic process	GO:0009152	0.0294439	1.53101	48	36	3	6080
GO:BP	purine nucleotide biosynthetic process	GO:0006164	0.0300358	1.52236	49	36	3	6080
GO:BP	ribonucleotide biosynthetic process	GO:0009260	0.0348923	1.45727	53	36	3	6080
GO:BP	ribose phosphate biosynthetic process	GO:0046390	0.0348923	1.45727	53	36	3	6080
GO:BP	purine-containing compound biosynthetic process	GO:0072522	0.0374244	1.42684	55	36	3	6080
GO:BP	cell adhesion	GO:0007155	0.0426857	1.36972	59	36	3	6080
GO:BP	biological adhesion	GO:0022610	0.0426857	1.36972	59	36	3	6080
GO:BP	tetrahydrofolate interconversion	GO:0035999	0.0427188	1.36938	1	36	1	6080
GO:BP	S-adenosylhomocysteine metabolic process	GO:0046498	0.0427188	1.36938	1	36	1	6080
GO:BP	glycine biosynthetic process from serine	GO:0019264	0.0427188	1.36938	1	36	1	6080
GO:BP	phagocytosis	GO:0006909	0.0427188	1.36938	1	36	1	6080
GO:BP	ovarian nurse cell to oocyte transport	GO:0007300	0.0427188	1.36938	1	36	1	6080
GO:BP	S-adenosylhomocysteine catabolic process	GO:0019510	0.0427188	1.36938	1	36	1	6080
GO:BP	cellular modified amino acid metabolic process	GO:0006575	0.0427188	1.36938	20	36	2	6080
GO:BP	integrin-mediated signaling pathway	GO:0007229	0.0458343	1.33881	21	36	2	6080
KEGG	Ubiquinone and other terpenoid-quinone biosynthesis	KEGG:00130	0.0254334	1.5946	16	13	2	2324
KEGG	One carbon pool by folate	KEGG:00670	0.0254334	1.5946	11	13	2	2324
KEGG	Purine metabolism	KEGG:00230	0.0254334	1.5946	55	13	3	2324
KEGG	Glycine, serine and threonine metabolism	KEGG:00260	0.0298229	1.52545	20	13	2	2324
KEGG	Cysteine and methionine metabolism	KEGG:00270	0.042389	1.37275	29	13	2	2324
KEGG	Metabolic pathways	KEGG:01100	0.042389	1.37275	801	13	9	2324
*FDR, False discovery rate

## Sheet: Log2FC<-1
Supplementary Table S5. Enriched GO term and KEGG of Metarhizium anisopliae JEF-197-inoculated Japanese pine sawyer using a g:profiler (FDR*<0.05)
source	term_name	term_id	adjusted_p_value	negative_log10_of_adjusted_p_value	term_size	query_size	intersection_size	effective_domain_size
GO:MF	nucleic acid binding	GO:0003676	5.59708e-17	16.252	1648	400	156	8255
GO:MF	RNA-directed DNA polymerase activity	GO:0003964	1.01466e-12	11.9937	36	400	18	8255
GO:MF	DNA polymerase activity	GO:0034061	2.92637e-12	11.5337	61	400	22	8255
GO:MF	DNA binding	GO:0003677	1.03282e-08	7.98598	628	400	68	8255
GO:MF	organic cyclic compound binding	GO:0097159	1.31919e-08	7.87969	2779	400	194	8255
GO:MF	heterocyclic compound binding	GO:1901363	1.31919e-08	7.87969	2777	400	194	8255
GO:MF	catalytic activity, acting on DNA	GO:0140097	2.77859e-08	7.55618	151	400	28	8255
GO:MF	nucleotidyltransferase activity	GO:0016779	1.47716e-07	6.83057	123	400	24	8255
GO:MF	transferase activity, transferring phosphorus-containing groups	GO:0016772	0.00306986	2.51288	518	400	45	8255
GO:MF	structural constituent of cuticle	GO:0042302	0.0137965	1.86023	115	400	15	8255
GO:BP	DNA integration	GO:0015074	5.15034e-46	45.2882	130	263	60	6080
GO:BP	DNA metabolic process	GO:0006259	8.67786e-27	26.0616	313	263	66	6080
GO:BP	nucleic acid metabolic process	GO:0090304	3.09413e-14	13.5095	1115	263	104	6080
GO:BP	DNA recombination	GO:0006310	2.49775e-12	11.6025	113	263	28	6080
GO:BP	cellular aromatic compound metabolic process	GO:0006725	5.34873e-12	11.2717	1320	263	110	6080
GO:BP	cellular macromolecule metabolic process	GO:0044260	5.34873e-12	11.2717	1783	263	134	6080
GO:BP	nucleobase-containing compound metabolic process	GO:0006139	1.06804e-11	10.9714	1280	263	107	6080
GO:BP	heterocycle metabolic process	GO:0046483	2.67045e-11	10.5734	1318	263	108	6080
GO:BP	organic cyclic compound metabolic process	GO:1901360	5.4887e-11	10.2605	1334	263	108	6080
GO:BP	cellular nitrogen compound metabolic process	GO:0034641	1.00085e-09	8.99963	1530	263	115	6080
GO:BP	macromolecule metabolic process	GO:0043170	1.06427e-06	5.97295	2476	263	151	6080
GO:BP	cellular metabolic process	GO:0044237	1.75069e-05	4.75679	2571	263	151	6080
GO:BP	cellular process	GO:0009987	2.60271e-05	4.58457	4496	263	227	6080
GO:BP	nitrogen compound metabolic process	GO:0006807	0.000151509	3.81956	2701	263	153	6080
GO:BP	organic substance metabolic process	GO:0071704	0.00229177	2.63983	3167	263	168	6080
GO:BP	anatomical structure development	GO:0048856	0.00443233	2.35337	128	263	16	6080
GO:BP	primary metabolic process	GO:0044238	0.00443233	2.35337	2991	263	159	6080
GO:BP	developmental process	GO:0032502	0.009112	2.04039	137	263	16	6080
GO:BP	regulation of gene expression	GO:0010468	0.0113138	1.94639	517	263	39	6080
GO:BP	regulation of macromolecule metabolic process	GO:0060255	0.0113138	1.94639	553	263	41	6080
GO:BP	multicellular organism development	GO:0007275	0.0113138	1.94639	113	263	14	6080
GO:BP	regulation of nitrogen compound metabolic process	GO:0051171	0.0119418	1.92293	505	263	38	6080
GO:BP	transposition, DNA-mediated	GO:0006313	0.0119418	1.92293	43	263	8	6080
GO:BP	biological regulation	GO:0065007	0.0119418	1.92293	1504	263	89	6080
GO:BP	transposition	GO:0032196	0.0119418	1.92293	43	263	8	6080
GO:BP	regulation of primary metabolic process	GO:0080090	0.012412	1.90616	507	263	38	6080
GO:BP	enzyme linked receptor protein signaling pathway	GO:0007167	0.0131606	1.88072	25	263	6	6080
GO:BP	regulation of metabolic process	GO:0019222	0.0137331	1.86223	566	263	41	6080
GO:BP	regulation of cellular metabolic process	GO:0031323	0.0156708	1.80491	516	263	38	6080
GO:BP	cell surface receptor signaling pathway	GO:0007166	0.0158473	1.80005	122	263	14	6080
GO:BP	regulation of cellular biosynthetic process	GO:0031326	0.017424	1.75885	469	263	35	6080
GO:BP	regulation of biological process	GO:0050789	0.017424	1.75885	1430	263	84	6080
GO:BP	regulation of cellular macromolecule biosynthetic process	GO:2000112	0.017424	1.75885	468	263	35	6080
GO:BP	regulation of macromolecule biosynthetic process	GO:0010556	0.017424	1.75885	468	263	35	6080
GO:BP	regulation of biosynthetic process	GO:0009889	0.0182677	1.73832	471	263	35	6080
GO:BP	regulation of cellular process	GO:0050794	0.0219743	1.65809	1381	263	81	6080
GO:BP	regulation of RNA metabolic process	GO:0051252	0.0303103	1.51841	450	263	33	6080
GO:BP	regulation of nucleobase-containing compound metabolic process	GO:0019219	0.0317593	1.49813	452	263	33	6080
GO:BP	metabolic process	GO:0008152	0.0352568	1.45276	3763	263	185	6080
GO:BP	regulation of transcription, DNA-templated	GO:0006355	0.0385633	1.41383	442	263	32	6080
GO:BP	regulation of nucleic acid-templated transcription	GO:1903506	0.0385633	1.41383	442	263	32	6080
GO:BP	regulation of RNA biosynthetic process	GO:2001141	0.0385633	1.41383	442	263	32	6080
GO:BP	response to chemical	GO:0042221	0.0389046	1.41	56	263	8	6080
*FDR, False discovery rate

## Sheet: -1>Log2FC>-2
Supplementary Table S5. Enriched GO term and KEGG of Metarhizium anisopliae JEF-197-inoculated Japanese pine sawyer using a g:profiler (FDR*<0.05)
source	term_name	term_id	adjusted_p_value	negative_log10_of_adjusted_p_value	term_size	query_size	intersection_size	effective_domain_size
GO:MF	nucleic acid binding	GO:0003676	0.000573753	3.24127	1648	173	59	8255
GO:MF	DNA binding	GO:0003677	0.000573753	3.24127	628	173	31	8255
GO:MF	RNA-directed DNA polymerase activity	GO:0003964	0.000573753	3.24127	36	173	7	8255
GO:MF	protein serine/threonine kinase activity	GO:0004674	0.00491111	2.30882	109	173	10	8255
GO:MF	DNA polymerase activity	GO:0034061	0.0115811	1.93625	61	173	7	8255
GO:MF	Wnt-activated receptor activity	GO:0042813	0.0150386	1.82279	2	173	2	8255
GO:MF	transferase activity, transferring phosphorus-containing groups	GO:0016772	0.0150386	1.82279	518	173	23	8255
GO:MF	organic cyclic compound binding	GO:0097159	0.0387771	1.41143	2779	173	77	8255
GO:MF	protein kinase activity	GO:0004672	0.0387771	1.41143	243	173	13	8255
GO:MF	heterocyclic compound binding	GO:1901363	0.0387771	1.41143	2777	173	77	8255
GO:BP	DNA integration	GO:0015074	1.02541e-09	8.9891	130	130	20	6080
GO:BP	DNA metabolic process	GO:0006259	0.000561611	3.25056	313	130	21	6080
GO:BP	cellular process	GO:0009987	0.000580914	3.23589	4496	130	117	6080
GO:BP	regulation of biological process	GO:0050789	0.00167082	2.77707	1430	130	52	6080
GO:BP	regulation of cellular process	GO:0050794	0.00167082	2.77707	1381	130	51	6080
GO:BP	DNA recombination	GO:0006310	0.00203348	2.69176	113	130	11	6080
GO:BP	biological regulation	GO:0065007	0.00208505	2.68088	1504	130	53	6080
GO:BP	nucleic acid metabolic process	GO:0090304	0.00208505	2.68088	1115	130	43	6080
GO:BP	cellular macromolecule metabolic process	GO:0044260	0.00343178	2.46448	1783	130	59	6080
GO:BP	nucleobase-containing compound metabolic process	GO:0006139	0.00843461	2.07394	1280	130	45	6080
GO:BP	cellular aromatic compound metabolic process	GO:0006725	0.00843461	2.07394	1320	130	46	6080
GO:BP	heterocycle metabolic process	GO:0046483	0.00843461	2.07394	1318	130	46	6080
GO:BP	organic cyclic compound metabolic process	GO:1901360	0.00934078	2.02962	1334	130	46	6080
GO:BP	cell surface receptor signaling pathway	GO:0007166	0.00934078	2.02962	122	130	10	6080
GO:BP	response to organic substance	GO:0010033	0.0143618	1.84279	31	130	5	6080
GO:BP	regulation of nitrogen compound metabolic process	GO:0051171	0.0268846	1.5705	505	130	22	6080
GO:BP	regulation of RNA metabolic process	GO:0051252	0.0268846	1.5705	450	130	20	6080
GO:BP	regulation of macromolecule metabolic process	GO:0060255	0.0268846	1.5705	553	130	23	6080
GO:BP	regulation of cellular metabolic process	GO:0031323	0.0268846	1.5705	516	130	22	6080
GO:BP	regulation of primary metabolic process	GO:0080090	0.0268846	1.5705	507	130	22	6080
GO:BP	second-messenger-mediated signaling	GO:0019932	0.0268846	1.5705	3	130	2	6080
GO:BP	regulation of nucleobase-containing compound metabolic process	GO:0019219	0.0268846	1.5705	452	130	20	6080
GO:BP	regulation of gene expression	GO:0010468	0.0268846	1.5705	517	130	22	6080
GO:BP	calcium-mediated signaling	GO:0019722	0.0268846	1.5705	3	130	2	6080
GO:BP	signal transduction	GO:0007165	0.0285922	1.54375	736	130	28	6080
GO:BP	signaling	GO:0023052	0.0330913	1.48029	755	130	28	6080
GO:BP	regulation of metabolic process	GO:0019222	0.0330913	1.48029	566	130	23	6080
GO:BP	regulation of cellular biosynthetic process	GO:0031326	0.0330913	1.48029	469	130	20	6080
GO:BP	regulation of cellular macromolecule biosynthetic process	GO:2000112	0.0330913	1.48029	468	130	20	6080
GO:BP	regulation of macromolecule biosynthetic process	GO:0010556	0.0330913	1.48029	468	130	20	6080
GO:BP	regulation of biosynthetic process	GO:0009889	0.0330913	1.48029	471	130	20	6080
GO:BP	cell communication	GO:0007154	0.0330913	1.48029	754	130	28	6080
GO:BP	regulation of RNA biosynthetic process	GO:2001141	0.0342035	1.46593	442	130	19	6080
GO:BP	regulation of nucleic acid-templated transcription	GO:1903506	0.0342035	1.46593	442	130	19	6080
GO:BP	regulation of transcription, DNA-templated	GO:0006355	0.0342035	1.46593	442	130	19	6080
GO:BP	cellular nitrogen compound metabolic process	GO:0034641	0.0426591	1.36999	1530	130	47	6080
GO:BP	cell-cell signaling by wnt	GO:0198738	0.0436485	1.36003	30	130	4	6080
GO:BP	Wnt signaling pathway	GO:0016055	0.0436485	1.36003	30	130	4	6080
GO:BP	cell surface receptor signaling pathway involved in cell-cell signaling	GO:1905114	0.0436485	1.36003	30	130	4	6080
KEGG	Notch signaling pathway	KEGG:04330	0.0483438	1.31566	19	37	3	2324
KEGG	Wnt signaling pathway	KEGG:04310	0.0483438	1.31566	63	37	5	2324
KEGG	Hedgehog signaling pathway - fly	KEGG:04341	0.0483438	1.31566	19	37	3	2324
*FDR, False discovery rate

## Sheet: -2>Log2FC>-3
Supplementary Table S5. Enriched GO term and KEGG of Metarhizium anisopliae JEF-197-inoculated Japanese pine sawyer using a g:profiler (FDR*<0.05)
source	term_name	term_id	adjusted_p_value	negative_log10_of_adjusted_p_value	term_size	query_size	intersection_size	effective_domain_size
GO:MF	nucleic acid binding	GO:0003676	1.90613e-15	14.7198	1648	209	96	8255
GO:MF	RNA-directed DNA polymerase activity	GO:0003964	2.83794e-13	12.547	36	209	15	8255
GO:MF	DNA polymerase activity	GO:0034061	3.52065e-13	12.4534	61	209	18	8255
GO:MF	catalytic activity, acting on DNA	GO:0140097	9.33455e-09	8.02991	151	209	21	8255
GO:MF	nucleotidyltransferase activity	GO:0016779	9.33455e-09	8.02991	123	209	19	8255
GO:MF	organic cyclic compound binding	GO:0097159	5.53579e-08	7.25682	2779	209	112	8255
GO:MF	heterocyclic compound binding	GO:1901363	5.53579e-08	7.25682	2777	209	112	8255
GO:MF	DNA binding	GO:0003677	3.46023e-07	6.4609	628	209	41	8255
GO:BP	DNA integration	GO:0015074	5.22643e-52	51.2818	130	130	51	6080
GO:BP	DNA metabolic process	GO:0006259	2.43466e-34	33.6136	313	130	54	6080
GO:BP	nucleic acid metabolic process	GO:0090304	2.10575e-17	16.6766	1115	130	69	6080
GO:BP	DNA recombination	GO:0006310	3.62889e-16	15.4402	113	130	24	6080
GO:BP	nucleobase-containing compound metabolic process	GO:0006139	6.64036e-15	14.1778	1280	130	70	6080
GO:BP	cellular aromatic compound metabolic process	GO:0006725	6.87886e-15	14.1625	1320	130	71	6080
GO:BP	heterocycle metabolic process	GO:0046483	2.43342e-14	13.6138	1318	130	70	6080
GO:BP	organic cyclic compound metabolic process	GO:1901360	4.15624e-14	13.3813	1334	130	70	6080
GO:BP	cellular nitrogen compound metabolic process	GO:0034641	6.2085e-14	13.207	1530	130	75	6080
GO:BP	cellular macromolecule metabolic process	GO:0044260	1.12037e-13	12.9506	1783	130	81	6080
GO:BP	macromolecule metabolic process	GO:0043170	3.02576e-09	8.51917	2476	130	89	6080
GO:BP	cellular metabolic process	GO:0044237	8.65514e-08	7.06273	2571	130	88	6080
GO:BP	nitrogen compound metabolic process	GO:0006807	3.73871e-06	5.42728	2701	130	87	6080
GO:BP	organic substance metabolic process	GO:0071704	1.48141e-05	4.82933	3167	130	95	6080
GO:BP	primary metabolic process	GO:0044238	5.2273e-05	4.28172	2991	130	90	6080
GO:BP	metabolic process	GO:0008152	0.000119683	3.92197	3763	130	104	6080
GO:BP	transposition, DNA-mediated	GO:0006313	0.000549001	3.26043	43	130	7	6080
GO:BP	transposition	GO:0032196	0.000549001	3.26043	43	130	7	6080
GO:BP	cellular process	GO:0009987	0.00153931	2.81267	4496	130	114	6080
GO:BP	cell part morphogenesis	GO:0032990	0.0110974	1.95478	10	130	3	6080
GO:BP	neuron projection guidance	GO:0097485	0.0110974	1.95478	10	130	3	6080
GO:BP	axon guidance	GO:0007411	0.0110974	1.95478	10	130	3	6080
GO:BP	axon development	GO:0061564	0.0110974	1.95478	10	130	3	6080
GO:BP	cell projection morphogenesis	GO:0048858	0.0110974	1.95478	10	130	3	6080
GO:BP	neuron projection morphogenesis	GO:0048812	0.0110974	1.95478	10	130	3	6080
GO:BP	cell morphogenesis involved in neuron differentiation	GO:0048667	0.0110974	1.95478	10	130	3	6080
GO:BP	plasma membrane bounded cell projection morphogenesis	GO:0120039	0.0110974	1.95478	10	130	3	6080
GO:BP	chemotaxis	GO:0006935	0.0110974	1.95478	10	130	3	6080
GO:BP	cell morphogenesis involved in differentiation	GO:0000904	0.0110974	1.95478	10	130	3	6080
GO:BP	taxis	GO:0042330	0.0110974	1.95478	10	130	3	6080
GO:BP	axonogenesis	GO:0007409	0.0110974	1.95478	10	130	3	6080
GO:BP	cellular component morphogenesis	GO:0032989	0.0141109	1.85044	11	130	3	6080
GO:BP	neuron projection development	GO:0031175	0.0141109	1.85044	11	130	3	6080
GO:BP	cell morphogenesis	GO:0000902	0.0288272	1.5402	14	130	3	6080
GO:BP	neuron development	GO:0048666	0.0344615	1.46267	15	130	3	6080
GO:BP	system development	GO:0048731	0.0457311	1.33979	33	130	4	6080
GO:BP	response to external stimulus	GO:0009605	0.0457311	1.33979	33	130	4	6080
*FDR, False discovery rate

## Sheet: Log2FC<-3
Supplementary Table S5. Enriched GO term and KEGG of Metarhizium anisopliae JEF-197-inoculated Japanese pine sawyer using a g:profiler (FDR*<0.05)
source	term_name	term_id	adjusted_p_value	negative_log10_of_adjusted_p_value	term_size	query_size	intersection_size	effective_domain_size
GO:MF	nucleic acid binding	GO:0003676	7.31439e-13	12.1358	1648	97	54	8255
GO:MF	catalytic activity, acting on DNA	GO:0140097	7.70897e-08	7.113	151	97	14	8255
GO:MF	DNA polymerase activity	GO:0034061	7.70897e-08	7.113	61	97	10	8255
GO:MF	organic cyclic compound binding	GO:0097159	2.53292e-07	6.59638	2779	97	60	8255
GO:MF	heterocyclic compound binding	GO:1901363	2.53292e-07	6.59638	2777	97	60	8255
GO:MF	RNA-directed DNA polymerase activity	GO:0003964	3.11536e-06	5.50649	36	97	7	8255
GO:MF	DNA binding	GO:0003677	1.10294e-05	4.95745	628	97	23	8255
GO:MF	nucleotidyltransferase activity	GO:0016779	2.3411e-05	4.63058	123	97	10	8255
GO:MF	structural constituent of cuticle	GO:0042302	9.77794e-05	4.00975	115	97	9	8255
GO:MF	zinc ion binding	GO:0008270	0.000156659	3.80505	443	97	17	8255
GO:MF	structural molecule activity	GO:0005198	0.00626228	2.20327	291	97	11	8255
GO:MF	transition metal ion binding	GO:0046914	0.00916395	2.03792	628	97	17	8255
GO:MF	protein heterodimerization activity	GO:0046982	0.0108379	1.96505	40	97	4	8255
GO:MF	DNA-directed DNA polymerase activity	GO:0003887	0.0254896	1.59364	25	97	3	8255
GO:MF	DNA helicase activity	GO:0003678	0.0297459	1.52657	27	97	3	8255
GO:BP	DNA integration	GO:0015074	1.27673e-29	28.8939	130	54	27	6080
GO:BP	DNA metabolic process	GO:0006259	1.08622e-24	23.9641	313	54	31	6080
GO:BP	nucleic acid metabolic process	GO:0090304	3.7634e-12	11.4244	1115	54	35	6080
GO:BP	DNA recombination	GO:0006310	2.44886e-11	10.611	113	54	14	6080
GO:BP	cellular aromatic compound metabolic process	GO:0006725	5.89727e-11	10.2293	1320	54	36	6080
GO:BP	nucleobase-containing compound metabolic process	GO:0006139	1.36176e-10	9.8659	1280	54	35	6080
GO:BP	heterocycle metabolic process	GO:0046483	2.84889e-10	9.54532	1318	54	35	6080
GO:BP	organic cyclic compound metabolic process	GO:1901360	3.59571e-10	9.44422	1334	54	35	6080
GO:BP	cellular nitrogen compound metabolic process	GO:0034641	3.26059e-09	8.4867	1530	54	36	6080
GO:BP	cellular macromolecule metabolic process	GO:0044260	1.00041e-08	7.99982	1783	54	38	6080
GO:BP	macromolecule metabolic process	GO:0043170	1.21774e-05	4.91445	2476	54	40	6080
GO:BP	cellular metabolic process	GO:0044237	3.56863e-05	4.4475	2571	54	40	6080
GO:BP	metabolic process	GO:0008152	0.000150949	3.82117	3763	54	48	6080
GO:BP	primary metabolic process	GO:0044238	0.000226081	3.64574	2991	54	42	6080
GO:BP	organic substance metabolic process	GO:0071704	0.000351868	3.45362	3167	54	43	6080
GO:BP	transposition, DNA-mediated	GO:0006313	0.000411015	3.38614	43	54	5	6080
GO:BP	nitrogen compound metabolic process	GO:0006807	0.000411015	3.38614	2701	54	39	6080
GO:BP	transposition	GO:0032196	0.000411015	3.38614	43	54	5	6080
GO:BP	telomere organization	GO:0032200	0.00142295	2.84681	12	54	3	6080
GO:BP	telomere maintenance	GO:0000723	0.00142295	2.84681	12	54	3	6080
GO:BP	anatomical structure homeostasis	GO:0060249	0.00142295	2.84681	12	54	3	6080
GO:CC	nucleosome	GO:0000786	2.32891e-06	5.63285	24	27	5	5841
GO:CC	protein-DNA complex	GO:0032993	2.32891e-06	5.63285	26	27	5	5841
GO:CC	DNA packaging complex	GO:0044815	3.32145e-06	5.47867	30	27	5	5841
GO:CC	chromatin	GO:0000785	4.66551e-05	4.3311	53	27	5	5841
GO:CC	chromosome	GO:0005694	0.00084413	3.07359	100	27	5	5841
GO:CC	intracellular non-membrane-bounded organelle	GO:0043232	0.034351	1.46406	471	27	7	5841
GO:CC	non-membrane-bounded organelle	GO:0043228	0.034351	1.46406	471	27	7	5841
*FDR, False discovery rate
