# Supplementary material for: Transcriptome Analysis of the Japanese Pine Sawyer Beetle, Monochamus alternatus, Infected with the Entomopathogenic Fungus Metarhizium anisopliae JEF-197
Source: J Fungi (Basel). 2021 May 10;7(5):373. doi: 10.3390/jof7050373 (PMC8151162; doi:10.3390/jof7050373)
Supplement: Supplementary file 1 [file jof-07-00373-s001.zip › Supplementary Table S7.xlsx]

## Sheet: Immune
Supplimentary Table S7. List of immune-related genes in Japanese pine sawyer
Sequence_name	Length	Log2 FC	Log2 TPM					Related immune	e-Value	sim mean	Gene ID	Description	e-Value	sim mean
			Con_rep1	Con_rep2	Trt_rep1	Trt_rep2	Trt_rep3
JPS_TRINITY_DN2710_c0_g1	1662	0.215526	3.41535	2.27947	2.6487	3.74384	2.88166	Autophagy	0	67.16	XP_018564835.1	autophagy-related protein 16-1	0	99.1
JPS_TRINITY_DN5000_c0_g1	792	0.389446	2.06143	2.25822	2.81085	2.38405	2.42331	Autophagy	1.53983e-161	91.6	XP_018579453.1	autophagy protein 5	0	98.47
JPS_TRINITY_DN463_c0_g1	2388	-0.97174	4.94092	4.92372	3.87539	3.91629	4.08177	Autophagy	0	79.3	XP_018565876.1	serine/threonine-protein kinase ULK2 isoform X2	0	98.49
JPS_TRINITY_DN1625_c0_g1	1236	-0.156417	5.67112	5.30517	5.14131	5.51169	5.35315	Autophagy	0	88.41	XP_018563857.1	WD repeat domain phosphoinositide-interacting protein 2 isoform X2	0	99
JPS_TRINITY_DN6848_c0_g1	1299	1.28236	2.33485	1.37407	2.85479	3.4916	3.2299	Autophagy	0	85.07	XP_018570978.1	beclin-1-like protein	0	98.38
JPS_TRINITY_DN17484_c0_g1	942	1.38234	4.23074	2.75916	4.92191	5.17113	5.06807	Autophagy	3.98429e-178	87.74	XP_018564672.1	ubiquitin-like-conjugating enzyme ATG3	0	98.08
JPS_TRINITY_DN5907_c0_g1	1155	0.78227	1.94935	2.01792	2.65535	2.81373	2.82375	Autophagy	5.26085e-171	79.13	XP_018574253.1	ubiquitin-like modifier-activating enzyme ATG7 isoform X1	0	95.05
JPS_TRINITY_DN3943_c0_g1	11655	0.546135	2.75403	-0.426625	1.64662	2.68997	2.76998	Autophagy	0	69.48	XP_023311153.1	vacuolar protein sorting-associated protein 13B	0	95.91
JPS_TRINITY_DN1932_c0_g1	3768	0.0317537	3.69488	1.93584	3.01239	3.33728	2.91609	Autophagy	0	76.01	XP_018567225.1	RB1-inducible coiled-coil protein 1 isoform X1	0	95.47
JPS_TRINITY_DN2856_c0_g3	2025	0.468231	4.35643	3.83269	4.06152	4.76256	4.81926	Autophagy	0	71.01	XP_018561367.1	autophagy-related protein 9A	0	90.5
JPS_TRINITY_DN4608_c0_g1	1149	0.348193	3.48568	3.69977	3.94776	4.13447	3.72323	Autophagy	0	86.9	XP_018564928.1	cysteine protease ATG4B	0	98.64
JPS_TRINITY_DN8539_c0_g1	1035	-0.0488531	2.63738	2.80385	2.85738	2.45681	2.68055	Autophagy	0	93	XP_018563601.1	WD repeat domain phosphoinositide-interacting protein 3	0	99.13
JPS_TRINITY_DN7214_c0_g1	1170	-0.910735	6.22356	6.54601	3.40749	5.18682	6.44531	beta Glucan Binding Proteins	1.54814e-174	77.23	JAB65574.1	Beta-1,3-glucan-binding protein	0	90.81
JPS_TRINITY_DN2475_c0_g2	1392	3.76378	3.60193	2.97233	7.83823	7.09213	5.39276	beta Glucan Binding Proteins	0	68.83	XP_018563525.1	beta-1,3-glucan-binding protein-like	0	91.14
JPS_TRINITY_DN8099_c1_g1	1455	0.516883	2.60265	2.30801	2.6638	3.26529	2.94729	beta Glucan Binding Proteins	1.09824e-159	67.21	XP_018563524.1	beta-1,3-glucan-binding protein-like	0	88.02
JPS_TRINITY_DN7462_c0_g1	1308	0.823423	2.11003	0.325386	2.02361	1.66448	2.91629	beta Glucan Binding Proteins	2.50106e-102	58.69	XP_018563504.1	beta-1,3-glucan-binding protein 1	0	90.34
JPS_TRINITY_DN24512_c0_g1	3969	-0.93969	2.22928	2.44731	1.72727	1.22712	1.18903	Caspase Activators	1.76789e-163	50.07	XP_018564158.1	apoptotic protease-activating factor 1 isoform X1	0	93.5
JPS_TRINITY_DN19274_c0_g1	10680	1.09258	0.730314	-1.3474	1.47197	1.02077	0.816395	Caspases	0	52.77	XP_023310422.1	midasin	0	93.39
JPS_TRINITY_DN16207_c0_g1	1821	-0.430204	1.06212	-0.662004	-1.02621	0.371838	0.313826	Caspases	1.46845e-131	67.34	XP_018561636.1	high-affinity choline transporter 1	0	98.79
JPS_TRINITY_DN5889_c0_g1	969	-0.592769	4.02698	4.43883	3.7253	3.85778	3.3307	Caspases	8.36068e-133	75.83	XP_018567794.1	caspase-1	0	96.88
JPS_TRINITY_DN3471_c0_g1	723	0.395544	3.94082	4.38743	4.99177	4.55649	4.02228	Caspases	4.31217e-151	96.51	XP_018578264.1	DCN1-like protein 4 isoform X1	4.35298e-166	99.58
JPS_TRINITY_DN5698_c0_g1	1845	1.83689	2.49646	0.867896	3.88869	3.90285	3.35727	Caspases	8.55369e-160	63.04	XP_018561308.1	caspase-8	0	86.72
JPS_TRINITY_DN2477_c0_g1	1512	-0.846409	8.26564	7.7674	6.77739	6.8139	7.75694	Catalases	0	81.26	XP_018567821.1	catalase	0	97.42
JPS_TRINITY_DN19448_c0_g2	1524	-1.30485	1.15186	-0.477944	-1.80591	-1.04394	0.0200577	Catalases	0	82.8	XP_018568973.1	catalase-like	0	97.04
JPS_TRINITY_DN4394_c0_g1	1188	0.208702	7.31059	7.12466	7.4982	7.01414	7.69375	Clip-Domain Serine Proteases	2.74343e-129	71.98	XP_018561637.1	tryptase alpha/beta-1	0	88.34
JPS_TRINITY_DN7756_c0_g1	1302	0.334436	7.18203	7.16966	7.65671	7.42293	7.43924	Clip-Domain Serine Proteases	3.17738e-117	56.25	XP_018561290.1	uncharacterized protein LOC108903548	0	93.53
JPS_TRINITY_DN21519_c0_g1	1437	5.05528	1.98586	-1.08009	6.87571	5.75828	5.6318	Clip-Domain Serine Proteases	2.65313e-116	72	XP_018561290.1	uncharacterized protein LOC108903548	0	82.41
JPS_TRINITY_DN11810_c0_g1	1131	0.13493	0.0676387	0.413594	0.423309	0.535058	0.176323	Clip-Domain Serine Proteases	2.75749e-133	67.73	XP_018561637.1	tryptase alpha/beta-1	0	79.35
JPS_TRINITY_DN10358_c0_g1	1212	0.767442	3.587	3.64155	4.43403	4.07707	4.58832	Clip-Domain Serine Proteases	2.6542e-150	76.4	XP_018578841.1	serine protease snake-like	0	92.14
JPS_TRINITY_DN83348_c0_g1	1302	-0.283238	-0.756331	-2.32916	-1.8625	-3.44222	-0.717857	Clip-Domain Serine Proteases	0	90.88	XP_028135685.1	uncharacterized protein LOC114330529 isoform X2	0	89.82
JPS_TRINITY_DN17657_c1_g2	1095	-0.787786	1.70885	-0.0320936	-0.657445	0.22404	0.916859	Clip-Domain Serine Proteases	0	87.78	XP_015837075.1	uncharacterized protein LOC662737	0	87.78
JPS_TRINITY_DN843_c0_g1	1188	1.11824	3.45759	3.62492	5.23615	3.86651	4.56487	Clip-Domain Serine Proteases	3.31939e-137	65.72	XP_018568472.1	serine protease easter-like	0	80
JPS_TRINITY_DN316_c1_g2	1179	0.677282	3.73357	3.36289	4.50398	4.06936	4.09651	Clip-Domain Serine Proteases	2.59139e-121	62.83	XP_018568809.1	serine protease 7-like	0	93.62
JPS_TRINITY_DN2443_c0_g1	1251	6.11736	1.85519	-1.26188	8.08834	7.02892	4.1235	Clip-Domain Serine Proteases	4.90453e-103	62.3	XP_018569134.1	melanization protease 1-like	0	90.21
JPS_TRINITY_DN17788_c0_g2	1524	-0.260966	4.75018	4.85793	2.08202	4.40919	5.47599	C-Type Lectins	1.64344e-161	65.24	XP_018573214.1	myrosinase 1	0	94.31
JPS_TRINITY_DN184_c0_g1	1488	-0.204243	5.03997	5.10924	0.745022	0.725959	6.39994	C-Type Lectins	1.67817e-161	67.76	XP_018573206.1	myrosinase 1	0	95.76
JPS_TRINITY_DN2506_c0_g1	1506	-0.703633	5.65016	5.88716	4.04194	4.2322	6.0334	C-Type Lectins	1.03447e-158	64.23	JAB64911.1	Myrosinase 1	0	95.77
JPS_TRINITY_DN3769_c0_g1	1479	-1.01255	2.90574	1.62621	-0.171368	-2.6529	2.76977	C-Type Lectins	2.00934e-157	65.21	XP_018567960.1	myrosinase 1-like	0	93.67
JPS_TRINITY_DN3124_c0_g1	1482	0.165514	3.33785	4.29006	1.06833	1.16414	5.51046	C-Type Lectins	1.26606e-156	67.74	XP_023311344.1	lactase-phlorizin hydrolase-like	0	91.48
JPS_TRINITY_DN2763_c0_g1	1485	-0.781021	4.87007	4.45713	-3.08314	1.86037	5.3559	C-Type Lectins	1.3111e-151	64.98	XP_023312869.1	myrosinase 1	0	92.9
JPS_TRINITY_DN9554_c0_g1	1518	-1.31956	-1.5951	1.44308	-1.662	-0.529073	-0.279284	C-Type Lectins	3.90275e-150	63.95	XP_018567975.1	lactase-like protein	0	87.85
JPS_TRINITY_DN2888_c0_g1	1518	1.05391	4.5784	4.55281	5.59072	5.22701	5.95073	C-Type Lectins	3.68128e-144	63.89	XP_018570324.1	myrosinase 1-like	0	93.93
JPS_TRINITY_DN21914_c0_g2	1509	-0.202812	2.95233	2.6837	0.380729	1.13422	3.90342	C-Type Lectins	1.53087e-142	61.48	XP_018576585.1	myrosinase 1	0	84.26
JPS_TRINITY_DN2458_c0_g1	1482	0.00890116	2.37379	2.48259	1.98514	1.94486	3.07878	C-Type Lectins	2.27376e-142	62.69	XP_018565422.1	myrosinase 1	0	94.08
JPS_TRINITY_DN1707_c0_g2	1482	3.64444	3.40871	4.01266	5.59222	8.44379	6.72144	C-Type Lectins	3.4278e-141	64.53	XP_018565439.1	myrosinase 1-like	0	95.54
JPS_TRINITY_DN3129_c0_g1	1509	-0.866937	4.5579	6.23791	1.22897	1.7137	6.24456	C-Type Lectins	3.70722e-140	62.25	XP_018576585.1	myrosinase 1	0	96.41
JPS_TRINITY_DN4045_c0_g1	1527	-0.818344	5.05554	5.35378	1.97783	3.24077	5.63465	C-Type Lectins	1.37894e-137	60.95	JAB66406.1	Myrosinase, partial	0	92.73
JPS_TRINITY_DN10256_c0_g1	1506	-0.422105	2.52507	1.99132	-0.407364	0.994942	3.02645	C-Type Lectins	1.59213e-135	62.2	XP_019881534.1	uncharacterized protein LOC109609325	0	84.33
JPS_TRINITY_DN6531_c0_g1	1479	1.53248	2.8213	1.54399	3.584	3.40218	4.37567	C-Type Lectins	2.42419e-135	62.04	XP_018571866.1	myrosinase 1-like isoform X2	0	95.8
JPS_TRINITY_DN5439_c1_g1	1251	-1.69792	1.31092	0.612588	-2.79586	-2.63487	0.631337	C-Type Lectins	2.77652e-135	68.45	XP_018573475.1	myrosinase 1-like	0	86.02
JPS_TRINITY_DN9908_c0_g1	1479	-0.814834	2.92201	3.02112	0.922198	0.43082	3.34227	C-Type Lectins	9.35294e-134	61.34	XP_018573700.1	myrosinase 1	0	93.06
JPS_TRINITY_DN11106_c0_g1	1509	-0.275163	7.56934	6.35775	6.0323	6.6977	7.39087	C-Type Lectins	4.61817e-130	62.85	ATY36713.1	Cellulase	0	99.6
JPS_TRINITY_DN8569_c0_g1	1518	-0.243614	2.87931	3.60312	2.2969	2.60999	3.776	C-Type Lectins	2.79327e-129	62.58	XP_018568760.1	myrosinase 1-like isoform X1	0	94.29
JPS_TRINITY_DN9908_c0_g3	1476	-0.991234	6.34903	5.74201	1.13488	1.80612	6.58799	C-Type Lectins	2.82035e-124	59.79	XP_018573700.1	myrosinase 1	0	84.91
JPS_TRINITY_DN1408_c0_g1	1671	0.677262	4.37086	4.59252	5.78639	4.457	4.92329	C-Type Lectins	1.35266e-120	59.84	XP_018565434.1	myrosinase 1	0	92.76
JPS_TRINITY_DN591_c0_g1	1269	-1.36876	7.88846	8.89155	4.37016	5.39383	8.45433	C-Type Lectins	1.05426e-113	62.25	XP_018568748.1	myrosinase 1-like	0	94.84
JPS_TRINITY_DN8408_c0_g1	1551	-1.03432	1.27501	1.79286	0.303342	-0.190997	1.1375	C-Type Lectins	3.6946e-106	58.15	JAB64119.1	Myrosinase 1	0	87.07
JPS_TRINITY_DN23885_c0_g1	1557	0.131177	2.86967	3.09018	2.79119	3.23189	3.27501	C-Type Lectins	5.3542e-105	57.67	JAB64119.1	Myrosinase 1	0	87.2
JPS_TRINITY_DN27954_c0_g1	1572	-0.371773	0.668119	1.6036	1.2135	-1.64386	1.44679	C-Type Lectins	1.66987e-103	57.88	XP_018565428.1	myrosinase 1-like	0	83.78
JPS_TRINITY_DN13568_c0_g1	2121	-0.0556093	4.14592	2.9668	2.72028	0.343692	4.85674	C-Type Lectins	0	87.2	XP_018565850.1	sushi, von Willebrand factor type A, EGF and pentraxin domain-containing protein 1	0	98.87
JPS_TRINITY_DN3144_c0_g1	525	1.22903	6.39565	7.22969	8.30691	8.21939	7.70767	C-Type Lectins	1.39468e-121	98.85	XP_018565843.1	myosin regulatory light chain sqh	4.48876e-125	99.43
JPS_TRINITY_DN51571_c0_g3	1107	-1.078	-2.06492	-1.0499	-3.59074	-2.74662	-1.83136	C-Type Lectins	0	96.19	XP_018571372.1	uncharacterized protein LOC108911033	0	99.46
JPS_TRINITY_DN4526_c0_g1	1572	0.560403	3.17903	2.27858	3.69466	2.92448	3.35431	C-Type Lectins	1.20296e-138	77.45	XP_023012915.1	serine protease gd-like isoform X2	0	69.77
JPS_TRINITY_DN3718_c0_g1	1323	0.672729	2.21661	1.8127	2.25912	2.63831	3.08763	C-Type Lectins	5.56435e-101	54.14	XP_018571193.1	limulus clotting factor C-like isoform X1	0	81.91
JPS_TRINITY_DN3082_c0_g1	561	-2.47702	3.35783	3.40245	-0.0923402	-0.26708	1.94186	C-Type Lectins	4.92394e-114	93.96	XP_018577882.1	C-type lectin 37Db-like	1.10353e-126	98.92
JPS_TRINITY_DN85046_c0_g1	654	-1.36889	3.4948	3.84187	2.38709	1.5955	2.72727	C-Type Lectins	9.23867e-158	97.7	XP_018574585.1	uncharacterized protein LOC108913514	6.53154e-162	99.54
JPS_TRINITY_DN23953_c0_g1	972	1.26101	2.07039	-0.405451	1.64801	2.89937	2.8516	C-Type Lectins	5.44202e-109	71	XP_018567377.1	uncharacterized protein LOC108907976	0	94.98
JPS_TRINITY_DN673_c0_g1	702	-2.50059	6.24108	6.74452	3.54201	2.30451	4.99467	C-Type Lectins	3.27847e-152	96.26	XP_018564317.1	uncharacterized protein LOC108905782	1.65144e-159	99.14
JPS_TRINITY_DN83710_c0_g1	1299	-0.0111094	-0.168123	-3.92139	-1.39973	-1.02327	-0.85726	C-Type Lectins	0	78.89	XP_008193737.1	uncharacterized protein LOC103313112	0	78.89
JPS_TRINITY_DN6690_c0_g1	1677	1.60662	3.06108	2.23481	4.7812	3.79732	4.18801	C-Type Lectins	1.56753e-125	55.96	XP_018579158.1	serine protease gd-like	0	93.92
JPS_TRINITY_DN15762_c0_g1	1461	0.436154	1.59598	1.93621	2.09255	1.9486	2.53032	C-Type Lectins	3.06592e-110	57.35	XP_018579160.1	serine protease gd	0	93.06
JPS_TRINITY_DN1553_c0_g1	11745	0.924731	3.76214	2.14991	3.73682	4.27754	4.21304	Fibrinogen Related Proteins	0	54.31	XP_018579127.1	hemocytin isoform X1	0	92.2
JPS_TRINITY_DN11216_c0_g1	1251	0.704975	1.77019	0.54498	2.32366	2.19975	1.20664	Fibrinogen Related Proteins	1.31973e-155	69.62	XP_018569009.1	tRNA dimethylallyltransferase	0	94.47
JPS_TRINITY_DN615_c0_g1	4395	0.337044	4.19582	2.28274	3.9365	3.16269	4.29844	Fibrinogen Related Proteins	0	77.85	XP_018579561.1	ALK tyrosine kinase receptor isoform X2	0	95.9
JPS_TRINITY_DN21735_c0_g2	1260	-0.413053	-0.115597	-2.2723	-2.22432	-0.650635	-1.24469	Fibrinogen Related Proteins	0	81.62	XP_018571500.1	protein scabrous	0	96.42
JPS_TRINITY_DN9967_c0_g1	1350	-0.480852	2.21257	2.36373	0.908429	1.35389	2.60431	Fibrinogen Related Proteins	1.53179e-141	66.07	XP_018564022.1	angiopoietin-related protein 7-like	0	87.05
JPS_TRINITY_DN29233_c0_g3	744	-1.87148	0.24123	0.414677	-2.26534	-3.02327	-0.514573	Fibrinogen Related Proteins	3.32377e-135	85.02	XP_018564036.1	connective tissue growth factor	2.07652e-175	99.6
JPS_TRINITY_DN17718_c0_g1	1635	-1.14635	1.0895	-0.293359	-1.24469	-1.94898	0.393965	Fibrinogen Related Proteins	0	89.25	XP_018569893.1	angiopoietin-2-like isoform X1	0	99.61
JPS_TRINITY_DN1484_c0_g1	3618	1.25953	2.53879	0.316146	3.21723	3.23695	2.72509	Fibrinogen Related Proteins	0	96.4	XP_018570382.1	RNA polymerase-associated protein CTR9 homolog isoform X1	0	99.35
JPS_TRINITY_DN1199_c0_g1	678	-0.163082	6.33378	6.69262	6.3846	6.35836	6.34044	Fibrinogen Related Proteins	1.02849e-135	93.75	XP_018579979.1	proteasome subunit beta type-6	4.95268e-151	99.12
JPS_TRINITY_DN2340_c0_g1	1887	1.21791	3.0844	-4.53952	2.54052	3.49787	3.65878	Fibrinogen Related Proteins	1.5284e-166	61.94	XP_018573011.1	cilia- and flagella-associated protein 206-like	0	92.8
JPS_TRINITY_DN1563_c0_g2	6735	2.14022	5.54936	3.86275	7.52055	7.16499	6.2989	Galectins	0	79.29	XP_018565671.1	filamin-A isoform X1	0	99.15
JPS_TRINITY_DN10478_c0_g2	4038	-1.40993	4.61724	3.94823	2.76362	2.34823	3.41752	Galectins	0	93.67	XP_018570940.1	filamin-A isoform X1	0	99.03
JPS_TRINITY_DN4073_c0_g1	2505	-0.433854	2.51096	2.04789	1.76086	1.92903	1.89685	Galectins	0	86.95	XP_018569623.1	tectonin beta-propeller repeat-containing protein isoform X1	0	98.08
JPS_TRINITY_DN2099_c0_g1	600	0.396787	6.53745	7.26415	7.02778	7.78715	7.08369	Glutathione Peroxidases	3.72401e-120	88.44	XP_018566914.1	glutathione peroxidase-like	9.754e-137	96.04
JPS_TRINITY_DN35753_c0_g1	582	-0.281355	6.27428	5.8938	5.21921	6.24764	5.79906	Glutathione Peroxidases	2.98097e-108	81.41	XP_018566915.1	glutathione peroxidase-like	1.43043e-133	96.89
JPS_TRINITY_DN1347_c0_g1	4935	3.41546	2.51879	0.415759	5.55056	5.50316	4.38198	Heme Peroxidases	0	57.42	XP_018566718.1	dual oxidase 2-like	0	93.66
JPS_TRINITY_DN2037_c0_g1	2004	0.0735822	3.87401	2.95513	2.4769	3.01275	4.44274	Heme Peroxidases	0	79.57	XP_018570827.1	peroxidase-like	0	92.07
JPS_TRINITY_DN5013_c0_g1	2418	-3.04173	-1.53533	3.35219	-1.22769	-0.0558912	-0.905088	Heme Peroxidases	0	78.46	XP_023311319.1	chorion peroxidase	0	92.14
JPS_TRINITY_DN2413_c0_g1	4332	0.164858	4.68667	4.47554	4.69599	3.92458	5.30783	Heme Peroxidases	0	84.14	JAB64079.1	Peroxidasin	0	97
JPS_TRINITY_DN78345_c0_g1	4509	0.160808	0.85599	0.725087	1.41576	0.669934	0.630405	Heme Peroxidases	0	94.79	XP_018563303.1	dual oxidase	0	99.27
JPS_TRINITY_DN25284_c0_g1	2379	0.407849	-0.508403	-1.72261	-0.384584	-0.798366	-0.597278	Heme Peroxidases	0	71.16	XP_023309880.1	myeloperoxidase	0	91.23
JPS_TRINITY_DN5961_c0_g1	4185	-0.510427	2.91648	2.72552	2.8512	1.52957	2.26664	Heme Peroxidases	0	85.86	XP_018561865.2	uncharacterized protein LOC108903983	0	98.27
JPS_TRINITY_DN22607_c0_g1	2337	-2.82696	2.45418	2.20038	-1.72738	-1.88897	0.639695	Heme Peroxidases	0	89.02	XP_018570579.1	peroxidase, partial	0	98.41
JPS_TRINITY_DN20843_c0_g1	4197	-1.0553	1.1177	-0.859876	-0.675765	-0.85726	-0.347399	Heme Peroxidases	0	86.44	XP_018575206.1	uncharacterized protein LOC108913999	0	89.77
JPS_TRINITY_DN3896_c0_g1	2133	1.2653	1.71414	1.75403	3.20414	2.8127	2.9542	IMD Pathway Members	0	65.68	XP_018575127.1	inhibitor of nuclear factor kappa-B kinase subunit alpha-like isoform X1	0	94.65
JPS_TRINITY_DN3426_c0_g1	1995	1.55116	2.42169	0.970117	3.55594	3.68111	2.92144	IMD Pathway Members	0	86.04	XP_018578117.1	FAS-associated factor 1	0	99.1
JPS_TRINITY_DN3275_c0_g1	429	1.63776	3.65695	2.77104	5.08057	5.1865	4.35664	IMD Pathway Members	1.0506e-21	71.7	XP_018561259.1	mitogen-activated protein kinase kinase kinase 7	1.49126e-64	93.57
JPS_TRINITY_DN1824_c0_g1	1545	0.83975	4.01846	3.60656	4.5846	4.91016	4.46897	Inhibitors of Apoptosis	0	75.34	XP_018570258.1	baculoviral IAP repeat-containing protein 7-B	0	95.92
JPS_TRINITY_DN11802_c1_g1	690	1.07343	3.16076	3.66789	4.45543	4.76256	4.26813	Inhibitors of Apoptosis	4.6476e-113	92.61	JAB61510.1	Viral IAP-associated factor	1.366e-127	98.25
JPS_TRINITY_DN3064_c0_g1	744	2.25725	3.27143	1.09288	4.2114	5.22874	4.8338	Inhibitors of Apoptosis	3.51079e-112	85.08	XP_018578526.1	thioredoxin domain-containing protein 9	1.14336e-132	95.95
JPS_TRINITY_DN2201_c0_g1	13074	-0.534428	3.95373	3.31846	3.00198	3.13455	3.26093	Inhibitors of Apoptosis	0	78.43	XP_023309719.1	baculoviral IAP repeat-containing protein 6 isoform X1	0	98.51
JPS_TRINITY_DN1724_c0_g1	3231	0.518205	4.57337	2.78136	3.60146	4.6975	4.79857	Inhibitors of Apoptosis	0	73.02	XP_018566113.1	(E3-independent) E2 ubiquitin-conjugating enzyme UBE2O	0	97.96
JPS_TRINITY_DN6993_c0_g1	2877	1.06923	0.848798	0.740712	1.80116	2.1107	1.64339	Inhibitors of Apoptosis	0	83.15	XP_018562403.1	syndetin	0	99.06
JPS_TRINITY_DN5026_c0_g1	3276	-0.226343	3.29352	2.99838	2.92979	2.98076	2.86869	JAK/STAT Pathway Members	0	67.17	XP_018575344.1	tyrosine-protein kinase hopscotch	0	94.78
JPS_TRINITY_DN1489_c0_g1	3516	0.806023	4.87843	4.316	5.95522	4.99571	5.14682	JAK/STAT Pathway Members	0	59.55	XP_018565709.1	cytokine receptor	0	89.09
JPS_TRINITY_DN191_c0_g2	2331	-0.268859	5.616	5.12697	5.54312	4.79981	4.91073	JAK/STAT Pathway Members	0	91.7	JAB64065.1	Signal transducer and activator of transcription 5B	0	97.69
JPS_TRINITY_DN131318_c0_g1	1590	2.00859	3.42559	2.19503	4.91886	5.21634	4.64766	JAK/STAT Pathway Members	0	85.57	JAB62979.1	Signal transducing adapter molecule 1	0	96.2
JPS_TRINITY_DN1676_c2_g1	3423	0.419652	3.32294	0.298658	3.43656	2.71743	2.36233	MD2-Like Receptors	1.0478e-110	82.22	XP_018570914.1	titin isoform X3	0	89.77
JPS_TRINITY_DN5521_c0_g1	3231	1.13503	1.16543	-0.120294	1.72421	2.32222	1.08066	MD2-Like Receptors	0	76.91	XP_018573771.1	uncharacterized protein LOC108912850 isoform X4	0	97.12
JPS_TRINITY_DN104_c0_g1	1419	-0.154915	6.62984	3.4079	5.8525	4.94622	5.88548	MD2-Like Receptors	0	78.94	XP_022909573.1	uncharacterized protein LOC111420769	0	86.19
JPS_TRINITY_DN1692_c0_g1	2142	5.42449	-0.450084	-1.55639	4.24732	5.56371	1.46937	Prophenoioxidases	4.08531e-170	60.51	JAB63602.1	Hexamerin-1.1	0	95.27
JPS_TRINITY_DN158_c0_g1	2073	0.99554	7.7335	7.49494	8.56655	8.78337	8.47669	Prophenoioxidases	0	82.55	XP_023309916.1	uncharacterized protein LOC108904736	0	95.12
JPS_TRINITY_DN108832_c0_g1	2085	-2.39555	6.21645	5.12031	-0.880976	-1.09851	4.91188	Prophenoioxidases	0	74.26	JAB65032.1	Phenoloxidase subunit A3	0	93.94
JPS_TRINITY_DN14981_c0_g1	2724	0.968278	4.84474	4.12854	5.70244	5.69338	4.99295	Relish-like Proteins	0	64.81	XP_018565823.1	nuclear factor NF-kappa-B p110 subunit isoform X1	0	92.86
JPS_TRINITY_DN5468_c0_g1	8877	0.290067	1.5568	0.344828	1.75189	0.863938	1.34312	Scavenger Receptors Class A	0	84.56	XP_018575313.1	protein bark beetle isoform X1	0	97.23
JPS_TRINITY_DN43190_c0_g1	690	-0.643112	-2.1976	0.563646	-1.11404	-3.87832	0.136191	Scavenger Receptors Class A	7.39749e-111	88.83	XP_028148550.1	tryptase-2-like, partial	8.76082e-115	98.35
JPS_TRINITY_DN85_c1_g1	1473	0.083581	1.94486	1.55041	2.15801	0.671746	2.23848	Scavenger Receptors Class A	0	84.49	XP_018564688.1	lysyl oxidase homolog 3-like	0	95.51
JPS_TRINITY_DN2489_c0_g1	4581	-0.0867468	4.56639	2.60905	3.53119	0.941858	4.83799	Scavenger Receptors Class A	0	77.75	XP_018571935.1	uncharacterized protein LOC108911476	0	86.68
JPS_TRINITY_DN16297_c0_g1	1611	-0.98942	2.97856	3.21428	2.02892	1.58304	2.55827	Scavenger Receptors Class B	1.99641e-178	70.79	XP_018561595.1	scavenger receptor class B member 1-like	0	95.9
JPS_TRINITY_DN56_c0_g2	1464	0.290774	4.04806	4.4695	4.7941	4.15032	4.67265	Scavenger Receptors Class B	1.59761e-160	72.39	XP_018572451.1	protein croquemort isoform X1	0	95.69
JPS_TRINITY_DN4230_c0_g1	1551	1.4539	3.47677	3.40013	5.35523	4.72416	4.44387	Scavenger Receptors Class B	8.12018e-145	64.4	JAB63926.1	Sensory neuron membrane protein 2	0	92.26
JPS_TRINITY_DN2951_c1_g1	1548	-1.33513	3.81435	4.57077	2.0165	2.7966	3.52344	Scavenger Receptors Class B	1.31704e-159	65.62	XP_018568074.1	protein peste-like isoform X1	0	93.48
JPS_TRINITY_DN667_c0_g1	1521	0.246537	5.61456	5.2824	5.69994	5.46689	5.91255	Scavenger Receptors Class B	0	77.8	XP_023313046.1	protein peste-like	0	95.45
JPS_TRINITY_DN10070_c0_g1	1713	-1.17108	2.77631	2.13816	0.809826	0.0717627	2.2302	Scavenger Receptors Class B	0	79.86	XP_018562638.1	scavenger receptor class B member 1-like isoform X1	0	94.05
JPS_TRINITY_DN2510_c0_g1	1686	-0.542178	4.37184	4.10735	2.90612	3.40108	4.39383	Scavenger Receptors Class B	9.27964e-165	67.27	XP_018567421.1	scavenger receptor class B member 1-like isoform X1	0	90.85
JPS_TRINITY_DN8433_c0_g1	1638	-0.149057	1.8339	1.37573	1.02077	0.893751	2.15251	Scavenger Receptors Class B	0	71.38	XP_018567423.1	scavenger receptor class B member 1-like isoform X1	0	93.93
JPS_TRINITY_DN2493_c0_g1	1665	-0.536651	4.55182	4.27277	3.59108	3.12961	4.55084	Scavenger Receptors Class B	0	88.15	XP_018563143.1	scavenger receptor class B member 1	0	97.47
JPS_TRINITY_DN5584_c0_g2	1188	1.08711	6.27715	6.08443	7.79625	7.00398	6.81701	Serine Protease Inhibitor	7.9705e-102	67.63	XP_018566251.1	antichymotrypsin-2-like	0	93.92
JPS_TRINITY_DN682_c0_g1	1188	0.772071	3.68415	1.56316	4.22435	3.64812	3.2121	Serine Protease Inhibitor	9.37996e-126	68.86	XP_018579755.1	serine protease inhibitor 3/4 isoform X8	0	83.59
JPS_TRINITY_DN2075_c0_g1	1164	0.947747	5.72293	3.43456	6.45725	6.35318	3.85579	Serine Protease Inhibitor	5.43967e-125	74.39	XP_018579758.1	serine protease inhibitor 3/4 isoform X12	0	85.75
JPS_TRINITY_DN682_c0_g2	1164	0.471538	2.99838	1.20914	2.85559	2.79597	2.85718	Serine Protease Inhibitor	3.65002e-120	69.71	XP_018579758.1	serine protease inhibitor 3/4 isoform X12	2.20212e-180	81.35
JPS_TRINITY_DN182_c0_g1	1278	1.51606	5.56016	5.68246	7.35993	6.99577	7.03174	Serine Protease Inhibitor	1.77858e-160	78.27	XP_018578712.1	serine protease inhibitor 27A-like isoform X1	0	96.54
JPS_TRINITY_DN6073_c0_g1	1389	1.30908	3.31846	3.88284	5.0947	4.65581	5.02365	Serine Protease Inhibitor	8.4183e-101	64.94	XP_018571319.1	uncharacterized protein LOC108910995	0	88.99
JPS_TRINITY_DN4921_c2_g1	1626	0.783031	4.49076	3.968	5.45832	4.54473	4.95963	Serine Protease Inhibitor	0	73.75	XP_018573796.1	serine protease inhibitor 28Dc-like	0	92.65
JPS_TRINITY_DN22809_c0_g1	1254	1.51721	4.6227	4.76336	6.46156	6.0843	6.0532	Serine Protease Inhibitor	0	77.05	XP_018579835.1	serine protease inhibitor 88Ea-like isoform X1	0	98.55
JPS_TRINITY_DN2194_c0_g1	1218	3.10395	3.65386	2.32769	7.12637	5.42099	5.47599	Serine Protease Inhibitor	9.37503e-138	70.13	XP_018569245.1	serine protease inhibitor 77Ba	0	90.62
JPS_TRINITY_DN25241_c0_g1	5550	-0.171588	-0.0816138	0.528071	0.655352	-0.129734	-0.535332	Small RNA Regulatory Pathway Members	0	67.14	XP_018576096.1	endoribonuclease Dcr-1	0	96.98
JPS_TRINITY_DN3252_c0_g1	2685	-0.456227	3.7632	3.72792	3.47366	2.93847	3.40013	Small RNA Regulatory Pathway Members	0	63.82	XP_018580188.1	putative helicase mov-10-B.1	0	88.83
JPS_TRINITY_DN19053_c0_g1	2433	1.02447	0.97159	0.280956	2.21785	1.29748	1.36793	Small RNA Regulatory Pathway Members	0	75.4	XP_018573469.1	endoribonuclease Dicer	0	94.57
JPS_TRINITY_DN3127_c0_g1	2712	0.556134	5.51295	4.70752	5.72339	5.507	5.90749	Small RNA Regulatory Pathway Members	0	89.92	XP_018575956.1	staphylococcal nuclease domain-containing protein 1	0	97.79
JPS_TRINITY_DN1458_c0_g1	2262	0.0324464	6.49256	5.62647	6.00282	5.7558	6.58144	Small RNA Regulatory Pathway Members	0	81.31	XP_018575591.1	double-stranded RNA-binding protein Staufen homolog 2	0	98.28
JPS_TRINITY_DN6294_c0_g1	1137	-2.21158	5.19279	6.33669	3.33557	3.80426	3.80261	Small RNA Regulatory Pathway Members	0	100	XP_018574614.1	protein argonaute-2 isoform X2	0	100
JPS_TRINITY_DN20212_c0_g1	2577	0.596835	2.35445	2.16124	2.88772	3.05033	2.60027	Small RNA Regulatory Pathway Members	0	74.46	XP_018573756.1	piwi-like protein Ago3	0	94.3
JPS_TRINITY_DN1619_c0_g1	2718	-0.406357	5.11591	5.42193	5.05858	4.76304	4.77025	Small RNA Regulatory Pathway Members	0	80.45	XP_018561760.1	piwi-like protein Siwi	0	96.15
JPS_TRINITY_DN893_c0_g1	1155	-1.20639	4.07142	4.55195	3.27917	2.62012	3.36737	Small RNA Regulatory Pathway Members	0	87.54	XP_028143662.1	RISC-loading complex subunit tarbp2-like isoform X1	0	90.31
JPS_TRINITY_DN5860_c0_g1	4410	1.49628	1.41197	-0.0335695	2.42519	2.23726	2.40844	Small RNA Regulatory Pathway Members	0	64.05	XP_023312086.1	probable ATP-dependent RNA helicase spindle-E	0	94.31
JPS_TRINITY_DN19167_c0_g1	1701	0.705553	0.6107	-1.77103	0.574344	0.658097	0.469886	Small RNA Regulatory Pathway Members	0	84.98	XP_018572010.1	microprocessor complex subunit DGCR8	0	97.17
JPS_TRINITY_DN2486_c0_g1	705	0.696414	4.10089	3.62515	5.08074	4.47041	3.97187	Spaetzle-like Proteins	7.842e-124	89.09	XP_018561823.2	protein spaetzle 3	6.06303e-158	97.73
JPS_TRINITY_DN7076_c0_g1	1071	-1.04322	2.60739	2.12201	1.11902	0.701327	1.92828	Spaetzle-like Proteins	1.0363e-118	67.54	XP_018568892.1	protein spaetzle 5	0	95.84
JPS_TRINITY_DN6068_c0_g1	645	-0.503161	5.78957	6.59997	5.67223	5.52384	6.00455	Superoxide Dismutases	1.57431e-110	85.05	XP_018577318.1	superoxide dismutase [Mn] 1, mitochondrial	5.07236e-138	97.2
JPS_TRINITY_DN28688_c0_g1	702	-1.1242	0.769772	1.59979	-0.274041	-0.734563	0.872632	Superoxide Dismutases	1.42748e-108	81.36	XP_018573175.1	superoxide dismutase [Cu-Zn]-like	2.9826e-151	94.87
JPS_TRINITY_DN26877_c0_g1	3426	-0.495864	1.98003	0.770618	0.397255	1.16993	1.28924	Superoxide Dismutases	0	87.11	XP_018567950.1	uncharacterized protein LOC108908397	0	97.19
JPS_TRINITY_DN5615_c0_g1	4434	0.234597	3.23511	2.15607	2.82538	2.68796	3.45312	Thioester-Containing Proteins	0	83.93	XP_018579792.1	CD109 antigen-like isoform X1	0	96.34
JPS_TRINITY_DN22183_c0_g1	1641	-2.0384	1.18333	-0.129734	-0.547932	-2.08927	-2.03505	Thioredoxin Peroxidases	1.4424e-135	62.52	KYN01121.1	hypothetical protein	8.58343e-170	67.22
JPS_TRINITY_DN10449_c0_g1	756	-0.599937	5.13393	5.74149	4.88757	4.5864	5.0906	Thioredoxin Peroxidases	2.05362e-152	90.83	XP_018575492.1	peroxiredoxin-4	2.31683e-179	98.77
JPS_TRINITY_DN31780_c0_g1	672	0.897674	1.66312	0.464668	1.96901	1.91073	2.33113	Thioredoxin Peroxidases	8.66988e-134	89.55	XP_018580062.1	peroxiredoxin-6	7.89884e-153	96.86
JPS_TRINITY_DN75622_c0_g2	702	1.15687	5.37674	4.96218	6.27852	6.36431	6.37865	Thioredoxin Peroxidases	4.946e-135	86.64	XP_018578437.1	peroxiredoxin-1	2.96225e-156	95.26
JPS_TRINITY_DN109483_c0_g1	660	-0.106868	5.39934	5.01082	4.58093	5.30151	5.3336	Thioredoxin Peroxidases	9.51057e-133	88.58	XP_018569307.1	peroxiredoxin-6	2.62516e-148	94.52
JPS_TRINITY_DN46541_c0_g2	591	-1.53056	8.63552	9.38898	7.89393	7.24745	7.36451	Thioredoxin Peroxidases	3.77577e-124	89.8	XP_018565888.1	peroxiredoxin 1	6.5347e-136	97.45
JPS_TRINITY_DN7956_c1_g1	1404	-1.35212	2.36541	3.87086	2.02041	1.81065	2.02112	Toll pathway members	0	84.26	XP_018561458.1	TNF receptor-associated factor 4 isoform X1	0	99.79
JPS_TRINITY_DN27037_c0_g2	1203	0.675101	4.09609	4.07767	5.13926	4.7105	4.3202	Toll pathway members	7.72046e-125	66.67	XP_018571849.1	NF-kappa-B inhibitor cactus-like	0	93.78
JPS_TRINITY_DN3708_c0_g1	1110	2.61073	3.03896	2.91361	6.18749	5.68812	4.31477	Toll pathway members	3.4356e-104	66.97	XP_018578961.1	NF-kappa-B inhibitor cactus isoform X1	3.20974e-164	78.31
JPS_TRINITY_DN6412_c0_g1	1485	2.01504	1.29748	-1.55216	2.59503	3.06901	1.34255	Toll pathway members	1.5609e-122	72.46	XP_018573260.1	TNF receptor-associated factor 5 isoform X1	0	96.96
JPS_TRINITY_DN5008_c0_g1	2352	1.22658	2.04229	1.27381	2.681	3.25172	2.809	Toll pathway members	4.53859e-138	73.47	XP_018565585.1	probable LRR receptor-like serine/threonine-protein kinase At2g23950	0	90.94
JPS_TRINITY_DN120_c1_g1	1479	1.57289	2.61636	2.26364	4.20539	4.38038	3.25066	Toll pathway members	0	72.95	XP_018579614.1	serine/threonine-protein kinase pelle-like	0	98.37
JPS_TRINITY_DN2623_c0_g1	3117	0.826136	3.84006	3.41468	4.76001	4.66346	3.80808	Toll-like Receptors	0	61.37	XP_018565488.1	protein toll	0	92.23
JPS_TRINITY_DN5529_c0_g1	3930	-1.06026	2.96864	2.68167	2.02432	1.30159	1.89259	Toll-like Receptors	0	91.98	XP_018562143.1	toll-like receptor 7	0	99.69
JPS_TRINITY_DN13410_c1_g1	1362	-0.663174	-0.246395	-0.531156	-0.479955	-1.2969	-1.59946	Toll-like Receptors	0	92.94	XP_018578333.1	toll-like receptor 6	0	99.78
JPS_TRINITY_DN13410_c1_g2	2499	-1.12314	-0.584241	-1.64837	-1.92139	-2.27928	-2.25843	Toll-like Receptors	0	96.01	XP_018578333.1	toll-like receptor 6	0	99.16
JPS_TRINITY_DN61089_c0_g1	3738	-2.11806	1.85957	1.88479	-1.37333	-1.94898	0.914565	Toll-like Receptors	0	92.71	XP_018564342.1	toll-like receptor Tollo	0	99.44
JPS_TRINITY_DN8685_c0_g1	3969	-0.254209	2.02786	1.24853	1.20477	1.64339	1.42653	Toll-like Receptors	0	90.81	XP_018562934.1	toll-like receptor 6	0	98.87
*FC, fold change (Trt/Con)
*Con, Non-treated control
*Trt, Fungus-treatment
*rep, replicate

## Sheet: Immune_low_e-value
Supplimentary Table S7. List of immune-related genes in Japanese pine sawyer
Sequence_name	Length	Log2FC	Related immune	e-Value	sim mean	Gene ID	Description	e-Value	sim mean
JPS_TRINITY_DN13818_c0_g2	492	0.843164	Attacins	2.11385e-08	52.43	XP_018563820.1	attacin-C-like	2.33218e-85	90.18
JPS_TRINITY_DN4565_c0_g1	6375	0.467627	Autophagy	6.92404e-36	50.93	XP_018577044.1	uncharacterized protein LOC108915487	0	95.33
JPS_TRINITY_DN7103_c0_g1	1284	-0.594353	Autophagy	4.56289e-35	55.95	XP_018561130.1	serine/threonine-protein kinase Chk2-like isoform X1	0	89.74
JPS_TRINITY_DN5644_c0_g1	924	0.192329	Autophagy	1.96997e-24	45.1	XP_018576012.1	cyclin-dependent kinase 4	0	97.73
JPS_TRINITY_DN6146_c0_g1	1755	1.08443	Autophagy	4.99374e-18	49.77	XP_018564693.1	G protein-coupled receptor kinase 2	0	99.83
JPS_TRINITY_DN85236_c0_g1	1221	0.0905452	Autophagy	2.25266e-06	51.46	XP_018562622.1	WD repeat and FYVE domain-containing protein 2	0	99.51
JPS_TRINITY_DN6650_c1_g3	1683	0.363022	Autophagy	1.08893e-11	43.45	XP_018576095.1	TAF5-like RNA polymerase II p300/CBP-associated factor-associated factor 65 kDa subunit 5L	0	94.5
JPS_TRINITY_DN107781_c0_g1	1506	0.985409	Autophagy	2.47561e-09	44.19	XP_018577457.1	pre-mRNA-processing factor 19	0	100
JPS_TRINITY_DN3265_c0_g1	951	-0.423362	Autophagy	1.16664e-16	43.4	XP_018561569.1	WD repeat-containing protein 82	0	100
JPS_TRINITY_DN5480_c0_g1	978	1.20755	Autophagy	4.52643e-14	43.21	XP_008201452.1	WD repeat-containing protein 61	0	93.23
JPS_TRINITY_DN3269_c0_g1	1809	0.980653	Autophagy	1.80217e-08	42.47	XP_018561272.1	actin-interacting protein 1	0	98.67
JPS_TRINITY_DN5025_c0_g1	969	0.775101	Autophagy	2.709e-08	42.68	XP_018569497.1	THO complex subunit 3	0	99.07
JPS_TRINITY_DN1375_c0_g3	1044	0.613935	Autophagy	1.23301e-27	47.77	XP_018574105.1	U5 small nuclear ribonucleoprotein 40 kDa protein	0	97.69
JPS_TRINITY_DN4423_c0_g1	2814	0.924396	Autophagy	4.43536e-08	46.33	XP_018564738.1	WD repeat-containing protein 3 isoform X2	0	98.29
JPS_TRINITY_DN806_c3_g1	1782	-0.259389	Autophagy	3.16199e-19	48.61	XP_018566310.1	dual specificity tyrosine-phosphorylation-regulated kinase 4 isoform X2	0	98.99
JPS_TRINITY_DN3693_c0_g1	1668	-1.57649	Autophagy	6.12009e-19	47.17	XP_018578869.1	dual specificity tyrosine-phosphorylation-regulated kinase 2	0	99.1
JPS_TRINITY_DN603_c0_g1	1329	-0.419946	Autophagy	4.8207e-16	43.06	XP_018565342.1	WD repeat-containing protein 47 isoform X5	0	98.64
JPS_TRINITY_DN5735_c0_g1	2859	0.783471	Autophagy	2.50753e-08	40.72	XP_018569437.1	periodic tryptophan protein 2 homolog	0	98.34
JPS_TRINITY_DN3089_c0_g1	2451	0.528257	Autophagy	1.92179e-07	42.74	XP_018568693.1	cilia- and flagella-associated protein 52	0	92.05
JPS_TRINITY_DN2452_c0_g1	1368	-0.12813	Autophagy	1.75761e-14	38.49	XP_018575489.1	pleiotropic regulator 1	0	98.9
JPS_TRINITY_DN5350_c0_g1	1437	0.70637	Autophagy	9.53033e-12	39.58	XP_018575114.1	notchless protein homolog 1	0	97.91
JPS_TRINITY_DN7902_c0_g1	1566	0.873074	Autophagy	4.46758e-11	43.22	XP_018572561.1	U3 small nucleolar RNA-associated protein 15 homolog	0	95.78
JPS_TRINITY_DN5623_c0_g1	1290	1.13914	Autophagy	6.32305e-09	41.85	XP_019875274.1	probable histone-binding protein Caf1	0	99.07
JPS_TRINITY_DN3717_c0_g2	1554	-0.522592	Autophagy	7.14231e-15	46.21	XP_018580193.1	beta-TrCP isoform X3	0	99.42
JPS_TRINITY_DN1778_c0_g1	1074	0.141502	Autophagy	1.2564e-07	41.78	XP_018574778.1	mRNA export factor	0	98.32
JPS_TRINITY_DN75520_c0_g1	1923	0.653226	Autophagy	8.25729e-07	42.08	XP_018571615.1	protein lethal(2)denticleless	0	94.54
JPS_TRINITY_DN86701_c0_g1	1020	0.925194	Autophagy	2.64368e-20	49.11	XP_018567679.1	cyclin-dependent kinase 7	0	99.12
JPS_TRINITY_DN86701_c0_g2	1020	0.925194	Autophagy	2.64368e-20	49.11	XP_018567679.1	cyclin-dependent kinase 7	0	99.12
JPS_TRINITY_DN9097_c1_g1	573	1.01587	Autophagy	2.67834e-42	63.86	XP_023311773.1	ubiquitin-like-conjugating enzyme ATG10	1.44159e-95	94.52
JPS_TRINITY_DN2986_c1_g1	2043	-1.29331	Autophagy	7.58233e-39	54.63	XP_018567425.1	serine/threonine-protein kinase SIK3	0	97.77
JPS_TRINITY_DN2754_c0_g1	1023	1.39377	Autophagy	8.2061e-32	53.68	XP_018565552.1	testis-specific serine/threonine-protein kinase 3-like	0	96.26
JPS_TRINITY_DN1816_c0_g1	1557	-1.03272	Autophagy	3.36824e-23	52.09	XP_018575481.1	cyclin-dependent kinase 14 isoform X2	0	99.6
JPS_TRINITY_DN1284_c0_g1	2064	-0.382063	Autophagy	4.6566e-20	50.93	XP_023313123.1	G protein-coupled receptor kinase 1	0	99.85
JPS_TRINITY_DN8595_c0_g1	2601	1.07374	Autophagy	5.27283e-18	47.52	XP_018570557.1	serine/threonine-protein kinase prp4	0	94.39
JPS_TRINITY_DN818_c0_g1	1176	0.0373928	Autophagy	1.07445e-16	51.06	XP_018566732.1	casein kinase II subunit alpha isoform X1	0	100
JPS_TRINITY_DN16416_c0_g1	939	0.726035	Autophagy	7.07187e-17	44.52	XP_018568454.1	POC1 centriolar protein homolog A	0	93.91
JPS_TRINITY_DN1693_c0_g1	2700	0.816026	Autophagy	2.11735e-09	48.76	XP_018577902.1	coatomer subunit beta'	0	98.84
JPS_TRINITY_DN14698_c0_g1	2367	-1.31535	Autophagy	6.64533e-16	39.53	XP_018567391.1	katanin p80 WD40 repeat-containing subunit B1-like	0	98.22
JPS_TRINITY_DN3618_c0_g1	1086	1.26697	Autophagy	4.50543e-14	50	XP_018564072.1	casein kinase II subunit alpha isoform X1	0	98.52
JPS_TRINITY_DN1402_c1_g1	1701	0.160299	Autophagy	1.31523e-09	40.54	XP_018572721.1	WD repeat-containing protein 26	0	99.47
JPS_TRINITY_DN22801_c0_g1	2655	1.41679	Autophagy	2.25094e-07	37.76	XP_018573926.1	protein HIRA homolog	0	98.31
JPS_TRINITY_DN18167_c0_g1	384	1.05656	Autophagy	7.55425e-50	84.68	XP_018560932.1	autophagy-related protein 2 homolog A	1.10636e-68	97.64
JPS_TRINITY_DN1668_c0_g1	1086	0.439801	Autophagy	3.55442e-42	51.06	XP_018578858.1	calcium/calmodulin-dependent protein kinase type 1	0	100
JPS_TRINITY_DN2065_c0_g3	1452	0.549685	Autophagy	8.57147e-35	52.63	XP_023310898.1	ribosomal protein S6 kinase beta-1-like	0	99.59
JPS_TRINITY_DN2405_c0_g1	1092	1.3268	Autophagy	1.61945e-26	49.21	XP_018560846.1	testis-specific serine/threonine-protein kinase 1-like	0	96.69
JPS_TRINITY_DN1904_c0_g1	405	0.00728458	Autophagy	1.22237e-17	55.83	JAB66831.1	Serine/threonine-protein kinase	8.08692e-88	95.52
JPS_TRINITY_DN116_c1_g1	4218	0.17009	Autophagy	9.89754e-06	42.21	XP_018566785.1	mitogen-activated protein kinase-binding protein 1 isoform X1	0	99.21
JPS_TRINITY_DN1998_c0_g1	1029	0.285125	Autophagy	1.95451e-31	50	JAB66394.1	WD repeat-containing protein	0	99.13
JPS_TRINITY_DN1710_c0_g1	1533	0.542849	Autophagy	1.50667e-17	43.79	XP_018565318.1	WD40 repeat-containing protein SMU1	0	99.8
JPS_TRINITY_DN20383_c0_g1	915	0.820879	Autophagy	4.5788e-16	46.1	XP_018569641.1	WD repeat domain-containing protein 83-like	0	97.71
JPS_TRINITY_DN5670_c0_g1	2061	-0.557902	Autophagy	7.72381e-14	45.69	XP_018576618.1	F-box/WD repeat-containing protein 7	0	96.38
JPS_TRINITY_DN2652_c0_g1	981	-0.742248	Autophagy	2.24565e-12	42.51	XP_018562170.1	serine-threonine kinase receptor-associated protein	0	97.85
JPS_TRINITY_DN4308_c0_g1	1479	-0.711038	Autophagy	5.13616e-12	42.51	XP_018575424.1	F-box-like/WD repeat-containing protein TBL1XR1	0	99.59
JPS_TRINITY_DN3960_c0_g1	1728	0.722454	Autophagy	7.11049e-11	36.2	XP_018564939.1	pre-mRNA-processing factor 17	0	97.74
JPS_TRINITY_DN2779_c0_g1	3660	0.264827	Autophagy	2.13277e-10	49.58	XP_018573666.1	coatomer subunit alpha	0	99.43
JPS_TRINITY_DN12105_c0_g1	1014	-0.274031	Autophagy	2.399e-09	50	XP_018578230.1	probable cytosolic iron-sulfur protein assembly protein Ciao1	0	98.81
JPS_TRINITY_DN24410_c0_g1	4905	0.627331	Autophagy	3.87039e-09	38.94	XP_018564262.1	bromodomain and WD repeat-containing protein 3 isoform X1	0	94.07
JPS_TRINITY_DN2323_c0_g1	1440	-0.660257	Autophagy	4.26426e-09	44.07	XP_018577925.1	fizzy-related protein homolog	0	99.58
JPS_TRINITY_DN5121_c0_g1	2475	2.65731	Autophagy	1.06918e-06	40.89	XP_023311900.1	jouberin-like	0	88.62
JPS_TRINITY_DN229_c0_g2	2733	0.412443	Autophagy	6.99054e-31	52.76	XP_018563613.1	titin isoform X1	0	87
JPS_TRINITY_DN7617_c0_g1	2712	1.09533	Autophagy	3.835e-16	44.1	XP_018578917.1	eukaryotic translation initiation factor 2-alpha kinase	0	94.36
JPS_TRINITY_DN37358_c0_g1	1614	0.481442	Autophagy	2.32277e-14	42.37	XP_018563520.1	serine/threonine-protein kinase SBK1-like	0	96.66
JPS_TRINITY_DN21233_c0_g1	573	-2.3522	Autophagy	1.4609e-35	71.3	XP_018566205.1	microtubule-associated proteins 1A/1B light chain 3C-like isoform X2	8.56687e-102	95.81
JPS_TRINITY_DN2419_c0_g1	1074	-0.0124821	Autophagy	2.50431e-99	64.63	XP_018573877.1	WD repeat domain phosphoinositide-interacting protein 4	0	98.04
JPS_TRINITY_DN405_c1_g1	1776	0.183029	Autophagy	3.3634e-37	52.52	XP_018561124.1	ovarian-specific serine/threonine-protein kinase Lok-like isoform X1	0	88.32
JPS_TRINITY_DN5716_c0_g1	1035	1.05847	Autophagy	6.82272e-34	47.62	XP_018567334.1	testis-specific serine/threonine-protein kinase 2	0	99.71
JPS_TRINITY_DN23522_c0_g1	1719	-1.28186	Autophagy	5.13664e-33	51.1	XP_018560879.1	serine/threonine-protein kinase PAK mbt	0	99.48
JPS_TRINITY_DN15213_c0_g1	1776	-1.3691	Autophagy	2.49673e-29	48.93	XP_018562481.1	atypical protein kinase C	0	100
JPS_TRINITY_DN1272_c0_g1	1056	0.596083	Autophagy	2.18319e-22	51.85	XP_018573142.1	mitogen-activated protein kinase 14B	0	99.43
JPS_TRINITY_DN9877_c0_g1	1347	-1.61727	Autophagy	3.51771e-21	45.87	XP_971053.2	serine/threonine-protein kinase NLK isoform X2	0	97.32
JPS_TRINITY_DN10_c0_g1	363	0.988862	Autophagy	2.85042e-81	100	XP_018562557.1	gamma-aminobutyric acid receptor-associated protein	2.05701e-83	100
JPS_TRINITY_DN6261_c0_g1	1470	0.841527	Autophagy	2.18041e-34	52.55	XP_018575836.1	serine/threonine-protein kinase PAK 1	0	98.98
JPS_TRINITY_DN5835_c0_g1	1314	0.725636	Autophagy	2.31868e-12	59.04	XP_018566795.1	adenylyltransferase and sulfurtransferase MOCS3 isoform X1	0	91.84
JPS_TRINITY_DN8856_c0_g1	1332	0.942858	Autophagy	6.17039e-10	59.46	XP_018579192.1	NEDD8-activating enzyme E1 catalytic subunit	0	98.65
JPS_TRINITY_DN4026_c0_g1	1842	1.43621	Autophagy	4.66597e-09	57.83	XP_018571091.1	SUMO-activating enzyme subunit 2	0	97.55
JPS_TRINITY_DN2118_c0_g1	3126	0.226085	Autophagy	7.69944e-07	49.62	XP_018573299.1	ubiquitin-like modifier-activating enzyme 1 isoform X1	0	98.37
JPS_TRINITY_DN22622_c0_g1	1071	1.15712	Autophagy	1.59557e-11	42.86	XP_028137562.1	guanine nucleotide-binding protein subunit beta-2	0	94.52
JPS_TRINITY_DN2460_c0_g1	1437	-0.659342	Autophagy	1.38079e-14	50	XP_018579569.1	serine/threonine-protein kinase Warts	0	97.49
JPS_TRINITY_DN1169_c0_g1	3645	-1.18907	Autophagy	1.15117e-13	49.76	XP_023313205.1	homeodomain-interacting protein kinase 2 isoform X11	0	98.28
JPS_TRINITY_DN1920_c0_g1	402	1.73185	Autophagy	4.41509e-51	83.19	XP_018570387.1	autophagy protein 12-like	2.61764e-77	95.49
JPS_TRINITY_DN143_c0_g1	9630	0.304356	Autophagy	4.97532e-16	51.43	XP_018574731.1	vacuolar protein sorting-associated protein 13 isoform X2	0	89.32
JPS_TRINITY_DN92_c1_g1	2733	-0.702612	beta Glucan Binding Proteins	5.21158e-19	62	XP_018566681.1	xylosyltransferase oxt	0	96.38
JPS_TRINITY_DN17502_c0_g2	822	1.30348	beta Glucan Binding Proteins	2.20731e-33	65.29	XP_018575577.1	gram-negative bacteria-binding protein 3	1.46345e-147	84.62
JPS_TRINITY_DN5116_c0_g1	1920	0.503408	Caspase Activators	1.08563e-14	47.44	XP_018568223.1	WD repeat-containing protein 48 homolog	0	99.84
JPS_TRINITY_DN519_c2_g1	954	-0.029514	Caspase Activators	6.93124e-14	37.33	XP_018575655.1	guanine nucleotide-binding protein subunit beta-like protein	0	100
JPS_TRINITY_DN8625_c1_g1	1059	-0.236883	Caspase Activators	6.48859e-13	38.87	XP_018578548.1	guanine nucleotide-binding protein subunit beta-5	0	100
JPS_TRINITY_DN9576_c0_g1	1959	0.539933	Caspase Activators	2.04091e-10	51.52	XP_023011595.1	transcription initiation factor TFIID subunit 5	0	91.99
JPS_TRINITY_DN2718_c0_g1	2667	1.26952	Caspase Activators	3.72072e-09	41.51	XP_018570993.1	protein FAN-like	0	98.42
JPS_TRINITY_DN1613_c0_g1	945	1.84155	Caspase Activators	1.41885e-08	36.45	XP_018579104.1	target of rapamycin complex subunit lst8	0	99.04
JPS_TRINITY_DN10033_c0_g1	6075	-0.0484066	Caspase Activators	3.94173e-07	62.69	XP_018566394.1	WD repeat-containing protein 81 isoform X1	0	96.79
JPS_TRINITY_DN1700_c0_g1	1023	-0.655185	Caspase Activators	6.78021e-17	45.23	XP_018562751.1	guanine nucleotide-binding protein subunit beta-1	0	100
JPS_TRINITY_DN7990_c0_g1	1236	0.276023	Caspase Activators	4.22513e-14	42.08	XP_023018531.1	lissencephaly-1 homolog	0	99.03
JPS_TRINITY_DN131227_c0_g1	981	0.796115	Caspase Activators	4.73193e-06	42.02	XP_018567669.1	eukaryotic translation initiation factor 3 subunit I	0	99.08
JPS_TRINITY_DN1164_c1_g1	1002	0.752747	Caspases	1.01582e-34	51.21	XP_018567841.1	caspase-3	8.71062e-175	89.82
JPS_TRINITY_DN2726_c0_g2	789	0.890396	Caspases	2.82156e-79	67.47	XP_018577876.1	caspase-1 isoform X1	2.5482e-138	85.5
JPS_TRINITY_DN26812_c0_g1	780	-0.892129	Caspases	4.8314e-65	61.72	XP_018567637.1	caspase-1	1.36444e-143	72.5
JPS_TRINITY_DN8489_c0_g1	1116	0.00781421	Caspases	4.43695e-06	44.83	XP_018567642.1	uncharacterized protein LOC108908189	3.73999e-134	70.16
JPS_TRINITY_DN4709_c0_g1	894	0.810766	Caspases	4.13388e-44	61.19	XP_018571348.1	DCN1-like protein 2	0	99.66
JPS_TRINITY_DN3329_c2_g1	363	-3.03597	Caspases	2.08543e-07	44.05	ENN75864.1	hypothetical protein, partial	2.81149e-35	77.98
JPS_TRINITY_DN3544_c0_g1	2058	0.97019	Caspases	1.442e-62	75.58	XP_018567540.1	probable serine/threonine-protein kinase HSL1	0	87.61
JPS_TRINITY_DN20239_c0_g3	924	-1.2886	Caspases	1.33939e-33	57.69	XP_018566355.1	DCN1-like protein 3	0	97.72
JPS_TRINITY_DN27150_c2_g1	1239	0.892001	Caspases	3.04756e-68	54.59	XP_018577366.1	caspase-2-like isoform X1	0	88.11
JPS_TRINITY_DN18317_c0_g2	1308	1.68685	Caspases	1.10727e-74	55.93	JAB65110.1	Caspase-1	0	85.21
JPS_TRINITY_DN33108_c0_g1	324	-1.06188	Catalases	1.45681e-43	78	XP_018575508.1	catalase-like	1.79163e-56	92
JPS_TRINITY_DN3169_c0_g1	654	0.718864	Cecropins	9.69038e-12	51.46	XP_018579400.1	trafficking protein particle complex subunit 4	1.71952e-153	98.62
JPS_TRINITY_DN6861_c0_g1	438	0.149955	Cecropins	6.77467e-87	91.03	XP_018570769.1	trafficking protein particle complex subunit 1	1.92375e-99	97.93
JPS_TRINITY_DN6129_c0_g1	1161	1.46796	Clip-Domain Serine Proteases	2.53707e-91	57.99	XP_018579289.1	uncharacterized protein LOC108917267	0	93.01
JPS_TRINITY_DN4767_c0_g1	780	-0.321211	Clip-Domain Serine Proteases	1.41549e-51	57.83	JAB68214.1	Serine protease	1.24462e-126	82.38
JPS_TRINITY_DN5751_c0_g1	1167	0.763081	Clip-Domain Serine Proteases	8.55268e-46	55.08	XP_018566663.1	trypsin-1-like isoform X1	0	91.39
JPS_TRINITY_DN14746_c0_g1	993	-5.6075	Clip-Domain Serine Proteases	4.17066e-72	52.38	XP_018565258.1	tryptase alpha/beta-1-like isoform X1	0	84.94
JPS_TRINITY_DN2397_c0_g1	852	-1.0335	Clip-Domain Serine Proteases	6.43106e-31	47.39	XP_018570823.1	brachyurin-like	1.60651e-159	89.75
JPS_TRINITY_DN2397_c0_g2	852	-2.01834	Clip-Domain Serine Proteases	6.2372e-30	47.74	XP_023310799.1	brachyurin-like	5.11433e-165	90.81
JPS_TRINITY_DN4148_c0_g1	867	-1.50038	Clip-Domain Serine Proteases	2.75123e-21	47.53	JAB66463.1	Chymotrypsin, partial	1.81927e-151	88.07
JPS_TRINITY_DN15807_c0_g2	852	-1.6928	Clip-Domain Serine Proteases	3.25133e-19	42.06	XP_018570821.1	brachyurin	1.91094e-122	82.5
JPS_TRINITY_DN12726_c0_g1	2124	2.05654	Clip-Domain Serine Proteases	2.59766e-57	50.67	XP_018568841.1	serine protease easter-like	0	78.77
JPS_TRINITY_DN131303_c0_g1	840	-1.59616	Clip-Domain Serine Proteases	6.31723e-31	47.62	XP_018563533.1	brachyurin	2.0744e-174	91.76
JPS_TRINITY_DN7139_c0_g1	951	1.83652	Clip-Domain Serine Proteases	1.6377e-59	58.8	XP_023310512.1	transmembrane protease serine 9-like	4.73869e-153	81.39
JPS_TRINITY_DN108339_c0_g1	843	-1.34793	Clip-Domain Serine Proteases	1.24171e-29	49.62	XP_018563532.1	brachyurin	1.90828e-163	91.43
JPS_TRINITY_DN805_c0_g1	1227	0.337076	Clip-Domain Serine Proteases	7.89528e-91	58.31	XP_018562087.1	serine protease persephone	0	92.67
JPS_TRINITY_DN30811_c0_g3	1239	0.962275	Clip-Domain Serine Proteases	2.9528e-85	56.15	XP_018562095.1	serine protease persephone	0	84.47
JPS_TRINITY_DN805_c1_g1	1158	1.5457	Clip-Domain Serine Proteases	3.18245e-78	57.14	XP_018562093.2	uncharacterized protein LOC108904148	3.06847e-173	75.57
JPS_TRINITY_DN1187_c0_g2	1200	1.39182	Clip-Domain Serine Proteases	2.16245e-72	55.81	XP_018562111.1	serine protease snake-like	0	82.41
JPS_TRINITY_DN805_c1_g3	1173	2.5867	Clip-Domain Serine Proteases	1.22268e-69	53.03	XP_018562073.1	uncharacterized protein LOC108904130	0	83.16
JPS_TRINITY_DN1187_c0_g3	1173	2.29347	Clip-Domain Serine Proteases	6.70906e-76	53.39	XP_018562093.2	uncharacterized protein LOC108904148	0	82.01
JPS_TRINITY_DN4921_c0_g1	1356	1.72456	Clip-Domain Serine Proteases	8.91548e-71	55.68	XP_018573798.2	uncharacterized protein LOC108912870	0	78.04
JPS_TRINITY_DN871_c0_g3	789	0.508484	Clip-Domain Serine Proteases	1.89259e-29	50.89	XP_018573793.1	trypsin 3A1	2.39532e-128	79.23
JPS_TRINITY_DN110277_c0_g1	759	-1.94753	Clip-Domain Serine Proteases	1.80998e-44	55.26	XP_018570644.1	proclotting enzyme-like isoform X2	3.13827e-171	98.81
JPS_TRINITY_DN5178_c0_g2	1185	2.38819	Clip-Domain Serine Proteases	4.47213e-70	52.39	XP_018562111.1	serine protease snake-like	6.67581e-177	77.49
JPS_TRINITY_DN10403_c0_g2	1143	2.47482	Clip-Domain Serine Proteases	2.97005e-68	53.71	XP_018563885.1	serine protease 7-like isoform X2	1.22775e-172	77.6
JPS_TRINITY_DN3109_c0_g1	1101	-0.371966	Clip-Domain Serine Proteases	7.85972e-63	57.35	XP_023309940.1	serine protease 7-like	0	90.72
JPS_TRINITY_DN7469_c0_g1	1275	0.789202	Clip-Domain Serine Proteases	2.37059e-62	50.55	XP_018563878.1	serine protease 7-like	0	79.8
JPS_TRINITY_DN6235_c0_g1	1110	-0.0042578	Clip-Domain Serine Proteases	5.41148e-56	50.92	XP_018575081.1	venom protease-like	0	97.3
JPS_TRINITY_DN16350_c0_g1	993	0.122587	Clip-Domain Serine Proteases	1.03886e-37	50.59	XP_018565684.1	brachyurin	6.09789e-76	64.39
JPS_TRINITY_DN8209_c0_g1	324	0.204946	Clip-Domain Serine Proteases	4.23277e-22	56.6	XP_018562110.1	serine protease persephone-like isoform X2	1.16722e-43	76.79
JPS_TRINITY_DN141834_c0_g1	999	0.907952	Clip-Domain Serine Proteases	2.79473e-31	47.55	XP_018573675.1	proclotting enzyme-like	0	96.53
JPS_TRINITY_DN109985_c0_g1	783	1.66651	Clip-Domain Serine Proteases	3.84776e-16	42.52	XP_018577067.1	venom peptide isomerase heavy chain-like	2.66152e-139	86.69
JPS_TRINITY_DN4125_c0_g1	1308	1.89802	Clip-Domain Serine Proteases	3.7085e-87	62.72	XP_023310439.1	serine protease 27	0	79.73
JPS_TRINITY_DN11454_c0_g1	1185	1.60673	Clip-Domain Serine Proteases	4.27537e-73	54.81	XP_018562093.2	uncharacterized protein LOC108904148	5.48055e-170	77.25
JPS_TRINITY_DN7659_c0_g1	1227	-1.2188	Clip-Domain Serine Proteases	2.44227e-40	52.87	XP_018566053.1	venom serine protease-like	0	91.67
JPS_TRINITY_DN23321_c0_g1	951	0.400789	Clip-Domain Serine Proteases	1.34298e-28	46.82	XP_018579282.1	serine protease 7-like	1.47961e-148	82.14
JPS_TRINITY_DN19208_c0_g1	1983	1.47241	Clip-Domain Serine Proteases	5.27538e-67	55.07	XP_023309938.1	uncharacterized protein LOC108905492	3.7423e-168	65.33
JPS_TRINITY_DN10276_c0_g2	885	-1.62065	Clip-Domain Serine Proteases	1.03609e-22	50.43	XP_018565684.1	brachyurin	4.92218e-108	76.77
JPS_TRINITY_DN4457_c0_g1	831	-2.59439	Clip-Domain Serine Proteases	2.34198e-31	48.68	JAB62958.1	Chymotrypsin BI	1.03623e-163	88.69
JPS_TRINITY_DN7_c0_g1	876	-2.14563	Clip-Domain Serine Proteases	1.723e-20	52.05	XP_023312141.1	chymotrypsin-like	2.59875e-142	89.53
JPS_TRINITY_DN149_c1_g1	1329	1.48504	Clip-Domain Serine Proteases	1.2782e-91	60.8	JAB66312.1	Serine protease	0	83.1
JPS_TRINITY_DN9175_c0_g1	1134	1.93021	Clip-Domain Serine Proteases	2.09527e-85	57.6	XP_018568842.1	serine protease 7-like	0	92.04
JPS_TRINITY_DN15006_c0_g1	1056	-0.0518878	Clip-Domain Serine Proteases	4.30514e-79	56.55	XP_018568826.1	serine protease 7-like	0	84.57
JPS_TRINITY_DN3964_c0_g1	1161	1.87583	Clip-Domain Serine Proteases	4.51976e-61	50.29	XP_018563886.1	serine protease 7-like	4.4666e-178	76.68
JPS_TRINITY_DN680_c0_g1	1263	3.61191	Clip-Domain Serine Proteases	1.79637e-57	52.45	XP_018563883.1	serine protease 7	8.82445e-178	71.98
JPS_TRINITY_DN97009_c0_g1	852	-1.86631	Clip-Domain Serine Proteases	1.58316e-32	49.81	XP_018572237.1	chymotrypsin-like	2.32423e-163	88.81
JPS_TRINITY_DN7045_c0_g1	1092	1.0408	Clip-Domain Serine Proteases	1.18482e-71	53.62	XP_023310955.1	uncharacterized protein LOC108912856	1.80312e-175	81.03
JPS_TRINITY_DN142618_c0_g1	1245	1.4352	Clip-Domain Serine Proteases	4.21445e-67	57.58	XP_018573798.2	uncharacterized protein LOC108912870	1.47907e-168	75.06
JPS_TRINITY_DN130840_c0_g1	831	-1.41651	Clip-Domain Serine Proteases	6.27036e-31	50.23	JAB65664.1	Chymotrypsin, partial	1.8664e-135	85.49
JPS_TRINITY_DN2519_c0_g1	1212	3.07949	Clip-Domain Serine Proteases	6.40041e-64	52.62	XP_023309939.1	serine protease 7-like	0	75.93
JPS_TRINITY_DN1358_c0_g1	459	2.68394	Clip-Domain Serine Proteases	1.95152e-62	77.03	JAB63779.1	Xanthine dehydrogenase	8.70133e-93	97.32
JPS_TRINITY_DN4066_c0_g1	3786	0.439183	Clip-Domain Serine Proteases	2.17929e-24	53.69	XP_018569701.1	xanthine dehydrogenase/oxidase-like	0	91.75
JPS_TRINITY_DN38_c0_g2	1170	1.10804	Clip-Domain Serine Proteases	7.17268e-42	53.73	XP_018561219.1	glycoprotein-N-acetylgalactosamine 3-beta-galactosyltransferase 1	0	94.09
JPS_TRINITY_DN4481_c0_g1	1071	-0.186201	Clip-Domain Serine Proteases	8.14741e-41	54.23	XP_018561221.1	glycoprotein-N-acetylgalactosamine 3-beta-galactosyltransferase 1-like	0	98.6
JPS_TRINITY_DN10358_c1_g3	768	0.951742	Clip-Domain Serine Proteases	2.6029e-34	49.39	XP_018573075.1	trypsin-3-like	3.55758e-150	93.31
JPS_TRINITY_DN7_c0_g2	876	-0.857375	Clip-Domain Serine Proteases	1.12778e-33	48.4	JAB64057.1	Chymotrypsin, partial	4.71695e-172	92.1
JPS_TRINITY_DN3250_c0_g1	921	-0.485783	Clip-Domain Serine Proteases	4.70486e-14	42.92	XP_018569642.1	cationic trypsin-like	5.66288e-153	87.91
JPS_TRINITY_DN5089_c0_g1	825	-2.03617	Clip-Domain Serine Proteases	2.43537e-32	48.68	XP_018566991.1	serine protease persephone	3.92232e-115	80.78
JPS_TRINITY_DN3750_c2_g1	1974	-0.746029	Clip-Domain Serine Proteases	2.79252e-20	64.71	XP_018570496.1	NADP-dependent malic enzyme	0	98.05
JPS_TRINITY_DN4063_c0_g1	1923	-0.214206	Clip-Domain Serine Proteases	1.05586e-15	66.25	XP_018570419.1	NADP-dependent malic enzyme isoform X2	0	95.42
JPS_TRINITY_DN96443_c0_g1	762	-0.899962	Clip-Domain Serine Proteases	1.00481e-19	45.69	XP_018566647.2	transmembrane protease serine 9	5.33073e-137	90.51
JPS_TRINITY_DN81894_c1_g1	1179	1.03935	Clip-Domain Serine Proteases	2.08542e-09	49.61	XP_018571523.1	prolactin-releasing peptide receptor-like	0	99.21
JPS_TRINITY_DN119171_c0_g1	1455	1.68806	Clip-Domain Serine Proteases	4.91943e-49	55.89	XP_018571288.1	serine proteinase stubble isoform X3	0	95.29
JPS_TRINITY_DN2093_c0_g1	1917	0.276196	Clip-Domain Serine Proteases	2.09331e-59	46.86	XP_023310931.1	angiotensin-converting enzyme-like	0	93.72
JPS_TRINITY_DN180_c0_g1	1866	0.587764	Clip-Domain Serine Proteases	1.91139e-58	48.95	XP_018577093.1	angiotensin-converting enzyme-like isoform X2	0	96.18
JPS_TRINITY_DN7540_c0_g1	2169	-0.352989	Clip-Domain Serine Proteases	4.62478e-57	46.77	XP_019764853.1	angiotensin-converting enzyme-like	0	85.28
JPS_TRINITY_DN5104_c0_g1	1962	-3.81138	Clip-Domain Serine Proteases	1.37798e-38	45.87	XP_018577093.1	angiotensin-converting enzyme-like isoform X2	6.21296e-168	63.67
JPS_TRINITY_DN4324_c0_g2	2007	0.0835879	Clip-Domain Serine Proteases	1.87647e-10	38.77	XP_023311251.1	angiotensin-converting enzyme	0	91.47
JPS_TRINITY_DN5130_c0_g1	762	-1.42364	Clip-Domain Serine Proteases	5.46591e-26	47.57	KAF7266472.1	hypothetical protein	9.11986e-74	61.73
JPS_TRINITY_DN11152_c0_g1	1050	0.230922	Clip-Domain Serine Proteases	2.22436e-56	53.82	XP_023310955.1	uncharacterized protein LOC108912856	1.20274e-118	70.45
JPS_TRINITY_DN74003_c0_g1	768	-0.706602	Clip-Domain Serine Proteases	9.46961e-31	51.37	XP_023015289.1	trypsin-7-like isoform X1	1.64174e-68	64.17
JPS_TRINITY_DN1187_c0_g4	1170	2.18303	Clip-Domain Serine Proteases	3.97049e-75	54.62	XP_018562093.2	uncharacterized protein LOC108904148	1.19709e-177	79.95
JPS_TRINITY_DN108941_c0_g1	843	-2.02219	Clip-Domain Serine Proteases	1.23475e-27	50.85	XP_018565725.1	brachyurin-like	6.44406e-155	88.57
JPS_TRINITY_DN49962_c0_g1	369	0.0756247	Clip-Domain Serine Proteases	7.00677e-06	48.28	XP_018570674.1	uncharacterized protein LOC108910537	1.73099e-75	90.83
JPS_TRINITY_DN141766_c0_g1	858	1.56268	Clip-Domain Serine Proteases	3.51736e-22	43.95	XP_023311581.1	transmembrane protease serine 9	6.89391e-144	82.81
JPS_TRINITY_DN3651_c0_g1	834	-2.34706	Clip-Domain Serine Proteases	3.35532e-30	52.67	XP_018561255.1	brachyurin-like	3.21696e-145	86.64
JPS_TRINITY_DN1327_c0_g1	843	-2.01729	Clip-Domain Serine Proteases	3.28826e-27	46.77	JAB64809.1	Chymotrypsin, partial	7.12213e-151	89.49
JPS_TRINITY_DN4567_c0_g1	897	-1.56693	Clip-Domain Serine Proteases	2.26041e-26	50.96	JAB65142.1	Chymotrypsin, partial	1.36846e-169	93.5
JPS_TRINITY_DN1327_c0_g2	828	-2.26795	Clip-Domain Serine Proteases	3.22715e-25	46.88	JAB64809.1	Chymotrypsin, partial	1.86407e-155	91.91
JPS_TRINITY_DN16763_c0_g1	855	0.509753	Clip-Domain Serine Proteases	1.223e-57	58.98	XP_023310385.1	serine proteinase stubble	0	100
JPS_TRINITY_DN805_c1_g2	1224	3.52863	Clip-Domain Serine Proteases	1.72624e-88	53.9	XP_018562074.1	uncharacterized protein LOC108904131	0	84.58
JPS_TRINITY_DN1187_c0_g1	1170	1.33032	Clip-Domain Serine Proteases	1.18863e-72	49.25	XP_018562093.2	uncharacterized protein LOC108904148	0	78.45
JPS_TRINITY_DN9441_c0_g1	1161	1.30036	Clip-Domain Serine Proteases	1.89743e-81	60.96	XP_018565645.1	venom protease	0	93.66
JPS_TRINITY_DN5659_c0_g1	759	-0.980982	Clip-Domain Serine Proteases	4.56561e-39	55.14	XP_018563115.1	trypsin-4-like isoform X1	9.55488e-155	90.27
JPS_TRINITY_DN56913_c0_g1	1653	2.15512	Clip-Domain Serine Proteases	7.89735e-35	54.44	XP_018570111.1	proclotting enzyme-like	0	92.62
JPS_TRINITY_DN33660_c0_g1	1041	0.676008	Clip-Domain Serine Proteases	3.19223e-51	53.07	XP_018564341.1	tryptase-like	0	98.55
JPS_TRINITY_DN954_c0_g1	828	-1.92031	Clip-Domain Serine Proteases	9.80885e-33	54.47	JAB65007.1	Chymotrypsin BI	3.57597e-152	85.82
JPS_TRINITY_DN30811_c0_g2	783	0.523222	Clip-Domain Serine Proteases	4.03565e-65	59.67	XP_018562095.1	serine protease persephone	1.51448e-123	86.42
JPS_TRINITY_DN1098_c0_g1	846	-2.58973	Clip-Domain Serine Proteases	2.78355e-29	46.99	JAB64415.1	Chymotrypsin BI	1.24538e-143	89.25
JPS_TRINITY_DN1314_c0_g1	846	-1.95856	Clip-Domain Serine Proteases	2.86347e-26	46.34	XP_018580029.1	uncharacterized protein LOC108917765	3.46358e-159	95.36
JPS_TRINITY_DN1314_c0_g2	846	-2.19141	Clip-Domain Serine Proteases	1.27395e-20	47.08	XP_018580082.1	brachyurin	1.24758e-139	88.97
JPS_TRINITY_DN3894_c0_g1	1062	1.20293	Clip-Domain Serine Proteases	7.01721e-59	58.24	XP_023024181.1	melanization protease 1-like	2.52334e-173	81.3
JPS_TRINITY_DN3691_c0_g1	927	1.96892	Clip-Domain Serine Proteases	1.0359e-44	53.76	XP_018579323.1	venom protease-like	7.86581e-135	77.55
JPS_TRINITY_DN28769_c0_g1	768	-2.42354	Clip-Domain Serine Proteases	5.87806e-37	55.47	XP_018563287.1	chymotrypsin-1	5.30385e-162	94.49
JPS_TRINITY_DN76029_c0_g1	792	-0.0152257	Clip-Domain Serine Proteases	1.61187e-16	44.64	XP_018570818.1	chymotrypsin BII	5.67557e-105	75.77
JPS_TRINITY_DN3499_c0_g1	942	1.8541	Clip-Domain Serine Proteases	1.55311e-66	59.85	JAB68232.1	Serine protease	1.0938e-175	85.53
JPS_TRINITY_DN7022_c0_g1	912	0.457153	Clip-Domain Serine Proteases	2.27134e-51	57.04	JAB68232.1	Serine protease	7.42809e-82	63.64
JPS_TRINITY_DN991_c0_g1	945	0.924389	Clip-Domain Serine Proteases	5.7317e-86	64.23	XP_018562097.1	serine protease snake-like isoform X1	0	87.74
JPS_TRINITY_DN34001_c0_g1	1044	0.675385	Clip-Domain Serine Proteases	1.83682e-69	59.71	XP_023310071.1	serine protease snake-like	1.03528e-119	69.91
JPS_TRINITY_DN30866_c0_g1	1176	0.864549	Clip-Domain Serine Proteases	3.36706e-95	57.55	XP_018562088.1	venom protease-like	0	84.26
JPS_TRINITY_DN17313_c0_g1	474	2.05511	Clip-Domain Serine Proteases	5.57764e-28	60.87	XP_023310071.1	serine protease snake-like	4.01832e-58	75
JPS_TRINITY_DN19270_c0_g1	1116	2.32713	Clip-Domain Serine Proteases	4.19232e-93	61.93	XP_018562474.1	serine protease persephone-like	0	90.88
JPS_TRINITY_DN6575_c0_g1	1038	-0.094045	Clip-Domain Serine Proteases	3.48137e-77	54.08	XP_018562471.1	venom protease-like	6.68667e-122	69.16
JPS_TRINITY_DN1128_c0_g1	1068	0.632468	Clip-Domain Serine Proteases	5.90662e-70	55.33	XP_018575509.1	trypsin-1	2.17884e-155	76.86
JPS_TRINITY_DN1128_c0_g2	1092	1.05758	Clip-Domain Serine Proteases	1.71739e-63	53.58	XP_018576466.1	venom protease	3.1055e-113	66.04
JPS_TRINITY_DN26024_c0_g1	429	0.60865	Clip-Domain Serine Proteases	1.76601e-28	61.86	XP_018579076.1	trypsin-1	6.27404e-87	99.22
JPS_TRINITY_DN277_c0_g1	1140	2.54024	Clip-Domain Serine Proteases	4.883e-99	57.36	XP_018569538.1	serine protease easter	0	88.39
JPS_TRINITY_DN130384_c0_g1	1218	-0.721928	Clip-Domain Serine Proteases	2.90515e-88	63.5	XP_018568725.1	melanization protease 1-like	0	86.87
JPS_TRINITY_DN10489_c0_g1	813	0.678315	Clip-Domain Serine Proteases	2.06756e-49	54.28	XP_018569538.1	serine protease easter	2.55467e-59	56.34
JPS_TRINITY_DN31133_c0_g1	4173	-0.312813	C-Type Lectins	3.41625e-06	45.45	XP_018575830.1	extracellular matrix protein A-like	0	82.37
JPS_TRINITY_DN3162_c0_g1	1710	2.93733	C-Type Lectins	1.97455e-28	64	XP_018573830.1	macrophage mannose receptor 1	0	78.15
JPS_TRINITY_DN9649_c0_g1	720	-1.30939	C-Type Lectins	2.89278e-17	48.59	XP_018573083.1	macrophage mannose receptor 1-like	2.04072e-61	65.71
JPS_TRINITY_DN3632_c0_g2	2766	1.12283	C-Type Lectins	7.84893e-34	48.48	XP_018569610.1	uncharacterized protein LOC108909691	0	90.42
JPS_TRINITY_DN2050_c0_g1	2916	1.97249	C-Type Lectins	3.22651e-31	51.06	XP_018574095.1	uncharacterized protein LOC108913103	0	90.1
JPS_TRINITY_DN185_c0_g1	2529	0.837556	C-Type Lectins	3.64689e-30	52.24	XP_018579950.1	uncharacterized protein LOC108917697 isoform X1	0	85.71
JPS_TRINITY_DN4982_c0_g1	2493	2.0896	C-Type Lectins	1.81328e-30	53.06	XP_018569606.1	uncharacterized protein LOC108909686	0	82.12
JPS_TRINITY_DN141634_c0_g1	744	-1.86621	C-Type Lectins	4.5278e-20	49.52	XP_023310619.1	transmembrane protease serine 9-like isoform X2	1.30926e-145	92.24
JPS_TRINITY_DN6458_c0_g1	1926	1.42429	C-Type Lectins	1.45339e-31	52.47	XP_018580229.1	modular serine protease	0	91.9
JPS_TRINITY_DN2469_c0_g1	462	3.01952	C-Type Lectins	9.97885e-13	46.62	XP_018574094.1	uncharacterized protein LOC108913102	3.1227e-59	78.29
JPS_TRINITY_DN313_c0_g1	2778	2.47022	C-Type Lectins	3.8152e-33	50.93	XP_018574094.1	uncharacterized protein LOC108913102	0	84.57
JPS_TRINITY_DN86750_c0_g1	804	-1.39232	C-Type Lectins	4.02935e-09	43.84	AAS05317.1	16.3 kDa salivary protein	5.17242e-08	44.53
JPS_TRINITY_DN2738_c0_g3	462	3.03799	C-Type Lectins	6.18861e-07	53.33	XP_018578512.1	macrophage mannose receptor 1-like	9.43405e-52	76
JPS_TRINITY_DN15154_c1_g3	735	-1.31893	C-Type Lectins	3.71061e-30	53.67	XP_018574681.1	apyrase-like	1.41869e-130	92.06
JPS_TRINITY_DN35977_c0_g1	1761	0.066437	C-Type Lectins	9.13026e-30	55.49	XP_018564167.1	protein 5NUC	0	93.03
JPS_TRINITY_DN15154_c1_g1	1683	-1.03324	C-Type Lectins	1.03081e-27	54.6	XP_018574681.1	apyrase-like	0	94.93
JPS_TRINITY_DN8712_c0_g1	1680	0.25744	C-Type Lectins	7.25073e-22	55.24	XP_018574672.1	apyrase	0	95.71
JPS_TRINITY_DN29729_c0_g1	324	-1.72368	C-Type Lectins	2.6625e-19	57.94	XP_018561630.1	perlucin-like	2.82991e-68	94.34
JPS_TRINITY_DN2465_c0_g1	1653	0.996954	C-Type Lectins	7.48312e-31	60.9	XP_018573083.1	macrophage mannose receptor 1-like	0	83.42
JPS_TRINITY_DN10004_c0_g1	423	2.33815	C-Type Lectins	3.16074e-27	62.6	XP_018561629.1	perlucin-like	3.35094e-68	83.33
JPS_TRINITY_DN679_c0_g1	2943	1.13023	C-Type Lectins	1.23916e-23	60.14	XP_018573088.1	uncharacterized protein LOC108912373 isoform X2	0	72.41
JPS_TRINITY_DN8978_c1_g1	4506	-0.858349	C-Type Lectins	3.67329e-52	45.24	XP_023309744.1	uncharacterized protein LOC108917252	0	98.26
JPS_TRINITY_DN2550_c0_g1	1893	-0.258646	C-Type Lectins	1.98897e-20	42.52	XP_018570408.1	sushi, von Willebrand factor type A, EGF and pentraxin domain-containing protein 1	0	96.21
JPS_TRINITY_DN23885_c1_g2	828	-3.71699	C-Type Lectins	4.64685e-37	53.22	XP_018565430.1	myrosinase 1	4.66138e-119	78.62
JPS_TRINITY_DN23885_c2_g1	714	-0.388607	C-Type Lectins	2.61248e-35	56.65	XP_018565433.1	myrosinase 1	4.15927e-111	89.11
JPS_TRINITY_DN5439_c0_g1	513	-0.847618	C-Type Lectins	7.56281e-63	70.18	XP_023311341.1	myrosinase 1	1.32199e-112	95.91
JPS_TRINITY_DN23885_c1_g1	789	-4.48003	C-Type Lectins	1.45056e-61	58.3	JAB65262.1	Lactase-like protein	1.00504e-146	85.71
JPS_TRINITY_DN4581_c0_g1	642	-1.19813	C-Type Lectins	5.90376e-60	64.65	XP_018568746.1	myrosinase 1-like	5.41293e-132	94.39
JPS_TRINITY_DN25412_c0_g1	633	-0.558909	C-Type Lectins	2.12438e-17	59.78	JAV97782.1	hypothetical protein, partial	3.86082e-65	73.21
JPS_TRINITY_DN25347_c0_g2	3978	-2.08738	C-Type Lectins	1.11653e-15	53.85	XP_031336688.1	uncharacterized protein K02A2.6-like	0	65.62
JPS_TRINITY_DN11884_c0_g1	969	-1.43165	C-Type Lectins	2.27988e-11	53.54	JAG83687.1	Retrotransposable element Tf2 protein type 1	1.01423e-95	66.67
JPS_TRINITY_DN23283_c0_g3	426	-3.22905	C-Type Lectins	1.71493e-10	56.94	JAV97782.1	hypothetical protein, partial	1.77794e-50	75
JPS_TRINITY_DN10701_c0_g1	600	-2.24807	C-Type Lectins	2.12852e-10	55.56	XP_019772768.1	uncharacterized protein K02A2.6-like	8.10273e-76	78.45
JPS_TRINITY_DN11218_c0_g1	1398	-1.96112	C-Type Lectins	2.2517e-10	50	VEN45577.1	unnamed protein product, partial	1.04511e-145	64.89
JPS_TRINITY_DN35134_c0_g1	567	-1.73552	C-Type Lectins	1.30908e-09	52.63	XP_030751492.1	uncharacterized protein K02A2.6-like	5.04221e-73	75.14
JPS_TRINITY_DN18719_c0_g1	2175	-3.80273	C-Type Lectins	1.31775e-09	48.8	CAD7099714.1	unnamed protein product	0	63.69
JPS_TRINITY_DN11021_c0_g1	1017	-1.4553	C-Type Lectins	2.76496e-09	48.36	CAD7100887.1	unnamed protein product	5.82907e-91	64.46
JPS_TRINITY_DN78115_c0_g2	387	-0.27491	C-Type Lectins	2.17564e-07	49.04	JAB64129.1	Retrotransposable element	2.18745e-66	89.06
JPS_TRINITY_DN21772_c0_g3	309	-2.96287	C-Type Lectins	2.32573e-07	55.95	KXJ62352.1	hypothetical protein	1.16836e-25	72.83
JPS_TRINITY_DN75678_c0_g2	1551	-1.45943	C-Type Lectins	3.86287e-07	54.95	JAV83378.1	hypothetical protein, partial	0	73.65
JPS_TRINITY_DN27015_c0_g1	696	-1.62255	C-Type Lectins	8.23951e-07	61.9	JAB64761.1	hypothetical protein, partial	8.48771e-120	86.02
JPS_TRINITY_DN3608_c0_g2	417	-1.26167	C-Type Lectins	4.14688e-06	44.66	KMQ83185.1	gag pol polyprotein	1.90782e-62	79.71
JPS_TRINITY_DN4131_c1_g1	4242	-1.31683	C-Type Lectins	7.74488e-06	47.47	KAF0712950.1	Uncharacterized protein, partial	0	67.22
JPS_TRINITY_DN1185_c0_g1	783	-1.26393	C-Type Lectins	2.23537e-07	60.78	XP_018564703.1	uncharacterized protein LOC108906047, partial	2.36075e-150	99.21
JPS_TRINITY_DN521_c0_g1	1035	1.8077	C-Type Lectins	5.12763e-29	58.65	XP_018573082.1	macrophage mannose receptor 1	0	93.87
JPS_TRINITY_DN82417_c0_g1	594	1.3182	C-Type Lectins	3.32021e-26	60.61	XP_018570485.1	perlucin-like	8.65129e-108	84.5
JPS_TRINITY_DN2648_c0_g1	1221	1.26975	C-Type Lectins	2.47496e-67	52.47	XP_018564126.1	trypsin beta-like	0	84.52
JPS_TRINITY_DN96955_c0_g1	618	-1.63473	C-Type Lectins	1.60352e-36	62.5	AIY53682.1	myosin regulatory light chain 2	5.15408e-106	100
JPS_TRINITY_DN958_c1_g1	450	0.0453457	C-Type Lectins	1.89025e-32	65	MBW64705.1	putative calmodulin isoform x3	5.69213e-105	100
JPS_TRINITY_DN2611_c0_g4	534	0.567334	C-Type Lectins	2.23072e-28	58.33	XP_023312078.1	neo-calmodulin-like isoform X2	3.01833e-125	100
JPS_TRINITY_DN652_c1_g1	10734	-1.74346	C-Type Lectins	4.70953e-20	42.68	XP_019871481.1	sushi, von Willebrand factor type A, EGF and pentraxin domain-containing protein 1	0	93.4
JPS_TRINITY_DN27002_c0_g1	444	0.492306	C-Type Lectins	2.16097e-19	53.42	XP_018573993.1	myosin-2 essential light chain isoform X2	1.71394e-105	100
JPS_TRINITY_DN10598_c0_g3	567	-1.09243	C-Type Lectins	3.13349e-08	55.56	JAB65616.1	Troponin C	1.51269e-103	99.33
JPS_TRINITY_DN77470_c0_g1	339	-2.14918	C-Type Lectins	3.77186e-16	61.29	KAF5304445.1	hypothetical protein	2.69553e-17	66.67
JPS_TRINITY_DN2851_c0_g2	1395	1.03976	C-Type Lectins	2.80757e-96	50.91	XP_018571207.1	chymotrypsin-C-like	0	81.6
JPS_TRINITY_DN4971_c0_g1	306	-0.855166	C-Type Lectins	6.24312e-58	90.91	XP_018571205.1	limulus clotting factor C-like	1.64558e-64	99.01
JPS_TRINITY_DN3179_c0_g1	615	0.284989	C-Type Lectins	1.45402e-40	63.43	XP_018569917.1	perlucin-like isoform X2	1.1173e-101	77.4
JPS_TRINITY_DN1304_c0_g1	567	1.48445	C-Type Lectins	4.3269e-31	61.38	XP_018561629.1	perlucin-like	2.56907e-104	85.64
JPS_TRINITY_DN3179_c0_g2	531	0.573367	C-Type Lectins	9.1554e-26	51.14	XP_018569919.1	perlucin-like	1.97999e-77	81.71
JPS_TRINITY_DN56602_c0_g1	2094	2.7206	C-Type Lectins	1.075e-23	56.64	XP_018577179.1	macrophage mannose receptor 1-like	0	78.37
JPS_TRINITY_DN2042_c0_g1	504	1.42156	C-Type Lectins	1.67522e-22	45.74	XP_018561631.1	E-selectin-like	5.22557e-104	90.96
JPS_TRINITY_DN2738_c0_g2	1149	3.3272	C-Type Lectins	1.93859e-19	51.11	XP_018578512.1	macrophage mannose receptor 1-like	2.678e-173	78.48
JPS_TRINITY_DN2456_c0_g2	471	1.78967	C-Type Lectins	3.84341e-17	50	XP_018573084.1	mannose-binding protein C-like	2.3574e-81	86.62
JPS_TRINITY_DN7379_c0_g1	1155	0.91272	C-Type Lectins	1.32895e-87	60.98	XP_018567376.1	uncharacterized protein LOC108907975	0	94.12
JPS_TRINITY_DN85612_c0_g1	1509	-0.856143	C-Type Lectins	7.07249e-77	58.45	XP_023312991.1	cytochrome P450 4C1-like	0	90.64
JPS_TRINITY_DN1976_c0_g4	1476	0.407246	C-Type Lectins	1.09428e-74	57.77	XP_023309989.1	cytochrome P450 4C1-like	0	95.93
JPS_TRINITY_DN5487_c0_g2	1296	-2.08982	C-Type Lectins	2.0961e-74	57.88	XP_018563755.1	cytochrome P450 4C1-like	0	86.95
JPS_TRINITY_DN1929_c0_g1	1689	-0.0347721	C-Type Lectins	3.16341e-64	52.73	NP_001352320.1	cytochrome P450 4g15-like	0	97.33
JPS_TRINITY_DN4799_c2_g2	1485	0.266677	C-Type Lectins	1.11744e-63	54.01	XP_018572346.2	unnamed protein product	0	89.84
JPS_TRINITY_DN415_c0_g2	1497	-0.278138	C-Type Lectins	2.26075e-62	52.32	XP_023309751.1	cytochrome P450 4d2	0	89.82
JPS_TRINITY_DN415_c0_g1	1512	0.385572	C-Type Lectins	1.77057e-60	52.98	XP_023309756.1	probable cytochrome P450 4d14	0	85.69
JPS_TRINITY_DN6799_c0_g1	1479	-0.677253	C-Type Lectins	3.90534e-60	54.88	NP_001352375.1	cytochrome P450 4c3-like	0	94.51
JPS_TRINITY_DN1853_c0_g2	1479	1.81418	C-Type Lectins	4.96411e-60	55.96	XP_023309982.1	uncharacterized protein LOC108904025	0	89.23
JPS_TRINITY_DN6322_c0_g1	1677	0.484116	C-Type Lectins	8.90744e-58	54.7	XP_018572314.1	cytochrome P450 4g15-like	0	93.35
JPS_TRINITY_DN7703_c0_g2	1542	-0.0354506	C-Type Lectins	1.09066e-53	52.43	XP_018564638.1	cytochrome P450 4c3-like	0	91.02
JPS_TRINITY_DN1976_c0_g1	792	-3.33357	C-Type Lectins	1.39228e-50	65.35	XP_023309989.1	cytochrome P450 4C1-like	1.73814e-134	86.26
JPS_TRINITY_DN5487_c0_g3	1314	-0.331966	C-Type Lectins	1.76973e-49	55.32	XP_018563755.1	cytochrome P450 4C1-like	0	87.82
JPS_TRINITY_DN4422_c0_g1	1416	0.663426	C-Type Lectins	7.66424e-49	51.17	XP_018572296.1	probable cytochrome P450 4aa1	0	91.51
JPS_TRINITY_DN17091_c0_g1	909	-0.379644	C-Type Lectins	2.69867e-47	53.11	XP_018569427.1	unnamed protein product	0	93.73
JPS_TRINITY_DN5487_c0_g1	1092	-0.705354	C-Type Lectins	4.7819e-47	66.67	XP_018563755.1	cytochrome P450 4C1-like	0	84.62
JPS_TRINITY_DN1354_c0_g1	570	2.38358	C-Type Lectins	9.28658e-47	64.17	XP_023313177.1	cytochrome P450 4C1-like isoform X2	1.28808e-119	94.18
JPS_TRINITY_DN17958_c0_g1	1020	0.00937052	C-Type Lectins	1.32975e-41	50.99	XP_023311566.1	cytochrome P450 4c3-like	6.04574e-174	94.01
JPS_TRINITY_DN18360_c0_g1	1542	-1.73644	C-Type Lectins	2.44218e-38	47.92	XP_018576754.1	cytochrome P450 6a2 isoform X1	0	91.41
JPS_TRINITY_DN3647_c0_g1	1518	-1.22061	C-Type Lectins	3.96306e-37	47.01	XP_023310525.1	cytochrome P450 6a2-like isoform X1	0	94.26
JPS_TRINITY_DN323_c0_g1	1536	0.376257	C-Type Lectins	4.11893e-37	47.59	XP_018576939.1	probable cytochrome P450 6a14	0	90.77
JPS_TRINITY_DN28810_c0_g1	363	-1.78894	C-Type Lectins	6.49594e-37	70.94	XP_018563755.1	cytochrome P450 4C1-like	3.80053e-71	95.76
JPS_TRINITY_DN202_c0_g1	1524	-1.83498	C-Type Lectins	2.25806e-36	47.7	XP_018576951.1	probable cytochrome P450 6a13	0	89.26
JPS_TRINITY_DN43931_c0_g1	1152	-2.0048	C-Type Lectins	5.66334e-36	46.51	XP_018573006.1	probable cytochrome P450 6a13	0	91.03
JPS_TRINITY_DN323_c0_g2	1539	-1.39981	C-Type Lectins	6.74912e-36	47.79	XP_018577035.1	cytochrome P450 6a2 isoform X1	0	91.41
JPS_TRINITY_DN18360_c0_g2	624	0.160874	C-Type Lectins	1.30256e-34	57.14	JAB63659.1	Cytochrome P450 6a2	1.94194e-129	92.72
JPS_TRINITY_DN24485_c0_g1	1512	0.619721	C-Type Lectins	8.22823e-33	47.2	XP_018561047.1	cytochrome P450 6k1	0	89.58
JPS_TRINITY_DN1448_c0_g1	1521	-1.04546	C-Type Lectins	1.02111e-32	60.11	XP_018576707.1	uncharacterized protein LOC108915211	0	84.96
JPS_TRINITY_DN11543_c0_g1	1533	0.15847	C-Type Lectins	1.10834e-32	47.91	XP_018576919.1	probable cytochrome P450 6a14 isoform X2	0	90.94
JPS_TRINITY_DN323_c1_g2	1407	0.531845	C-Type Lectins	2.4886e-32	58.08	JAB63541.1	putative cytochrome P450 6a14	0	94.24
JPS_TRINITY_DN509_c0_g1	1539	0.577547	C-Type Lectins	2.50328e-32	45.23	XP_023311081.1	probable cytochrome P450 6a14	0	93.19
JPS_TRINITY_DN11239_c0_g1	1527	0.0143019	C-Type Lectins	3.89228e-32	46.3	XP_023310272.1	probable cytochrome P450 6a13	0	90.73
JPS_TRINITY_DN3259_c0_g1	435	0.655949	C-Type Lectins	8.21374e-32	60.42	XP_023309753.1	cytochrome P450 4V2-like isoform X2	1.76735e-71	86.71
JPS_TRINITY_DN4272_c0_g1	1566	0.267884	C-Type Lectins	6.19845e-31	49.19	JAB64887.1	putative cytochrome P450 6a14	0	92.11
JPS_TRINITY_DN28810_c1_g2	297	-2.65376	C-Type Lectins	7.61251e-31	70.83	XP_018563755.1	cytochrome P450 4C1-like	2.367e-57	95.92
JPS_TRINITY_DN202_c1_g1	1539	0.141088	C-Type Lectins	1.44511e-30	46.61	XP_018576939.1	probable cytochrome P450 6a14	0	85.35
JPS_TRINITY_DN628_c0_g1	1527	-0.344477	C-Type Lectins	2.07245e-30	45.8	XP_023311082.1	probable cytochrome P450 6a13	0	91.34
JPS_TRINITY_DN3712_c0_g1	1563	0.930263	C-Type Lectins	2.3122e-30	54.37	XP_018571700.1	probable cytochrome P450 6a20	0	91.81
JPS_TRINITY_DN2337_c0_g1	1548	0.138536	C-Type Lectins	3.40151e-30	56.46	XP_023311076.1	probable cytochrome P450 6a14	0	84.8
JPS_TRINITY_DN9033_c0_g1	588	0.809512	C-Type Lectins	9.41036e-30	54.84	JAB63394.1	putative cytochrome P450 6a14	7.88676e-108	87.69
JPS_TRINITY_DN332_c0_g1	1512	0.35867	C-Type Lectins	1.75064e-29	48.79	XP_018561047.1	cytochrome P450 6k1	0	84.91
JPS_TRINITY_DN823_c0_g1	1509	-0.944617	C-Type Lectins	3.18231e-29	44.26	XP_018574914.2	cytochrome P450 6A1-like	0	88.27
JPS_TRINITY_DN9100_c0_g1	1500	-0.758059	C-Type Lectins	1.45826e-27	44.53	XP_018562134.1	cytochrome P450 6k1 isoform X2	0	96.79
JPS_TRINITY_DN8968_c0_g1	1569	0.399383	C-Type Lectins	1.52076e-27	44.31	AKZ17699.1	cytochrome P450 monooxygenase CYP9AD2	0	70.22
JPS_TRINITY_DN25498_c0_g1	1605	1.02637	C-Type Lectins	1.45618e-26	45	XP_018573794.1	cytochrome P450 9e2	0	87.57
JPS_TRINITY_DN7834_c0_g1	1554	1.05986	C-Type Lectins	3.08743e-25	52.16	XP_018571698.1	cytochrome P450 6a2	0	97.68
JPS_TRINITY_DN13588_c0_g1	1176	-0.52245	C-Type Lectins	1.2407e-24	45.77	XP_018561868.1	unnamed protein product	0	79.8
JPS_TRINITY_DN19601_c0_g1	1545	0.783929	C-Type Lectins	3.83008e-24	52.78	XP_018571699.1	cytochrome P450 6a8-like	0	89.59
JPS_TRINITY_DN19601_c0_g2	1545	1.3518	C-Type Lectins	5.00991e-24	52.13	XP_018571699.1	cytochrome P450 6a8-like	0	91.41
JPS_TRINITY_DN14892_c0_g1	1464	-1.60005	C-Type Lectins	5.21796e-24	57.45	XP_018576919.1	probable cytochrome P450 6a14 isoform X2	0	87.98
JPS_TRINITY_DN3578_c1_g2	1056	-0.104015	C-Type Lectins	1.75095e-22	53.93	XP_023312541.1	cytochrome P450 9e2-like	0	88.54
JPS_TRINITY_DN3578_c0_g1	1623	0.221194	C-Type Lectins	4.65112e-22	48.09	XP_018561888.1	cytochrome P450 9e2-like	0	89.88
JPS_TRINITY_DN898_c1_g2	1470	0.934449	C-Type Lectins	1.66767e-21	50	XP_018565210.1	cytochrome P450 6j1	0	84.62
JPS_TRINITY_DN107_c0_g1	1587	0.543953	C-Type Lectins	3.42798e-21	44.33	XP_023310982.1	uncharacterized protein LOC108904004	0	94.49
JPS_TRINITY_DN11832_c0_g1	1503	0.148681	C-Type Lectins	6.70921e-21	49.81	XP_018564384.1	cytochrome P450 306a1	0	91.88
JPS_TRINITY_DN10889_c0_g1	1479	1.23357	C-Type Lectins	6.94032e-21	50.27	XP_018574350.1	uncharacterized protein LOC108913304	0	97.76
JPS_TRINITY_DN3077_c0_g1	828	1.10272	C-Type Lectins	1.05229e-20	49.38	JAB64032.1	Cytochrome P450 9e2	1.13665e-149	89.01
JPS_TRINITY_DN31427_c0_g1	1521	0.368306	C-Type Lectins	1.21888e-20	49.76	XP_018574126.1	cytochrome P450 302a1, mitochondrial-like	0	95.06
JPS_TRINITY_DN5768_c0_g1	1545	-0.450703	C-Type Lectins	1.01681e-19	56.64	XP_018561044.1	cytochrome P450 6k1-like isoform X2	0	93.84
JPS_TRINITY_DN22845_c0_g3	1563	1.1636	C-Type Lectins	4.49847e-19	52.4	XP_018565133.1	uncharacterized protein LOC108906388	0	87.06
JPS_TRINITY_DN143359_c0_g1	1386	-0.125822	C-Type Lectins	8.33998e-19	47.17	XP_018578926.1	cytochrome P450 315a1, mitochondrial	0	95.24
JPS_TRINITY_DN4657_c0_g2	366	-0.190977	C-Type Lectins	4.14993e-18	56.2	XP_023310211.1	cytochrome P450 4d2-like	5.95976e-79	99.17
JPS_TRINITY_DN10847_c0_g1	345	-0.820789	C-Type Lectins	5.30112e-18	59.38	XP_018576951.1	probable cytochrome P450 6a13	2.13967e-58	88.6
JPS_TRINITY_DN9694_c0_g2	1614	0.993835	C-Type Lectins	9.18258e-18	51.45	XP_018572395.1	cytochrome P450 CYP12A2	0	89.96
JPS_TRINITY_DN2422_c0_g2	1656	0.484758	C-Type Lectins	2.34446e-17	50	XP_018570997.1	probable cytochrome P450 49a1	0	95.1
JPS_TRINITY_DN31207_c0_g1	1464	1.16123	C-Type Lectins	2.42293e-17	45.07	XP_018565210.1	cytochrome P450 6j1	0	91.03
JPS_TRINITY_DN823_c0_g2	1344	-0.303085	C-Type Lectins	3.39536e-17	42.73	XP_018574914.2	cytochrome P450 6A1-like	0	90.36
JPS_TRINITY_DN5740_c0_g1	1620	0.180883	C-Type Lectins	6.03841e-17	53.53	XP_018567976.1	probable cytochrome P450 12a4, mitochondrial	0	89.07
JPS_TRINITY_DN24046_c0_g1	453	-0.320558	C-Type Lectins	1.16143e-16	59.26	XP_018576951.1	probable cytochrome P450 6a13	1.90415e-84	90.91
JPS_TRINITY_DN13321_c0_g1	513	0.452445	C-Type Lectins	9.08139e-16	49.68	XP_018561888.1	cytochrome P450 9e2-like	4.56996e-102	92.17
JPS_TRINITY_DN12835_c0_g1	1593	1.10225	C-Type Lectins	1.6094e-14	48.84	XP_018561868.1	unnamed protein product	0	89.2
JPS_TRINITY_DN143418_c0_g1	1527	-1.62979	C-Type Lectins	1.23107e-13	44.39	XP_018577799.1	ecdysone 20-monooxygenase	0	97.96
JPS_TRINITY_DN4051_c0_g1	438	-0.502546	C-Type Lectins	2.30861e-13	50	XP_018568698.1	probable cytochrome P450 49a1	1.2167e-96	97.24
JPS_TRINITY_DN34466_c0_g1	429	-0.863243	C-Type Lectins	8.29407e-13	63.49	XP_023310973.1	cytochrome P450 9e2-like	1.80425e-67	88.03
JPS_TRINITY_DN107_c1_g2	1401	-0.392401	C-Type Lectins	9.6026e-13	48.45	XP_018561892.2	uncharacterized protein LOC108904010	0	90.36
JPS_TRINITY_DN2003_c0_g1	1482	-0.317373	C-Type Lectins	1.23975e-12	45.12	XP_018574350.1	uncharacterized protein LOC108913304	0	90.67
JPS_TRINITY_DN3181_c0_g1	1782	1.45885	C-Type Lectins	2.15573e-12	50.69	XP_023019969.1	probable cytochrome P450 301a1, mitochondrial	0	78.08
JPS_TRINITY_DN12134_c0_g1	1434	0.925734	C-Type Lectins	3.78555e-11	49.58	XP_018577263.1	probable cytochrome P450 49a1	0	94.04
JPS_TRINITY_DN8286_c0_g1	978	0.590729	C-Type Lectins	4.01193e-11	46.92	XP_018561986.1	cytochrome P450 4C1-like isoform X2	9.13812e-167	83.33
JPS_TRINITY_DN17668_c0_g1	318	-0.6886	C-Type Lectins	2.80672e-08	61.9	XP_018568722.1	probable cytochrome P450 301a1, mitochondrial	1.91211e-57	97.87
JPS_TRINITY_DN144185_c0_g1	468	-0.819532	C-Type Lysozymes	4.25296e-34	61.11	XP_035908481.1	lysozyme c-1-like	5.3966e-32	62.99
JPS_TRINITY_DN3032_c0_g1	423	0.240724	C-Type Lysozymes	2.35782e-44	68.64	XP_018579992.1	lysozyme-like	6.56929e-79	97.56
JPS_TRINITY_DN6480_c0_g1	543	-3.85554	C-Type Lysozymes	1.96738e-35	64.1	XP_018579991.1	lysozyme	3.91192e-80	88.39
JPS_TRINITY_DN4792_c0_g1	408	-2.35726	C-Type Lysozymes	3.1567e-47	64.63	XP_018566916.1	lysozyme P-like	3.04567e-88	94.81
JPS_TRINITY_DN5166_c0_g1	444	0.518622	C-Type Lysozymes	2.17428e-45	69.29	XP_018566901.1	lysozyme c-1-like	5.3757e-84	89.04
JPS_TRINITY_DN537_c0_g1	435	3.568	C-Type Lysozymes	9.51544e-60	71.62	XP_018562961.1	lysozyme c-1-like	7.44846e-98	96.53
JPS_TRINITY_DN15901_c0_g1	954	0.260942	Defensins FBgn0129508	6.43153e-07	40.41	XP_018561405.1	neurogenic locus protein delta-like	0	96.55
JPS_TRINITY_DN261_c0_g1	1056	0.817637	Defensins FBgn0166718	6.54402e-06	35.82	XP_018573880.1	von Willebrand factor D and EGF domain-containing protein-like isoform X1	0	94.92
JPS_TRINITY_DN3635_c0_g1	2253	1.31621	Fibrinogen Related Proteins	3.05506e-66	57.78	XP_018570121.1	fibroblast growth factor receptor homolog 1 isoform X2	0	97.33
JPS_TRINITY_DN3635_c0_g3	1653	0.486906	Fibrinogen Related Proteins	6.78909e-66	58.92	XP_018565011.1	fibroblast growth factor receptor homolog 1-like isoform X2	0	94.77
JPS_TRINITY_DN2095_c0_g1	1530	0.687657	Fibrinogen Related Proteins	9.05297e-59	58.03	JAB65997.1	Tyrosine-protein kinase	0	97.84
JPS_TRINITY_DN2880_c0_g1	3609	-0.545589	Fibrinogen Related Proteins	4.28162e-58	53.16	XP_018568546.1	focal adhesion kinase 1 isoform X4	0	98.31
JPS_TRINITY_DN1805_c0_g1	8511	1.32359	Fibrinogen Related Proteins	5.57107e-32	49.29	XP_023311896.1	uncharacterized protein LOC108913857 isoform X1	0	73.82
JPS_TRINITY_DN36875_c0_g1	1593	1.37213	Fibrinogen Related Proteins	9.7807e-55	49.55	XP_018575102.1	zinc finger protein OZF-like	0	92.09
JPS_TRINITY_DN5786_c0_g1	783	1.04987	Fibrinogen Related Proteins	1.96683e-54	54.55	XP_018575927.1	zinc finger protein 260-like	0	100
JPS_TRINITY_DN4100_c0_g1	2043	1.26787	Fibrinogen Related Proteins	5.18091e-54	49.16	XP_018572303.1	transcriptional repressor CTCF isoform X2	0	99.56
JPS_TRINITY_DN109_c0_g1	2508	1.14527	Fibrinogen Related Proteins	2.42925e-48	50.49	XP_018568013.1	uncharacterized protein LOC108908457	0	96.88
JPS_TRINITY_DN48011_c0_g1	990	-1.74181	Fibrinogen Related Proteins	5.97594e-48	47.25	XP_023310867.1	zinc finger protein 721	2.51148e-150	79.75
JPS_TRINITY_DN26245_c0_g1	1590	0.285575	Fibrinogen Related Proteins	1.61989e-46	58.48	XP_018575408.1	Krueppel homolog 1-like isoform X1	0	95.85
JPS_TRINITY_DN20747_c0_g2	927	0.726189	Fibrinogen Related Proteins	3.10791e-44	47.08	XP_018335333.1	zinc finger protein draculin isoform X24	2.37966e-81	62.54
JPS_TRINITY_DN8566_c0_g1	1308	0.872519	Fibrinogen Related Proteins	2.30778e-43	52.29	XP_018566593.1	zinc finger protein OZF	0	98.62
JPS_TRINITY_DN5359_c1_g1	918	1.71951	Fibrinogen Related Proteins	4.36291e-43	48.3	KAF7286010.1	hypothetical protein	3.47258e-73	61.92
JPS_TRINITY_DN18111_c0_g1	984	0.912297	Fibrinogen Related Proteins	4.4407e-42	46.41	XP_023310867.1	zinc finger protein 721	0	98.65
JPS_TRINITY_DN109_c0_g2	2586	1.27563	Fibrinogen Related Proteins	5.13554e-42	50.16	XP_018568013.1	uncharacterized protein LOC108908457	0	89.89
JPS_TRINITY_DN20747_c0_g5	1233	0.890646	Fibrinogen Related Proteins	2.18544e-41	47.6	XP_028128724.1	zinc finger protein 260-like	3.78792e-166	79.89
JPS_TRINITY_DN3778_c0_g1	3096	0.999528	Fibrinogen Related Proteins	8.69073e-41	44.41	XP_018569446.1	zinc finger protein 658	0	96.71
JPS_TRINITY_DN2009_c0_g1	1509	2.04943	Fibrinogen Related Proteins	2.72563e-40	49.03	XP_018563324.1	zinc finger protein 484-like isoform X1	0	96.41
JPS_TRINITY_DN4197_c1_g2	1284	0.586877	Fibrinogen Related Proteins	8.36336e-40	52.33	XP_019875431.1	zinc finger protein 665-like	0	86.44
JPS_TRINITY_DN120252_c0_g1	801	0.248646	Fibrinogen Related Proteins	1.82308e-39	49.65	KAF7286010.1	hypothetical protein	2.72681e-80	65.92
JPS_TRINITY_DN22840_c1_g1	897	0.821396	Fibrinogen Related Proteins	5.50856e-39	49.64	KAF7286010.1	hypothetical protein	4.57464e-85	62.63
JPS_TRINITY_DN7324_c3_g1	1284	-0.0542457	Fibrinogen Related Proteins	5.65147e-39	43.11	XP_018575724.1	zinc finger protein 271-like	0	97.83
JPS_TRINITY_DN3158_c1_g1	1113	0.0663241	Fibrinogen Related Proteins	1.8097e-38	47.31	XP_018575724.1	zinc finger protein 271-like	0	97.38
JPS_TRINITY_DN2092_c0_g1	2082	1.62636	Fibrinogen Related Proteins	4.45941e-38	49.29	XP_018566354.1	zinc finger protein 184	0	94.74
JPS_TRINITY_DN13659_c0_g1	1353	1.1424	Fibrinogen Related Proteins	1.61296e-37	48.63	XP_018576247.1	gastrula zinc finger protein XlCGF28.1-like isoform X1	0	92.29
JPS_TRINITY_DN20747_c0_g3	1209	1.1131	Fibrinogen Related Proteins	2.91974e-37	44.21	XP_018575723.1	zinc finger protein 239-like	0	97.4
JPS_TRINITY_DN15835_c1_g1	1104	-0.255547	Fibrinogen Related Proteins	5.12715e-36	49.03	XP_018575728.1	zinc finger protein 208-like	0	96.39
JPS_TRINITY_DN15775_c0_g1	960	0.0462528	Fibrinogen Related Proteins	9.81126e-36	48.59	XP_023310865.1	zinc finger protein 585A	0	98.68
JPS_TRINITY_DN1133_c0_g1	3159	-0.0927325	Fibrinogen Related Proteins	3.39654e-34	43.99	XP_018562296.1	zinc finger protein 33A	0	98.1
JPS_TRINITY_DN6239_c0_g1	1293	1.7954	Fibrinogen Related Proteins	1.41314e-33	44.83	XP_018565949.1	zinc finger protein 585A-like	0	96.06
JPS_TRINITY_DN41926_c0_g3	810	0.0672626	Fibrinogen Related Proteins	1.92086e-33	46.74	KAF7286010.1	hypothetical protein	3.93389e-91	67.67
JPS_TRINITY_DN17329_c0_g1	1461	1.77207	Fibrinogen Related Proteins	1.96238e-33	48.44	XP_018574205.1	zinc finger protein 585B-like	0	91.11
JPS_TRINITY_DN37054_c0_g3	996	0.605917	Fibrinogen Related Proteins	2.08093e-33	46.81	XP_018575728.1	zinc finger protein 208-like	3.41003e-163	95.75
JPS_TRINITY_DN12164_c0_g1	960	-1.11836	Fibrinogen Related Proteins	7.00895e-33	49.14	XP_018575732.1	zinc finger protein 239-like	0	92.57
JPS_TRINITY_DN7544_c0_g1	639	-0.632546	Fibrinogen Related Proteins	1.42586e-28	50.51	XP_028128730.1	zinc finger protein 28-like	7.00877e-106	84.91
JPS_TRINITY_DN1184_c0_g1	2166	0.128045	Fibrinogen Related Proteins	5.54139e-27	42.35	XP_023310164.1	zinc finger protein 557 isoform X4	0	78.35
JPS_TRINITY_DN4397_c0_g1	2493	1.20305	Fibrinogen Related Proteins	1.25512e-24	42.28	XP_018573697.1	zinc finger protein 630 isoform X1	0	98.92
JPS_TRINITY_DN85423_c0_g1	2217	1.54292	Fibrinogen Related Proteins	1.34475e-24	43.55	XP_018562512.1	oocyte zinc finger protein XlCOF6-like isoform X1	0	86.68
JPS_TRINITY_DN4625_c0_g2	1152	1.29592	Fibrinogen Related Proteins	2.08187e-17	40.17	XP_018568400.1	zinc finger protein 845-like	8.33403e-118	70.89
JPS_TRINITY_DN2305_c0_g3	1599	1.49421	Fibrinogen Related Proteins	3.39507e-16	41.9	XP_018568400.1	zinc finger protein 845-like	1.13338e-95	60.37
JPS_TRINITY_DN703_c0_g1	2091	2.05479	Fibrinogen Related Proteins	7.70411e-15	40.17	XP_018567897.1	zinc finger protein 431-like	0	66.52
JPS_TRINITY_DN11017_c0_g1	1500	2.05712	Fibrinogen Related Proteins	1.5746e-14	39.63	XP_018568413.1	zinc finger protein 91-like	6.2166e-87	53.32
JPS_TRINITY_DN6050_c1_g2	1353	1.87253	Fibrinogen Related Proteins	1.33016e-12	42.35	XP_018568413.1	zinc finger protein 91-like	1.96978e-107	66.58
JPS_TRINITY_DN245_c0_g1	3345	1.54411	Fibrinogen Related Proteins	1.54235e-12	38.76	XP_018574091.1	zinc finger protein 91-like isoform X2	0	95.18
JPS_TRINITY_DN4586_c0_g3	1818	1.64895	Fibrinogen Related Proteins	1.1727e-11	40.94	XP_018567897.1	zinc finger protein 431-like	0	64.91
JPS_TRINITY_DN4211_c0_g1	1038	1.46532	Fibrinogen Related Proteins	3.11914e-10	44.52	XP_018568400.1	zinc finger protein 845-like	2.30105e-90	64.44
JPS_TRINITY_DN6863_c0_g4	825	1.98154	Fibrinogen Related Proteins	1.73519e-09	43.14	XP_018568369.1	zinc finger protein 761-like	8.74983e-84	70.96
JPS_TRINITY_DN4298_c0_g2	1458	1.18183	Fibrinogen Related Proteins	3.96515e-09	44.33	XP_018576227.1	zinc finger protein 43-like	7.23132e-60	62.36
JPS_TRINITY_DN3780_c0_g2	1209	2.12261	Fibrinogen Related Proteins	1.79971e-08	41.94	XP_018568400.1	zinc finger protein 845-like	4.15819e-59	57.14
JPS_TRINITY_DN67271_c1_g1	612	1.75692	Fibrinogen Related Proteins	5.13726e-08	41.9	XP_018568400.1	zinc finger protein 845-like	2.32316e-57	70
JPS_TRINITY_DN11368_c0_g2	609	0.488769	Fibrinogen Related Proteins	7.076e-08	45.1	XP_018568400.1	zinc finger protein 845-like	9.84122e-42	66.46
JPS_TRINITY_DN36401_c0_g2	456	0.611563	Fibrinogen Related Proteins	1.95525e-07	44.29	XP_018568400.1	zinc finger protein 845-like	4.86053e-54	76.32
JPS_TRINITY_DN4367_c0_g3	663	1.37357	Fibrinogen Related Proteins	3.19224e-07	45.68	XP_018568400.1	zinc finger protein 845-like	9.02184e-69	72.33
JPS_TRINITY_DN4625_c0_g1	471	1.52238	Fibrinogen Related Proteins	4.79366e-07	45.89	XP_018568400.1	zinc finger protein 845-like	1.17414e-51	70.97
JPS_TRINITY_DN9580_c0_g1	936	1.57378	Fibrinogen Related Proteins	4.99429e-07	37.86	XP_018568400.1	zinc finger protein 845-like	4.1909e-79	58.31
JPS_TRINITY_DN9620_c0_g1	330	1.61572	Fibrinogen Related Proteins	8.95485e-07	52.22	XP_018568413.1	zinc finger protein 91-like	7.65266e-28	70.37
JPS_TRINITY_DN4966_c3_g1	315	0.745494	Fibrinogen Related Proteins	1.22528e-06	49.41	XP_018568400.1	zinc finger protein 845-like	5.80391e-29	74.49
JPS_TRINITY_DN4586_c0_g2	957	0.0930015	Fibrinogen Related Proteins	4.72772e-06	49.51	XP_018573528.1	zinc finger protein 286A-like	3.49713e-98	66.87
JPS_TRINITY_DN5779_c0_g2	411	0.828212	Fibrinogen Related Proteins	5.09982e-06	46.23	XP_018568369.1	zinc finger protein 761-like	1.86609e-46	76.09
JPS_TRINITY_DN6428_c1_g1	447	2.53556	Fibrinogen Related Proteins	9.68697e-06	43.28	XP_023312813.1	zinc finger protein 90-like	1.34152e-55	77.7
JPS_TRINITY_DN3857_c0_g1	1107	-2.11877	Fibrinogen Related Proteins	1.2299e-18	50.35	XP_018565483.1	zinc finger protein GLIS2 homolog isoform X2	0	97.01
JPS_TRINITY_DN14702_c0_g1	1614	-1.60024	Fibrinogen Related Proteins	3.04392e-11	66.67	XP_018567032.1	zinc finger protein 37	0	98.66
JPS_TRINITY_DN23247_c0_g1	5421	0.6991	Fibrinogen Related Proteins	2.02691e-08	41.74	XP_018562876.1	uncharacterized protein LOC108904712	0	94.76
JPS_TRINITY_DN5105_c0_g4	693	1.98367	Fibrinogen Related Proteins	3.09089e-06	48.81	XP_018568381.1	zinc finger protein 26-like	5.50452e-45	60
JPS_TRINITY_DN14587_c2_g1	531	0.272027	Fibrinogen Related Proteins	5.62698e-06	37.02	XP_023311489.1	zinc finger protein 90-like	3.15809e-52	66.67
JPS_TRINITY_DN120314_c0_g1	927	0.262193	Fibrinogen Related Proteins	8.41856e-23	51.6	XP_018569112.1	proteasome subunit beta type-5	0	98.57
JPS_TRINITY_DN5051_c0_g1	414	-1.88973	Fibrinogen Related Proteins	1.68001e-06	50.75	XP_018565408.1	ephrin type-B receptor 1-B isoform X3	3.54795e-89	100
JPS_TRINITY_DN32164_c0_g1	339	-1.53119	Fibrinogen Related Proteins	2.56939e-06	64.29	KAF0746556.1	Uncharacterized protein	3.21324e-16	62.5
JPS_TRINITY_DN7934_c0_g2	1296	-2.6542	Fibrinogen Related Proteins	1.0518e-24	64.29	KAF0760196.1	DUF659 domain-containing protein	7.28665e-114	62.1
JPS_TRINITY_DN610_c0_g2	1206	-0.860266	Fibrinogen Related Proteins	8.4702e-21	44.9	XP_022173650.1	uncharacterized protein LOC111036064	1.7666e-62	58.21
JPS_TRINITY_DN320_c0_g2	1449	1.59125	Fibrinogen Related Proteins	2.2316e-20	42.13	KAF0760196.1	DUF659 domain-containing protein	6.90398e-99	58.67
JPS_TRINITY_DN68335_c0_g1	591	-0.630668	Fibrinogen Related Proteins	3.49958e-19	58.49	XP_025205679.1	uncharacterized protein LOC112601985	9.72688e-59	68.82
JPS_TRINITY_DN76178_c0_g1	297	-2.8964	Fibrinogen Related Proteins	1.20127e-14	64.41	PSN41311.1	hypothetical protein	1.72256e-38	80
JPS_TRINITY_DN11221_c0_g2	393	-1.66592	Fibrinogen Related Proteins	1.358e-07	39.52	PSN40041.1	hypothetical protein	9.25949e-33	64.52
JPS_TRINITY_DN6626_c0_g1	468	-2.62212	Fibrinogen Related Proteins	1.53479e-07	50	XP_031343081.1	uncharacterized protein LOC116170717	4.1659e-12	53.15
JPS_TRINITY_DN22996_c0_g1	456	-0.494264	Fibrinogen Related Proteins	2.05231e-48	65.75	XP_018570034.1	zinc finger protein 239-like	1.93524e-93	93.96
JPS_TRINITY_DN119885_c0_g1	2166	0.877356	Fibrinogen Related Proteins	1.0064e-41	63.03	XP_018576344.1	zinc finger protein 878	0	96.62
JPS_TRINITY_DN6636_c0_g1	900	1.88063	Fibrinogen Related Proteins	1.1479e-40	59.26	XP_018572770.1	zinc finger protein 143-like	0	96.68
JPS_TRINITY_DN10987_c0_g1	2556	-0.613552	Fibrinogen Related Proteins	9.27436e-35	60.81	XP_018563208.1	PR domain zinc finger protein 1 isoform X1	0	98.71
JPS_TRINITY_DN14096_c0_g1	1089	-1.2231	Fibrinogen Related Proteins	1.00409e-34	57.89	XP_018563172.1	zinc finger protein 358-like	0	100
JPS_TRINITY_DN12449_c0_g2	1416	1.75059	Fibrinogen Related Proteins	2.77211e-34	57.83	XP_018576704.1	gastrula zinc finger protein XlCGF28.1-like	0	90.32
JPS_TRINITY_DN7738_c0_g1	1893	0.0408735	Fibrinogen Related Proteins	4.8137e-33	52.33	XP_018563604.1	protein bowel	0	96.19
JPS_TRINITY_DN41144_c0_g1	954	1.23664	Fibrinogen Related Proteins	1.23072e-32	45.73	XP_018575728.1	zinc finger protein 208-like	1.99803e-156	93.07
JPS_TRINITY_DN1923_c0_g2	411	0.575248	Fibrinogen Related Proteins	3.03759e-32	66.67	JAB61733.1	Zinc finger protein	1.86011e-78	90.98
JPS_TRINITY_DN22840_c0_g1	537	-0.268471	Fibrinogen Related Proteins	3.45742e-32	51.83	KAF7286010.1	hypothetical protein	1.41803e-57	65.52
JPS_TRINITY_DN4271_c0_g1	1260	1.25837	Fibrinogen Related Proteins	3.87008e-32	52.33	XP_018566314.1	zinc finger protein 596	0	87.83
JPS_TRINITY_DN10723_c0_g1	1674	0.846452	Fibrinogen Related Proteins	6.39256e-32	53.18	XP_023313232.1	zinc finger protein 271-like	0	90.89
JPS_TRINITY_DN5090_c0_g2	459	-0.639797	Fibrinogen Related Proteins	1.04172e-28	63.81	XP_023311432.1	zinc finger protein 391-like	1.94247e-104	96.73
JPS_TRINITY_DN20747_c0_g1	1065	0.679149	Fibrinogen Related Proteins	1.75681e-26	52.66	XP_018575728.1	zinc finger protein 208-like	0	91.69
JPS_TRINITY_DN109_c1_g3	450	2.4892	Fibrinogen Related Proteins	2.24379e-22	56.03	XP_018568013.1	uncharacterized protein LOC108908457	5.0754e-63	88.67
JPS_TRINITY_DN86092_c0_g1	1092	-0.771987	Fibrinogen Related Proteins	7.83201e-22	54.69	XP_018569313.1	fez family zinc finger protein 1-like	0	97.8
JPS_TRINITY_DN9271_c0_g1	1476	0.20239	Fibrinogen Related Proteins	2.55787e-20	56.03	XP_018568345.1	early growth response protein 1	0	97.59
JPS_TRINITY_DN1502_c1_g1	336	0.0517395	Fibrinogen Related Proteins	2.90636e-20	60	XP_018564083.1	uncharacterized protein LOC108905612	1.08854e-70	97.3
JPS_TRINITY_DN3975_c0_g1	1719	-0.768858	Fibrinogen Related Proteins	1.69975e-18	57	XP_018579268.2	early growth response protein 1-B isoform X2	0	97.4
JPS_TRINITY_DN7387_c0_g1	1854	0.285974	Fibrinogen Related Proteins	7.97036e-18	66.67	XP_018570317.1	transcription factor Sp4-like	0	98.54
JPS_TRINITY_DN88901_c0_g1	792	-1.96952	Fibrinogen Related Proteins	2.7581e-17	66.29	XP_018561905.1	transcription factor Sp4-like	2.52214e-178	96.24
JPS_TRINITY_DN2729_c0_g1	876	-1.2433	Fibrinogen Related Proteins	2.47839e-16	54.72	XP_018574173.1	Krueppel-like factor 9	0	97.25
JPS_TRINITY_DN6794_c0_g1	1143	-0.704117	Fibrinogen Related Proteins	2.91413e-16	60.71	XP_018565028.1	pair-rule protein odd-paired	0	98.68
JPS_TRINITY_DN15710_c0_g2	3009	-1.05456	Fibrinogen Related Proteins	4.62935e-16	58.95	XP_018567649.1	transcriptional activator cubitus interruptus	0	91.2
JPS_TRINITY_DN2264_c0_g1	714	-1.62591	Fibrinogen Related Proteins	1.04845e-15	61.18	XP_018562571.1	Krueppel-like factor 7 isoform X1	1.25719e-157	97.05
JPS_TRINITY_DN8443_c0_g1	1368	0.632327	Fibrinogen Related Proteins	1.29881e-15	61.45	XP_023310486.1	zinc finger protein 226	0	97.45
JPS_TRINITY_DN78128_c0_g1	549	-0.50028	Fibrinogen Related Proteins	9.52848e-15	50	XP_018575731.1	gastrula zinc finger protein XlCGF7.1-like	4.79569e-76	98.26
JPS_TRINITY_DN109_c1_g4	996	1.1994	Fibrinogen Related Proteins	1.05027e-14	50.86	XP_018568013.1	uncharacterized protein LOC108908457	2.3794e-113	75.15
JPS_TRINITY_DN119736_c0_g1	741	1.19678	Fibrinogen Related Proteins	2.25402e-14	57.69	XP_018580187.1	zinc finger protein 25-like	1.13071e-130	88.84
JPS_TRINITY_DN1108_c1_g1	1566	-0.577342	Fibrinogen Related Proteins	2.41131e-14	47.97	XP_018575376.1	zinc finger protein 773-like isoform X2	0	99.81
JPS_TRINITY_DN11535_c1_g1	2763	1.25895	Fibrinogen Related Proteins	2.90091e-14	53.06	XP_023309886.1	zinc finger E-box-binding homeobox protein zag-1	0	97.87
JPS_TRINITY_DN2549_c3_g1	1425	-3.89472	Fibrinogen Related Proteins	3.01033e-14	59.14	XP_018562795.1	PR domain zinc finger protein 16	0	99.36
JPS_TRINITY_DN11183_c0_g1	993	3.00739	Fibrinogen Related Proteins	1.03816e-13	46.95	XP_018579459.1	transcription factor IIIA	5.23626e-160	91.72
JPS_TRINITY_DN6039_c0_g1	4671	0.199368	Fibrinogen Related Proteins	1.86964e-12	40.4	XP_023310444.1	uncharacterized protein LOC108908138	0	97.62
JPS_TRINITY_DN8330_c0_g4	645	2.05604	Fibrinogen Related Proteins	4.76101e-11	47.09	XP_018568400.1	zinc finger protein 845-like	8.61664e-71	73.85
JPS_TRINITY_DN8099_c2_g1	1065	-0.235365	Fibrinogen Related Proteins	3.07047e-09	55.88	XP_018568720.1	zinc finger protein 883 isoform X2	1.14142e-108	97.62
JPS_TRINITY_DN11329_c0_g1	852	2.42689	Fibrinogen Related Proteins	7.7626e-09	46.62	XP_018578472.1	zinc finger protein 90-like isoform X2	7.10171e-107	76.47
JPS_TRINITY_DN867_c0_g1	465	1.751	Fibrinogen Related Proteins	1.38497e-08	46.04	XP_018568400.1	zinc finger protein 845-like	1.30754e-44	70.37
JPS_TRINITY_DN11017_c2_g1	324	1.88108	Fibrinogen Related Proteins	2.78584e-08	49.4	XP_023310761.1	zinc finger protein 184-like	1.22735e-30	73.83
JPS_TRINITY_DN6972_c2_g5	417	0.299904	Fibrinogen Related Proteins	2.71513e-07	43.51	XP_018568400.1	zinc finger protein 845-like	1.52353e-46	75.36
JPS_TRINITY_DN1737_c0_g2	1794	0.430604	Fibrinogen Related Proteins	4.13754e-07	40.11	XP_018564660.1	myoneurin-like	0	91.79
JPS_TRINITY_DN3339_c2_g3	534	1.43677	Fibrinogen Related Proteins	4.21588e-07	43.5	XP_018568413.1	zinc finger protein 91-like	6.75226e-51	68.68
JPS_TRINITY_DN867_c0_g4	453	2.22988	Fibrinogen Related Proteins	4.48012e-07	44.97	XP_018568400.1	zinc finger protein 845-like	1.57809e-47	71.81
JPS_TRINITY_DN7074_c0_g1	468	0.836131	Fibrinogen Related Proteins	5.10685e-07	44.37	XP_018568400.1	zinc finger protein 845-like	2.28452e-38	64.94
JPS_TRINITY_DN6087_c0_g1	495	2.33195	Fibrinogen Related Proteins	3.1794e-06	47.27	XP_018577358.1	putative zinc finger protein 66	1.04254e-39	70.95
JPS_TRINITY_DN6535_c0_g1	2982	-1.44535	Fibrinogen Related Proteins	1.01291e-88	49.39	JAB65911.1	Zinc finger protein	0	97.38
JPS_TRINITY_DN42929_c0_g1	1824	1.28228	Fibrinogen Related Proteins	4.35975e-61	42.35	XP_018576694.1	gastrula zinc finger protein XlCGF57.1-like	0	94.26
JPS_TRINITY_DN67680_c0_g1	1770	2.58583	Fibrinogen Related Proteins	2.09189e-56	41.86	XP_018576681.1	zinc finger protein 91-like	0	92.18
JPS_TRINITY_DN1747_c0_g1	1932	1.23402	Fibrinogen Related Proteins	1.93622e-45	44.66	XP_018567987.1	zinc finger protein 883-like	0	94.86
JPS_TRINITY_DN107898_c0_g1	1719	1.81738	Fibrinogen Related Proteins	8.73643e-40	44.5	XP_018570213.1	zinc finger protein 2	0	98.43
JPS_TRINITY_DN5022_c0_g1	4578	0.830914	Fibrinogen Related Proteins	6.71392e-38	41.99	XP_018562791.1	zinc finger protein 236-like	0	94.04
JPS_TRINITY_DN2861_c0_g3	2310	1.01166	Fibrinogen Related Proteins	4.28788e-36	51.18	XP_018569397.1	zinc finger protein 235-like	0	93.52
JPS_TRINITY_DN33026_c1_g1	1779	-0.514225	Fibrinogen Related Proteins	7.0934e-35	40.44	XP_018575198.1	zinc finger protein GLI4	0	94.52
JPS_TRINITY_DN12259_c0_g1	1851	2.01454	Fibrinogen Related Proteins	8.85189e-33	36.4	XP_018565949.1	zinc finger protein 585A-like	0	91.63
JPS_TRINITY_DN20486_c0_g1	1887	1.06827	Fibrinogen Related Proteins	5.91878e-25	40.76	XP_018573526.1	zinc finger protein 90-like	7.42973e-153	59.59
JPS_TRINITY_DN10611_c0_g1	2268	1.56607	Fibrinogen Related Proteins	5.99053e-20	39.11	XP_018573526.1	zinc finger protein 90-like	0	63.68
JPS_TRINITY_DN11673_c0_g1	1458	0.737553	Fibrinogen Related Proteins	8.89412e-13	43.15	XP_018572743.1	zinc finger protein 91-like isoform X2	8.91561e-107	57.93
JPS_TRINITY_DN24343_c0_g3	627	-0.637686	Fibrinogen Related Proteins	1.90207e-11	46.63	XP_018576229.1	zinc finger protein 99-like	1.63345e-94	86.54
JPS_TRINITY_DN20629_c0_g1	534	1.11566	Fibrinogen Related Proteins	7.22414e-11	45.18	XP_018578103.1	zinc finger protein 99-like isoform X2	2.25606e-59	73.03
JPS_TRINITY_DN3867_c1_g1	1539	1.7738	Fibrinogen Related Proteins	8.36427e-11	36.19	XP_018573525.1	zinc finger protein 600-like	2.41055e-114	54.97
JPS_TRINITY_DN6428_c0_g1	339	1.17764	Fibrinogen Related Proteins	8.70389e-11	48.21	XP_018574604.2	zinc finger protein 99-like	4.7207e-38	77.68
JPS_TRINITY_DN3580_c0_g1	1776	0.674473	Fibrinogen Related Proteins	1.17225e-10	44.39	XP_018578092.1	zinc finger protein 493-like	1.97088e-154	64.32
JPS_TRINITY_DN25775_c0_g1	960	0.327486	Fibrinogen Related Proteins	1.92841e-09	48.25	XP_018568362.2	zinc finger protein 480-like	5.69206e-94	67.6
JPS_TRINITY_DN9657_c0_g1	480	1.39145	Fibrinogen Related Proteins	6.51188e-08	43.13	XP_023311486.1	zinc finger protein 112-like isoform X2	1.03251e-64	83.02
JPS_TRINITY_DN7025_c1_g1	822	-0.321928	Fibrinogen Related Proteins	1.84715e-07	41.75	XP_018576229.1	zinc finger protein 99-like	8.69928e-92	70.74
JPS_TRINITY_DN4001_c0_g2	1332	1.54308	Fibrinogen Related Proteins	4.62059e-07	43.36	XP_018573527.1	zinc finger protein 90-like	7.41888e-127	64.64
JPS_TRINITY_DN15504_c0_g1	393	1.2298	Fibrinogen Related Proteins	5.02837e-07	45.3	XP_018574604.2	zinc finger protein 99-like	4.19918e-42	69.53
JPS_TRINITY_DN55470_c0_g1	543	-2.84946	Fibrinogen Related Proteins	6.8758e-07	46.34	XP_023312180.1	zinc finger protein weckle-like	6.37262e-42	90.12
JPS_TRINITY_DN14068_c0_g1	1521	0.731539	Fibrinogen Related Proteins	7.35479e-06	41.7	XP_018573317.1	GDNF-inducible zinc finger protein 1-like	0	78.66
JPS_TRINITY_DN5951_c1_g4	417	1.97913	Fibrinogen Related Proteins	9.17482e-06	47.5	XP_018578472.1	zinc finger protein 90-like isoform X2	9.50815e-57	79.71
JPS_TRINITY_DN10846_c0_g1	1980	1.63079	Fibrinogen Related Proteins	3.079e-67	40.86	XP_018572870.1	zinc finger protein 708-like	0	92.55
JPS_TRINITY_DN18977_c0_g1	1434	0.687596	Fibrinogen Related Proteins	3.34854e-63	53.55	XP_023311685.1	zinc finger protein 585A-like	0	97.08
JPS_TRINITY_DN14589_c0_g1	1380	0.886581	Fibrinogen Related Proteins	4.41979e-57	45.75	XP_018574591.1	zinc finger protein OZF-like	0	94.42
JPS_TRINITY_DN7511_c0_g1	1476	1.83582	Fibrinogen Related Proteins	5.17444e-57	48.84	XP_018564714.1	zinc finger protein 501-like	0	94.91
JPS_TRINITY_DN7177_c0_g1	2403	1.2681	Fibrinogen Related Proteins	1.76031e-55	52.43	XP_018566758.1	zinc finger protein 182	0	98.01
JPS_TRINITY_DN51430_c0_g1	1467	0.959597	Fibrinogen Related Proteins	7.06263e-55	51.6	XP_018579012.1	zinc finger protein OZF-like isoform X1	0	96.93
JPS_TRINITY_DN5863_c2_g1	1596	-0.284488	Fibrinogen Related Proteins	2.61868e-54	47.33	XP_018579008.1	zinc finger protein OZF-like	0	96.99
JPS_TRINITY_DN14692_c0_g1	1629	0.848277	Fibrinogen Related Proteins	9.77652e-53	50.49	XP_018574234.1	zinc finger protein OZF-like	0	93.92
JPS_TRINITY_DN3873_c1_g2	1347	1.20986	Fibrinogen Related Proteins	3.34068e-52	50.67	XP_018564901.1	zinc finger protein OZF-like isoform X1	0	86.53
JPS_TRINITY_DN12606_c0_g1	1638	1.4208	Fibrinogen Related Proteins	3.00568e-51	46.86	XP_018580097.1	zinc finger protein OZF-like	0	97.97
JPS_TRINITY_DN953_c0_g1	1446	2.00668	Fibrinogen Related Proteins	2.7275e-47	46.83	XP_018578498.1	zinc finger protein 501-like	0	91.93
JPS_TRINITY_DN42949_c0_g1	1527	-0.279496	Fibrinogen Related Proteins	4.269e-47	50	XP_018574539.1	zinc finger protein 615-like	0	98.03
JPS_TRINITY_DN10617_c0_g1	951	1.15679	Fibrinogen Related Proteins	9.81939e-47	47.9	XP_023310867.1	zinc finger protein 721	1.7624e-140	77.51
JPS_TRINITY_DN15089_c0_g1	1575	1.7386	Fibrinogen Related Proteins	4.99609e-46	43.81	XP_018571597.1	gastrula zinc finger protein XlCGF57.1-like	0	86.5
JPS_TRINITY_DN40589_c0_g1	1470	1.73158	Fibrinogen Related Proteins	5.97658e-46	47.38	XP_018578142.1	zinc finger protein OZF-like isoform X2	0	90.57
JPS_TRINITY_DN14009_c0_g1	1719	1.38078	Fibrinogen Related Proteins	7.72075e-42	47.57	XP_018579009.1	zinc finger protein 436-like	0	94.41
JPS_TRINITY_DN8916_c0_g4	795	2.10927	Fibrinogen Related Proteins	1.17902e-41	47.91	XP_019867985.1	zinc finger protein 714-like isoform X1	1.83756e-144	86.26
JPS_TRINITY_DN5864_c0_g1	1470	-0.217672	Fibrinogen Related Proteins	3.9342e-41	46.27	XP_018568381.1	zinc finger protein 26-like	0	89.84
JPS_TRINITY_DN8916_c0_g5	2130	1.41067	Fibrinogen Related Proteins	1.11398e-40	42.39	XP_018568013.1	uncharacterized protein LOC108908457	0	76.93
JPS_TRINITY_DN19604_c0_g1	909	0.454397	Fibrinogen Related Proteins	7.38856e-40	44.69	KAF7286010.1	hypothetical protein	6.85377e-81	62.63
JPS_TRINITY_DN5355_c0_g1	1557	2.44298	Fibrinogen Related Proteins	4.74491e-39	47.27	XP_018576449.1	zinc finger protein 880-like isoform X1	0	92.47
JPS_TRINITY_DN14078_c0_g1	1416	0.818295	Fibrinogen Related Proteins	6.499e-34	49.6	XP_018565950.1	zinc finger protein 90-like	0	94.95
JPS_TRINITY_DN16511_c0_g2	1557	1.97943	Fibrinogen Related Proteins	1.22231e-28	43.83	XP_018565330.1	zinc finger protein 235-like	0	70
JPS_TRINITY_DN6332_c0_g1	927	1.25139	Fibrinogen Related Proteins	1.20323e-27	46.52	XP_023312989.1	uncharacterized protein LOC108906270	2.20757e-172	91.23
JPS_TRINITY_DN398_c0_g2	1602	1.0646	Fibrinogen Related Proteins	1.39642e-26	42.57	XP_018563109.1	zinc finger protein draculin-like	0	85.2
JPS_TRINITY_DN5046_c0_g1	1377	-0.946655	Fibrinogen Related Proteins	2.21793e-25	46.46	JAB62625.1	Zinc finger protein	0	95.83
JPS_TRINITY_DN4140_c1_g1	1203	-0.3635	Fibrinogen Related Proteins	2.30025e-25	42.38	XP_023310864.1	zinc finger protein 62 homolog	0	95.89
JPS_TRINITY_DN75_c1_g2	477	0.98696	Fibrinogen Related Proteins	9.83666e-25	50.66	XP_018571596.1	zinc finger protein 883-like	6.15553e-108	100
JPS_TRINITY_DN398_c0_g1	1155	-4.16321	Fibrinogen Related Proteins	2.55512e-24	40	XP_018563108.1	zinc finger protein 665 isoform X2	0	84.82
JPS_TRINITY_DN12501_c0_g1	468	0.899866	Fibrinogen Related Proteins	2.11522e-21	49.21	XP_018564616.1	zinc finger protein 2-like	1.76674e-74	95.04
JPS_TRINITY_DN3377_c0_g2	1350	2.09754	Fibrinogen Related Proteins	4.60832e-21	43.77	XP_023311762.1	zinc finger protein 11-like	0	77.23
JPS_TRINITY_DN7265_c0_g1	1911	-1.93386	Fibrinogen Related Proteins	2.87337e-19	41.12	XP_018567530.1	zinc finger and BTB domain-containing protein 49	0	99.22
JPS_TRINITY_DN14634_c0_g3	1281	3.3941	Fibrinogen Related Proteins	5.37321e-19	39.61	XP_018567897.1	zinc finger protein 431-like	5.01715e-113	67.68
JPS_TRINITY_DN6197_c0_g1	2394	1.82302	Fibrinogen Related Proteins	4.62733e-18	44.44	XP_018572416.2	zinc finger protein 90-like	0	63.72
JPS_TRINITY_DN14493_c0_g1	3642	-0.818111	Fibrinogen Related Proteins	1.36591e-17	39.02	XP_018568001.1	zinc finger protein 99-like isoform X1	0	94.91
JPS_TRINITY_DN2441_c0_g3	2115	2.5321	Fibrinogen Related Proteins	2.7413e-16	41.67	XP_023311881.1	zinc finger protein 271-like	0	65.77
JPS_TRINITY_DN36935_c0_g1	1953	1.44944	Fibrinogen Related Proteins	3.49945e-16	41.11	XP_018566994.1	zinc finger protein 99-like	0	94.62
JPS_TRINITY_DN9350_c0_g1	1014	0.959958	Fibrinogen Related Proteins	5.83889e-16	44.4	XP_028136187.1	zinc finger Y-chromosomal protein-like	2.83232e-45	49.28
JPS_TRINITY_DN4846_c2_g1	1491	1.69053	Fibrinogen Related Proteins	8.99587e-16	39.11	XP_018573520.1	zinc finger protein 761-like	3.55606e-132	61.92
JPS_TRINITY_DN58764_c1_g1	1125	1.55385	Fibrinogen Related Proteins	1.54169e-15	42.65	XP_018568400.1	zinc finger protein 845-like	5.5665e-101	68.69
JPS_TRINITY_DN10693_c0_g2	1758	1.44659	Fibrinogen Related Proteins	7.26246e-15	37.72	XP_023310761.1	zinc finger protein 184-like	5.1147e-166	62.82
JPS_TRINITY_DN5250_c0_g2	1599	3.97699	Fibrinogen Related Proteins	9.1057e-15	41.88	XP_018572427.1	zinc finger protein 43-like	1.98152e-152	65.03
JPS_TRINITY_DN11171_c0_g1	702	1.72107	Fibrinogen Related Proteins	1.30806e-14	43.41	XP_018574604.2	zinc finger protein 99-like	1.17624e-86	71.19
JPS_TRINITY_DN4453_c2_g1	1737	0.567504	Fibrinogen Related Proteins	1.84319e-14	40.13	XP_018573526.1	zinc finger protein 90-like	1.48594e-164	60.82
JPS_TRINITY_DN28828_c1_g1	645	1.67627	Fibrinogen Related Proteins	5.51649e-14	43.46	XP_018574604.2	zinc finger protein 99-like	3.50271e-82	75.81
JPS_TRINITY_DN6356_c0_g1	4356	-1.42981	Fibrinogen Related Proteins	9.87775e-14	63.22	XP_018579370.1	uncharacterized protein LOC108917312 isoform X1	0	98.21
JPS_TRINITY_DN8682_c0_g1	615	1.59943	Fibrinogen Related Proteins	1.18772e-13	41.4	XP_018568400.1	zinc finger protein 845-like	2.80727e-73	72.77
JPS_TRINITY_DN3554_c0_g1	552	2.40143	Fibrinogen Related Proteins	1.49547e-13	44.89	XP_018567897.1	zinc finger protein 431-like	2.57623e-57	71.12
JPS_TRINITY_DN50388_c0_g2	1842	0.400203	Fibrinogen Related Proteins	4.12674e-13	37.91	XP_023309786.1	zinc finger Y-chromosomal protein 2-like	0	97.16
JPS_TRINITY_DN9052_c0_g1	1467	2.03636	Fibrinogen Related Proteins	8.36722e-13	38.94	XP_018568400.1	zinc finger protein 845-like	5.12576e-127	62.53
JPS_TRINITY_DN6269_c0_g1	2283	0.264099	Fibrinogen Related Proteins	1.01649e-12	39.43	XP_018574574.1	zinc finger protein 729-like	0	70.05
JPS_TRINITY_DN9620_c0_g2	1632	1.8424	Fibrinogen Related Proteins	2.26165e-12	41.7	XP_018568362.2	zinc finger protein 480-like	1.73312e-141	62.99
JPS_TRINITY_DN8006_c0_g5	1410	-0.455891	Fibrinogen Related Proteins	5.1454e-12	44.75	XP_018576230.1	zinc finger protein 729-like	1.7439e-141	63.65
JPS_TRINITY_DN6505_c0_g4	1464	2.18004	Fibrinogen Related Proteins	5.17199e-12	40.78	XP_018576227.1	zinc finger protein 43-like	5.53514e-154	68.21
JPS_TRINITY_DN4586_c0_g1	1353	0.862346	Fibrinogen Related Proteins	8.70992e-12	46.55	XP_018573526.1	zinc finger protein 90-like	1.76206e-103	63.51
JPS_TRINITY_DN6984_c0_g1	1689	0.801267	Fibrinogen Related Proteins	1.21383e-11	40.87	XP_018572428.2	zinc finger protein 112-like isoform X1	4.12176e-171	67.78
JPS_TRINITY_DN4966_c4_g1	1740	1.74599	Fibrinogen Related Proteins	2.08208e-11	42.62	XP_018573532.1	zinc finger protein 37-like	2.45666e-142	56.9
JPS_TRINITY_DN16214_c0_g1	612	0.681458	Fibrinogen Related Proteins	2.30973e-11	40.83	XP_018568400.1	zinc finger protein 845-like	1.61339e-77	77.23
JPS_TRINITY_DN8594_c0_g1	1302	1.40744	Fibrinogen Related Proteins	7.58544e-11	42.73	XP_018575552.1	zinc finger protein 431-like	8.22686e-139	65.74
JPS_TRINITY_DN1521_c0_g1	861	1.87617	Fibrinogen Related Proteins	1.07391e-10	39.08	XP_023310761.1	zinc finger protein 184-like	1.04734e-97	72.51
JPS_TRINITY_DN3378_c0_g1	522	1.20499	Fibrinogen Related Proteins	2.1645e-10	43.02	XP_018578472.1	zinc finger protein 90-like isoform X2	6.9108e-61	70.52
JPS_TRINITY_DN34602_c0_g2	417	0.961051	Fibrinogen Related Proteins	2.44664e-10	47.5	XP_018568400.1	zinc finger protein 845-like	2.54588e-45	72.99
JPS_TRINITY_DN35967_c1_g1	669	1.53798	Fibrinogen Related Proteins	3.58716e-10	44.38	XP_018574604.2	zinc finger protein 99-like	4.12269e-81	73.16
JPS_TRINITY_DN2805_c1_g1	381	1.38171	Fibrinogen Related Proteins	4.94506e-10	49.17	XP_018568400.1	zinc finger protein 845-like	2.48241e-33	69.6
JPS_TRINITY_DN32175_c0_g1	1365	1.42064	Fibrinogen Related Proteins	5.46684e-10	43.69	XP_018574139.1	zinc finger autosomal protein-like	1.9827e-138	65.57
JPS_TRINITY_DN8330_c0_g1	924	0.735356	Fibrinogen Related Proteins	6.15409e-10	39.18	XP_018574604.2	zinc finger protein 99-like	5.00444e-81	69.52
JPS_TRINITY_DN8309_c0_g1	627	1.54894	Fibrinogen Related Proteins	6.84026e-10	44.44	XP_023311881.1	zinc finger protein 271-like	2.98781e-80	77.4
JPS_TRINITY_DN2828_c0_g2	1053	1.33215	Fibrinogen Related Proteins	8.88783e-10	41.35	XP_018578472.1	zinc finger protein 90-like isoform X2	1.29227e-97	64.71
JPS_TRINITY_DN2305_c3_g1	810	2.0545	Fibrinogen Related Proteins	1.15569e-09	43.89	XP_018568400.1	zinc finger protein 845-like	1.04195e-76	67.97
JPS_TRINITY_DN28828_c0_g1	2175	1.65492	Fibrinogen Related Proteins	2.54835e-09	40.33	XP_018575556.1	zinc finger protein 626-like	0	64.59
JPS_TRINITY_DN6984_c1_g1	1626	2.18662	Fibrinogen Related Proteins	2.84208e-09	45.05	XP_018572428.2	zinc finger protein 112-like isoform X1	0	71.45
JPS_TRINITY_DN4109_c2_g2	1809	2.05722	Fibrinogen Related Proteins	3.24877e-09	44.6	XP_018574139.1	zinc finger autosomal protein-like	0	70
JPS_TRINITY_DN8302_c0_g1	540	2.7314	Fibrinogen Related Proteins	5.05962e-09	41.18	XP_018568400.1	zinc finger protein 845-like	3.63383e-60	74.3
JPS_TRINITY_DN13095_c0_g2	510	2.9903	Fibrinogen Related Proteins	8.13824e-09	47.1	XP_018577577.1	zinc finger protein 233-like	1.50119e-64	78.66
JPS_TRINITY_DN7188_c0_g3	681	1.02051	Fibrinogen Related Proteins	8.68434e-09	39.75	XP_018568378.1	zinc finger protein 366-like	1.05311e-79	75.11
JPS_TRINITY_DN9657_c1_g1	1224	2.24909	Fibrinogen Related Proteins	1.29408e-08	41	XP_023312548.1	zinc finger protein 2-like isoform X1	7.29599e-121	67.63
JPS_TRINITY_DN11452_c0_g1	1254	1.89088	Fibrinogen Related Proteins	1.34872e-08	45.21	XP_018576227.1	zinc finger protein 43-like	1.38979e-115	60.14
JPS_TRINITY_DN10153_c0_g1	1305	0.494687	Fibrinogen Related Proteins	1.62203e-08	36.45	XP_018576229.1	zinc finger protein 99-like	5.56067e-69	61.72
JPS_TRINITY_DN3339_c1_g2	2577	1.35611	Fibrinogen Related Proteins	2.68378e-08	38.01	XP_023311762.1	zinc finger protein 11-like	0	59.19
JPS_TRINITY_DN34602_c0_g1	414	1.10951	Fibrinogen Related Proteins	3.32867e-08	46.09	XP_018568400.1	zinc finger protein 845-like	8.94214e-47	74.07
JPS_TRINITY_DN4092_c0_g1	1143	1.00612	Fibrinogen Related Proteins	3.65321e-08	42.92	XP_018561801.1	zinc finger protein 90-like	1.42399e-124	68.98
JPS_TRINITY_DN4399_c0_g1	624	1.46481	Fibrinogen Related Proteins	4.08424e-08	39.32	XP_023312813.1	zinc finger protein 90-like	2.06414e-71	68.58
JPS_TRINITY_DN6498_c2_g1	705	2.69651	Fibrinogen Related Proteins	9.16895e-08	43.79	XP_018574604.2	zinc finger protein 99-like	9.80353e-75	72.46
JPS_TRINITY_DN4109_c2_g5	1536	1.30324	Fibrinogen Related Proteins	1.3914e-07	39.9	XP_018578238.1	zinc finger protein 761-like isoform X1	7.41025e-161	66.85
JPS_TRINITY_DN22900_c0_g1	2052	1.90235	Fibrinogen Related Proteins	1.41943e-07	41.24	XP_018573521.1	zinc finger protein 90-like	3.90995e-56	68.78
JPS_TRINITY_DN22900_c1_g1	1041	0.12906	Fibrinogen Related Proteins	1.60997e-07	49.32	XP_018573525.1	zinc finger protein 600-like	6.28019e-120	74.93
JPS_TRINITY_DN18922_c0_g2	918	0.960835	Fibrinogen Related Proteins	1.75486e-07	39.62	XP_018567897.1	zinc finger protein 431-like	6.48167e-78	66.45
JPS_TRINITY_DN4846_c1_g1	1221	1.39705	Fibrinogen Related Proteins	2.05745e-07	42.21	XP_018568400.1	zinc finger protein 845-like	1.31124e-118	59.96
JPS_TRINITY_DN5168_c1_g1	951	1.29754	Fibrinogen Related Proteins	2.11604e-07	41.21	XP_018568400.1	zinc finger protein 845-like	8.00587e-70	59.31
JPS_TRINITY_DN5562_c0_g2	852	1.23459	Fibrinogen Related Proteins	2.66952e-07	44.55	XP_018568389.1	zinc finger protein 142-like	4.06608e-99	75.35
JPS_TRINITY_DN10321_c1_g3	366	1.19272	Fibrinogen Related Proteins	3.56741e-07	43.27	XP_018577576.1	zinc finger protein 431-like	4.66e-49	80.99
JPS_TRINITY_DN4109_c0_g1	780	1.81714	Fibrinogen Related Proteins	3.60265e-07	38.83	XP_018564489.1	RE1-silencing transcription factor-like	1.39385e-59	65.95
JPS_TRINITY_DN9439_c0_g2	615	1.87602	Fibrinogen Related Proteins	6.04945e-07	39.46	XP_018567897.1	zinc finger protein 431-like	7.29741e-66	71.29
JPS_TRINITY_DN5645_c0_g1	1212	1.64139	Fibrinogen Related Proteins	6.41903e-07	36.91	XP_018576227.1	zinc finger protein 43-like	9.9904e-133	66.36
JPS_TRINITY_DN14537_c0_g1	492	1.18626	Fibrinogen Related Proteins	9.81321e-07	43.14	XP_018574604.2	zinc finger protein 99-like	5.06379e-63	76.83
JPS_TRINITY_DN11633_c0_g5	462	1.57873	Fibrinogen Related Proteins	1.167e-06	46.27	XP_018568400.1	zinc finger protein 845-like	6.12982e-53	74.03
JPS_TRINITY_DN9933_c2_g1	867	0.888823	Fibrinogen Related Proteins	1.41546e-06	39.15	XP_018568400.1	zinc finger protein 845-like	4.96665e-94	74.31
JPS_TRINITY_DN12007_c0_g2	561	1.45403	Fibrinogen Related Proteins	1.77461e-06	38.46	XP_018568362.2	zinc finger protein 480-like	4.33511e-66	74.6
JPS_TRINITY_DN24592_c0_g1	411	0.72473	Fibrinogen Related Proteins	2.11781e-06	49.06	XP_018577575.1	zinc finger protein 90-like	4.91607e-39	70.83
JPS_TRINITY_DN7038_c0_g1	825	3.09783	Fibrinogen Related Proteins	2.46384e-06	37.33	XP_018568400.1	zinc finger protein 845-like	9.52224e-87	73.11
JPS_TRINITY_DN6287_c0_g1	378	1.76991	Fibrinogen Related Proteins	2.52766e-06	47.46	XP_018575546.1	zinc finger protein 62 homolog	8.83344e-52	80.8
JPS_TRINITY_DN12798_c1_g1	1092	1.38633	Fibrinogen Related Proteins	4.06814e-06	40	XP_018567063.1	zinc finger autosomal protein-like	4.60122e-106	62.63
JPS_TRINITY_DN11452_c0_g3	576	2.28316	Fibrinogen Related Proteins	4.16959e-06	44.35	XP_018577811.1	zinc finger protein 90-like	1.44596e-54	71.26
JPS_TRINITY_DN3867_c0_g1	450	2.40781	Fibrinogen Related Proteins	4.27099e-06	43.57	XP_018561246.1	zinc finger protein 33A-like isoform X1	7.12423e-47	72.73
JPS_TRINITY_DN8673_c1_g1	471	1.05907	Fibrinogen Related Proteins	4.77317e-06	45.07	XP_018574604.2	zinc finger protein 99-like	2.85611e-67	82.05
JPS_TRINITY_DN6505_c0_g1	378	1.82258	Fibrinogen Related Proteins	6.01763e-06	43.86	XP_023312813.1	zinc finger protein 90-like	2.55196e-53	80.16
JPS_TRINITY_DN368_c0_g1	5295	-0.195291	Fibrinogen Related Proteins	7.50526e-06	33.94	XP_018567924.1	zinc finger protein Xfin isoform X2	0	94.13
JPS_TRINITY_DN22641_c0_g1	639	-0.813376	Fibrinogen Related Proteins	9.19491e-06	50.63	XP_023019667.1	longitudinals lacking protein, isoforms N/O/W/X/Y isoform X1	3.21441e-63	74.1
JPS_TRINITY_DN3530_c0_g1	342	-0.229097	Fibrinogen Related Proteins	2.2584e-25	59.79	XP_018576399.1	tyrosine-protein kinase Fer isoform X2	1.06203e-76	98.23
JPS_TRINITY_DN12713_c0_g1	2046	-0.352352	Fibrinogen Related Proteins	4.067e-63	57.29	XP_023311404.1	tyrosine kinase receptor Cad96Ca	0	97.24
JPS_TRINITY_DN672_c0_g1	4347	-0.0932714	Fibrinogen Related Proteins	7.00826e-52	52.85	XP_018566463.1	epidermal growth factor receptor isoform X1	0	97.17
JPS_TRINITY_DN141914_c0_g1	1647	0.325668	Fibrinogen Related Proteins	7.74802e-44	55.35	XP_018578936.1	tyrosine-protein kinase Drl	0	99.27
JPS_TRINITY_DN15756_c0_g1	3303	-2.3156	Fibrinogen Related Proteins	1.82128e-36	51.2	XP_018563459.1	tyrosine-protein kinase-like otk	0	97.29
JPS_TRINITY_DN26729_c0_g1	1284	0.422652	Fibrinogen Related Proteins	4.34451e-55	45.25	XP_018572262.1	zinc finger protein 501	0	85.91
JPS_TRINITY_DN2327_c1_g1	1428	1.81542	Fibrinogen Related Proteins	9.48703e-49	44.09	XP_018564723.1	zinc finger protein 664-like	0	89.55
JPS_TRINITY_DN76119_c0_g1	1290	2.04363	Fibrinogen Related Proteins	1.08821e-48	44.39	XP_018576681.1	zinc finger protein 91-like	0	95.58
JPS_TRINITY_DN9701_c0_g1	1494	-0.481791	Fibrinogen Related Proteins	1.40087e-45	49.87	XP_018575107.1	zinc finger protein 2 homolog isoform X2	0	92.64
JPS_TRINITY_DN8401_c0_g1	1245	1.69987	Fibrinogen Related Proteins	1.55338e-41	43.65	XP_018574146.1	zinc finger protein 664-like isoform X1	0	84.08
JPS_TRINITY_DN4082_c0_g1	1698	1.4127	Fibrinogen Related Proteins	1.24809e-40	60	XP_018572175.1	zinc finger protein 678	0	97.18
JPS_TRINITY_DN10113_c0_g1	1644	1.0133	Fibrinogen Related Proteins	4.62145e-35	48.48	XP_018576695.1	zinc finger protein 62-like	0	94.07
JPS_TRINITY_DN5926_c0_g1	957	-0.033302	Fibrinogen Related Proteins	2.27476e-34	56.97	XP_023310867.1	zinc finger protein 721	4.01179e-180	93.13
JPS_TRINITY_DN13805_c0_g1	969	-1.64876	Fibrinogen Related Proteins	7.19089e-29	54.23	XP_018570185.1	protein odd-skipped	0	95.99
JPS_TRINITY_DN3907_c0_g1	1743	-2.76167	Fibrinogen Related Proteins	6.59145e-28	53.19	XP_018570677.1	zinc finger protein 8	0	99.66
JPS_TRINITY_DN2601_c0_g1	2811	0.698497	Fibrinogen Related Proteins	2.25229e-26	52.72	JAB68011.1	Metal regulatory transcription factor	0	90.12
JPS_TRINITY_DN11038_c0_g1	1320	1.79342	Fibrinogen Related Proteins	5.18097e-25	50.31	XP_018565872.1	zinc finger protein 675-like	0	86.91
JPS_TRINITY_DN11996_c0_g2	1053	0.914609	Fibrinogen Related Proteins	2.621e-24	43.5	XP_018579470.1	zinc finger protein 62 homolog	0	87.91
JPS_TRINITY_DN2209_c0_g1	1461	1.78692	Fibrinogen Related Proteins	1.13667e-23	41.67	XP_018570004.1	zinc finger protein 77-like	8.02156e-155	94.67
JPS_TRINITY_DN9154_c0_g1	1242	2.04711	Fibrinogen Related Proteins	3.65362e-23	43.56	XP_018575151.1	zinc finger protein 184-like isoform X1	0	82.12
JPS_TRINITY_DN7253_c0_g1	1806	2.37429	Fibrinogen Related Proteins	2.39996e-22	44.49	XP_018565299.1	zinc finger protein 808-like	0	76.19
JPS_TRINITY_DN10441_c0_g1	3186	-0.0336875	Fibrinogen Related Proteins	2.79693e-22	40.51	XP_018572563.1	PR domain zinc finger protein 10	0	96.72
JPS_TRINITY_DN11120_c0_g1	1206	-0.732977	Fibrinogen Related Proteins	1.41595e-21	50.34	XP_018574520.1	zinc finger protein SNAI2-like	0	98.5
JPS_TRINITY_DN67697_c0_g1	2253	0.53952	Fibrinogen Related Proteins	1.74318e-21	44.19	XP_023312487.1	zinc finger protein 26-like	0	94.45
JPS_TRINITY_DN54390_c0_g1	1734	1.12645	Fibrinogen Related Proteins	6.76596e-18	52.03	XP_018562188.1	zinc finger protein 90 homolog	0	96.04
JPS_TRINITY_DN26079_c0_g1	1137	2.12418	Fibrinogen Related Proteins	1.47794e-16	58.33	XP_018569669.1	Krueppel-like factor 6 isoform X2	0	96.25
JPS_TRINITY_DN15908_c0_g1	1041	-0.869224	Fibrinogen Related Proteins	1.37075e-15	65.79	JAB64494.1	Krueppel-like factor 10	0	95.09
JPS_TRINITY_DN3862_c0_g1	972	-0.395567	Fibrinogen Related Proteins	4.2463e-15	58.95	XP_018571509.1	Krueppel-like factor luna	0	98.45
JPS_TRINITY_DN3969_c0_g2	1227	-1.80543	Fibrinogen Related Proteins	2.90032e-14	58.14	XP_030745062.1	dendritic arbor reduction protein 1 isoform X1	1.85301e-127	74.55
JPS_TRINITY_DN3898_c0_g1	4218	-0.802545	Fibrinogen Related Proteins	1.09062e-13	50	XP_023311021.1	homeotic protein spalt-major-like	0	93.96
JPS_TRINITY_DN35763_c0_g1	1506	-1.73972	Fibrinogen Related Proteins	1.01668e-11	41.24	XP_018573457.1	zinc finger and BTB domain-containing protein 14	0	96.02
JPS_TRINITY_DN11017_c1_g1	1041	2.48862	Fibrinogen Related Proteins	3.22267e-08	41.03	XP_018568400.1	zinc finger protein 845-like	2.15145e-75	60.48
JPS_TRINITY_DN4847_c0_g1	1200	0.722379	Fibrinogen Related Proteins	1.10279e-06	46.79	XP_018574607.1	zinc finger protein 616-like	1.73343e-134	66.99
JPS_TRINITY_DN6929_c0_g1	453	1.02837	Fibrinogen Related Proteins	1.45158e-06	43.26	XP_018577576.1	zinc finger protein 431-like	6.6057e-66	81.46
JPS_TRINITY_DN16613_c0_g1	1650	0.686525	Fibrinogen Related Proteins	4.79773e-69	54.35	XP_023312110.1	zinc finger protein OZF isoform X1	0	98.69
JPS_TRINITY_DN5376_c0_g1	1233	0.803751	Fibrinogen Related Proteins	3.20377e-61	50.16	XP_018568670.1	zinc finger protein 2 homolog isoform X2	0	91.65
JPS_TRINITY_DN10320_c0_g1	942	-0.9225	Fibrinogen Related Proteins	6.78181e-58	52.92	XP_018568719.1	zinc finger protein 883 isoform X1	0	100
JPS_TRINITY_DN1923_c0_g3	951	0.785045	Fibrinogen Related Proteins	1.35339e-57	53.53	XP_018576858.1	zinc finger protein 883-like	0	99.05
JPS_TRINITY_DN65060_c0_g1	2085	2.1573	Fibrinogen Related Proteins	2.59785e-55	50.48	XP_018569634.1	zinc finger protein 583	0	97.7
JPS_TRINITY_DN3977_c0_g1	2256	1.8511	Fibrinogen Related Proteins	4.81316e-52	48.97	XP_018564613.1	zinc finger protein 431-like	0	86.72
JPS_TRINITY_DN8835_c0_g1	2136	0.184353	Fibrinogen Related Proteins	5.48212e-50	45.3	XP_018576196.1	zinc finger protein 2 homolog	0	95.1
JPS_TRINITY_DN19239_c0_g1	1476	1.32328	Fibrinogen Related Proteins	6.80436e-50	48.46	XP_018577034.1	zinc finger protein OZF	0	92.91
JPS_TRINITY_DN55283_c0_g3	1611	0.540456	Fibrinogen Related Proteins	3.33429e-43	47.94	XP_023019904.1	gastrula zinc finger protein XlCGF26.1-like	0	82.08
JPS_TRINITY_DN21305_c0_g1	1518	1.76458	Fibrinogen Related Proteins	6.93929e-43	48.04	XP_018567898.1	zinc finger protein 761-like	0	84.31
JPS_TRINITY_DN25263_c0_g1	1176	1.32693	Fibrinogen Related Proteins	1.51717e-42	48.04	KAF7286010.1	hypothetical protein	1.04907e-65	56.49
JPS_TRINITY_DN2748_c0_g1	1620	0.47568	Fibrinogen Related Proteins	3.87536e-42	46.95	XP_028149955.1	gastrula zinc finger protein XlCGF26.1-like isoform X2	0	78.65
JPS_TRINITY_DN25983_c0_g1	912	1.0986	Fibrinogen Related Proteins	7.77275e-41	47.18	KAF7286010.1	hypothetical protein	1.36611e-94	66.9
JPS_TRINITY_DN16440_c0_g1	1536	0.79397	Fibrinogen Related Proteins	4.77026e-38	44.27	XP_023310864.1	zinc finger protein 62 homolog	0	93.71
JPS_TRINITY_DN34396_c0_g1	957	-0.902829	Fibrinogen Related Proteins	6.98657e-38	48.43	XP_023310865.1	zinc finger protein 585A	0	98.66
JPS_TRINITY_DN37054_c0_g1	1233	-0.723633	Fibrinogen Related Proteins	1.91411e-36	51	XP_023310865.1	zinc finger protein 585A	0	99.39
JPS_TRINITY_DN41926_c0_g1	810	0.526014	Fibrinogen Related Proteins	1.46025e-34	48.77	KAF7286010.1	hypothetical protein	1.54458e-94	70.3
JPS_TRINITY_DN83264_c0_g1	1116	0.500968	Fibrinogen Related Proteins	3.0742e-33	47.86	XP_018575728.1	zinc finger protein 208-like	9.68401e-162	96.39
JPS_TRINITY_DN9547_c0_g1	1086	-0.189011	Fibrinogen Related Proteins	1.34919e-32	43.33	XP_018575745.2	zinc finger protein 239-like	0	93.87
JPS_TRINITY_DN19414_c0_g1	1542	1.57343	Fibrinogen Related Proteins	2.66313e-32	51.81	XP_018563493.1	zinc finger protein 737-like	0	97.19
JPS_TRINITY_DN37054_c0_g4	924	-1.92228	Fibrinogen Related Proteins	3.4715e-32	47.66	XP_018575733.1	zinc finger protein 235-like	0	98.22
JPS_TRINITY_DN40952_c0_g1	1755	1.87094	Fibrinogen Related Proteins	9.21727e-31	46.29	XP_018565948.1	gastrula zinc finger protein XlCGF26.1-like	0	83.87
JPS_TRINITY_DN63587_c0_g1	897	-0.184987	Fibrinogen Related Proteins	1.43887e-30	47.6	XP_015834158.1	zinc finger protein 234 isoform X41	2.70997e-98	69.36
JPS_TRINITY_DN5014_c0_g1	708	0.172658	Fibrinogen Related Proteins	3.72151e-29	51.08	XP_018577668.1	gastrula zinc finger protein XlCGF71.1-like	6.52803e-163	97.45
JPS_TRINITY_DN4738_c0_g1	1608	-0.391364	Fibrinogen Related Proteins	2.91995e-28	49.78	XP_018568529.1	zinc finger and BTB domain-containing protein 24-like	0	98.5
JPS_TRINITY_DN3788_c0_g1	1410	1.56728	Fibrinogen Related Proteins	2.41609e-27	52.05	XP_018560791.1	zinc finger and SCAN domain-containing protein 2-like isoform X1	0	97.01
JPS_TRINITY_DN8439_c0_g1	1500	2.04614	Fibrinogen Related Proteins	7.91403e-25	42.47	XP_018568717.1	zinc finger protein 567-like	0	89.98
JPS_TRINITY_DN11996_c0_g1	1104	2.1919	Fibrinogen Related Proteins	9.42407e-25	48.54	XP_018579470.1	zinc finger protein 62 homolog	0	88.44
JPS_TRINITY_DN19406_c0_g3	1683	2.2241	Fibrinogen Related Proteins	1.5686e-23	43.3	XP_018561356.1	PR domain zinc finger protein 15-like	0	90.55
JPS_TRINITY_DN3875_c0_g1	2304	2.32722	Fibrinogen Related Proteins	1.01038e-20	39.88	XP_018566376.1	zinc finger protein 184-like isoform X4	0	72.4
JPS_TRINITY_DN33783_c0_g1	2079	2.47937	Fibrinogen Related Proteins	2.59148e-20	41.59	XP_018578238.1	zinc finger protein 761-like isoform X1	0	66.92
JPS_TRINITY_DN2305_c0_g4	1938	1.20998	Fibrinogen Related Proteins	1.51994e-19	41.38	XP_023310761.1	zinc finger protein 184-like	4.16569e-152	63.51
JPS_TRINITY_DN18906_c0_g1	2994	-3.6993	Fibrinogen Related Proteins	1.02504e-18	50	XP_018561439.1	transcription factor 20-like	0	84.88
JPS_TRINITY_DN3062_c0_g1	2211	1.19578	Fibrinogen Related Proteins	1.38355e-17	44.1	XP_018560953.1	uncharacterized protein LOC108903309	0	88.33
JPS_TRINITY_DN7394_c0_g1	1584	1.42171	Fibrinogen Related Proteins	4.47646e-17	41.49	XP_018576066.1	zinc finger protein 470-like	0	93.93
JPS_TRINITY_DN5144_c0_g1	4080	1.75384	Fibrinogen Related Proteins	2.41245e-16	44.98	XP_018567785.1	uncharacterized protein LOC108908278	0	94.72
JPS_TRINITY_DN10044_c0_g1	702	-1.56516	Fibrinogen Related Proteins	2.89821e-16	49.28	XP_023312596.1	zinc finger protein 558-like	5.24222e-101	95.51
JPS_TRINITY_DN10611_c0_g2	2061	1.29314	Fibrinogen Related Proteins	4.05319e-16	41.42	XP_023310761.1	zinc finger protein 184-like	4.04037e-155	59.6
JPS_TRINITY_DN13282_c0_g1	1245	-0.134266	Fibrinogen Related Proteins	4.10677e-16	46.43	XP_030752790.1	zinc finger protein 600-like isoform X13	1.66666e-37	45.5
JPS_TRINITY_DN4558_c0_g1	2331	-0.50639	Fibrinogen Related Proteins	9.02951e-16	58.33	XP_018572914.1	transcriptional regulator ovo-like isoform X2	0	98.46
JPS_TRINITY_DN4453_c3_g1	1344	2.70962	Fibrinogen Related Proteins	1.04684e-14	35.98	XP_018568400.1	zinc finger protein 845-like	2.71764e-91	69.61
JPS_TRINITY_DN5280_c0_g4	2046	2.15093	Fibrinogen Related Proteins	4.01956e-13	35.95	XP_018575871.1	zinc finger protein 99-like	0	78
JPS_TRINITY_DN4214_c0_g5	1377	1.8227	Fibrinogen Related Proteins	7.69117e-13	39.57	XP_018578098.1	zinc finger protein 90-like isoform X2	1.35695e-150	68.45
JPS_TRINITY_DN4109_c2_g4	1923	2.19136	Fibrinogen Related Proteins	1.93007e-12	38.53	XP_018574139.1	zinc finger autosomal protein-like	0	66.77
JPS_TRINITY_DN6681_c0_g1	978	0.655285	Fibrinogen Related Proteins	4.13029e-12	42.07	XP_023310761.1	zinc finger protein 184-like	7.48495e-104	66.76
JPS_TRINITY_DN15482_c0_g2	1494	0.816457	Fibrinogen Related Proteins	5.15532e-12	39.88	XP_023312162.1	zinc finger protein 883-like	5.7894e-126	60.75
JPS_TRINITY_DN5105_c0_g2	1206	1.30194	Fibrinogen Related Proteins	1.03781e-11	42.62	XP_018568400.1	zinc finger protein 845-like	2.49938e-80	68.5
JPS_TRINITY_DN4517_c0_g1	1209	1.87518	Fibrinogen Related Proteins	5.74972e-11	35.68	XP_018568400.1	zinc finger protein 845-like	5.84887e-105	60.73
JPS_TRINITY_DN11975_c0_g2	1311	2.4617	Fibrinogen Related Proteins	2.74129e-10	41.32	XP_018568400.1	zinc finger protein 845-like	6.44626e-95	57.38
JPS_TRINITY_DN4367_c0_g6	447	1.27667	Fibrinogen Related Proteins	1.03544e-09	48.63	XP_018567897.1	zinc finger protein 431-like	2.24431e-38	72.92
JPS_TRINITY_DN6972_c1_g1	543	2.60216	Fibrinogen Related Proteins	1.47462e-09	41.38	XP_018568400.1	zinc finger protein 845-like	2.21163e-57	68.85
JPS_TRINITY_DN3554_c0_g3	573	0.60671	Fibrinogen Related Proteins	2.55261e-09	40	XP_018568400.1	zinc finger protein 845-like	2.07157e-58	68.66
JPS_TRINITY_DN7295_c0_g1	690	1.08272	Fibrinogen Related Proteins	3.03603e-09	44.17	XP_018577811.1	zinc finger protein 90-like	5.077e-92	77.39
JPS_TRINITY_DN13306_c0_g1	1239	-0.308896	Fibrinogen Related Proteins	3.29694e-08	37.58	XP_018570871.1	uncharacterized protein LOC108910663	0	90.36
JPS_TRINITY_DN18239_c1_g1	444	2.81605	Fibrinogen Related Proteins	7.40846e-08	45.8	XP_023311881.1	zinc finger protein 271-like	5.14224e-57	80.14
JPS_TRINITY_DN3818_c0_g3	786	1.31191	Fibrinogen Related Proteins	9.22358e-08	50.48	XP_018568400.1	zinc finger protein 845-like	2.91972e-32	59.5
JPS_TRINITY_DN8559_c0_g1	966	-0.460106	Fibrinogen Related Proteins	1.08222e-07	48.63	XP_018568400.1	zinc finger protein 845-like	9.89976e-68	58.5
JPS_TRINITY_DN6050_c0_g1	873	1.95906	Fibrinogen Related Proteins	1.38237e-07	44.13	XP_018568362.2	zinc finger protein 480-like	1.47942e-69	65.17
JPS_TRINITY_DN23323_c0_g1	1734	0.265901	Fibrinogen Related Proteins	2.97962e-07	33.56	XP_023311881.1	zinc finger protein 271-like	1.072e-91	53.69
JPS_TRINITY_DN4839_c0_g1	747	0.382857	Fibrinogen Related Proteins	3.09012e-07	38.76	XP_018578239.1	zinc finger protein 708-like isoform X2	1.24482e-87	74.68
JPS_TRINITY_DN6915_c1_g3	402	2.11457	Fibrinogen Related Proteins	3.52818e-07	44.95	XP_023309765.1	zinc finger Y-chromosomal protein-like	7.59323e-35	69.66
JPS_TRINITY_DN12009_c0_g1	1632	0.278272	Fibrinogen Related Proteins	4.83751e-07	39.06	XP_018568400.1	zinc finger protein 845-like	5.08008e-153	62.57
JPS_TRINITY_DN4092_c0_g2	1143	1.54905	Fibrinogen Related Proteins	1.33043e-06	39.15	XP_018561801.1	zinc finger protein 90-like	7.25533e-111	66.76
JPS_TRINITY_DN7876_c0_g1	690	1.44748	Fibrinogen Related Proteins	2.83363e-06	39.15	XP_018568400.1	zinc finger protein 845-like	7.56998e-40	60
JPS_TRINITY_DN8129_c3_g1	939	3.05063	Fibrinogen Related Proteins	3.08682e-06	40.86	XP_018568387.1	zinc finger Y-chromosomal protein-like	4.19458e-112	66.85
JPS_TRINITY_DN81379_c0_g1	357	0.52569	Fibrinogen Related Proteins	3.87669e-06	44.94	XP_018332840.1	longitudinals lacking protein, isoforms H/M/V isoform X6	4.35252e-17	55.08
JPS_TRINITY_DN36250_c0_g1	450	1.63918	Fibrinogen Related Proteins	5.50805e-06	41.61	XP_023312813.1	zinc finger protein 90-like	2.29499e-50	67.33
JPS_TRINITY_DN6440_c0_g1	801	1.61992	Fibrinogen Related Proteins	6.85581e-06	39.59	XP_018568389.1	zinc finger protein 142-like	1.01104e-94	74.81
JPS_TRINITY_DN867_c0_g3	1500	1.70376	Fibrinogen Related Proteins	8.12998e-06	42.95	XP_018568400.1	zinc finger protein 845-like	3.93596e-89	52.98
JPS_TRINITY_DN130242_c0_g1	618	0.237721	Fibrinogen Related Proteins	6.70524e-09	42.86	XP_018576517.1	proteasome subunit beta type-3	2.23855e-152	99.51
JPS_TRINITY_DN12190_c0_g1	1161	-0.756308	Fibrinogen Related Proteins	1.30622e-70	53.43	JAB65863.1	Lysosomal aspartic protease	0	97.34
JPS_TRINITY_DN8091_c0_g1	1680	-1.9145	Fibrinogen Related Proteins	9.5215e-10	47.79	XP_018578964.1	transcription factor Ken	0	99.64
JPS_TRINITY_DN4173_c0_g1	1818	-0.864904	Fibrinogen Related Proteins	1.70156e-06	42.38	XP_018571336.1	protein hunchback-like	0	93.25
JPS_TRINITY_DN5893_c0_g1	1893	1.40809	Fibrinogen Related Proteins	3.49381e-94	62.98	XP_018571899.1	proto-oncogene tyrosine-protein kinase ROS	0	96.32
JPS_TRINITY_DN2701_c0_g1	1227	1.14149	Fibrinogen Related Proteins	6.30479e-30	44.27	XP_018563231.1	aspartic proteinase A2-like	0	92.16
JPS_TRINITY_DN40439_c0_g1	2001	2.63836	Fibrinogen Related Proteins	4.58803e-25	46.24	XP_018561671.1	zinc finger protein 260-like	0	78.96
JPS_TRINITY_DN3245_c0_g5	2100	1.69949	Fibrinogen Related Proteins	1.14124e-09	40.8	XP_018577913.1	zinc finger Y-chromosomal protein 2-like	1.75778e-168	58.76
JPS_TRINITY_DN11083_c0_g1	1347	0.475234	Fibrinogen Related Proteins	1.43328e-08	40.57	XP_018573520.1	zinc finger protein 761-like	2.63549e-92	56.41
JPS_TRINITY_DN28761_c0_g1	1902	-0.905655	Fibrinogen Related Proteins	5.19976e-61	56.91	XP_018565460.1	tyrosine-protein kinase transmembrane receptor Ror2	0	98.58
JPS_TRINITY_DN31564_c0_g1	1056	-0.982542	Fibrinogen Related Proteins	3.39254e-28	59.31	XP_018575142.1	protein snail homolog Sna-like	0	99.15
JPS_TRINITY_DN98645_c0_g1	351	0.484805	Fibrinogen Related Proteins	7.93238e-10	49.07	XP_004926734.1	zinc finger protein 26 isoform X1	2.14471e-13	57.45
JPS_TRINITY_DN882_c0_g2	1203	2.07881	Fibrinogen Related Proteins	4.02829e-07	37.74	XP_018568400.1	zinc finger protein 845-like	1.29179e-102	56.93
JPS_TRINITY_DN6712_c0_g1	1620	-0.929931	Fibrinogen Related Proteins	2.72116e-74	57.78	XP_018579743.1	tyrosine-protein kinase transmembrane receptor Ror isoform X2	0	97.22
JPS_TRINITY_DN16806_c0_g1	1563	0.252952	Fibrinogen Related Proteins	2.16722e-62	58.56	XP_018569746.1	tyrosine-protein kinase Src64B	0	95.83
JPS_TRINITY_DN13311_c0_g2	2868	-1.05465	Fibrinogen Related Proteins	2.05473e-40	49.51	XP_008199917.1	epithelial discoidin domain-containing receptor 1	0	93.99
JPS_TRINITY_DN1573_c1_g2	810	0.291975	Fibrinogen Related Proteins	4.58884e-35	45.81	KAF7286010.1	hypothetical protein	2.38936e-98	71.43
JPS_TRINITY_DN5878_c0_g1	1278	2.1734	Fibrinogen Related Proteins	6.44289e-27	39.85	XP_018562264.1	gastrula zinc finger protein XlCGF26.1-like	0	88.43
JPS_TRINITY_DN22357_c0_g1	1191	1.62745	Fibrinogen Related Proteins	1.33132e-25	44.01	XP_018570385.1	myoneurin-like	0	94.44
JPS_TRINITY_DN9183_c0_g1	1047	0.571886	Fibrinogen Related Proteins	2.23954e-25	42.9	XP_018577666.1	zinc finger protein 568-like	0	93.97
JPS_TRINITY_DN855_c0_g3	675	0.0561704	Fibrinogen Related Proteins	2.07904e-09	65.52	XP_018572495.1	zinc finger protein Xfin isoform X1	3.32605e-138	89.73
JPS_TRINITY_DN4912_c2_g4	4305	0.182144	Fibrinogen Related Proteins	2.48834e-07	41.95	XP_018572872.1	zinc finger protein 521-like	0	95.36
JPS_TRINITY_DN2613_c0_g1	1200	-0.165421	Fibrinogen Related Proteins	3.03287e-06	46	XP_018567446.1	uncharacterized protein LOC108908029 isoform X1	0	94.24
JPS_TRINITY_DN8880_c0_g1	2760	-1.23161	Fibrinogen Related Proteins	2.66099e-43	52.84	XP_023310727.1	discoidin domain-containing receptor 2-like	0	97.28
JPS_TRINITY_DN1460_c0_g1	2259	4.66389	Fibrinogen Related Proteins	3.11772e-43	67.08	XP_018563792.1	vascular endothelial growth factor receptor 1 isoform X2	0	85.98
JPS_TRINITY_DN1501_c0_g1	4215	2.75255	Fibrinogen Related Proteins	9.31019e-43	65.48	XP_018563785.1	vascular endothelial growth factor receptor 1 isoform X1	0	93.17
JPS_TRINITY_DN2368_c0_g1	918	0.535748	Fibrinogen Related Proteins	3.18214e-42	50.17	XP_018571411.1	fibroblast growth factor receptor 3	0	96.73
JPS_TRINITY_DN32125_c0_g1	1419	1.60152	Fibrinogen Related Proteins	2.12739e-31	43.73	XP_018570138.1	zinc finger protein 664-like	0	88.35
JPS_TRINITY_DN9435_c0_g1	1041	-0.0099304	Fibrinogen Related Proteins	1.16623e-11	53.24	XP_018562639.1	histone H4 transcription factor-like	1.38034e-154	87.92
JPS_TRINITY_DN5169_c2_g2	4725	0.854022	Fibrinogen Related Proteins	2.39876e-11	41.11	XP_018576958.1	uncharacterized protein LOC108915416	0	93.98
JPS_TRINITY_DN7879_c2_g1	1842	0.827859	Fibrinogen Related Proteins	1.03927e-06	36.84	XP_018575774.1	RE1-silencing transcription factor B-like isoform X1	0	79.64
JPS_TRINITY_DN419_c0_g1	1584	-2.07775	Fibrinogen Related Proteins	1.12182e-06	46.53	JAB63353.1	Putative fatty acyl-CoA reductase	0	94.12
JPS_TRINITY_DN1986_c1_g1	822	0.676491	Fibrinogen Related Proteins	3.65011e-23	51.3	XP_018574118.1	proteasome subunit beta type-7	0	98.53
JPS_TRINITY_DN5951_c0_g2	1344	1.61524	Fibrinogen Related Proteins	6.59731e-48	44.24	XP_018562620.1	zinc finger protein 2 homolog	0	87.96
JPS_TRINITY_DN9250_c0_g2	1149	2.03602	Fibrinogen Related Proteins	1.11315e-47	45.99	XP_018577964.1	zinc finger protein 235-like	0	95.82
JPS_TRINITY_DN39329_c0_g1	1197	0.911381	Fibrinogen Related Proteins	3.17555e-44	45.32	XP_018571736.1	gastrula zinc finger protein XlCGF52.1-like	0	95.5
JPS_TRINITY_DN15664_c0_g1	1188	1.54509	Fibrinogen Related Proteins	2.1426e-27	44.42	XP_018575150.1	zinc finger protein 41-like	0	87.5
JPS_TRINITY_DN4171_c0_g2	2823	1.77332	Fibrinogen Related Proteins	1.33627e-19	51.83	XP_018561523.1	MDS1 and EVI1 complex locus protein EVI1-like isoform X3	0	96.28
JPS_TRINITY_DN3987_c2_g1	1131	0.351729	Fibrinogen Related Proteins	1.46445e-13	38.46	XP_018568362.2	zinc finger protein 480-like	6.94628e-76	61.61
JPS_TRINITY_DN3713_c0_g1	2502	-0.858044	Fibrinogen Related Proteins	8.02798e-10	50	XP_018572507.1	B-cell lymphoma/leukemia 11A isoform X1	0	98.56
JPS_TRINITY_DN12677_c0_g1	903	1.16031	Fibrinogen Related Proteins	2.40664e-06	43.33	XP_018579715.1	zinc finger protein 425-like	2.00099e-113	70.61
JPS_TRINITY_DN4129_c0_g1	471	-3.04812	Fibrinogen Related Proteins	2.96713e-06	51.72	XP_023312015.1	transcriptional regulator of yeast form adherence 4-like	1.16953e-23	59.26
JPS_TRINITY_DN30045_c0_g1	2367	-0.564773	Fibrinogen Related Proteins	6.05404e-52	51.95	XP_018568526.1	tyrosine-protein kinase receptor torso isoform X2	0	90.8
JPS_TRINITY_DN10425_c0_g3	2763	-0.798606	Fibrinogen Related Proteins	1.0652e-45	52.96	XP_018565369.1	epithelial discoidin domain-containing receptor 1-like	0	98.04
JPS_TRINITY_DN6221_c0_g1	1314	1.01906	Fibrinogen Related Proteins	9.0916e-30	42.69	XP_018569496.1	zinc finger protein 625-like	0	90.89
JPS_TRINITY_DN11316_c0_g1	1095	0.748509	Fibrinogen Related Proteins	9.30096e-21	55.47	XP_018568121.1	transcriptional repressor protein YY1	0	99.45
JPS_TRINITY_DN5713_c0_g3	1581	0.80344	Fibrinogen Related Proteins	5.51571e-09	44.65	XP_018568385.1	zinc finger protein 99-like	3.3118e-135	58.61
JPS_TRINITY_DN4092_c0_g3	1143	0.618301	Fibrinogen Related Proteins	2.13613e-08	45.58	XP_018561801.1	zinc finger protein 90-like	1.24972e-101	65.05
JPS_TRINITY_DN1982_c0_g1	1041	0.0185026	Fibrinogen Related Proteins	4.9658e-08	37.65	XP_018566521.1	protein shifted isoform X1	0	97.69
JPS_TRINITY_DN3688_c0_g1	3855	1.21129	Fibrinogen Related Proteins	3.61826e-06	42.61	JAB64153.1	Extracellular domains-containing protein	0	96.26
JPS_TRINITY_DN3347_c0_g2	12483	0.586378	Fibrinogen Related Proteins	7.33733e-06	45.81	XP_018566495.1	uncharacterized protein LOC108907336	0	93.29
JPS_TRINITY_DN13650_c0_g1	1569	0.850692	Fibrinogen Related Proteins	2.32953e-31	48.8	XP_018569478.1	zinc finger protein 669-like	0	88.55
JPS_TRINITY_DN4402_c0_g2	1434	1.75084	Fibrinogen Related Proteins	2.28193e-26	48.94	XP_018571768.1	zinc finger protein 626-like	0	94.58
JPS_TRINITY_DN5127_c0_g1	2004	0.968518	Fibrinogen Related Proteins	3.95598e-26	48.29	XP_023310613.1	oocyte zinc finger protein XlCOF6	0	95.66
JPS_TRINITY_DN3581_c0_g1	1686	0.80196	Fibrinogen Related Proteins	2.27973e-22	46.4	XP_018576575.1	zinc finger protein 708-like	0	95.19
JPS_TRINITY_DN5630_c0_g1	345	0.76714	Fibrinogen Related Proteins	1.74243e-15	65.63	VEN53289.1	unnamed protein product, partial	5.66058e-49	81.74
JPS_TRINITY_DN4109_c2_g6	1572	1.88733	Fibrinogen Related Proteins	1.00033e-06	41.67	XP_023311901.1	zinc finger protein 729-like	3.80565e-171	67.58
JPS_TRINITY_DN3666_c0_g1	900	2.12264	Fibrinogen Related Proteins	3.47653e-08	56.98	XP_018577389.1	peptidyl-prolyl cis-trans isomerase E	0	97.99
JPS_TRINITY_DN8064_c0_g2	1152	-0.674426	Fibrinogen Related Proteins	1.03376e-06	52	XP_018561345.1	RNA binding protein fox-1 homolog 1-like isoform X2	2.78794e-156	99.05
JPS_TRINITY_DN6875_c0_g1	2127	0.361362	Fibrinogen Related Proteins	8.03174e-27	42.36	XP_018562801.1	BMP-binding endothelial regulator protein	0	96.57
JPS_TRINITY_DN1062_c0_g1	3153	-0.80179	Fibrinogen Related Proteins	7.7068e-19	39.72	XP_018570160.1	UDP-N-acetylglucosamine--peptide N-acetylglucosaminyltransferase 110 kDa subunit isoform X1	0	99.43
JPS_TRINITY_DN1720_c0_g1	3894	-2.56085	Fibrinogen Related Proteins	3.87886e-60	61.43	XP_023311155.1	receptor-type guanylate cyclase gcy-12-like	0	94.93
JPS_TRINITY_DN3629_c0_g1	1491	1.23996	Fibrinogen Related Proteins	5.67118e-51	55.36	XP_018576059.1	tyrosine-protein kinase CSK	0	99.4
JPS_TRINITY_DN3455_c0_g1	2229	0.719638	Fibrinogen Related Proteins	6.47874e-33	61.69	XP_018567837.1	platelet-derived growth factor receptor alpha isoform X1	0	93.32
JPS_TRINITY_DN30291_c0_g2	4206	0.716937	Fibrinogen Related Proteins	4.22675e-74	63.73	ANW09593.1	insulin receptor 1	0	100
JPS_TRINITY_DN3934_c0_g1	786	-0.868145	Fibrinogen Related Proteins	1.0511e-60	57.52	JAB66982.1	Tyrosine-protein kinase	0	99.62
JPS_TRINITY_DN7366_c0_g1	2187	0.198483	Fibrinogen Related Proteins	4.43354e-26	44.31	XP_018569640.1	putative tyrosine-protein kinase Wsck	0	94.78
JPS_TRINITY_DN578_c2_g2	1026	1.2289	Fibrinogen Related Proteins	2.65046e-89	69.06	XP_018564022.1	angiopoietin-related protein 7-like	4.41795e-112	68.32
JPS_TRINITY_DN24842_c0_g1	1275	3.29336	Fibrinogen Related Proteins	2.23028e-81	69.59	XP_023310093.1	microfibril-associated glycoprotein 4-like	0	86.79
JPS_TRINITY_DN21883_c0_g1	738	-1.26965	Fibrinogen Related Proteins	4.63612e-75	66.4	XP_018564093.1	angiopoietin-related protein 1-like	1.07052e-111	76.83
JPS_TRINITY_DN6420_c0_g1	861	3.15931	Fibrinogen Related Proteins	1.09074e-73	64.68	XP_018564013.1	fibrinogen C domain-containing protein 1-like isoform X2	2.35618e-141	82.17
JPS_TRINITY_DN302_c0_g1	1119	2.68291	Fibrinogen Related Proteins	1.37122e-66	60.27	XP_018564093.1	angiopoietin-related protein 1-like	2.93429e-154	74.94
JPS_TRINITY_DN29233_c0_g1	399	-2.10434	Fibrinogen Related Proteins	1.98625e-41	85.11	XP_018564036.1	connective tissue growth factor	7.93147e-66	99.25
JPS_TRINITY_DN17718_c0_g2	705	-1.51423	Fibrinogen Related Proteins	2.0915e-51	83.21	XP_018569893.1	angiopoietin-2-like isoform X1	6.38441e-135	96.6
JPS_TRINITY_DN6600_c0_g1	1899	-0.406913	Galectins	3.96072e-06	47.83	XP_018579850.1	tripartite motif-containing protein 45	0	96.68
JPS_TRINITY_DN5753_c0_g1	2694	-0.100457	Galectins	5.25834e-36	61.74	QJA18302.1	alpha actinin	0	100
JPS_TRINITY_DN142_c0_g1	11925	0.93109	Galectins	2.68673e-33	59.29	XP_018573463.1	spectrin alpha chain, non-erythrocytic 1 isoform X1	0	97.83
JPS_TRINITY_DN8350_c0_g1	1896	1.15489	Galectins	5.10019e-08	48.19	XP_018566735.1	plastin-2	0	99.05
JPS_TRINITY_DN22429_c0_g1	7269	1.27108	Galectins	2.209e-06	52.68	XP_018579175.1	protein abnormal spindle	0	86.65
JPS_TRINITY_DN206_c0_g1	25059	1.0536	Galectins	2.50799e-33	51.1	XP_018566024.1	microtubule-actin cross-linking factor 1 isoform X5	0	98.17
JPS_TRINITY_DN7531_c0_g1	663	-0.273454	Galectins	3.39687e-43	61.33	XP_018574242.1	galectin-4 isoform X2	2.89419e-126	87.33
JPS_TRINITY_DN6571_c0_g1	1212	0.551583	Galectins	1.51807e-65	76.97	XP_018571836.1	galectin-4 isoform X1	4.69267e-157	85.71
JPS_TRINITY_DN639_c0_g1	1035	3.74393	Glutathione Peroxidases	3.95418e-28	47.21	XP_018568290.1	CCAAT/enhancer-binding protein	0	99.42
JPS_TRINITY_DN1795_c0_g1	345	1.08363	Glutathione Peroxidases	1.69512e-12	70.51	XP_018573908.1	CCAAT/enhancer-binding protein gamma-like	7.65359e-74	100
JPS_TRINITY_DN4230_c0_g2	693	1.4427	Glutathione Peroxidases	9.99878e-84	84.81	XP_018566913.1	probable phospholipid hydroperoxide glutathione peroxidase	2.60745e-129	94.47
JPS_TRINITY_DN5217_c0_g1	6534	-1.29286	Heme Peroxidases	6.7646e-37	45.29	XP_018571397.1	protein sidekick	0	98.36
JPS_TRINITY_DN8365_c0_g1	1725	-1.38112	Heme Peroxidases	3.28051e-24	44.13	XP_018573364.1	protein turtle isoform X1	0	99.13
JPS_TRINITY_DN25110_c0_g1	2586	-1.39179	Heme Peroxidases	3.55693e-17	40.52	XP_018566969.1	irregular chiasm C-roughest protein-like isoform X2	0	98.9
JPS_TRINITY_DN3635_c0_g2	999	0.506623	Heme Peroxidases	4.09841e-15	42.22	XP_018565011.1	fibroblast growth factor receptor homolog 1-like isoform X2	3.05421e-149	79.11
JPS_TRINITY_DN1557_c0_g1	2784	0.220665	Heme Peroxidases	2.23625e-10	41.15	XP_018572198.1	uncharacterized protein LOC108911691	0	95.89
JPS_TRINITY_DN2920_c0_g1	1980	-2.05335	Heme Peroxidases	1.34047e-08	40.43	XP_018570338.1	nephrin, partial	0	100
JPS_TRINITY_DN4098_c0_g1	471	1.33275	Heme Peroxidases	2.16542e-07	51.22	XP_018576481.1	immunoglobulin domain-containing protein oig-4-like	4.86009e-98	98.69
JPS_TRINITY_DN12870_c0_g1	3618	-0.495866	Heme Peroxidases	3.57305e-49	45.47	XP_018579366.1	NADPH oxidase 5	0	95.38
JPS_TRINITY_DN2043_c0_g1	1878	-0.70185	Heme Peroxidases	2.00135e-27	45.61	XP_018575929.1	E3 SUMO-protein ligase PIAS2	0	96.48
JPS_TRINITY_DN36864_c0_g1	5007	-0.772105	Heme Peroxidases	3.46638e-38	37.77	XP_019880261.1	Down syndrome cell adhesion molecule-like protein Dscam2	0	94.69
JPS_TRINITY_DN16213_c0_g1	1236	-0.717066	Heme Peroxidases	5.42607e-25	46.89	XP_018565139.1	lachesin-like	0	95.12
JPS_TRINITY_DN2478_c0_g1	1101	-0.48955	Heme Peroxidases	2.80041e-24	44.98	XP_018563145.1	lachesin	0	98.37
JPS_TRINITY_DN5994_c0_g1	1230	-0.44323	Heme Peroxidases	3.10533e-20	43.79	XP_018561384.1	lachesin-like isoform X1	0	98.53
JPS_TRINITY_DN4914_c0_g1	903	-3.23918	Heme Peroxidases	8.30045e-20	45.02	XP_030748206.1	lachesin-like	3.13836e-161	85.42
JPS_TRINITY_DN2006_c0_g1	627	1.53984	Heme Peroxidases	3.20436e-13	53.49	JAB61218.1	Hemicentin-2, partial	4.25474e-81	75.52
JPS_TRINITY_DN51481_c0_g1	1224	0.263202	Heme Peroxidases	4.17903e-13	41.88	VEN52289.1	unnamed protein product	1.28485e-176	78.4
JPS_TRINITY_DN6085_c0_g1	2397	0.829083	Heme Peroxidases	7.16225e-12	48	XP_018578887.1	tyrosine-protein phosphatase 69D	0	96.49
JPS_TRINITY_DN31471_c0_g1	3327	-1.42976	Heme Peroxidases	1.0753e-47	50	XP_018563506.1	roundabout homolog 2-like	0	98.74
JPS_TRINITY_DN648_c0_g1	14463	0.629448	Heme Peroxidases	2.88286e-29	45.08	XP_023311218.1	titin isoform X1	0	99.14
JPS_TRINITY_DN1627_c0_g1	8850	1.02762	Heme Peroxidases	1.09339e-23	40.74	VEN50607.1	unnamed protein product, partial	0	79.66
JPS_TRINITY_DN9621_c0_g1	1992	0.862728	Heme Peroxidases	6.6141e-22	39.86	XP_018573358.1	protein borderless	0	95.17
JPS_TRINITY_DN7404_c0_g1	3996	-0.854186	Heme Peroxidases	9.91824e-22	44.03	XP_023310255.1	nephrin	0	99.09
JPS_TRINITY_DN3016_c1_g1	396	-1.60256	Heme Peroxidases	3.0972e-06	53.13	XP_023311998.1	neogenin isoform X1	5.99159e-76	96.15
JPS_TRINITY_DN565_c0_g2	459	0.90004	Heme Peroxidases	3.76695e-06	47.06	XP_018561980.1	troponin C isoform X3	1.61871e-103	100
JPS_TRINITY_DN4824_c0_g2	1209	-0.841752	Heme Peroxidases	5.96091e-18	43.62	XP_018578320.1	lachesin isoform X2	0	99
JPS_TRINITY_DN7243_c0_g1	4476	-0.718007	Heme Peroxidases	2.70154e-15	46.46	XP_018578398.1	adhesion G protein-coupled receptor A3	0	96.86
JPS_TRINITY_DN6497_c0_g2	624	0.259417	Heme Peroxidases	2.28219e-13	58.93	XP_023017393.1	slit homolog 3 protein-like	1.41022e-51	69
JPS_TRINITY_DN11744_c0_g1	2223	-4.55153	Heme Peroxidases	4.56723e-09	42.42	XP_017771245.1	nephrin	0	90.85
JPS_TRINITY_DN33152_c0_g2	747	-0.530721	Heme Peroxidases	7.26451e-09	45.52	XP_018565621.1	lachesin-like	2.2934e-152	94.17
JPS_TRINITY_DN11531_c0_g1	918	1.64635	Heme Peroxidases	3.16419e-08	40.78	XP_018566536.1	zwei Ig domain protein zig-8-like isoform X2	0	99.34
JPS_TRINITY_DN20875_c0_g1	912	-0.379981	Heme Peroxidases	1.42727e-07	48.36	XP_018572027.1	hemicentin-1-like, partial	1.38393e-113	78.28
JPS_TRINITY_DN1502_c0_g1	984	0.0136195	Heme Peroxidases	9.79344e-06	41.5	JAB62744.1	Protein turtle	6.31347e-166	99.59
JPS_TRINITY_DN39659_c1_g1	2628	-1.38606	Heme Peroxidases	4.37851e-28	43.54	XP_023309978.1	uncharacterized protein LOC108908606	0	93.57
JPS_TRINITY_DN54457_c0_g2	1125	-2.00468	Heme Peroxidases	6.28682e-18	50	XP_018561292.1	reticulon-4 receptor-like 2	0	98.4
JPS_TRINITY_DN11955_c0_g1	2952	-0.445214	Heme Peroxidases	1.76172e-09	46.56	XP_028155567.1	netrin receptor UNC5C isoform X2	0	92.28
JPS_TRINITY_DN13356_c0_g2	732	-1.52969	Heme Peroxidases	4.3809e-17	55.64	XP_023310328.1	slit homolog 3 protein-like	4.18908e-114	91.74
JPS_TRINITY_DN2497_c0_g1	783	-3.94944	Heme Peroxidases	2.40776e-13	43.97	XP_018565968.1	neural/ectodermal development factor IMP-L2 isoform X1	3.04126e-160	95.76
JPS_TRINITY_DN3912_c0_g1	1269	1.53429	Heme Peroxidases	6.34756e-06	59.09	XP_018562774.1	leucine-rich repeat-containing protein 27-like	0	90.59
JPS_TRINITY_DN40696_c0_g2	2139	-0.757162	Heme Peroxidases	4.30607e-17	40.61	XP_023310663.1	leucine-rich repeat-containing protein 24-like	0	95.22
JPS_TRINITY_DN4134_c0_g1	1047	0.758068	Heme Peroxidases	2.50798e-08	53.78	XP_018569561.1	slit homolog 3 protein isoform X1	1.09613e-160	89.08
JPS_TRINITY_DN18131_c0_g1	393	-1.18796	Heme Peroxidases	5.29161e-08	47.66	XP_018577220.1	Down syndrome cell adhesion molecule-like protein Dscam2 isoform X8	1.59577e-79	98.47
JPS_TRINITY_DN1015_c0_g1	1548	0.424185	Heme Peroxidases	1.17129e-89	58.39	XP_018579879.1	UDP-glucuronosyltransferase 1-8	0	93
JPS_TRINITY_DN1095_c0_g1	1569	0.442377	Heme Peroxidases	1.1175e-84	57.63	XP_018579876.1	UDP-glucuronosyltransferase 2B15	0	87.36
JPS_TRINITY_DN1095_c0_g2	1563	-0.0557187	Heme Peroxidases	5.20162e-84	59.05	XP_018579876.1	UDP-glucuronosyltransferase 2B15	0	91.11
JPS_TRINITY_DN55_c0_g1	1572	-0.752524	Heme Peroxidases	8.17309e-84	59.64	XP_018562683.1	uncharacterized protein LOC108904558	0	87.55
JPS_TRINITY_DN2745_c0_g1	1560	1.30796	Heme Peroxidases	6.88908e-83	56.52	XP_018563298.1	UDP-glucuronosyltransferase 2B10	0	95.95
JPS_TRINITY_DN29069_c0_g1	1572	-1.69123	Heme Peroxidases	9.90991e-82	58.23	XP_018562683.1	uncharacterized protein LOC108904558	0	83.9
JPS_TRINITY_DN6919_c0_g2	1542	0.159241	Heme Peroxidases	1.13757e-79	56.28	XP_018563300.1	UDP-glucuronosyltransferase 2B33-like	0	89.63
JPS_TRINITY_DN2694_c0_g1	1563	2.2919	Heme Peroxidases	3.34551e-79	55.33	JAB63808.1	UDP-glucuronosyltransferase 1-8	0	90.1
JPS_TRINITY_DN7813_c0_g1	1560	-0.820314	Heme Peroxidases	8.38138e-79	57.72	JAB67171.1	UDP-glucuronosyltransferase 1-8	0	88.69
JPS_TRINITY_DN1679_c0_g2	1569	1.61361	Heme Peroxidases	3.09508e-77	57.01	XP_018579875.1	UDP-glucuronosyltransferase 2B15-like	0	91.78
JPS_TRINITY_DN7277_c0_g1	1527	1.21251	Heme Peroxidases	3.17003e-75	57.44	XP_018562715.1	UDP-glucuronosyltransferase 2A3 isoform X1	0	93.25
JPS_TRINITY_DN1679_c0_g1	1545	0.369391	Heme Peroxidases	4.04282e-75	55.66	JAB63807.1	UDP-glucuronosyltransferase 2A3	0	93.77
JPS_TRINITY_DN6032_c0_g2	1536	-0.618421	Heme Peroxidases	3.56315e-74	56.1	XP_018579881.1	UDP-glucuronosyltransferase 2B7-like	0	90.95
JPS_TRINITY_DN6919_c0_g1	1542	-0.432998	Heme Peroxidases	1.03662e-71	53.1	XP_018563264.1	UDP-glucuronosyltransferase 2B37	0	93.96
JPS_TRINITY_DN1409_c0_g1	1545	-0.639772	Heme Peroxidases	2.75395e-63	52.27	XP_018570346.1	UDP-glucuronosyltransferase 1-3 isoform X1	0	93.39
JPS_TRINITY_DN2800_c0_g1	1536	-0.232522	Heme Peroxidases	2.77916e-63	54.03	XP_018570348.1	UDP-glucuronosyltransferase 1-8	0	91.59
JPS_TRINITY_DN9521_c0_g2	1581	-0.71609	Heme Peroxidases	5.35054e-62	52.43	XP_018561400.1	UDP-glucuronosyltransferase 2C1-like	0	98.48
JPS_TRINITY_DN4254_c0_g1	1566	-0.0928217	Heme Peroxidases	1.34937e-56	51.12	XP_018573569.1	UDP-glucuronosyltransferase 2B7	0	97.7
JPS_TRINITY_DN7739_c0_g1	1575	-1.50322	Heme Peroxidases	9.59729e-56	52.29	XP_018568773.2	UDP-glucuronosyltransferase 2B9	0	88.93
JPS_TRINITY_DN75658_c0_g1	1566	0.357202	Heme Peroxidases	2.33891e-55	51.42	XP_018566903.1	UDP-glucuronosyltransferase 2B15-like	0	89.31
JPS_TRINITY_DN4538_c0_g2	1632	-0.758997	Heme Peroxidases	9.45287e-55	51.25	XP_018568770.1	UDP-glucuronosyltransferase 2B19 isoform X1	0	89.72
JPS_TRINITY_DN65_c0_g1	1530	-1.38619	Heme Peroxidases	1.37154e-53	50.45	XP_023019046.1	UDP-glucuronosyltransferase 2B33-like	0	73.12
JPS_TRINITY_DN1981_c0_g2	1554	0.167358	Heme Peroxidases	4.3684e-52	52.29	XP_018572801.1	UDP-glucuronosyltransferase 2B7	0	94.97
JPS_TRINITY_DN7059_c0_g1	1548	-3.02836	Heme Peroxidases	3.26438e-51	48.36	XP_018561504.1	UDP-glucuronosyltransferase 2B37 isoform X1	0	82.36
JPS_TRINITY_DN8360_c0_g1	1548	0.0495632	Heme Peroxidases	1.19519e-49	51.16	XP_018561584.1	uncharacterized protein LOC108903775	0	88.87
JPS_TRINITY_DN4889_c0_g1	1602	-0.514573	Heme Peroxidases	1.28948e-48	50	XP_018561499.1	UDP-glucuronosyltransferase 2B7-like	0	84.57
JPS_TRINITY_DN4358_c0_g1	1566	-0.0621465	Heme Peroxidases	1.66607e-46	49.66	XP_018564526.1	UDP-glucuronosyltransferase 2B13-like	0	96.93
JPS_TRINITY_DN14527_c0_g1	1563	-1.02497	Heme Peroxidases	2.70218e-46	48.77	XP_018573571.1	UDP-glucuronosyltransferase 2B7-like	0	82.91
JPS_TRINITY_DN164_c1_g2	1563	-1.8337	Heme Peroxidases	2.48491e-45	48.42	XP_018561584.1	uncharacterized protein LOC108903775	0	89.6
JPS_TRINITY_DN10923_c1_g1	1575	-0.120197	Heme Peroxidases	2.72728e-44	49.53	XP_018561520.1	UDP-glucuronosyltransferase 2B7-like	0	92.31
JPS_TRINITY_DN4510_c0_g1	1554	0.348756	Heme Peroxidases	5.7657e-44	49.89	XP_023310147.1	UDP-glucuronosyltransferase 2B16-like isoform X1	0	90.12
JPS_TRINITY_DN7059_c0_g2	1584	-0.408666	Heme Peroxidases	1.24194e-43	49.03	XP_018561507.1	UDP-glucuronosyltransferase 2B7	0	87.82
JPS_TRINITY_DN8018_c0_g1	1545	-1.08115	Heme Peroxidases	5.94128e-43	48.13	XP_018561529.1	UDP-glucuronosyltransferase 2B15-like	0	88.24
JPS_TRINITY_DN64220_c0_g1	1533	0.207931	Heme Peroxidases	1.57363e-42	51.89	XP_018561527.1	UDP-glucuronosyltransferase 2B7-like isoform X1	0	85.04
JPS_TRINITY_DN9062_c0_g1	765	-0.425449	Heme Peroxidases	9.11903e-37	60.44	XP_018562683.1	uncharacterized protein LOC108904558	1.79879e-140	88.98
JPS_TRINITY_DN55_c2_g1	309	-1.17259	Heme Peroxidases	1.14629e-36	74.76	JAB64469.1	UDP-glucuronosyltransferase 2B31	1.38419e-52	87.38
JPS_TRINITY_DN7059_c2_g1	1011	-1.3988	Heme Peroxidases	4.87812e-32	45.19	XP_018561507.1	UDP-glucuronosyltransferase 2B7	8.51051e-157	83.23
JPS_TRINITY_DN9234_c0_g1	537	-1.46867	Heme Peroxidases	1.21947e-25	58.1	XP_018562683.1	uncharacterized protein LOC108904558	4.09498e-78	85.47
JPS_TRINITY_DN14926_c0_g1	459	0.87347	Heme Peroxidases	1.50459e-25	64	JAB61361.1	UDP-glucuronosyltransferase 2B15	4.97435e-95	94.08
JPS_TRINITY_DN6919_c1_g1	411	-0.64159	Heme Peroxidases	5.69366e-11	50.88	XP_018563264.1	UDP-glucuronosyltransferase 2B37	8.59554e-67	82.48
JPS_TRINITY_DN1723_c4_g1	2028	-0.365657	Heme Peroxidases	5.63875e-27	43.09	XP_018568718.1	leucine-rich repeat-containing protein 4	0	97.93
JPS_TRINITY_DN4975_c0_g1	1248	0.713192	Heme Peroxidases	3.44408e-11	49.66	XP_018568769.1	leucine-rich repeat, immunoglobulin-like domain and transmembrane domain-containing protein 3	0	94.46
JPS_TRINITY_DN7305_c0_g1	4596	-1.15155	Heme Peroxidases	5.45567e-12	55.74	XP_018566000.1	nuclear receptor coactivator 6	0	94.23
JPS_TRINITY_DN8910_c0_g1	429	-1.18174	Heme Peroxidases	2.67271e-11	60.78	XP_018565548.1	Kv channel-interacting protein 4-like	1.23707e-98	99.3
JPS_TRINITY_DN4186_c0_g1	2442	0.153017	Heme Peroxidases	2.97158e-46	45.85	XP_018566623.1	leucine-rich repeats and immunoglobulin-like domains protein 2 isoform X2	0	98.03
JPS_TRINITY_DN96126_c0_g1	2532	-0.789262	Heme Peroxidases	5.38525e-15	42.16	XP_018569481.1	follistatin-related protein 5-like	0	97.62
JPS_TRINITY_DN14993_c0_g1	1134	0.411624	Heme Peroxidases	2.45891e-11	56.78	XP_018561165.1	leucine-rich repeat-containing protein 15-like	6.22592e-169	86.74
JPS_TRINITY_DN8268_c0_g1	606	-1.21639	Heme Peroxidases	8.78353e-10	45.45	XP_028128358.1	lachesin-like	7.53275e-142	98.51
JPS_TRINITY_DN8422_c0_g2	3747	0.573304	Heme Peroxidases	4.23828e-37	47.47	XP_018565737.1	neuroglian isoform X1	0	96.47
JPS_TRINITY_DN8422_c0_g3	3747	0.573304	Heme Peroxidases	4.23828e-37	47.47	XP_018565737.1	neuroglian isoform X1	0	96.47
JPS_TRINITY_DN308_c0_g1	6615	0.633163	Heme Peroxidases	1.61122e-28	44.97	XP_023311883.1	basement membrane-specific heparan sulfate proteoglycan core protein-like	0	92.56
JPS_TRINITY_DN4776_c0_g1	4179	0.179693	Heme Peroxidases	3.93673e-17	47.37	XP_018574015.1	uncharacterized protein LOC108913039	0	91.64
JPS_TRINITY_DN4992_c0_g1	1248	-0.697038	Heme Peroxidases	4.31323e-13	40.63	XP_018561252.1	lachesin-like isoform X4	0	98.97
JPS_TRINITY_DN11040_c0_g1	480	1.18084	Heme Peroxidases	2.05023e-08	48	XP_018576480.1	immunoglobulin domain-containing protein oig-4-like	2.08443e-103	98.74
JPS_TRINITY_DN5671_c0_g1	1347	-0.523024	Heme Peroxidases	1.89503e-07	54.55	XP_023310564.1	uncharacterized protein LOC108917624	6.1593e-142	82.69
JPS_TRINITY_DN18851_c0_g3	840	1.07811	Heme Peroxidases	2.95555e-07	44.44	XP_018578549.1	basigin	1.98027e-144	83.99
JPS_TRINITY_DN1875_c0_g1	513	-0.056728	Heme Peroxidases	1.21728e-12	55.28	XP_018319987.1	calcineurin subunit B type 2	9.27831e-120	100
JPS_TRINITY_DN27796_c0_g2	678	-1.24697	Heme Peroxidases	4.33312e-22	47.03	XP_028149779.1	Down syndrome cell adhesion molecule-like protein Dscam2	5.2039e-162	98.23
JPS_TRINITY_DN7317_c0_g1	783	-0.036408	Heme Peroxidases	1.54723e-15	53.66	XP_018568604.1	carboxypeptidase N subunit 2	2.61983e-154	89.62
JPS_TRINITY_DN8903_c0_g1	894	-1.10264	Heme Peroxidases	5.3732e-07	40.89	XP_018566196.1	neurotrimin-like	0	99.27
JPS_TRINITY_DN8217_c0_g1	3054	-0.842759	Heme Peroxidases	1.67373e-06	39.07	XP_018570714.1	titin, partial	0	91.05
JPS_TRINITY_DN5929_c0_g1	519	1.02821	Heme Peroxidases	3.54275e-09	56.38	XP_018572981.1	caltractin	9.13984e-115	98.84
JPS_TRINITY_DN12959_c0_g1	3306	-2.00618	Heme Peroxidases	2.12882e-37	44.13	XP_023311433.1	protogenin-like, partial	0	92.76
JPS_TRINITY_DN14265_c0_g1	2931	0.39383	Heme Peroxidases	1.93581e-34	46.58	XP_023310489.1	roundabout homolog 1-like	0	97.2
JPS_TRINITY_DN1104_c0_g1	1437	0.512508	Heme Peroxidases	2.68501e-18	50.29	XP_018567793.1	lachesin isoform X7	0	83.05
JPS_TRINITY_DN133238_c0_g1	522	-0.823865	Heme Peroxidases	2.14917e-09	41.95	XP_028134430.1	Down syndrome cell adhesion molecule-like protein Dscam2	1.06242e-105	97.13
JPS_TRINITY_DN0_c0_g1	20280	0.00319481	Heme Peroxidases	4.18372e-32	43.2	XP_018566559.1	twitchin isoform X6	0	99.23
JPS_TRINITY_DN2537_c0_g1	12081	0.277398	Heme Peroxidases	7.32593e-31	41.81	XP_018574013.1	titin isoform X5	0	96.75
JPS_TRINITY_DN2353_c0_g1	3792	0.880608	Heme Peroxidases	4.64759e-29	42.63	XP_018578918.1	contactin	0	96.36
JPS_TRINITY_DN15897_c0_g1	5634	-1.13707	Heme Peroxidases	6.60268e-29	43.86	XP_023313057.1	Down syndrome cell adhesion molecule-like protein Dscam2	0	97.47
JPS_TRINITY_DN1893_c0_g1	2223	-0.255683	Heme Peroxidases	1.98153e-27	44.76	XP_018566482.1	leucine-rich repeat-containing protein 24	0	96.89
JPS_TRINITY_DN9780_c0_g1	3738	-1.92599	Heme Peroxidases	3.98922e-24	41.74	XP_018575463.1	hemicentin-1	0	98.79
JPS_TRINITY_DN35_c0_g3	2676	-0.54049	Heme Peroxidases	3.32641e-22	43.51	XP_018572174.1	uncharacterized protein LOC108911666	0	96.86
JPS_TRINITY_DN10893_c0_g1	1071	0.949864	Heme Peroxidases	2.61029e-14	56.48	XP_018579194.1	slit homolog 3 protein-like	0	94.1
JPS_TRINITY_DN10027_c0_g1	1794	-2.59284	Heme Peroxidases	2.6458e-09	44.63	XP_019881306.1	nephrin-like	0	92.32
JPS_TRINITY_DN6036_c0_g2	573	-0.545989	Heme Peroxidases	8.73228e-10	59.26	XP_008199786.1	neurocalcin homolog isoform X1	1.2123e-140	100
JPS_TRINITY_DN1599_c0_g1	702	0.982204	Heme Peroxidases	3.6564e-06	42.77	XP_018566237.1	neo-calmodulin-like isoform X2	1.82083e-160	99.57
JPS_TRINITY_DN7753_c0_g1	1353	0.336959	IMD Pathway Members	1.00536e-19	48.22	XP_018569891.1	integrin-linked protein kinase	0	98.67
JPS_TRINITY_DN6593_c0_g1	2154	-0.795844	IMD Pathway Members	2.2747e-49	56.67	EFA01718.1	Mitogen-activated protein kinase kinase kinase-like Protein	0	91.3
JPS_TRINITY_DN4166_c0_g1	2463	-1.34734	IMD Pathway Members	2.60917e-45	55.64	XP_018568343.1	mitogen-activated protein kinase kinase kinase 13 isoform X1	0	98.3
JPS_TRINITY_DN5119_c0_g1	1341	-0.307501	IMD Pathway Members	3.82891e-19	45.71	JAB65858.1	FAS-associated factor	0	98.88
JPS_TRINITY_DN4103_c0_g1	822	-3.97912	IMD Pathway Members	1.39937e-28	51.47	XP_018575803.1	serine/threonine-protein kinase Nek8-like	0	99.27
JPS_TRINITY_DN1573_c1_g1	1722	-0.8455	IMD Pathway Members	1.38435e-21	44.51	XP_018563389.1	activin receptor type-1	0	98.35
JPS_TRINITY_DN5831_c0_g2	2421	-2.0778	IMD Pathway Members	1.21085e-13	44.44	XP_018570429.1	activin receptor type-2A	0	96.41
JPS_TRINITY_DN1851_c0_g1	1347	-0.399239	IMD Pathway Members	1.32277e-29	49.28	XP_018561202.1	kinase suppressor of Ras 2 isoform X2	0	99.11
JPS_TRINITY_DN2108_c0_g1	3810	-0.816986	IMD Pathway Members	1.30364e-24	47.49	XP_018571882.1	mitogen-activated protein kinase kinase kinase 4	0	94.3
JPS_TRINITY_DN78_c0_g1	6960	0.343757	IMD Pathway Members	2.45589e-24	46.62	XP_023311679.1	titin	0	98.92
JPS_TRINITY_DN3625_c0_g1	2772	0.741961	IMD Pathway Members	6.74418e-19	45.53	XP_018566513.1	dual serine/threonine and tyrosine protein kinase-like isoform X1	0	98.25
JPS_TRINITY_DN82837_c0_g1	1521	-3.64005	IMD Pathway Members	2.0233e-22	46.29	XP_023312245.1	bone morphogenetic protein receptor type-1B-like	0	86.45
JPS_TRINITY_DN82_c0_g1	1533	-0.270224	IMD Pathway Members	1.45072e-19	44.85	XP_018576589.1	bone morphogenetic protein receptor type-1B isoform X1	0	98.98
JPS_TRINITY_DN7238_c0_g1	1581	-1.44844	IMD Pathway Members	2.04327e-18	46.21	XP_018565819.1	activin receptor type-2A	0	95.44
JPS_TRINITY_DN2444_c0_g1	1374	-0.684314	IMD Pathway Members	1.51748e-10	47.09	XP_023310609.1	casein kinase I isoform X1	0	99.78
JPS_TRINITY_DN120241_c0_g1	936	-1.64746	IMD Pathway Members	4.74323e-06	54.84	XP_018568869.1	SRSF protein kinase 3-like	0	99.36
JPS_TRINITY_DN8164_c0_g1	1524	0.610176	IMD Pathway Members	5.77149e-14	45.97	XP_015839473.1	serine/threonine-protein kinase Doa isoform X6	0	96.8
JPS_TRINITY_DN19947_c0_g1	2133	1.50582	IMD Pathway Members	5.48455e-34	45.41	XP_018562814.1	inhibitor of nuclear factor kappa-B kinase subunit epsilon-like	0	88.06
JPS_TRINITY_DN3459_c0_g1	957	0.649286	IMD Pathway Members	4.47362e-16	43.39	XP_018564477.1	serine/threonine-protein kinase 16	0	98.11
JPS_TRINITY_DN488_c0_g1	1707	1.42479	IMD Pathway Members	1.16626e-06	42.03	XP_018577735.1	SRSF protein kinase 1	0	98.77
JPS_TRINITY_DN6262_c0_g1	2193	2.13552	IMD Pathway Members	1.73174e-33	44.06	XP_018575342.1	serine/threonine-protein kinase TBK1	0	99.18
JPS_TRINITY_DN3695_c0_g1	1218	-0.155418	IMD Pathway Members	2.24219e-06	48.65	XP_018563136.1	tau-tubulin kinase homolog Asator isoform X4	0	99.73
JPS_TRINITY_DN5993_c0_g1	6798	-0.135503	IMD Pathway Members	2.03133e-21	46.3	XP_018576821.1	leucine-rich repeat serine/threonine-protein kinase 1	0	98.76
JPS_TRINITY_DN18965_c0_g1	3123	0.485937	IMD Pathway Members	1.11796e-29	51.33	XP_018569631.1	cGMP-dependent protein kinase, isozyme 1 isoform X1	0	78.69
JPS_TRINITY_DN6541_c0_g2	1281	1.4242	IMD Pathway Members	8.5434e-07	51.64	XP_018577606.2	MAPK/MAK/MRK overlapping kinase-like	0	89.72
JPS_TRINITY_DN1685_c0_g1	1365	1.62875	IMD Pathway Members	5.6945e-07	55.86	XP_018561746.1	UBX domain-containing protein 4 isoform X1	0	92.75
JPS_TRINITY_DN8718_c0_g1	957	-1.43321	IMD Pathway Members	3.77262e-14	44.6	XP_018562669.1	lymphokine-activated killer T-cell-originated protein kinase	1.19328e-179	91.35
JPS_TRINITY_DN693_c0_g1	996	0.442457	IMD Pathway Members	5.61517e-08	42.54	XP_018576464.1	casein kinase I isoform X2	0	99.7
JPS_TRINITY_DN11750_c0_g1	1524	-0.424708	IMD Pathway Members	8.10381e-25	52.89	XP_023016194.1	TGF-beta receptor type-1 isoform X4	0	91.24
JPS_TRINITY_DN3363_c0_g1	4485	-0.15833	IMD Pathway Members	7.70532e-17	45.42	XP_018562245.1	receptor-type guanylate cyclase Gyc76C isoform X1	0	97.19
JPS_TRINITY_DN651_c0_g1	1578	1.61654	IMD Pathway Members	1.86836e-38	49.37	XP_018567507.1	NF-kappa-B essential modulator isoform X2	0	89.96
JPS_TRINITY_DN2295_c0_g1	1461	2.5754	IMD Pathway Members	9.15868e-20	49.17	XP_018567477.1	NF-kappa-B essential modulator isoform X1	4.70713e-129	67.55
JPS_TRINITY_DN22813_c0_g1	1779	-0.234575	IMD Pathway Members	5.55402e-27	50.2	XP_023309722.1	atrial natriuretic peptide receptor 1	0	98.65
JPS_TRINITY_DN3275_c0_g1	429	1.63776	IMD Pathway Members	1.0506e-21	71.7	XP_018561259.1	mitogen-activated protein kinase kinase kinase 7	1.49126e-64	93.57
JPS_TRINITY_DN9188_c0_g2	1476	-1.48361	IMD Pathway Members	3.72946e-18	49.3	XP_018569613.1	membrane-associated tyrosine- and threonine-specific cdc2-inhibitory kinase isoform X1	0	96.33
JPS_TRINITY_DN28207_c0_g1	1773	0.269284	IMD Pathway Members	3.71364e-17	48	XP_018574040.1	dual specificity protein kinase Ttk	0	84.73
JPS_TRINITY_DN85141_c0_g1	495	-0.443335	IMD Pathway Members	3.03684e-18	66.67	XP_018577243.1	uncharacterized protein LOC108915637	1.66874e-67	85.63
JPS_TRINITY_DN1171_c0_g1	1302	-1.60837	Inhibitors of Apoptosis	3.60474e-14	64.62	JAB64009.1	E3 ubiquitin-protein ligase MYLIP	0	98.38
JPS_TRINITY_DN1992_c0_g1	1848	0.318829	Inhibitors of Apoptosis	2.45349e-07	45.51	XP_018567039.1	serine/threonine-protein kinase PINK1, mitochondrial	0	95.77
JPS_TRINITY_DN15715_c0_g1	615	0.736494	Inhibitors of Apoptosis	2.16823e-13	50.34	XP_018561931.1	ubiquitin-conjugating enzyme E2 S	2.38616e-130	99.45
JPS_TRINITY_DN3601_c0_g2	945	-2.1372	Inhibitors of Apoptosis	1.30755e-23	64.29	KAE9523873.1	hypothetical protein	2.4907e-58	61.45
JPS_TRINITY_DN7969_c1_g1	441	-3.1306	Inhibitors of Apoptosis	1.57979e-13	67.57	XP_025830429.1	piggyBac transposable element-derived protein 4-like	5.2453e-48	83.33
JPS_TRINITY_DN11756_c1_g1	1755	-1.83602	Inhibitors of Apoptosis	4.74416e-10	64	XP_028173396.1	piggyBac transposable element-derived protein 4-like	3.96691e-178	67.79
JPS_TRINITY_DN66920_c0_g1	894	-4.16447	Inhibitors of Apoptosis	1.02552e-09	69.12	XP_030748974.1	piggyBac transposable element-derived protein 4-like isoform X2	8.9225e-168	89.25
JPS_TRINITY_DN31608_c0_g2	1389	0.854425	Inhibitors of Apoptosis	4.51401e-09	55.84	XP_031332263.1	piggyBac transposable element-derived protein 4-like	2.11919e-175	73.16
JPS_TRINITY_DN11408_c1_g1	1515	-2.84061	Inhibitors of Apoptosis	5.97513e-09	58.7	XP_030751419.1	uncharacterized protein LOC115878952	1.28893e-91	64.15
JPS_TRINITY_DN6771_c1_g1	1509	-2.87682	Inhibitors of Apoptosis	8.62238e-09	56.52	KAB0790392.1	hypothetical protein, partial	1.80789e-172	80.41
JPS_TRINITY_DN26648_c0_g1	720	-2.59048	Inhibitors of Apoptosis	3.50914e-08	57.14	XP_030751419.1	uncharacterized protein LOC115878952	1.18342e-75	75.68
JPS_TRINITY_DN39586_c0_g2	1878	0.220604	Inhibitors of Apoptosis	5.25075e-08	63.24	XP_022183876.1	piggyBac transposable element-derived protein 4-like	1.56575e-180	62.38
JPS_TRINITY_DN62930_c0_g1	861	0.478304	Inhibitors of Apoptosis	5.95214e-07	64.29	XP_013185187.1	piggyBac transposable element-derived protein 3-like	5.96349e-110	73.94
JPS_TRINITY_DN21579_c0_g1	606	-1.74888	Inhibitors of Apoptosis	6.47893e-07	56.41	PSN38182.1	hypothetical protein	1.29097e-90	79.59
JPS_TRINITY_DN71194_c0_g2	429	-0.463168	Inhibitors of Apoptosis	1.20276e-06	56.52	XP_031343697.1	piggyBac transposable element-derived protein 3-like	1.34284e-59	74.82
JPS_TRINITY_DN67182_c0_g1	444	-2.25861	Inhibitors of Apoptosis	1.64515e-06	66.67	XP_022188476.1	piggyBac transposable element-derived protein 3-like	5.56418e-57	79.41
JPS_TRINITY_DN55574_c0_g1	1206	-1.5477	Inhibitors of Apoptosis	2.05146e-06	60.94	KAB0795637.1	hypothetical protein	5.07207e-133	75.75
JPS_TRINITY_DN12782_c0_g3	1752	-2.92278	Inhibitors of Apoptosis	4.54615e-06	61.97	XP_023019185.1	piggyBac transposable element-derived protein 4-like	0	72.44
JPS_TRINITY_DN73_c0_g3	504	-0.156302	Inhibitors of Apoptosis	8.44168e-13	49.38	XP_028147484.1	ubiquitin-conjugating enzyme E2 G2	2.68493e-121	100
JPS_TRINITY_DN5814_c0_g2	444	-0.616585	Inhibitors of Apoptosis	1.11473e-11	50.53	XP_032305809.1	ubiquitin-conjugating enzyme E2-17 kDa isoform X1	9.83011e-108	100
JPS_TRINITY_DN5695_c0_g2	600	0.625696	Inhibitors of Apoptosis	1.53213e-07	57.89	XP_018570549.1	ubiquitin-conjugating enzyme E2-22 kDa	1.2162e-137	100
JPS_TRINITY_DN932_c0_g1	546	-0.165397	Inhibitors of Apoptosis	1.37561e-06	51.16	XP_966439.1	ubiquitin-conjugating enzyme E2 H	2.09476e-118	100
JPS_TRINITY_DN16843_c0_g1	1848	0.3446	Inhibitors of Apoptosis	2.80146e-27	49.66	XP_018569004.1	calcium/calmodulin-dependent protein kinase kinase	0	91.65
JPS_TRINITY_DN3070_c0_g1	1665	0.760345	Inhibitors of Apoptosis	5.64771e-25	51.2	XP_018577286.1	serine/threonine-protein kinase dyf-5 isoform X2	0	97.3
JPS_TRINITY_DN6167_c0_g2	978	1.9214	Inhibitors of Apoptosis	7.82282e-23	52.49	XP_018563358.1	cyclin-dependent kinase 20-like	0	97.54
JPS_TRINITY_DN12152_c0_g2	1212	1.36981	Inhibitors of Apoptosis	2.40428e-21	51.46	XP_018577557.1	cyclin-dependent kinase 10	0	99.75
JPS_TRINITY_DN98449_c0_g1	465	1.27678	Inhibitors of Apoptosis	5.62818e-10	53.93	XP_018565262.1	ubiquitin-conjugating enzyme E2 L3	1.52202e-110	100
JPS_TRINITY_DN5606_c0_g1	1602	-0.0528795	Inhibitors of Apoptosis	2.26491e-06	46.74	XP_018571066.1	RING finger and SPRY domain-containing protein 1	0	98.87
JPS_TRINITY_DN12283_c0_g1	426	-1.06145	Inhibitors of Apoptosis	1.96869e-07	54.22	XP_018566564.1	serine/threonine-protein kinase ULK3-like	9.6121e-81	94.33
JPS_TRINITY_DN4935_c0_g1	483	0.405554	Inhibitors of Apoptosis	1.60836e-10	50	XP_018577329.1	SUMO-conjugating enzyme UBC9-B isoform X1	2.37207e-115	98.75
JPS_TRINITY_DN3805_c0_g1	483	0.219516	Inhibitors of Apoptosis	2.16391e-10	49.24	XP_018574724.1	SUMO-conjugating enzyme UBC9-B	3.49701e-118	100
JPS_TRINITY_DN4165_c0_g1	1314	1.34878	Inhibitors of Apoptosis	8.29148e-08	66.67	ALF12302.1	vacuolar protein sorting 4	0	99.77
JPS_TRINITY_DN13524_c1_g1	1542	0.400134	Inhibitors of Apoptosis	1.01818e-33	50.76	XP_018571651.1	RAC serine/threonine-protein kinase	0	99.42
JPS_TRINITY_DN3304_c0_g2	4101	0.497907	Inhibitors of Apoptosis	1.19908e-28	52.77	XP_018568812.1	rho-associated protein kinase 1 isoform X1	0	98.46
JPS_TRINITY_DN2679_c0_g2	1233	-0.375068	Inhibitors of Apoptosis	1.11036e-20	46.13	XP_018577335.1	dual specificity mitogen-activated protein kinase kinase 4 isoform X1	0	98.29
JPS_TRINITY_DN14810_c0_g1	525	0.591778	Inhibitors of Apoptosis	3.64272e-10	46.77	XP_018570996.1	ubiquitin-conjugating enzyme E2 C	2.01043e-126	98.85
JPS_TRINITY_DN1291_c0_g1	579	1.42343	Inhibitors of Apoptosis	4.42614e-06	44.44	XP_023028717.1	NEDD8-conjugating enzyme Ubc12 isoform X1	1.46893e-137	98.96
JPS_TRINITY_DN21238_c0_g1	1137	1.4172	Inhibitors of Apoptosis	1.64234e-32	45.7	XP_018567089.1	cyclin-dependent kinase-like 1	0	99.74
JPS_TRINITY_DN2427_c1_g1	1161	0.728717	Inhibitors of Apoptosis	4.37983e-29	50.18	XP_018578127.1	death-associated protein kinase related-like	0	97.85
JPS_TRINITY_DN2467_c0_g1	1743	0.419491	Inhibitors of Apoptosis	1.37662e-21	49.58	XP_018570076.1	serine/threonine-protein kinase OSR1	0	99.11
JPS_TRINITY_DN79_c0_g1	1164	0.412925	Inhibitors of Apoptosis	3.53865e-40	52.88	XP_018574202.1	phosphorylase b kinase gamma catalytic chain, skeletal muscle/heart isoform isoform X2	0	98.45
JPS_TRINITY_DN2139_c0_g1	2934	-0.244383	Inhibitors of Apoptosis	1.85459e-35	50.68	XP_018567825.1	ribosomal protein S6 kinase alpha-5 isoform X1	0	98.16
JPS_TRINITY_DN1007_c0_g1	4053	0.693729	Inhibitors of Apoptosis	1.01199e-34	53.96	XP_018577649.1	serine/threonine-protein kinase 10 isoform X3	0	97.87
JPS_TRINITY_DN2588_c0_g1	1803	-0.120959	Inhibitors of Apoptosis	6.44686e-30	50	XP_018575729.1	myosin light chain kinase, smooth muscle	0	97.5
JPS_TRINITY_DN6974_c0_g1	1428	-0.724246	Inhibitors of Apoptosis	8.84355e-25	45.21	XP_018567472.1	MAP kinase-interacting serine/threonine-protein kinase 1	0	99.16
JPS_TRINITY_DN13333_c0_g1	1509	0.849181	Inhibitors of Apoptosis	5.02975e-07	46.28	XP_018564702.1	serine/threonine-protein kinase Nek2-like	0	83.93
JPS_TRINITY_DN6248_c0_g1	1560	1.45864	Inhibitors of Apoptosis	7.11149e-35	50	XP_018565640.1	serine/threonine-protein kinase 3-like	0	99.4
JPS_TRINITY_DN4008_c0_g2	2253	-1.32509	Inhibitors of Apoptosis	4.207e-30	51.39	XP_018571360.1	ribosomal protein S6 kinase 2 beta isoform X2	0	98
JPS_TRINITY_DN4616_c0_g1	954	0.575976	Inhibitors of Apoptosis	6.36809e-32	47.24	XP_018566818.1	cyclin-dependent-like kinase 5	0	100
JPS_TRINITY_DN5408_c0_g1	5178	0.805759	Inhibitors of Apoptosis	3.44442e-25	51.07	XP_018577381.1	serine/threonine-protein kinase Genghis Khan	0	99.36
JPS_TRINITY_DN3153_c0_g1	3240	0.692117	Inhibitors of Apoptosis	2.33791e-07	44.66	XP_018575394.1	mitotic checkpoint serine/threonine-protein kinase BUB1 beta	0	93.42
JPS_TRINITY_DN3360_c0_g1	456	0.131486	Inhibitors of Apoptosis	3.74153e-13	48.03	XP_018561366.1	ubiquitin-conjugating enzyme E2 N	5.96953e-109	100
JPS_TRINITY_DN4191_c0_g2	2226	0.0186798	Inhibitors of Apoptosis	5.2495e-32	54.12	JAB67059.1	cGMP-dependent protein kinase	0	99.46
JPS_TRINITY_DN574_c1_g1	2214	-0.615087	Inhibitors of Apoptosis	5.35739e-31	49.27	XP_018564589.1	serine/threonine-protein kinase tousled-like 2 isoform X7	0	99.19
JPS_TRINITY_DN7292_c0_g2	1383	0.854798	Inhibitors of Apoptosis	5.78716e-26	48.24	XP_018575230.1	serine/threonine-protein kinase grp	0	98.26
JPS_TRINITY_DN2094_c0_g1	1260	-0.854454	Inhibitors of Apoptosis	1.84662e-25	48.26	XP_018571562.1	protein kinase shaggy isoform X10	0	99.05
JPS_TRINITY_DN478_c0_g1	1056	-0.0373245	Inhibitors of Apoptosis	8.9939e-91	57.95	XP_018566786.1	death-associated inhibitor of apoptosis 2 isoform X2	0	88.86
JPS_TRINITY_DN4399_c0_g2	2691	1.67609	Inhibitors of Apoptosis	1.2419e-39	55.98	XP_018567263.1	SNF-related serine/threonine-protein kinase	0	94.72
JPS_TRINITY_DN6189_c0_g2	1710	0.0292758	Inhibitors of Apoptosis	3.77804e-36	53.75	XP_018561327.1	serine/threonine-protein kinase polo	0	97.72
JPS_TRINITY_DN6189_c0_g1	1710	0.0292758	Inhibitors of Apoptosis	3.77804e-36	53.75	XP_018561327.1	serine/threonine-protein kinase polo	0	97.72
JPS_TRINITY_DN23697_c0_g2	1401	-1.35529	Inhibitors of Apoptosis	3.60502e-35	52.4	XP_018580227.1	peripheral plasma membrane protein CASK	0	99.54
JPS_TRINITY_DN284_c0_g1	2424	0.864117	Inhibitors of Apoptosis	2.68984e-23	45.6	XP_018567724.1	obscurin isoform X8	0	98.4
JPS_TRINITY_DN4576_c0_g1	1209	0.44486	Inhibitors of Apoptosis	3.99106e-22	45.72	XP_018572893.1	cyclin-dependent kinase 9	0	100
JPS_TRINITY_DN22769_c0_g1	1608	-1.16086	Inhibitors of Apoptosis	5.14264e-19	45.56	XP_018565991.1	wee1-like protein kinase	0	98.5
JPS_TRINITY_DN5509_c0_g2	2436	1.49883	Inhibitors of Apoptosis	2.41535e-18	47.52	XP_018579098.1	serine/threonine-protein kinase PITSLRE	0	98.03
JPS_TRINITY_DN25152_c0_g3	1029	-0.431484	Inhibitors of Apoptosis	3.10384e-20	55.56	JAB63952.1	Tribbles protein	0	97.66
JPS_TRINITY_DN3183_c0_g1	2478	0.815227	Inhibitors of Apoptosis	2.48499e-09	45.52	XP_018562554.1	TBC domain-containing protein kinase-like protein	0	97.58
JPS_TRINITY_DN3003_c1_g1	510	0.356631	Inhibitors of Apoptosis	3.10712e-10	52.63	XP_018563104.1	ubiquitin-conjugating enzyme E2 G1 isoform X1	3.28144e-124	100
JPS_TRINITY_DN2314_c0_g1	1113	-0.794005	Inhibitors of Apoptosis	6.26757e-06	54.17	XP_018579299.1	cell growth regulator with RING finger domain protein 1	0	98.38
JPS_TRINITY_DN96969_c0_g1	1098	1.62455	Inhibitors of Apoptosis	3.33273e-44	57.79	XP_018565099.1	serine/threonine-protein kinase Aurora-2-like	0	91.51
JPS_TRINITY_DN5064_c0_g1	1584	0.64882	Inhibitors of Apoptosis	1.54493e-43	52.9	XP_018576901.1	5'-AMP-activated protein kinase catalytic subunit alpha-2	0	99.62
JPS_TRINITY_DN4204_c0_g1	1050	1.52958	Inhibitors of Apoptosis	1.33225e-36	54.66	XP_018567559.1	protein kinase DC2	0	98.85
JPS_TRINITY_DN120096_c0_g1	1194	0.441178	Inhibitors of Apoptosis	2.4722e-34	55.28	XP_023312990.1	testis-specific serine/threonine-protein kinase 3-like	0	95.31
JPS_TRINITY_DN3054_c0_g1	1734	0.104605	Inhibitors of Apoptosis	1.04188e-32	51.26	XP_018564518.1	serine/threonine-protein kinase GM11705 isoform X1	0	98.01
JPS_TRINITY_DN1202_c0_g1	1026	0.371302	Inhibitors of Apoptosis	1.60473e-32	58.62	XP_018563484.1	protein kinase C, brain isozyme isoform X2	0	99.71
JPS_TRINITY_DN1828_c0_g1	2466	1.07952	Inhibitors of Apoptosis	3.98075e-32	52.76	XP_018571436.1	serine/threonine-protein kinase PLK4	0	97.08
JPS_TRINITY_DN2030_c0_g1	957	0.304444	Inhibitors of Apoptosis	2.7148e-29	48.11	XP_018568189.1	cyclin-dependent kinase 1	0	97.48
JPS_TRINITY_DN5450_c0_g1	2112	-0.838533	Inhibitors of Apoptosis	5.75588e-29	57.37	XP_018574483.1	protein kinase C	0	99.86
JPS_TRINITY_DN2377_c0_g1	2691	-0.00576127	Inhibitors of Apoptosis	9.02803e-28	50.97	XP_018568408.1	serine/threonine-protein kinase Tao isoform X4	0	99.88
JPS_TRINITY_DN4930_c0_g1	948	1.89412	Inhibitors of Apoptosis	3.97868e-27	52.86	XP_018573634.1	cyclin-dependent kinase 2-like	0	98.1
JPS_TRINITY_DN6671_c0_g1	2982	-0.154461	Inhibitors of Apoptosis	5.34852e-27	48.99	XP_018567820.1	cGMP-dependent protein kinase, isozyme 1	0	98.39
JPS_TRINITY_DN1809_c0_g1	3831	-0.586852	Inhibitors of Apoptosis	2.44648e-26	49.24	XP_018562540.1	mitogen-activated protein kinase kinase kinase 15 isoform X3	0	98.81
JPS_TRINITY_DN5123_c0_g1	1494	1.25765	Inhibitors of Apoptosis	6.06358e-26	45.67	XP_018562858.1	mitogen-activated protein kinase 15	0	96.95
JPS_TRINITY_DN3166_c0_g1	1179	1.24216	Inhibitors of Apoptosis	9.45395e-26	46.26	XP_018576061.1	dual specificity mitogen-activated protein kinase kinase dSOR1	0	99.22
JPS_TRINITY_DN12912_c0_g1	1608	0.996193	Inhibitors of Apoptosis	6.34707e-25	48.85	XP_018580288.1	serine/threonine-protein kinase 26 isoform X2	0	99.63
JPS_TRINITY_DN5701_c0_g1	1785	0.50445	Inhibitors of Apoptosis	4.44173e-20	55.15	XP_018566586.1	serine/threonine-protein kinase greatwall	0	95.29
JPS_TRINITY_DN1981_c0_g1	1119	0.572998	Inhibitors of Apoptosis	1.97124e-18	44.72	XP_018579938.1	mitogen-activated protein kinase 1	0	99.73
JPS_TRINITY_DN31310_c0_g2	1839	-0.84702	Inhibitors of Apoptosis	1.22436e-17	50	XP_018570401.1	serine/threonine-protein kinase minibrain isoform X1	0	99.51
JPS_TRINITY_DN2994_c0_g1	648	1.07524	Inhibitors of Apoptosis	8.61364e-13	51.52	XP_018576028.1	serine/threonine-protein kinase STK11 isoform X1	3.35937e-132	100
JPS_TRINITY_DN3484_c0_g1	339	-1.01831	Inhibitors of Apoptosis	3.1205e-11	57.78	XP_023021388.1	serine/threonine-protein kinase SIK2-like	6.06429e-63	100
JPS_TRINITY_DN699_c0_g1	4653	0.577144	Inhibitors of Apoptosis	5.73043e-36	55.27	XP_018565729.1	microtubule-associated serine/threonine-protein kinase 3 isoform X1	0	98.04
JPS_TRINITY_DN37351_c0_g1	1875	-0.916611	Inhibitors of Apoptosis	9.20843e-34	52.55	JAB66329.1	cGMP-dependent protein kinase	0	95.51
JPS_TRINITY_DN280_c0_g1	1062	1.50365	Inhibitors of Apoptosis	1.70638e-28	52.36	XP_018578945.1	MAP kinase-activated protein kinase 2	0	100
JPS_TRINITY_DN7128_c0_g1	1002	-0.74332	Inhibitors of Apoptosis	2.95958e-21	49.44	XP_018571660.1	dual specificity mitogen-activated protein kinase kinase 3	0	98.5
JPS_TRINITY_DN5251_c0_g1	2244	1.36809	Inhibitors of Apoptosis	4.09516e-06	50.59	XP_018571017.1	ribosomal protein S6 kinase delta-1 isoform X1	0	93.99
JPS_TRINITY_DN13354_c0_g1	441	-2.59622	Inhibitors of Apoptosis	1.87729e-21	66	JAB64962.1	putative RNA-directed DNA polymerase from transposon BS	6.94469e-50	74.44
JPS_TRINITY_DN1803_c1_g2	411	-2.23965	Inhibitors of Apoptosis	4.63888e-21	64.58	RVE41474.1	hypothetical protein	5.96575e-48	73.88
JPS_TRINITY_DN6933_c0_g7	660	-2.762	Inhibitors of Apoptosis	5.23927e-21	64.29	JAB65013.1	putative RNA-directed DNA polymerase from transposon BS	2.15944e-65	66.67
JPS_TRINITY_DN53259_c0_g1	777	-2.21483	Inhibitors of Apoptosis	2.75414e-20	60.61	XP_037041566.1	uncharacterized protein LOC119078211	3.51749e-84	69.8
JPS_TRINITY_DN52888_c0_g1	606	-2.27667	Inhibitors of Apoptosis	6.62241e-20	61.86	VEN62577.1	unnamed protein product	1.24615e-50	67.91
JPS_TRINITY_DN11858_c0_g1	504	-2.88481	Inhibitors of Apoptosis	1.78824e-19	55.65	JAS89242.1	hypothetical protein, partial	1.42472e-40	65.58
JPS_TRINITY_DN7795_c0_g1	1110	-2.40519	Inhibitors of Apoptosis	1.93769e-19	57.02	JAV81920.1	hypothetical protein, partial	8.30762e-115	66.67
JPS_TRINITY_DN22084_c0_g2	531	-2.12308	Inhibitors of Apoptosis	1.944e-19	60.16	JAV56719.1	hypothetical protein, partial	5.66494e-42	64.07
JPS_TRINITY_DN17379_c0_g1	1569	-3.11764	Inhibitors of Apoptosis	5.04533e-19	62.24	PCG69367.1	hypothetical protein	1.3899e-138	63.06
JPS_TRINITY_DN16719_c0_g1	2823	-2.58856	Inhibitors of Apoptosis	1.02221e-18	63.89	JAV70703.1	hypothetical protein	0	58.7
JPS_TRINITY_DN822_c1_g1	1242	-2.08569	Inhibitors of Apoptosis	1.50968e-18	65	JAV95329.1	hypothetical protein, partial	1.64273e-120	66.1
JPS_TRINITY_DN5334_c0_g1	999	-2.82651	Inhibitors of Apoptosis	1.84843e-18	61.54	JAV81150.1	hypothetical protein	1.75644e-85	65.96
JPS_TRINITY_DN22440_c0_g1	855	-1.93271	Inhibitors of Apoptosis	2.71306e-18	63.92	JAB65788.1	putative RNA-directed DNA polymerase	6.36835e-103	73.94
JPS_TRINITY_DN18106_c1_g1	870	-2.56033	Inhibitors of Apoptosis	4.14413e-18	64.58	EFA13484.1	putative RNA-directed DNA polymerase from transposon BS-like Protein	4.05446e-98	70.21
JPS_TRINITY_DN1854_c5_g1	1752	-1.74891	Inhibitors of Apoptosis	4.35643e-18	67.35	JAB63683.1	putative RNA-directed DNA polymerase from transposon BS	4.2261e-161	66.33
JPS_TRINITY_DN37196_c0_g1	1104	-2.51858	Inhibitors of Apoptosis	4.86738e-18	64.89	JAB65788.1	putative RNA-directed DNA polymerase	3.87382e-91	62.57
JPS_TRINITY_DN23922_c0_g1	1239	-3.21061	Inhibitors of Apoptosis	4.9015e-18	62.63	JAB67036.1	putative RNA-directed DNA polymerase	6.14523e-103	68.24
JPS_TRINITY_DN9744_c0_g1	1161	-2.49636	Inhibitors of Apoptosis	5.01821e-18	61.62	JAV81150.1	hypothetical protein	3.09374e-88	62.01
JPS_TRINITY_DN14736_c1_g1	1569	-2.14282	Inhibitors of Apoptosis	7.03085e-18	58.12	JAV74993.1	hypothetical protein	2.73579e-131	62.25
JPS_TRINITY_DN27_c8_g1	2733	-1.28364	Inhibitors of Apoptosis	8.9285e-18	61.62	JAV94684.1	hypothetical protein, partial	0	66.24
JPS_TRINITY_DN28094_c0_g1	720	-2.81592	Inhibitors of Apoptosis	9.29064e-18	64.29	JAB65099.1	RNA-directed DNA polymerase from mobile element jockey	3.51143e-85	76.75
JPS_TRINITY_DN518_c0_g1	1476	-1.81412	Inhibitors of Apoptosis	9.96045e-18	58.62	JAV81920.1	hypothetical protein, partial	1.24052e-140	65.01
JPS_TRINITY_DN18079_c0_g1	2085	-2.43287	Inhibitors of Apoptosis	1.62097e-17	58.56	JAV78187.1	hypothetical protein	2.54893e-163	61.57
JPS_TRINITY_DN63843_c0_g1	1299	-1.09523	Inhibitors of Apoptosis	1.65704e-17	70.13	JAB65788.1	putative RNA-directed DNA polymerase	1.13504e-118	64.39
JPS_TRINITY_DN1076_c0_g1	576	-1.73763	Inhibitors of Apoptosis	2.1487e-17	57.39	VEN62577.1	unnamed protein product	2.30069e-62	69.15
JPS_TRINITY_DN13431_c0_g1	522	-1.68278	Inhibitors of Apoptosis	2.30656e-17	61.34	JAV70108.1	hypothetical protein	5.96534e-43	62.21
JPS_TRINITY_DN32446_c0_g1	2190	-2.63524	Inhibitors of Apoptosis	3.07577e-17	60.61	JAV98361.1	hypothetical protein	6.84467e-160	59.52
JPS_TRINITY_DN51866_c0_g1	606	-1.78631	Inhibitors of Apoptosis	3.25132e-17	63.92	KYB24594.1	hypothetical protein	9.09693e-47	71.28
JPS_TRINITY_DN3236_c0_g1	1569	-2.74467	Inhibitors of Apoptosis	5.36313e-17	58.62	VEN38354.1	unnamed protein product	6.9785e-123	61.52
JPS_TRINITY_DN5273_c0_g2	1521	-2.84186	Inhibitors of Apoptosis	6.47378e-17	60.82	VEN58210.1	unnamed protein product	7.51329e-122	64.21
JPS_TRINITY_DN24667_c0_g1	849	-1.46944	Inhibitors of Apoptosis	6.48533e-17	59.79	JAB65788.1	putative RNA-directed DNA polymerase	9.89633e-93	68.23
JPS_TRINITY_DN14772_c0_g1	759	-2.97793	Inhibitors of Apoptosis	7.52384e-17	56.25	JAV97610.1	hypothetical protein	1.28377e-71	65.46
JPS_TRINITY_DN78668_c0_g1	1089	-4.80331	Inhibitors of Apoptosis	7.59865e-17	62.89	VEN58210.1	unnamed protein product	1.59761e-107	68.16
JPS_TRINITY_DN19258_c0_g2	1062	-2.23264	Inhibitors of Apoptosis	9.13409e-17	58.82	JAT27990.1	hypothetical protein, partial	8.74072e-90	60.45
JPS_TRINITY_DN5733_c0_g2	654	-1.1365	Inhibitors of Apoptosis	9.99774e-17	61.86	JAB64092.1	putative RNA-directed DNA polymerase from transposon BS	4.35133e-107	87.04
JPS_TRINITY_DN11747_c0_g1	414	-2.43715	Inhibitors of Apoptosis	1.28601e-16	59	JAV95329.1	hypothetical protein, partial	1.00582e-44	74.62
JPS_TRINITY_DN73155_c0_g2	1104	-1.12584	Inhibitors of Apoptosis	1.52627e-16	65.59	PNF22171.1	hypothetical protein	7.41148e-86	58.67
JPS_TRINITY_DN17476_c0_g1	1452	-2.80402	Inhibitors of Apoptosis	1.52675e-16	58.04	JAV81920.1	hypothetical protein, partial	2.81122e-164	68.19
JPS_TRINITY_DN4056_c1_g1	708	-2.07796	Inhibitors of Apoptosis	1.88401e-16	59.26	JAV78261.1	hypothetical protein, partial	5.98426e-62	67.4
JPS_TRINITY_DN13451_c0_g2	789	-2.39413	Inhibitors of Apoptosis	2.23737e-16	53.78	JAB67279.1	putative RNA-directed DNA polymerase	2.03726e-51	77.78
JPS_TRINITY_DN10115_c0_g1	594	-1.94168	Inhibitors of Apoptosis	2.3445e-16	58.25	JAB65910.1	RNA-directed DNA polymerase	2.91535e-53	63.45
JPS_TRINITY_DN5933_c0_g1	1512	-2.79753	Inhibitors of Apoptosis	2.47476e-16	58.12	VEN44679.1	unnamed protein product	3.49668e-162	66.53
JPS_TRINITY_DN10819_c0_g1	1209	-2.28973	Inhibitors of Apoptosis	2.56461e-16	62.75	JAV95329.1	hypothetical protein, partial	7.22387e-85	63.72
JPS_TRINITY_DN36354_c0_g1	597	-1.90463	Inhibitors of Apoptosis	2.94128e-16	60.42	JAB67170.1	RNA-directed DNA polymerase	1.93921e-53	70.25
JPS_TRINITY_DN7117_c1_g1	699	-2.90439	Inhibitors of Apoptosis	3.07362e-16	60.61	JAT08333.1	hypothetical protein, partial	2.15994e-66	64.38
JPS_TRINITY_DN13623_c0_g3	2055	-2.02685	Inhibitors of Apoptosis	3.57631e-16	58.62	JAV98361.1	hypothetical protein	1.4876e-177	61.46
JPS_TRINITY_DN8699_c0_g1	1122	-2.93072	Inhibitors of Apoptosis	4.0494e-16	62.5	JAB63683.1	putative RNA-directed DNA polymerase from transposon BS	1.13255e-114	68.14
JPS_TRINITY_DN18068_c0_g3	615	-2.08599	Inhibitors of Apoptosis	4.31826e-16	55.88	JAB67036.1	putative RNA-directed DNA polymerase	4.5286e-86	86.29
JPS_TRINITY_DN19152_c0_g1	633	-3.19739	Inhibitors of Apoptosis	4.56642e-16	60.61	JAB65429.1	putative RNA-directed DNA polymerase	8.721e-84	76.44
JPS_TRINITY_DN15508_c0_g1	582	-1.67471	Inhibitors of Apoptosis	4.79416e-16	59.62	JAB65910.1	RNA-directed DNA polymerase	1.49526e-50	64.04
JPS_TRINITY_DN5080_c0_g1	2361	-2.20637	Inhibitors of Apoptosis	5.592e-16	64.95	XP_023025218.1	uncharacterized protein LOC111513268	0	62.5
JPS_TRINITY_DN8497_c0_g1	606	-2.12082	Inhibitors of Apoptosis	5.91054e-16	56.44	EFA11997.1	putative RNA-directed DNA polymerase from transposon X-element-like Protein	1.0806e-66	71.5
JPS_TRINITY_DN7112_c0_g1	426	-2.68625	Inhibitors of Apoptosis	6.50316e-16	62.24	VEN45873.1	unnamed protein product	8.62554e-27	65.74
JPS_TRINITY_DN22325_c0_g1	1008	-3.36252	Inhibitors of Apoptosis	6.76512e-16	59.6	JAB67632.1	putative RNA-directed DNA polymerase	8.20046e-89	74.42
JPS_TRINITY_DN31365_c0_g1	1467	-1.70695	Inhibitors of Apoptosis	6.83348e-16	57.89	JAV98361.1	hypothetical protein	1.9613e-172	69.98
JPS_TRINITY_DN8011_c0_g2	1815	-2.1649	Inhibitors of Apoptosis	7.82456e-16	59.79	JAV64203.1	hypothetical protein	0	66.89
JPS_TRINITY_DN7733_c0_g1	300	-1.10897	Inhibitors of Apoptosis	8.6759e-16	62.03	CAD7106670.1	unnamed protein product	3.79697e-27	76
JPS_TRINITY_DN12688_c0_g3	747	-2.6113	Inhibitors of Apoptosis	8.84079e-16	60.42	JAB65910.1	RNA-directed DNA polymerase	3.08855e-65	62.6
JPS_TRINITY_DN9784_c2_g1	1119	-2.00486	Inhibitors of Apoptosis	9.10824e-16	62.63	JAV77733.1	hypothetical protein, partial	3.01362e-84	62.97
JPS_TRINITY_DN37396_c0_g1	1707	-1.83986	Inhibitors of Apoptosis	1.11344e-15	63.16	PNF34201.1	hypothetical protein	2.99703e-130	59.04
JPS_TRINITY_DN12446_c0_g2	1191	-2.30108	Inhibitors of Apoptosis	1.25795e-15	61.29	PNF34201.1	hypothetical protein	1.73794e-92	60.93
JPS_TRINITY_DN6878_c0_g2	1350	-2.58844	Inhibitors of Apoptosis	1.38964e-15	62.24	EFA13482.1	putative RNA-directed DNA polymerase from transposon BS-like Protein	5.23502e-150	69.91
JPS_TRINITY_DN6181_c0_g2	2211	-2.36326	Inhibitors of Apoptosis	1.39078e-15	59.82	JAV74993.1	hypothetical protein	2.16669e-176	58.38
JPS_TRINITY_DN4399_c0_g3	1893	-2.90019	Inhibitors of Apoptosis	1.40126e-15	57.58	VEN35101.1	unnamed protein product	2.6746e-162	61.66
JPS_TRINITY_DN33561_c0_g1	1629	-2.68147	Inhibitors of Apoptosis	1.61609e-15	58.93	JAV54603.1	hypothetical protein	1.0749e-146	69.98
JPS_TRINITY_DN17857_c0_g1	1119	-2.34531	Inhibitors of Apoptosis	1.84107e-15	58	JAV61263.1	hypothetical protein	2.55266e-93	61.08
JPS_TRINITY_DN6786_c0_g1	1338	-1.56585	Inhibitors of Apoptosis	1.88836e-15	62.37	VEN43205.1	unnamed protein product, partial	3.1731e-150	71.3
JPS_TRINITY_DN11098_c0_g2	1044	-1.79536	Inhibitors of Apoptosis	1.91786e-15	59.8	JAV86812.1	hypothetical protein, partial	2.57988e-93	62.5
JPS_TRINITY_DN11501_c3_g1	465	-2.91726	Inhibitors of Apoptosis	1.98193e-15	58.47	JAV72384.1	hypothetical protein, partial	8.02272e-36	77.36
JPS_TRINITY_DN6857_c0_g1	300	-1.51952	Inhibitors of Apoptosis	2.02325e-15	59.55	JAB67170.1	RNA-directed DNA polymerase	1.02442e-24	68.04
JPS_TRINITY_DN23212_c0_g1	459	-2.39809	Inhibitors of Apoptosis	2.17466e-15	64.89	JAB64448.1	putative RNA-directed DNA polymerase from transposon X-element	2.05466e-34	72.73
JPS_TRINITY_DN55371_c0_g1	702	-2.64467	Inhibitors of Apoptosis	2.81047e-15	58.82	JAV95329.1	hypothetical protein, partial	2.82917e-75	69.53
JPS_TRINITY_DN13405_c0_g1	984	-1.82443	Inhibitors of Apoptosis	3.08242e-15	55	JAV81920.1	hypothetical protein, partial	9.88576e-93	69.05
JPS_TRINITY_DN12236_c0_g1	1995	-1.64182	Inhibitors of Apoptosis	3.2394e-15	57.89	PNF34820.1	hypothetical protein	1.84939e-111	55.21
JPS_TRINITY_DN20849_c0_g2	2787	-2.05735	Inhibitors of Apoptosis	3.44801e-15	54.76	VEN43205.1	unnamed protein product, partial	0	68.22
JPS_TRINITY_DN11159_c0_g1	2751	-2.02706	Inhibitors of Apoptosis	3.46677e-15	57.58	JAV80522.1	hypothetical protein	0	57.11
JPS_TRINITY_DN5332_c0_g1	783	-2.22599	Inhibitors of Apoptosis	4.5879e-15	57.41	JAT07920.1	hypothetical protein, partial	2.47562e-65	62.45
JPS_TRINITY_DN5515_c1_g2	315	-2.68885	Inhibitors of Apoptosis	4.72032e-15	65.33	EFA11997.1	putative RNA-directed DNA polymerase from transposon X-element-like Protein	9.04998e-31	82.14
JPS_TRINITY_DN19792_c0_g1	807	-2.085	Inhibitors of Apoptosis	5.58843e-15	58.76	JAB65788.1	putative RNA-directed DNA polymerase	3.95367e-84	67.18
JPS_TRINITY_DN22767_c0_g2	1446	-1.3563	Inhibitors of Apoptosis	6.07717e-15	57.76	JAB65788.1	putative RNA-directed DNA polymerase	4.38048e-116	65.43
JPS_TRINITY_DN8001_c0_g1	1464	-2.57682	Inhibitors of Apoptosis	6.2362e-15	53.78	JAV74993.1	hypothetical protein	7.01114e-129	63.77
JPS_TRINITY_DN14809_c0_g1	1245	-3.39314	Inhibitors of Apoptosis	6.80672e-15	61.73	EFA13480.1	putative RNA-directed DNA polymerase from transposon BS-like Protein	8.83306e-94	62.98
JPS_TRINITY_DN3762_c0_g3	1671	-2.17591	Inhibitors of Apoptosis	7.0107e-15	60.82	JAV95329.1	hypothetical protein, partial	4.8469e-171	67.79
JPS_TRINITY_DN9253_c1_g1	1107	-3.19483	Inhibitors of Apoptosis	7.12636e-15	54.46	PNF14081.1	hypothetical protein	2.52592e-81	56.15
JPS_TRINITY_DN4059_c0_g2	1341	-1.40419	Inhibitors of Apoptosis	7.28003e-15	62.24	EFA13480.1	putative RNA-directed DNA polymerase from transposon BS-like Protein	4.69197e-157	70.71
JPS_TRINITY_DN19465_c0_g2	762	-2.32836	Inhibitors of Apoptosis	7.92465e-15	61	JAV80255.1	hypothetical protein	5.30961e-66	64.57
JPS_TRINITY_DN20853_c0_g1	1473	-1.97728	Inhibitors of Apoptosis	8.84286e-15	60.55	VEN43205.1	unnamed protein product, partial	1.63042e-173	72.71
JPS_TRINITY_DN9178_c0_g1	1521	-2.93276	Inhibitors of Apoptosis	9.05815e-15	61.76	CAD7099654.1	unnamed protein product	1.17857e-106	57
JPS_TRINITY_DN46834_c0_g1	1740	0.173792	Inhibitors of Apoptosis	9.7867e-15	59	JAB65429.1	putative RNA-directed DNA polymerase	7.25899e-134	65.06
JPS_TRINITY_DN28243_c0_g1	1752	-1.74621	Inhibitors of Apoptosis	1.18094e-14	60.61	JAV74993.1	hypothetical protein	1.64536e-157	66.49
JPS_TRINITY_DN10513_c0_g1	864	-2.56636	Inhibitors of Apoptosis	1.24975e-14	55.26	JAB63683.1	putative RNA-directed DNA polymerase from transposon BS	9.48708e-117	78.44
JPS_TRINITY_DN10525_c0_g2	414	-3.08349	Inhibitors of Apoptosis	1.50072e-14	59.6	KAF2890298.1	hypothetical protein, partial	1.0898e-28	67.57
JPS_TRINITY_DN8345_c0_g1	1419	-4.09948	Inhibitors of Apoptosis	1.76943e-14	58.93	JAV80255.1	hypothetical protein	1.45018e-130	64.29
JPS_TRINITY_DN1163_c6_g1	744	-3.17057	Inhibitors of Apoptosis	1.82897e-14	62.34	JAB65099.1	RNA-directed DNA polymerase from mobile element jockey	1.19641e-81	70.68
JPS_TRINITY_DN49001_c0_g1	387	-2.38839	Inhibitors of Apoptosis	1.8843e-14	56.79	JAB61404.1	RNA-directed DNA polymerase from mobile element jockey	5.41375e-57	83.05
JPS_TRINITY_DN39004_c0_g1	2256	-2.72962	Inhibitors of Apoptosis	1.90057e-14	59.09	VEN43205.1	unnamed protein product, partial	0	67.12
JPS_TRINITY_DN33243_c0_g1	1020	-2.00401	Inhibitors of Apoptosis	1.96243e-14	55.97	JAB65099.1	RNA-directed DNA polymerase from mobile element jockey	2.55909e-95	69.16
JPS_TRINITY_DN36373_c0_g1	1047	-2.09704	Inhibitors of Apoptosis	2.20585e-14	65.06	EFA13480.1	putative RNA-directed DNA polymerase from transposon BS-like Protein	1.73569e-105	65.88
JPS_TRINITY_DN17607_c0_g1	1542	-2.37179	Inhibitors of Apoptosis	2.55435e-14	54.9	JAV83652.1	hypothetical protein, partial	3.68804e-169	70.95
JPS_TRINITY_DN11023_c0_g1	2118	-2.37814	Inhibitors of Apoptosis	2.797e-14	59.79	EFA13486.1	putative RNA-directed DNA polymerase from transposon BS-like Protein	1.94007e-180	61.82
JPS_TRINITY_DN13701_c0_g1	990	-1.45267	Inhibitors of Apoptosis	2.85251e-14	55.56	JAB65788.1	putative RNA-directed DNA polymerase	5.63964e-92	64.13
JPS_TRINITY_DN1803_c0_g1	1320	-1.31032	Inhibitors of Apoptosis	3.18878e-14	59.6	JAV64802.1	hypothetical protein	3.08022e-138	69.66
JPS_TRINITY_DN4469_c0_g2	1629	-2.06962	Inhibitors of Apoptosis	3.23088e-14	62	JAB65429.1	putative RNA-directed DNA polymerase	8.33542e-162	72.54
JPS_TRINITY_DN6302_c0_g1	1335	-2.55325	Inhibitors of Apoptosis	3.24153e-14	59.18	JAB65429.1	putative RNA-directed DNA polymerase	4.55317e-121	74.76
JPS_TRINITY_DN8149_c0_g2	1461	-1.43743	Inhibitors of Apoptosis	3.95857e-14	51.08	JAV98361.1	hypothetical protein	5.45499e-124	62
JPS_TRINITY_DN20012_c0_g1	1560	-3.22854	Inhibitors of Apoptosis	4.05937e-14	54.62	PCG63543.1	hypothetical protein	2.85111e-110	61.45
JPS_TRINITY_DN18108_c0_g1	2775	-1.86376	Inhibitors of Apoptosis	4.20292e-14	58.49	JAB65041.1	hypothetical protein, partial	0	84.54
JPS_TRINITY_DN52499_c0_g1	651	-2.38799	Inhibitors of Apoptosis	4.50496e-14	54.55	KXZ75890.1	hypothetical protein	1.57792e-54	69.23
JPS_TRINITY_DN14829_c0_g1	372	-3.42694	Inhibitors of Apoptosis	5.72651e-14	64.04	VEN45873.1	unnamed protein product	6.55654e-26	62.6
JPS_TRINITY_DN44996_c0_g1	1296	-1.60478	Inhibitors of Apoptosis	5.74135e-14	60	VEN38354.1	unnamed protein product	4.55471e-108	63.21
JPS_TRINITY_DN7445_c0_g1	1506	-1.88649	Inhibitors of Apoptosis	6.73121e-14	64.1	JAV64203.1	hypothetical protein	8.94474e-177	69.65
JPS_TRINITY_DN24361_c1_g1	1164	-2.33368	Inhibitors of Apoptosis	7.06745e-14	55.83	VEN43205.1	unnamed protein product, partial	5.56288e-121	69.57
JPS_TRINITY_DN22852_c0_g1	1650	-0.997059	Inhibitors of Apoptosis	9.16395e-14	59.41	JAB65429.1	putative RNA-directed DNA polymerase	1.20592e-143	66.53
JPS_TRINITY_DN7119_c0_g1	1104	-1.16843	Inhibitors of Apoptosis	9.47775e-14	66.67	XP_030747145.1	uncharacterized protein LOC115875782	6.04835e-93	62.75
JPS_TRINITY_DN12352_c1_g1	1014	-2.6555	Inhibitors of Apoptosis	9.53587e-14	58.65	JAV83652.1	hypothetical protein, partial	1.05459e-105	71.13
JPS_TRINITY_DN10776_c0_g1	1014	-3.40213	Inhibitors of Apoptosis	9.71022e-14	58.06	VEN59337.1	unnamed protein product	4.77986e-80	71.73
JPS_TRINITY_DN22051_c0_g2	1419	-1.22594	Inhibitors of Apoptosis	1.11247e-13	58.82	VEN43205.1	unnamed protein product, partial	3.03945e-145	72.09
JPS_TRINITY_DN21537_c0_g2	555	-2.00209	Inhibitors of Apoptosis	1.19908e-13	58.65	JAV51893.1	hypothetical protein, partial	1.75451e-45	65.36
JPS_TRINITY_DN19750_c0_g1	387	-2.68998	Inhibitors of Apoptosis	1.22196e-13	62.67	JAV53907.1	hypothetical protein, partial	3.11088e-40	69.17
JPS_TRINITY_DN7147_c0_g2	1962	-1.91282	Inhibitors of Apoptosis	1.24331e-13	58.33	VEN43205.1	unnamed protein product, partial	0	67.08
JPS_TRINITY_DN15794_c0_g1	1515	-1.29176	Inhibitors of Apoptosis	1.24538e-13	60.78	VEN43205.1	unnamed protein product, partial	2.20428e-175	72.15
JPS_TRINITY_DN13850_c0_g1	1284	-2.85489	Inhibitors of Apoptosis	1.257e-13	61.22	JAW08878.1	putative rna-directed dna polymerase from transposon bs	5.26929e-117	63.99
JPS_TRINITY_DN9065_c0_g1	330	-2.3696	Inhibitors of Apoptosis	1.27004e-13	60.24	JAB64962.1	putative RNA-directed DNA polymerase from transposon BS	1.63922e-34	73.27
JPS_TRINITY_DN9577_c0_g1	942	-2.24196	Inhibitors of Apoptosis	1.32962e-13	56.86	JAV86335.1	hypothetical protein, partial	9.83395e-95	69.33
JPS_TRINITY_DN25711_c0_g1	972	-3.76815	Inhibitors of Apoptosis	1.5019e-13	58.49	JAB61404.1	RNA-directed DNA polymerase from mobile element jockey	5.73766e-97	81.48
JPS_TRINITY_DN5545_c0_g1	384	-2.33899	Inhibitors of Apoptosis	1.56575e-13	62.35	JAB64975.1	putative RNA-directed DNA polymerase from transposon BS	1.92614e-40	70.87
JPS_TRINITY_DN57274_c0_g1	825	-3.18313	Inhibitors of Apoptosis	1.8749e-13	56.19	JAV64203.1	hypothetical protein	1.81164e-77	67.45
JPS_TRINITY_DN6213_c1_g1	465	-0.608835	Inhibitors of Apoptosis	1.94232e-13	53.72	JAV81920.1	hypothetical protein, partial	1.66453e-38	62.5
JPS_TRINITY_DN9527_c1_g1	1098	-2.94235	Inhibitors of Apoptosis	2.27799e-13	59.79	JAV80255.1	hypothetical protein	2.12479e-88	64.48
JPS_TRINITY_DN8624_c0_g1	681	-2.9289	Inhibitors of Apoptosis	2.46758e-13	60.76	JAB64423.1	putative RNA-directed DNA polymerase from transposon BS	6.79361e-60	66.83
JPS_TRINITY_DN5995_c0_g1	1191	-2.6183	Inhibitors of Apoptosis	2.87552e-13	58.82	PNF33440.1	hypothetical protein, partial	2.22223e-84	63.13
JPS_TRINITY_DN11675_c0_g1	1365	-2.19395	Inhibitors of Apoptosis	3.47783e-13	52.94	JAV83652.1	hypothetical protein, partial	7.69834e-150	67.4
JPS_TRINITY_DN25285_c0_g1	2019	-2.06485	Inhibitors of Apoptosis	4.13758e-13	63.44	VEN43205.1	unnamed protein product, partial	0	67.63
JPS_TRINITY_DN15907_c0_g1	1026	-0.930187	Inhibitors of Apoptosis	4.55927e-13	62.11	VEN43205.1	unnamed protein product, partial	2.2974e-99	70.92
JPS_TRINITY_DN17533_c0_g1	2367	-1.89229	Inhibitors of Apoptosis	4.87419e-13	58.56	JAB64092.1	putative RNA-directed DNA polymerase from transposon BS	0	65.43
JPS_TRINITY_DN76161_c0_g1	1164	-2.46883	Inhibitors of Apoptosis	4.97208e-13	57.01	VEN43205.1	unnamed protein product, partial	1.80631e-129	70.19
JPS_TRINITY_DN10098_c0_g1	1152	-2.55043	Inhibitors of Apoptosis	5.20647e-13	54	JAV80255.1	hypothetical protein	3.59669e-98	62.3
JPS_TRINITY_DN5758_c0_g1	2601	-2.4811	Inhibitors of Apoptosis	5.49915e-13	62.16	EFA13486.1	putative RNA-directed DNA polymerase from transposon BS-like Protein	0	63.35
JPS_TRINITY_DN14979_c0_g1	366	-3.20308	Inhibitors of Apoptosis	5.59454e-13	61.25	JAV66794.1	hypothetical protein, partial	4.00736e-29	68.1
JPS_TRINITY_DN18270_c0_g2	1791	-2.01681	Inhibitors of Apoptosis	5.99833e-13	54.78	JAV74993.1	hypothetical protein	0	67.56
JPS_TRINITY_DN4669_c1_g1	501	-2.25672	Inhibitors of Apoptosis	6.55749e-13	58.65	VEN45873.1	unnamed protein product	1.1105e-33	62.68
JPS_TRINITY_DN59749_c0_g1	384	-2.72779	Inhibitors of Apoptosis	7.16388e-13	65.22	JAB65098.1	RNA-directed DNA polymerase from mobile element jockey	2.71346e-41	73.77
JPS_TRINITY_DN8149_c2_g1	1875	-1.93828	Inhibitors of Apoptosis	9.5528e-13	56.57	VEN38354.1	unnamed protein product	1.00694e-177	64.72
JPS_TRINITY_DN8640_c0_g1	1530	-2.44244	Inhibitors of Apoptosis	1.03465e-12	60.42	JAV95063.1	hypothetical protein, partial	2.52024e-157	69.62
JPS_TRINITY_DN20946_c0_g1	531	-2.09437	Inhibitors of Apoptosis	1.03948e-12	57.14	JAV64203.1	hypothetical protein	1.74084e-48	70
JPS_TRINITY_DN19328_c0_g1	1476	-2.50273	Inhibitors of Apoptosis	1.19451e-12	58.59	EFA13486.1	putative RNA-directed DNA polymerase from transposon BS-like Protein	7.56878e-180	72.43
JPS_TRINITY_DN12361_c0_g1	1224	-2.32421	Inhibitors of Apoptosis	1.49994e-12	61.11	PNF22171.1	hypothetical protein	1.50772e-91	59.02
JPS_TRINITY_DN24589_c0_g1	1704	-2.47033	Inhibitors of Apoptosis	1.50444e-12	57.29	VEN43205.1	unnamed protein product, partial	0	71.61
JPS_TRINITY_DN14479_c1_g1	768	-2.31554	Inhibitors of Apoptosis	1.52526e-12	56.67	EFA13484.1	putative RNA-directed DNA polymerase from transposon BS-like Protein	9.45375e-85	73.52
JPS_TRINITY_DN539_c0_g5	546	-1.65408	Inhibitors of Apoptosis	1.62105e-12	59.3	JAB64717.1	putative RNA-directed DNA polymerase from transposon BS	4.0768e-42	65.17
JPS_TRINITY_DN97079_c0_g1	801	-0.855849	Inhibitors of Apoptosis	1.88937e-12	56.44	EFA13663.2	putative RNA-directed DNA polymerase from transposon X-element-like Protein	2.49336e-68	69.81
JPS_TRINITY_DN4852_c0_g1	555	-0.749799	Inhibitors of Apoptosis	2.05629e-12	59.78	KYB24829.1	putative RNA-directed DNA polymerase from transposon BS-like Protein	2.24959e-47	66.12
JPS_TRINITY_DN6448_c1_g3	714	-2.6291	Inhibitors of Apoptosis	2.78798e-12	51.35	JAV70108.1	hypothetical protein	1.38509e-56	61.67
JPS_TRINITY_DN61921_c0_g1	1374	-1.07715	Inhibitors of Apoptosis	3.59133e-12	55.1	JAB65788.1	putative RNA-directed DNA polymerase	2.75707e-122	66.9
JPS_TRINITY_DN14972_c1_g1	1074	-2.10078	Inhibitors of Apoptosis	3.80215e-12	65	JAB67036.1	putative RNA-directed DNA polymerase	1.84213e-128	73.82
JPS_TRINITY_DN49456_c0_g1	1137	-1.43832	Inhibitors of Apoptosis	4.41121e-12	58.25	JAV61263.1	hypothetical protein	9.32642e-99	61.68
JPS_TRINITY_DN6545_c0_g1	2697	-2.41607	Inhibitors of Apoptosis	4.60618e-12	56.3	JAB63107.1	putative RNA-directed DNA polymerase from transposon X-element	0	85.93
JPS_TRINITY_DN6545_c0_g3	2697	-2.79779	Inhibitors of Apoptosis	4.60618e-12	56.3	JAB63107.1	putative RNA-directed DNA polymerase from transposon X-element	0	85.93
JPS_TRINITY_DN141947_c0_g1	1110	-2.88323	Inhibitors of Apoptosis	5.06248e-12	56.99	JAB65098.1	RNA-directed DNA polymerase from mobile element jockey	0	93.75
JPS_TRINITY_DN5238_c0_g1	1476	-2.29896	Inhibitors of Apoptosis	5.18945e-12	62.03	JAV95329.1	hypothetical protein, partial	1.37673e-157	67.84
JPS_TRINITY_DN37404_c0_g1	738	-1.54492	Inhibitors of Apoptosis	5.44928e-12	63.01	JAV81150.1	hypothetical protein	3.14963e-64	70.39
JPS_TRINITY_DN13693_c0_g2	672	-3.93074	Inhibitors of Apoptosis	6.27949e-12	54.72	JAS88963.1	hypothetical protein, partial	9.69024e-44	62.77
JPS_TRINITY_DN9146_c0_g2	306	-0.626007	Inhibitors of Apoptosis	7.30715e-12	57.75	JAB65429.1	putative RNA-directed DNA polymerase	6.81088e-34	74.51
JPS_TRINITY_DN10141_c0_g1	792	-1.82613	Inhibitors of Apoptosis	8.58023e-12	55.95	MBY29336.1	putative RNA-directed DNA polymerase	7.05934e-63	68.2
JPS_TRINITY_DN19309_c0_g2	363	-2.6072	Inhibitors of Apoptosis	9.09525e-12	58.44	JAV80255.1	hypothetical protein	1.4352e-32	69.17
JPS_TRINITY_DN16933_c0_g1	495	-2.90019	Inhibitors of Apoptosis	1.42507e-11	45.77	JAB66259.1	putative RNA-directed DNA polymerase	5.66774e-67	73.94
JPS_TRINITY_DN16877_c0_g1	1410	-2.9157	Inhibitors of Apoptosis	1.43657e-11	60.22	VEN43205.1	unnamed protein product, partial	1.19119e-159	71.08
JPS_TRINITY_DN5358_c1_g2	2211	-3.2268	Inhibitors of Apoptosis	1.61241e-11	58.59	JAV75022.1	hypothetical protein	1.51431e-127	54.81
JPS_TRINITY_DN24966_c0_g1	1131	-0.324828	Inhibitors of Apoptosis	2.30188e-11	61.96	VEN43205.1	unnamed protein product, partial	4.52942e-111	69.23
JPS_TRINITY_DN10074_c0_g2	624	-4.06654	Inhibitors of Apoptosis	2.49448e-11	54.72	VEN44264.1	unnamed protein product	4.30986e-57	71.91
JPS_TRINITY_DN29894_c0_g1	2277	-2.10688	Inhibitors of Apoptosis	3.34415e-11	58.33	VEN43205.1	unnamed protein product, partial	0	66.67
JPS_TRINITY_DN37045_c0_g2	627	-1.72949	Inhibitors of Apoptosis	3.41242e-11	61.04	JAV53869.1	hypothetical protein, partial	6.53955e-56	68.23
JPS_TRINITY_DN961_c2_g2	354	-1.83263	Inhibitors of Apoptosis	3.52748e-11	56.96	JAB64962.1	putative RNA-directed DNA polymerase from transposon BS	4.95463e-36	70.87
JPS_TRINITY_DN10145_c0_g1	699	-2.28174	Inhibitors of Apoptosis	3.84164e-11	52.56	JAS56695.1	hypothetical protein, partial	1.36284e-48	58.3
JPS_TRINITY_DN431_c1_g1	1857	-1.63871	Inhibitors of Apoptosis	4.15108e-11	53.06	JAV80255.1	hypothetical protein	7.15712e-149	60.26
JPS_TRINITY_DN9413_c0_g1	726	-1.60951	Inhibitors of Apoptosis	5.64307e-11	61.04	XP_037041566.1	uncharacterized protein LOC119078211	9.62011e-68	67.73
JPS_TRINITY_DN33139_c0_g1	492	-2.68566	Inhibitors of Apoptosis	6.41859e-11	61.29	JAB66139.1	RNA-directed DNA polymerase	4.24992e-47	65.84
JPS_TRINITY_DN54342_c0_g1	840	-1.00386	Inhibitors of Apoptosis	6.9661e-11	53.33	JAV95063.1	hypothetical protein, partial	4.83851e-55	64.34
JPS_TRINITY_DN36326_c0_g1	330	-1.73788	Inhibitors of Apoptosis	7.686e-11	60.47	JAB64717.1	putative RNA-directed DNA polymerase from transposon BS	1.37316e-32	67.48
JPS_TRINITY_DN47384_c0_g1	561	-2.39402	Inhibitors of Apoptosis	9.14195e-11	53.09	JAB65910.1	RNA-directed DNA polymerase	9.41784e-58	71.51
JPS_TRINITY_DN18047_c1_g2	447	-3.10095	Inhibitors of Apoptosis	9.70628e-11	54.37	JAV78261.1	hypothetical protein, partial	1.42671e-33	63.51
JPS_TRINITY_DN24361_c0_g1	2289	-1.50652	Inhibitors of Apoptosis	9.72113e-11	56.99	VEN43205.1	unnamed protein product, partial	0	70.18
JPS_TRINITY_DN5733_c0_g3	504	-2.60511	Inhibitors of Apoptosis	1.09561e-10	53.66	JAV97610.1	hypothetical protein	3.75192e-48	68.29
JPS_TRINITY_DN6910_c0_g1	363	-2.47891	Inhibitors of Apoptosis	1.10946e-10	55.91	JAB65429.1	putative RNA-directed DNA polymerase	1.46897e-30	67.5
JPS_TRINITY_DN70278_c0_g1	1995	-2.67715	Inhibitors of Apoptosis	1.142e-10	56.86	JAV92490.1	hypothetical protein, partial	2.05614e-150	61.87
JPS_TRINITY_DN24158_c0_g2	321	-0.276356	Inhibitors of Apoptosis	2.05962e-10	52.53	MBY15462.1	RNA-directed DNA polymerase from mobile element jockey	2.26261e-24	66.32
JPS_TRINITY_DN2199_c0_g1	867	-2.08068	Inhibitors of Apoptosis	2.19596e-10	59.04	JAB64680.1	Retrotransposable element	4.5537e-44	69.4
JPS_TRINITY_DN14775_c0_g1	309	-2.78233	Inhibitors of Apoptosis	2.37579e-10	60.94	KAB0794201.1	hypothetical protein	1.00339e-17	77.78
JPS_TRINITY_DN26455_c0_g1	777	-2.01019	Inhibitors of Apoptosis	3.57043e-10	58.42	EFA13485.1	putative RNA-directed DNA polymerase from transposon BS-like Protein	1.62786e-61	63.53
JPS_TRINITY_DN109245_c0_g1	402	-1.40707	Inhibitors of Apoptosis	3.94221e-10	55.06	JAB65429.1	putative RNA-directed DNA polymerase	1.78717e-37	67.94
JPS_TRINITY_DN69363_c0_g1	363	-2.30546	Inhibitors of Apoptosis	4.26749e-10	55.41	JAB65910.1	RNA-directed DNA polymerase	2.40401e-35	71.9
JPS_TRINITY_DN10520_c0_g1	873	-2.43229	Inhibitors of Apoptosis	4.61104e-10	57.5	JAB64092.1	putative RNA-directed DNA polymerase from transposon BS	3.02103e-95	73.29
JPS_TRINITY_DN25682_c1_g1	996	-2.25688	Inhibitors of Apoptosis	5.77234e-10	64	JAB64717.1	putative RNA-directed DNA polymerase from transposon BS	1.20906e-94	85.87
JPS_TRINITY_DN11225_c0_g1	1704	-1.32846	Inhibitors of Apoptosis	5.98738e-10	56.25	PNF23079.1	hypothetical protein	1.44286e-122	61.22
JPS_TRINITY_DN8087_c0_g1	1260	-2.54985	Inhibitors of Apoptosis	7.42228e-10	53.45	PNF42349.1	hypothetical protein	1.82418e-100	61.47
JPS_TRINITY_DN10524_c0_g1	1032	-2.85868	Inhibitors of Apoptosis	1.00073e-09	63.54	JAB64423.1	putative RNA-directed DNA polymerase from transposon BS	5.17485e-91	75.59
JPS_TRINITY_DN23015_c0_g1	318	-1.2247	Inhibitors of Apoptosis	2.22047e-09	72.34	JAB63683.1	putative RNA-directed DNA polymerase from transposon BS	1.01771e-30	73.79
JPS_TRINITY_DN18047_c1_g1	420	-2.13834	Inhibitors of Apoptosis	2.96379e-09	60.94	JAV78261.1	hypothetical protein, partial	4.37609e-36	65
JPS_TRINITY_DN8964_c1_g1	312	-2.56147	Inhibitors of Apoptosis	4.05768e-09	72	JAB67170.1	RNA-directed DNA polymerase	2.9852e-20	68.29
JPS_TRINITY_DN19154_c0_g1	846	-3.29419	Inhibitors of Apoptosis	5.05479e-09	58.67	JAB64145.1	putative RNA-directed DNA polymerase from transposon BS	6.38646e-88	70.29
JPS_TRINITY_DN99312_c0_g1	636	-2.31456	Inhibitors of Apoptosis	5.17558e-09	55.56	JAB66371.1	RNA-directed DNA polymerase	1.20714e-68	77.91
JPS_TRINITY_DN6753_c0_g2	897	-2.09416	Inhibitors of Apoptosis	5.4746e-09	59.46	JAV61263.1	hypothetical protein	2.82727e-68	62.99
JPS_TRINITY_DN5628_c0_g2	507	-2.4457	Inhibitors of Apoptosis	1.01953e-08	61.02	XP_013193561.1	RNA-directed DNA polymerase from mobile element jockey-like isoform X1	1.82528e-43	72.78
JPS_TRINITY_DN10592_c0_g1	303	-3.04264	Inhibitors of Apoptosis	1.10411e-08	82.5	JAI52292.1	RNA-directed DNA polymerase from mobile element jockey	3.0763e-29	72.22
JPS_TRINITY_DN15913_c0_g2	1038	-1.9344	Inhibitors of Apoptosis	1.31751e-08	60.56	JAV80255.1	hypothetical protein	1.12886e-79	62.65
JPS_TRINITY_DN22814_c1_g1	390	-2.81697	Inhibitors of Apoptosis	1.35776e-08	72.09	JAV53096.1	hypothetical protein	1.40094e-21	62.28
JPS_TRINITY_DN10022_c0_g2	591	-3.08345	Inhibitors of Apoptosis	1.7861e-08	55.7	JAV92490.1	hypothetical protein, partial	1.17965e-44	63.45
JPS_TRINITY_DN25212_c0_g1	753	-2.28244	Inhibitors of Apoptosis	1.95646e-08	68.63	JAB64092.1	putative RNA-directed DNA polymerase from transposon BS	1.90101e-88	82.91
JPS_TRINITY_DN14249_c0_g1	1821	-3.29166	Inhibitors of Apoptosis	2.07096e-08	51.96	JAC14205.1	putative rna-directed dna polymerase from transposon x-element	9.8302e-164	64.01
JPS_TRINITY_DN22013_c0_g1	513	-2.48153	Inhibitors of Apoptosis	2.89623e-08	71.11	JAB67632.1	putative RNA-directed DNA polymerase	2.54337e-90	89.31
JPS_TRINITY_DN24915_c0_g1	312	-1.29548	Inhibitors of Apoptosis	3.25613e-08	62.07	JAB67283.1	hypothetical protein	3.15804e-28	74.36
JPS_TRINITY_DN27788_c0_g1	771	0.42394	Inhibitors of Apoptosis	4.39913e-08	55.22	VEN58210.1	unnamed protein product	4.35257e-64	68.8
JPS_TRINITY_DN12691_c0_g1	996	-2.62223	Inhibitors of Apoptosis	4.46854e-08	64.71	JAV95329.1	hypothetical protein, partial	2.15529e-90	63.83
JPS_TRINITY_DN17912_c0_g1	396	-1.87869	Inhibitors of Apoptosis	5.99884e-08	68.75	JAB65788.1	putative RNA-directed DNA polymerase	1.46349e-31	62.12
JPS_TRINITY_DN10403_c0_g1	1677	-2.16252	Inhibitors of Apoptosis	6.30193e-08	55.45	JAV95329.1	hypothetical protein, partial	2.15716e-160	62.54
JPS_TRINITY_DN6925_c0_g1	846	-2.94644	Inhibitors of Apoptosis	1.17938e-07	51.61	JAV61263.1	hypothetical protein	4.61617e-57	59.56
JPS_TRINITY_DN22384_c0_g1	600	-1.72517	Inhibitors of Apoptosis	1.25311e-07	61.02	JAV56719.1	hypothetical protein, partial	8.37296e-39	66.45
JPS_TRINITY_DN6493_c0_g1	918	-1.98717	Inhibitors of Apoptosis	1.44299e-07	50	MBC8969747.1	putative RNA-directed DNA polymerase from transposon X-element	4.49443e-44	55.56
JPS_TRINITY_DN16462_c0_g2	1068	-2.49817	Inhibitors of Apoptosis	2.05348e-07	58.67	JAV53205.1	hypothetical protein, partial	4.67707e-72	61.89
JPS_TRINITY_DN17498_c0_g1	492	-2.02774	Inhibitors of Apoptosis	2.14664e-07	60.98	JAV92490.1	hypothetical protein, partial	1.87978e-34	61.78
JPS_TRINITY_DN5466_c0_g1	999	-2.63219	Inhibitors of Apoptosis	2.29089e-07	73.58	JAB63683.1	putative RNA-directed DNA polymerase from transposon BS	2.97377e-77	63.51
JPS_TRINITY_DN18604_c0_g1	588	-2.60902	Inhibitors of Apoptosis	2.30181e-07	46.61	JAV62664.1	hypothetical protein	3.03479e-73	72.34
JPS_TRINITY_DN21256_c0_g2	573	-1.23854	Inhibitors of Apoptosis	2.54948e-07	55.29	JAB67308.1	RNA-directed DNA polymerase	3.59224e-73	76.34
JPS_TRINITY_DN11166_c0_g1	477	-1.71657	Inhibitors of Apoptosis	2.95808e-07	73.17	JAB63683.1	putative RNA-directed DNA polymerase from transposon BS	7.83455e-90	91.61
JPS_TRINITY_DN16462_c0_g1	1059	-2.29997	Inhibitors of Apoptosis	2.99124e-07	57.75	JAV80255.1	hypothetical protein	2.15125e-81	62.72
JPS_TRINITY_DN1947_c2_g1	753	-2.17297	Inhibitors of Apoptosis	4.22753e-07	73.81	RZC37033.1	hypothetical protein	2.55856e-60	67.01
JPS_TRINITY_DN2199_c0_g2	450	-3.88735	Inhibitors of Apoptosis	4.54884e-07	61.9	VEN44679.1	unnamed protein product	4.90759e-15	63.16
JPS_TRINITY_DN9822_c0_g1	483	-1.65312	Inhibitors of Apoptosis	4.75393e-07	76.19	JAB67308.1	RNA-directed DNA polymerase	1.44423e-53	76.43
JPS_TRINITY_DN30804_c0_g1	330	-2.79665	Inhibitors of Apoptosis	5.5756e-07	50.7	XP_023024033.1	uncharacterized protein LOC111512162, partial	6.9786e-17	56.12
JPS_TRINITY_DN14473_c0_g1	297	-1.90657	Inhibitors of Apoptosis	8.4718e-07	70.27	KAB0794201.1	hypothetical protein	5.353e-30	71.91
JPS_TRINITY_DN15741_c0_g2	342	-2.79902	Inhibitors of Apoptosis	1.00632e-06	56.6	JAB64145.1	putative RNA-directed DNA polymerase from transposon BS	1.44615e-22	65.59
JPS_TRINITY_DN26667_c0_g1	429	-2.34324	Inhibitors of Apoptosis	1.04076e-06	64.29	JAV53096.1	hypothetical protein	2.66492e-29	70.09
JPS_TRINITY_DN18796_c0_g2	858	-2.10903	Inhibitors of Apoptosis	1.45433e-06	68.75	JAV61263.1	hypothetical protein	7.23959e-67	59.79
JPS_TRINITY_DN30659_c0_g1	642	-3.1061	Inhibitors of Apoptosis	1.80386e-06	74.36	KAB0794201.1	hypothetical protein	4.33465e-49	65.08
JPS_TRINITY_DN13583_c0_g1	348	-3.92758	Inhibitors of Apoptosis	1.91232e-06	66.67	JAB64717.1	putative RNA-directed DNA polymerase from transposon BS	1.70092e-26	61.6
JPS_TRINITY_DN15243_c0_g1	315	-2.4168	Inhibitors of Apoptosis	3.72894e-06	58.93	JAB67036.1	putative RNA-directed DNA polymerase	3.01979e-12	74.14
JPS_TRINITY_DN75762_c0_g1	942	-1.54251	Inhibitors of Apoptosis	3.84607e-06	53.57	KXZ75869.1	hypothetical protein	7.34657e-73	63.18
JPS_TRINITY_DN22734_c0_g1	1125	-4.04058	Inhibitors of Apoptosis	4.83257e-06	52.05	KMQ86555.1	rna-directed dna polymerase from mobile element jockey-like protein	4.58508e-71	60.41
JPS_TRINITY_DN14221_c0_g3	345	-2.72966	Inhibitors of Apoptosis	5.22933e-06	65.22	JAV61263.1	hypothetical protein	2.75386e-15	63.54
JPS_TRINITY_DN10740_c0_g1	426	-1.52468	Inhibitors of Apoptosis	5.36086e-06	53.16	KYB24594.1	hypothetical protein	3.9463e-32	76.7
JPS_TRINITY_DN8645_c0_g1	321	-2.25013	Inhibitors of Apoptosis	5.74753e-06	69.23	JAB66259.1	putative RNA-directed DNA polymerase	5.32229e-25	68.09
JPS_TRINITY_DN9675_c0_g2	486	-0.588273	Inhibitors of Apoptosis	8.03366e-06	61.29	JAB65429.1	putative RNA-directed DNA polymerase	7.87361e-41	62.11
JPS_TRINITY_DN9277_c0_g2	906	-2.70649	Inhibitors of Apoptosis	8.22258e-06	70.73	JAB64145.1	putative RNA-directed DNA polymerase from transposon BS	6.1337e-85	69.96
JPS_TRINITY_DN3022_c0_g2	981	1.01946	Inhibitors of Apoptosis	3.87409e-12	57.69	XP_018574514.1	E3 ubiquitin-protein ligase RNF34	0	91.72
JPS_TRINITY_DN3331_c0_g1	1023	1.58448	Inhibitors of Apoptosis	2.72849e-06	62.75	XP_018573276.1	mitochondrial E3 ubiquitin protein ligase 1	0	98.24
JPS_TRINITY_DN108513_c0_g1	930	0.598261	Inhibitors of Apoptosis	4.60041e-37	57.26	XP_023310325.1	aurora kinase B-like	0	96.42
JPS_TRINITY_DN833_c0_g4	1062	-1.28033	Inhibitors of Apoptosis	2.31299e-34	57.37	XP_018565111.1	cAMP-dependent protein kinase catalytic subunit	0	100
JPS_TRINITY_DN1200_c0_g1	1086	1.78312	Inhibitors of Apoptosis	2.39175e-34	57.54	XP_018562306.1	cAMP-dependent protein kinase catalytic subunit-like	0	97.51
JPS_TRINITY_DN605_c0_g1	1548	-0.518702	Inhibitors of Apoptosis	3.55287e-27	45.05	XP_018569874.1	serine/threonine-protein kinase tricorner isoform X3	0	99.81
JPS_TRINITY_DN2753_c0_g1	3078	1.46127	Inhibitors of Apoptosis	1.77776e-26	49.5	XP_018576928.1	serine/threonine-protein kinase N isoform X2	0	97.96
JPS_TRINITY_DN3952_c0_g1	1425	1.17332	Inhibitors of Apoptosis	2.22546e-23	49.61	XP_018574845.1	3-phosphoinositide-dependent protein kinase 1 isoform X1	0	98.31
JPS_TRINITY_DN3562_c0_g1	1173	-1.61645	Inhibitors of Apoptosis	9.2179e-20	42.95	JAB64577.1	Stress-activated protein kinase JNK	0	100
JPS_TRINITY_DN924_c0_g2	507	1.37999	Inhibitors of Apoptosis	1.20714e-08	50.38	JAB66145.1	Kalirin, partial	8.32889e-106	96.43
JPS_TRINITY_DN36915_c0_g1	1998	-0.519923	Inhibitors of Apoptosis	8.22006e-07	46.34	XP_018580145.1	protein neuralized isoform X1	0	98.65
JPS_TRINITY_DN7810_c0_g1	456	0.059453	Inhibitors of Apoptosis	1.91075e-17	48.41	XP_017785722.1	ubiquitin-conjugating enzyme E2-17 kDa	1.96037e-111	100
JPS_TRINITY_DN9331_c0_g1	459	0.625908	Inhibitors of Apoptosis	5.10943e-13	52.5	XP_018570973.1	ubiquitin-conjugating enzyme E2 T-like	1.28749e-96	94.08
JPS_TRINITY_DN1271_c0_g1	561	0.0820368	Inhibitors of Apoptosis	1.35219e-07	51.69	XP_018576037.1	ubiquitin-conjugating enzyme E2-24 kDa	2.17879e-126	100
JPS_TRINITY_DN1121_c0_g1	894	0.941981	JAK/STAT Pathway Members	7.71716e-08	70.37	XP_018576121.1	LIM and SH3 domain protein F42H10.3	0	96.64
JPS_TRINITY_DN7464_c0_g1	1224	2.17958	JAK/STAT Pathway Members	8.87236e-11	67.27	XP_018571502.1	drebrin-like protein	0	96.07
JPS_TRINITY_DN24_c0_g3	1491	-0.129803	JAK/STAT Pathway Members	2.53804e-10	66.67	XP_018561639.1	abl interactor 2	0	99.6
JPS_TRINITY_DN1066_c0_g1	651	1.34144	JAK/STAT Pathway Members	4.08217e-10	58.97	JAB64763.1	Arf-GAP with SH3 domain, ANK repeat and PH domain-containing protein 1	2.64571e-113	99.54
JPS_TRINITY_DN3230_c0_g1	1623	2.59477	JAK/STAT Pathway Members	1.75603e-08	65.31	JAB64082.1	Src substrate cortactin	0	93.57
JPS_TRINITY_DN6471_c0_g1	2904	0.636859	JAK/STAT Pathway Members	1.10276e-08	56.94	JAB63321.1	Retrotransposable element	0	60.8
JPS_TRINITY_DN15517_c0_g2	336	-2.09814	JAK/STAT Pathway Members	1.10938e-08	60.29	JAB63167.1	putative RNA-directed DNA polymerase from transposon X-element	3.372e-58	90.18
JPS_TRINITY_DN22765_c0_g1	795	-3.23671	JAK/STAT Pathway Members	1.21331e-07	61.43	KAF2891323.1	hypothetical protein, partial	2.08889e-93	75.2
JPS_TRINITY_DN12533_c0_g1	537	-2.72139	JAK/STAT Pathway Members	4.09644e-07	57.35	JAV54049.1	hypothetical protein, partial	5.21391e-62	71.68
JPS_TRINITY_DN31845_c0_g2	1476	-1.97625	JAK/STAT Pathway Members	6.19445e-07	60.29	XP_030754483.1	uncharacterized protein LOC115881211	3.66006e-121	59.92
JPS_TRINITY_DN5950_c2_g1	396	-2.92578	JAK/STAT Pathway Members	4.69641e-06	56	KYB24594.1	hypothetical protein	9.17751e-39	70.73
JPS_TRINITY_DN84983_c0_g1	2004	-1.52314	JAK/STAT Pathway Members	3.57611e-30	50	XP_018576393.1	raf homolog serine/threonine-protein kinase phl	0	99.85
JPS_TRINITY_DN144341_c0_g1	549	-0.450859	JAK/STAT Pathway Members	4.90594e-10	48.08	XP_018562207.1	guanylate cyclase 32E	6.52323e-118	97.8
JPS_TRINITY_DN1289_c0_g1	636	-0.0164834	JAK/STAT Pathway Members	1.08762e-10	64.29	XP_018566379.1	protein enhancer of sevenless 2B	1.96404e-158	100
JPS_TRINITY_DN1915_c0_g1	804	0.682529	JAK/STAT Pathway Members	2.98755e-06	50	XP_018578272.1	adapter molecule Crk	0	99.63
JPS_TRINITY_DN13835_c0_g1	3636	0.959747	JAK/STAT Pathway Members	3.32032e-06	59.62	XP_023015072.1	intersectin-1 isoform X5	0	79.7
JPS_TRINITY_DN13013_c0_g1	948	0.799145	JAK/STAT Pathway Members	3.43249e-06	66.67	JAB62615.1	hypothetical protein	2.00511e-155	95.27
JPS_TRINITY_DN6960_c0_g1	891	1.98892	JAK/STAT Pathway Members	3.40702e-33	67.48	XP_018567401.1	replication stress response regulator SDE2	3.64325e-87	93.65
JPS_TRINITY_DN297_c0_g1	2433	0.174639	JAK/STAT Pathway Members	2.50479e-08	61.9	XP_023311617.1	uncharacterized protein LOC108911220	0	93.94
JPS_TRINITY_DN4519_c0_g1	1236	-0.305474	JAK/STAT Pathway Members	1.33799e-07	45.51	XP_028143125.1	cytoplasmic protein NCK1 isoform X1	0	97.32
JPS_TRINITY_DN3048_c0_g1	948	0.242681	JAK/STAT Pathway Members	7.87819e-10	47.76	JAB65072.1	Tyrosine-protein phosphatase Lar	0	99.03
JPS_TRINITY_DN16229_c0_g1	1212	0.964346	JAK/STAT Pathway Members	7.70693e-20	43.72	XP_023310766.1	ephrin type-A receptor 8-like	1.25889e-159	76.02
JPS_TRINITY_DN927_c0_g1	2877	-0.176902	JAK/STAT Pathway Members	9.54563e-11	48.03	XP_018576098.1	tyrosine-protein phosphatase 99A	0	98.64
JPS_TRINITY_DN2723_c2_g1	3372	0.239631	JAK/STAT Pathway Members	3.10235e-49	58.24	XP_018576957.1	activated CDC42 kinase 1	0	95.81
JPS_TRINITY_DN2587_c0_g1	3015	0.694938	JAK/STAT Pathway Members	5.22403e-48	53.23	XP_023312278.1	tyrosine-protein kinase PR2 isoform X1	0	99.2
JPS_TRINITY_DN6158_c0_g1	495	0.666036	JAK/STAT Pathway Members	1.73805e-42	64.67	XP_018576100.1	tyrosine-protein kinase shark isoform X2	1.21373e-113	98.17
JPS_TRINITY_DN8099_c0_g1	1992	-0.210027	JAK/STAT Pathway Members	2.02064e-08	47.52	XP_018564780.1	spermatogenesis-associated protein 13	0	98.78
JPS_TRINITY_DN1344_c0_g1	1833	1.11385	JAK/STAT Pathway Members	3.02256e-06	61.82	XP_018561929.1	NCK-interacting protein with SH3 domain isoform X2	0	98.2
JPS_TRINITY_DN84718_c0_g1	2352	1.04048	JAK/STAT Pathway Members	1.27304e-11	50.36	XP_018565419.1	hepatocyte growth factor-regulated tyrosine kinase substrate	0	93.66
JPS_TRINITY_DN3533_c0_g1	1413	0.511827	JAK/STAT Pathway Members	2.36158e-08	66.04	JAB65621.1	Protein kinase C and casein kinase	0	98.94
JPS_TRINITY_DN8190_c0_g1	1167	-0.0116981	JAK/STAT Pathway Members	4.19864e-33	54.01	XP_018568393.1	ephrin type-A receptor 4a-like	0	87.79
JPS_TRINITY_DN7701_c0_g1	1230	0.480576	JAK/STAT Pathway Members	7.33861e-32	52.67	XP_018564496.1	tyrosine-protein kinase CSK-like	4.85544e-150	71.39
JPS_TRINITY_DN16_c1_g1	1239	-0.669512	JAK/STAT Pathway Members	3.30232e-26	49.22	XP_018578037.1	dual specificity testis-specific protein kinase 2	0	97.56
JPS_TRINITY_DN2376_c0_g1	1431	1.59069	JAK/STAT Pathway Members	1.77152e-24	58.23	JAB64842.1	TOM1-like protein 2	0	96.32
JPS_TRINITY_DN7306_c0_g1	1056	0.224496	JAK/STAT Pathway Members	3.35594e-13	45.02	XP_018570420.1	STE20-related kinase adapter protein alpha isoform X1	0	97.15
JPS_TRINITY_DN18757_c0_g1	1233	-0.439595	JAK/STAT Pathway Members	1.59055e-07	52.56	XP_018578811.1	endophilin-A isoform X2	0	97.56
JPS_TRINITY_DN888_c0_g1	1866	-0.594921	JAK/STAT Pathway Members	3.37107e-06	59.02	XP_018567017.1	SH3 domain-containing kinase-binding protein 1	0	94.05
JPS_TRINITY_DN47102_c0_g1	897	-1.58623	MD2-Like Receptors	2.84952e-11	54.74	XP_018562830.1	uncharacterized protein LOC108904672	1.48346e-125	91.77
JPS_TRINITY_DN119502_c0_g1	759	3.99138	MD2-Like Receptors	9.71923e-08	84.85	XP_018560884.1	histidine-rich glycoprotein	7.62053e-11	100
JPS_TRINITY_DN4732_c0_g1	468	-1.50106	MD2-Like Receptors	8.56306e-08	48.11	XP_018560918.1	uncharacterized protein LOC108903284	2.5304e-94	92.9
JPS_TRINITY_DN6606_c0_g1	306	-2.14547	MD2-Like Receptors	1.8956e-09	45.74	XP_037049121.1	extensin-2-like	3.2776e-19	54.46
JPS_TRINITY_DN4037_c0_g1	1320	0.138659	MD2-Like Receptors	2.78523e-27	82.43	XP_018580183.1	beta-1,4-glucuronyltransferase 1 isoform X2	0	97.91
JPS_TRINITY_DN455_c0_g1	1773	-0.275002	MD2-Like Receptors	1.10053e-47	85.71	ANS71246.1	elongation factor 1 alpha	0	100
JPS_TRINITY_DN502_c0_g1	1902	0.864349	MD2-Like Receptors	5.15485e-08	46.72	XP_018578347.1	HBS1-like protein	0	94.97
JPS_TRINITY_DN469_c0_g1	1389	0.737656	MD2-Like Receptors	5.52542e-07	52.56	XP_018565677.1	elongation factor 1-alpha	0	99.33
JPS_TRINITY_DN12002_c0_g1	831	0.362771	MD2-Like Receptors	8.64551e-10	59.62	XP_018565663.1	integrator complex subunit 12	5.93597e-96	96.86
JPS_TRINITY_DN844_c0_g1	936	0.0336917	MD2-Like Receptors	1.16891e-36	65.52	JAB64192.1	Cytospin-A, partial	0	98.06
JPS_TRINITY_DN980_c0_g1	3399	0.160389	MD2-Like Receptors	7.86791e-11	64.56	XP_018578792.1	la-related protein 1B isoform X1	0	95.68
JPS_TRINITY_DN792_c0_g1	2940	0.792808	MD2-Like Receptors	2.43784e-25	62	XP_018572518.1	EH domain-binding protein 1 isoform X1	0	97.35
JPS_TRINITY_DN35657_c0_g3	690	0.272337	MD2-Like Receptors	3.21431e-09	61.84	XP_023309815.1	titin-like	8.98416e-100	95.81
JPS_TRINITY_DN550_c0_g2	489	0.0409387	MD2-Like Receptors	5.06788e-88	87.58	JAB66955.1	Smoothelin, partial	3.07443e-100	97.52
JPS_TRINITY_DN5587_c0_g1	417	0.678915	MD2-Like Receptors	8.50591e-64	88.24	XP_018570914.1	titin isoform X3	7.2959e-69	93.53
JPS_TRINITY_DN108085_c0_g1	450	-0.303896	MD2-Like Receptors	1.95886e-62	83.58	XP_018572438.1	protein NPC2 homolog	3.61139e-79	91.95
JPS_TRINITY_DN15573_c0_g1	732	0.0249086	MD2-Like Receptors	9.9536e-24	53.23	XP_018565135.1	uncharacterized protein LOC108906391	1.63265e-119	91.43
JPS_TRINITY_DN104_c0_g2	5262	-0.416609	MD2-Like Receptors	8.96088e-87	70.19	XP_023310534.1	titin	0	73.72
JPS_TRINITY_DN4374_c0_g1	471	-2.17568	MD2-Like Receptors	4.14638e-41	61.94	JAB65676.1	hypothetical protein	1.21975e-84	87.82
JPS_TRINITY_DN3748_c0_g1	474	-0.753155	MD2-Like Receptors	8.35837e-65	75	XP_018560916.1	ecdysteroid-regulated 16 kDa protein	3.14315e-102	95.54
JPS_TRINITY_DN9_c0_g4	1206	2.11619	Peptidoglycan Recognition Proteins	1.19048e-73	56.16	XP_018574112.1	peptidoglycan-recognition protein LF-like	0	77.87
JPS_TRINITY_DN9_c0_g2	1206	2.11619	Peptidoglycan Recognition Proteins	1.19048e-73	56.16	XP_018574112.1	peptidoglycan-recognition protein LF-like	0	77.87
JPS_TRINITY_DN2097_c0_g1	720	0.499815	Peptidoglycan Recognition Proteins	1.9157e-27	54.49	XP_018569210.1	peptidoglycan-recognition protein 2-like	1.31354e-111	80.08
JPS_TRINITY_DN9_c0_g1	936	0.596459	Peptidoglycan Recognition Proteins	3.35452e-50	60.99	XP_018575561.1	peptidoglycan-recognition protein SA-like isoform X2	1.95213e-143	79.23
JPS_TRINITY_DN9261_c0_g1	996	-0.282149	Peptidoglycan Recognition Proteins	9.31529e-74	62.63	XP_018575567.1	peptidoglycan-recognition protein LC-like	8.7938e-164	89.49
JPS_TRINITY_DN6484_c1_g1	585	-1.07776	Peptidoglycan Recognition Proteins	6.26445e-90	82.56	XP_018566157.1	peptidoglycan-recognition protein 2	1.72333e-131	93.75
JPS_TRINITY_DN12376_c0_g1	564	1.58821	Peptidoglycan Recognition Proteins	4.55041e-79	75.82	XP_018566548.1	peptidoglycan-recognition protein SC2	5.57337e-130	97.34
JPS_TRINITY_DN6549_c1_g2	657	2.39706	Peptidoglycan Recognition Proteins	6.91229e-72	70.56	JAB63053.1	Peptidoglycan-recognition protein 2	7.79513e-109	88.83
JPS_TRINITY_DN117208_c0_g1	333	0.555524	Prophenoioxidases	3.67387e-06	50.93	XP_018563273.1	UDP-glucuronosyltransferase 2B9-like	9.291e-55	89.19
JPS_TRINITY_DN36848_c0_g1	750	-1.15974	Prophenoioxidases	9.43639e-68	68.4	XP_018571797.1	uncharacterized protein LOC108911362	1.61215e-152	96.39
JPS_TRINITY_DN11303_c0_g1	4218	0.589038	Relish-like Proteins	4.25033e-08	52.17	XP_018566528.1	tonsoku-like protein	0	90.4
JPS_TRINITY_DN22488_c0_g1	1446	0.476039	Relish-like Proteins	1.5414e-07	51.85	XP_018561772.1	BRCA1-associated RING domain protein 1-like	0	89.46
JPS_TRINITY_DN11735_c0_g1	723	2.08173	Relish-like Proteins	2.14278e-07	50.94	XP_018573537.1	ankyrin repeat domain-containing protein 54	1.97805e-165	97.92
JPS_TRINITY_DN3442_c0_g1	3384	-0.389341	Relish-like Proteins	9.78698e-13	50.98	XP_018568398.1	rabankyrin-5	0	97.96
JPS_TRINITY_DN5647_c0_g1	6054	-0.169925	Relish-like Proteins	1.16734e-20	45.45	XP_018569762.1	uncharacterized protein LOC108909819	0	61.77
JPS_TRINITY_DN7437_c0_g1	6837	-0.895633	Relish-like Proteins	2.3783e-20	53.24	XP_018569762.1	uncharacterized protein LOC108909819	0	63.69
JPS_TRINITY_DN22873_c1_g5	4338	-0.0474945	Relish-like Proteins	7.78418e-20	50.48	XP_023311715.1	uncharacterized protein LOC108913550	0	71.96
JPS_TRINITY_DN3139_c0_g2	4182	0.825809	Relish-like Proteins	2.36773e-19	48.48	XP_023311846.1	uncharacterized protein LOC108905886	0	84.69
JPS_TRINITY_DN30109_c0_g1	3333	-1.10698	Relish-like Proteins	2.49427e-19	46.73	XP_018569833.2	uncharacterized protein LOC108909877	0	80.49
JPS_TRINITY_DN7182_c0_g1	2331	0.492932	Relish-like Proteins	5.15624e-19	48.88	XP_018569762.1	uncharacterized protein LOC108909819	1.05013e-172	58.49
JPS_TRINITY_DN9416_c0_g1	2583	0.89225	Relish-like Proteins	1.05538e-16	49.75	XP_018569142.1	uncharacterized protein LOC108909316	0	71.97
JPS_TRINITY_DN14323_c0_g1	6534	2.97838	Relish-like Proteins	2.44767e-16	48.54	XP_018569142.1	uncharacterized protein LOC108909316	0	73.62
JPS_TRINITY_DN11207_c0_g5	3708	-0.125881	Relish-like Proteins	2.15564e-15	46.42	XP_023312689.1	uncharacterized protein LOC108914600	0	73.49
JPS_TRINITY_DN11207_c0_g4	3756	#DIV/0!	Relish-like Proteins	2.1931e-15	46.42	XP_023312689.1	uncharacterized protein LOC108914600	0	73.49
JPS_TRINITY_DN14024_c0_g1	3543	0.994381	Relish-like Proteins	8.07697e-14	45.65	XP_023310915.1	uncharacterized protein LOC111691795	0	70.22
JPS_TRINITY_DN6994_c0_g1	4644	-0.457166	Relish-like Proteins	2.2795e-12	40.96	XP_018564626.1	ankyrin repeat domain-containing protein 50	0	98.84
JPS_TRINITY_DN5260_c0_g1	2982	0.472317	Relish-like Proteins	5.45524e-12	40.77	XP_018564896.1	E3 ubiquitin-protein ligase MIB2	0	99.4
JPS_TRINITY_DN10923_c0_g1	2043	-0.140185	Relish-like Proteins	5.15233e-11	44.04	XP_018573079.1	protein fem-1 homolog C	0	99.41
JPS_TRINITY_DN11374_c0_g1	1554	-0.956503	Relish-like Proteins	3.12075e-08	54.95	XP_023311285.1	uncharacterized protein LOC108909215	0	74.61
JPS_TRINITY_DN2141_c0_g2	1248	0.0306329	Relish-like Proteins	5.0628e-08	55.21	XP_023311285.1	uncharacterized protein LOC108909215	3.37542e-160	72.4
JPS_TRINITY_DN7259_c0_g1	825	-1.1475	Relish-like Proteins	5.86065e-07	51.02	XP_018574789.1	eye-specific diacylglycerol kinase isoform X3	0	98.88
JPS_TRINITY_DN23016_c0_g2	1149	0.0944521	Relish-like Proteins	6.33696e-27	53.97	XP_018578543.1	ankyrin repeat, PH and SEC7 domain containing protein secG-like	1.93499e-94	59.01
JPS_TRINITY_DN14857_c0_g1	3546	0.189146	Relish-like Proteins	4.93563e-20	50.4	XP_018574567.1	ankyrin-3-like	0	72.38
JPS_TRINITY_DN5647_c0_g2	4092	0.0582969	Relish-like Proteins	6.29544e-20	50.94	XP_023311846.1	uncharacterized protein LOC108905886	0	70.46
JPS_TRINITY_DN53948_c0_g2	1437	-0.236217	Relish-like Proteins	8.58343e-17	41.87	XP_023312082.1	uncharacterized protein LOC108914374	2.4069e-164	66.73
JPS_TRINITY_DN12607_c0_g2	3270	0.617216	Relish-like Proteins	1.06639e-16	51.35	XP_018569142.1	uncharacterized protein LOC108909316	2.09472e-177	57
JPS_TRINITY_DN4015_c1_g3	3624	2.15093	Relish-like Proteins	1.78348e-16	46.61	XP_018564508.1	uncharacterized protein LOC108905920	0	78.41
JPS_TRINITY_DN15344_c0_g1	3054	-1.61605	Relish-like Proteins	3.42689e-12	48.48	XP_018568997.2	uncharacterized protein LOC108909222	0	73.04
JPS_TRINITY_DN16131_c0_g1	510	0.542029	Relish-like Proteins	2.04443e-11	60.26	XP_018575410.1	ankyrin repeat domain-containing protein 39	3.8236e-105	89.82
JPS_TRINITY_DN5495_c0_g2	1566	0.964881	Relish-like Proteins	6.78561e-11	51.24	XP_023311285.1	uncharacterized protein LOC108909215	0	72.12
JPS_TRINITY_DN22759_c0_g4	4455	0.104697	Relish-like Proteins	3.61131e-10	41.8	XP_018574571.2	LOW QUALITY PROTEIN: uncharacterized protein LOC108913503	0	77.52
JPS_TRINITY_DN24075_c0_g2	1407	0.188836	Relish-like Proteins	7.52983e-08	50.47	XP_018575369.1	ankyrin repeat and SAM domain-containing protein 4B	0	98.93
JPS_TRINITY_DN5495_c1_g4	657	-0.835385	Relish-like Proteins	9.02025e-07	56.98	JAB62770.1	26S proteasome non-ATPase regulatory subunit 10	3.11359e-63	71.79
JPS_TRINITY_DN36016_c0_g1	1449	0.474526	Relish-like Proteins	3.2679e-06	49.47	XP_018564374.1	serine/threonine-protein phosphatase 6 regulatory ankyrin repeat subunit A	0	98.94
JPS_TRINITY_DN7071_c0_g1	549	-0.134162	Relish-like Proteins	1.84759e-14	50.53	XP_018572644.1	embryonic polarity protein dorsal-like isoform X3	1.21653e-106	92.31
JPS_TRINITY_DN54320_c0_g1	651	-1.87441	Scavenger Receptors Class A	2.41503e-31	51.13	XP_018563287.1	chymotrypsin-1	1.08962e-101	83.26
JPS_TRINITY_DN10951_c0_g1	771	-0.329232	Scavenger Receptors Class A	1.92675e-40	51.41	XP_018573076.1	trypsin beta	9.98202e-157	93.12
JPS_TRINITY_DN10146_c0_g1	774	-0.039535	Scavenger Receptors Class A	1.32038e-36	52.07	XP_023311632.1	trypsin-3	5.21313e-147	91.05
JPS_TRINITY_DN1078_c0_g1	780	-1.57568	Scavenger Receptors Class A	2.70012e-32	50.82	XP_018566111.1	trypsin	1.55978e-130	89.71
JPS_TRINITY_DN2117_c0_g1	819	-1.62071	Scavenger Receptors Class A	3.10724e-32	47.22	XP_018580363.1	trypsin-1	2.67308e-118	77.2
JPS_TRINITY_DN2256_c0_g1	762	-1.67129	Scavenger Receptors Class A	2.36677e-27	49.44	XP_018572007.1	trypsin-3 isoform X1	9.54729e-132	93.28
JPS_TRINITY_DN74_c0_g3	1590	-0.217613	Scavenger Receptors Class A	6.59914e-06	48.53	AVP71460.1	chitin deacetylase 2 isoform B precursor	0	100
JPS_TRINITY_DN2412_c0_g1	13977	-0.729564	Scavenger Receptors Class A	8.31902e-29	53.63	XP_018568095.1	low-density lipoprotein receptor-related protein 1	0	96.16
JPS_TRINITY_DN15807_c0_g1	843	-2.23425	Scavenger Receptors Class A	5.76268e-27	45.53	XP_023311584.1	brachyurin-like	3.90029e-173	92.91
JPS_TRINITY_DN1886_c0_g1	846	-1.42965	Scavenger Receptors Class A	2.21649e-22	50	JAB67859.1	Chymotrypsin, partial	3.76694e-151	90.68
JPS_TRINITY_DN6315_c0_g1	774	-1.69385	Scavenger Receptors Class A	1.20375e-16	45.99	XP_018569491.1	trypsin-7-like	4.00161e-102	81.67
JPS_TRINITY_DN36807_c0_g1	3036	-0.618413	Scavenger Receptors Class A	1.33739e-08	45.13	XP_018564323.1	protein smoothened	0	94.61
JPS_TRINITY_DN6668_c0_g1	777	-2.18435	Scavenger Receptors Class A	1.00284e-35	50.21	XP_018572006.1	trypsin-7-like	3.24464e-134	87.94
JPS_TRINITY_DN120870_c0_g1	714	-0.95926	Scavenger Receptors Class A	1.65636e-11	37.86	XP_018569398.1	protein obstructor-E	1.08274e-164	98.73
JPS_TRINITY_DN5333_c0_g1	771	-1.5484	Scavenger Receptors Class A	7.30643e-09	41.96	XP_018579209.1	protein obstructor-E-like	1.85065e-154	98.05
JPS_TRINITY_DN112_c0_g1	660	2.16471	Scavenger Receptors Class A	8.84321e-07	48.61	XP_018564003.1	probable endochitinase	1.08052e-89	76.92
JPS_TRINITY_DN32934_c0_g1	366	-0.587414	Scavenger Receptors Class A	2.34397e-08	67.35	XP_018563919.1	chymotrypsin-1-like	5.64015e-22	96
JPS_TRINITY_DN7402_c0_g1	1671	-1.5939	Scavenger Receptors Class A	2.82153e-19	53.38	XP_018561360.1	frizzled-2	0	98.38
JPS_TRINITY_DN3397_c0_g1	1848	-1.30009	Scavenger Receptors Class A	1.66732e-11	43.7	XP_018569237.1	frizzled-2	0	99.84
JPS_TRINITY_DN35842_c0_g1	855	-1.35781	Scavenger Receptors Class A	8.91866e-30	46.99	XP_023311581.1	transmembrane protease serine 9	6.7106e-134	79.51
JPS_TRINITY_DN2397_c0_g3	864	-2.82944	Scavenger Receptors Class A	1.31743e-24	44.14	XP_018570823.1	brachyurin-like	7.5132e-150	91.87
JPS_TRINITY_DN10206_c0_g1	690	-1.94281	Scavenger Receptors Class A	7.52932e-11	41.29	XP_018569407.1	protein obstructor-E	8.34498e-169	99.56
JPS_TRINITY_DN6515_c0_g1	804	-1.51846	Scavenger Receptors Class A	1.27625e-09	41	XP_018571556.1	protein obstructor-E isoform X2	0	98.5
JPS_TRINITY_DN3209_c0_g1	1761	1.42872	Scavenger Receptors Class A	1.45007e-31	60.98	XP_018569285.1	protein javelin	0	90.73
JPS_TRINITY_DN4091_c0_g1	816	-2.82636	Scavenger Receptors Class A	5.0365e-27	48.48	XP_018580340.1	trypsin-1-like	2.68766e-143	87.64
JPS_TRINITY_DN5819_c0_g1	1113	1.34749	Scavenger Receptors Class A	1.45507e-09	56.45	XP_023310488.1	uncharacterized protein LOC111691613	3.04469e-33	65
JPS_TRINITY_DN3776_c0_g1	825	-2.06393	Scavenger Receptors Class A	5.33722e-29	49.21	XP_018580338.1	trypsin-1	3.1969e-149	88.24
JPS_TRINITY_DN824_c1_g1	657	0.485436	Scavenger Receptors Class A	9.15085e-17	53.33	JAB63610.1	putative chitinase 3	1.63699e-79	77.68
JPS_TRINITY_DN7231_c0_g1	795	-1.56333	Scavenger Receptors Class A	6.47967e-15	37.09	XP_018570214.1	protein obstructor-E-like	5.82619e-158	95.45
JPS_TRINITY_DN73747_c0_g1	690	-1.92985	Scavenger Receptors Class A	1.37475e-14	41.56	XP_018569404.1	protein obstructor-E-like	1.9747e-159	96.93
JPS_TRINITY_DN8813_c0_g3	801	-0.630816	Scavenger Receptors Class A	4.48469e-13	39.11	XP_018563920.1	uncharacterized protein LOC108905520	1.13611e-83	78.19
JPS_TRINITY_DN1124_c0_g1	801	-0.0597185	Scavenger Receptors Class A	4.23785e-11	38.64	XP_018563920.1	uncharacterized protein LOC108905520	1.71853e-113	78.18
JPS_TRINITY_DN1515_c0_g3	807	0.634925	Scavenger Receptors Class A	1.26661e-10	39.04	XP_023310091.1	peritrophin-1	6.28315e-122	86.4
JPS_TRINITY_DN1231_c0_g2	546	1.9214	Scavenger Receptors Class A	8.75025e-10	65.91	JAB63491.1	putative chitinase 3	6.86537e-42	86.9
JPS_TRINITY_DN567_c0_g1	8724	1.90863	Scavenger Receptors Class A	1.11378e-09	43.45	BAG13448.1	chitinase	0	99.45
JPS_TRINITY_DN6877_c1_g1	825	-1.252	Scavenger Receptors Class A	1.61992e-09	35.88	XP_018569399.1	protein obstructor-E	1.22641e-177	93.73
JPS_TRINITY_DN6425_c0_g2	300	1.09969	Scavenger Receptors Class A	1.2044e-08	61.11	XP_023309894.1	uncharacterized protein LOC108914575	1.3559e-23	86.21
JPS_TRINITY_DN824_c0_g1	300	1.01931	Scavenger Receptors Class A	1.04705e-07	67.5	JAB63610.1	putative chitinase 3	9.34581e-29	98.11
JPS_TRINITY_DN3249_c0_g3	798	0.395653	Scavenger Receptors Class A	1.12237e-07	62	JAB63490.1	hypothetical protein	2.77701e-39	81.13
JPS_TRINITY_DN3249_c0_g1	597	1.39078	Scavenger Receptors Class A	2.90119e-07	66.67	JAB63492.1	Small proline-rich protein 3	1.77722e-28	75.9
JPS_TRINITY_DN964_c0_g1	1809	-0.707025	Scavenger Receptors Class A	4.98676e-07	52.54	XP_018569329.1	uncharacterized protein LOC108909440 isoform X5	0	98.31
JPS_TRINITY_DN4891_c0_g1	4182	2.25161	Scavenger Receptors Class A	3.0394e-06	45.16	XP_018575593.1	protein PFC0760c-like	4.84903e-121	53.54
JPS_TRINITY_DN736_c0_g1	822	-2.24129	Scavenger Receptors Class A	3.55662e-33	51.25	JAB63180.1	Trypsin-7, partial	3.46903e-140	89.69
JPS_TRINITY_DN1515_c0_g2	1035	3.73313	Scavenger Receptors Class A	2.52982e-12	50	XP_023310095.1	probable chitinase 10	5.71881e-160	82.27
JPS_TRINITY_DN1515_c0_g1	840	2.61509	Scavenger Receptors Class A	1.16711e-08	42.66	JAB65872.1	putative chitinase	6.52376e-114	77.19
JPS_TRINITY_DN3880_c0_g1	897	-2.57684	Scavenger Receptors Class A	5.00858e-63	58.3	XP_018572875.1	trypsin-like	0	98.97
JPS_TRINITY_DN144152_c0_g1	600	-2.7649	Scavenger Receptors Class A	3.49947e-36	56.59	XP_018580028.1	trypsin-7-like	4.15275e-128	94
JPS_TRINITY_DN13371_c0_g2	1479	-1.63561	Scavenger Receptors Class A	3.38131e-12	53.54	XP_018574966.1	frizzled-4	0	99.59
JPS_TRINITY_DN3707_c0_g1	6393	0.44108	Scavenger Receptors Class A	5.56136e-31	50.82	XP_018570394.1	sortilin-related receptor	0	93.34
JPS_TRINITY_DN4266_c0_g1	5334	-4.62341	Scavenger Receptors Class A	8.19117e-31	46	ANW09597.1	vitellogenin 2	0	99.89
JPS_TRINITY_DN47472_c0_g1	339	-0.254072	Scavenger Receptors Class A	3.34679e-23	58.51	XP_023025335.1	basement membrane-specific heparan sulfate proteoglycan core protein-like	1.55962e-36	72.57
JPS_TRINITY_DN824_c0_g2	546	0.971315	Scavenger Receptors Class A	1.6271e-10	40.24	XP_023309894.1	uncharacterized protein LOC108914575	4.58032e-62	78.41
JPS_TRINITY_DN594_c1_g1	405	-0.572073	Scavenger Receptors Class A	1.16975e-09	52.46	XP_018575811.2	chondroitin proteoglycan 1	8.82158e-78	93.28
JPS_TRINITY_DN2619_c0_g1	300	-2.04876	Scavenger Receptors Class A	4.14525e-08	50	XP_018575826.1	peritrophin-1	6.994e-43	89.41
JPS_TRINITY_DN3301_c0_g1	312	-1.91726	Scavenger Receptors Class A	3.75333e-06	52.83	XP_018575900.1	uncharacterized protein LOC108914550	3.6593e-40	83.13
JPS_TRINITY_DN1511_c0_g1	1626	4.53761	Scavenger Receptors Class A	6.25033e-06	58.49	XP_018569128.1	endochitinase	0	98.52
JPS_TRINITY_DN736_c0_g2	771	-1.28034	Scavenger Receptors Class A	1.36316e-37	50.21	XP_018580036.1	trypsin delta	2.5771e-131	82.81
JPS_TRINITY_DN9130_c0_g1	804	0.960607	Scavenger Receptors Class A	4.71311e-34	49.79	XP_023015289.1	trypsin-7-like isoform X1	3.8139e-68	66.81
JPS_TRINITY_DN12614_c0_g1	2358	-2.13339	Scavenger Receptors Class A	7.51995e-50	42.55	XP_018562305.1	atrial natriuretic peptide-converting enzyme	0	97.96
JPS_TRINITY_DN6310_c0_g1	807	-3.51157	Scavenger Receptors Class A	8.35865e-41	53.28	JAB64010.1	Trypsin-7, partial	4.52865e-122	79.17
JPS_TRINITY_DN62362_c0_g1	1425	0.415189	Scavenger Receptors Class A	5.00019e-38	52.59	XP_018571760.1	plasminogen	0	98.11
JPS_TRINITY_DN170_c0_g1	2607	-0.339073	Scavenger Receptors Class A	2.17738e-26	49.79	XP_018566692.1	very low-density lipoprotein receptor	0	95.08
JPS_TRINITY_DN40497_c0_g1	1554	-0.165419	Scavenger Receptors Class A	9.80868e-26	48.95	XP_018561936.1	uncharacterized protein LOC108904045	0	94.58
JPS_TRINITY_DN13297_c0_g1	6138	-0.549413	Scavenger Receptors Class A	6.4768e-24	43.86	XP_018579890.1	low-density lipoprotein receptor-related protein 4	0	97.02
JPS_TRINITY_DN12117_c0_g1	318	-0.398327	Scavenger Receptors Class A	2.5086e-17	57.84	XP_015835387.1	basement membrane-specific heparan sulfate proteoglycan core protein isoform X18	1.98518e-26	65.45
JPS_TRINITY_DN349_c1_g1	1200	0.261071	Scavenger Receptors Class A	4.92024e-11	60	XP_018565958.1	low-density lipoprotein receptor class A domain-containing protein 3-like	0	95
JPS_TRINITY_DN130386_c0_g1	1602	-0.348998	Scavenger Receptors Class A	7.3349e-06	69.7	XP_018562469.1	uncharacterized protein LOC108904406	0	99.62
JPS_TRINITY_DN26465_c0_g1	1599	-1.84349	Scavenger Receptors Class A	2.30454e-15	56.44	XP_018570330.1	frizzled-4	0	98.12
JPS_TRINITY_DN4061_c0_g1	13851	-0.200303	Scavenger Receptors Class A	6.19084e-35	50.67	XP_018573935.1	low-density lipoprotein receptor-related protein 2	0	98.35
JPS_TRINITY_DN3339_c0_g1	4791	-0.700802	Scavenger Receptors Class A	3.31184e-16	53.45	XP_018572625.1	low-density lipoprotein receptor-related protein 6 isoform X1	0	99.62
JPS_TRINITY_DN3311_c2_g1	1428	0.320844	Scavenger Receptors Class A	1.96303e-10	45.39	VEN45177.1	unnamed protein product	9.7683e-97	64.08
JPS_TRINITY_DN132_c0_g1	474	0.598382	Scavenger Receptors Class B	1.80243e-40	76.15	AIX97076.1	sensory neuron membrane protein 1	1.51315e-76	100
JPS_TRINITY_DN5420_c0_g2	384	1.74835	Serine Protease Inhibitors	9.98649e-27	63.71	XP_018579754.1	serine protease inhibitor 3/4 isoform X7	6.15638e-45	79.84
JPS_TRINITY_DN25298_c0_g1	1038	-0.425836	Serine Protease Inhibitors	4.24105e-35	52.61	XP_018567618.1	zinc transporter ZIP1	0	89.31
JPS_TRINITY_DN2625_c0_g3	1152	-0.680323	Serine Protease Inhibitors	3.44313e-14	52.63	XP_018567627.1	zinc transporter ZIP1	0	96.08
JPS_TRINITY_DN5420_c0_g3	372	0.282344	Serine Protease Inhibitors	1.34202e-28	64.17	XP_018579755.1	serine protease inhibitor 3/4 isoform X8	9.52625e-41	75.81
JPS_TRINITY_DN3786_c0_g1	3102	2.89915	Serine Protease Inhibitors	1.36836e-41	52.26	XP_018579733.1	inter-alpha-trypsin inhibitor heavy chain H3-like isoform X1	0	84.41
JPS_TRINITY_DN501_c0_g1	1401	2.45336	Serine Protease Inhibitors	4.1159e-20	41.38	XP_018563620.1	serpin B6-like	0	93.56
JPS_TRINITY_DN226_c0_g3	1128	1.37645	Serine Protease Inhibitors	8.50809e-100	68.53	XP_023311466.1	uncharacterized protein LOC108907184	0	86.74
JPS_TRINITY_DN5584_c0_g1	414	1.10852	Serine Protease Inhibitors	1.2203e-29	67.15	XP_018566251.1	antichymotrypsin-2-like	8.46185e-45	80.74
JPS_TRINITY_DN7069_c0_g1	828	2.32648	Serine Protease Inhibitors	4.4337e-79	73.85	XP_018579762.1	serine protease inhibitor 3/4 isoform X14	5.88086e-116	84.98
JPS_TRINITY_DN5857_c0_g2	696	1.89045	Serine Protease Inhibitors	3.34822e-77	72.84	XP_018579762.1	serine protease inhibitor 3/4 isoform X14	5.51396e-120	89.66
JPS_TRINITY_DN6060_c0_g1	579	1.09448	Serine Protease Inhibitors	3.09491e-56	68.57	XP_018579762.1	serine protease inhibitor 3/4 isoform X14	9.48169e-83	85.25
JPS_TRINITY_DN15061_c0_g1	1137	0.562268	Serine Protease Inhibitors	1.16184e-46	56.71	XP_023312024.1	inter-alpha-trypsin inhibitor heavy chain H3-like isoform X2	8.05567e-161	80.58
JPS_TRINITY_DN5857_c0_g1	420	2.51313	Serine Protease Inhibitors	1.11588e-45	71.43	JAB63616.1	Serine protease inhibitor 3/4	8.69934e-82	91.43
JPS_TRINITY_DN5420_c0_g1	525	-0.861498	Serine Protease Inhibitors	2.46563e-45	74.86	XP_018579758.1	serine protease inhibitor 3/4 isoform X12	3.93966e-75	83.82
JPS_TRINITY_DN18_c0_g1	3150	1.52894	Serine Protease Inhibitors	1.07664e-43	56.84	XP_023312020.1	inter-alpha-trypsin inhibitor heavy chain H3-like isoform X1	0	81.86
JPS_TRINITY_DN6060_c0_g2	399	-0.384795	Serine Protease Inhibitors	8.15971e-36	71.43	XP_018579762.1	serine protease inhibitor 3/4 isoform X14	5.50254e-53	89.47
JPS_TRINITY_DN7449_c0_g1	636	1.22855	Serine Protease Inhibitors	3.84696e-29	54.34	XP_018575188.1	serpin B5-like	2.69777e-87	73.46
JPS_TRINITY_DN35923_c0_g2	510	0.916691	Serine Protease Inhibitors	5.75382e-28	61.04	XP_023312024.1	inter-alpha-trypsin inhibitor heavy chain H3-like isoform X2	7.89212e-56	77.18
JPS_TRINITY_DN35923_c0_g1	690	1.62158	Serine Protease Inhibitors	5.93348e-22	61.97	XP_018575274.1	inter-alpha-trypsin inhibitor heavy chain H3-like isoform X4	1.10394e-85	77.88
JPS_TRINITY_DN67170_c0_g1	2280	1.37333	Serine Protease Inhibitors	4.40275e-96	79.82	XP_023312575.1	location of vulva defective 1-like	0	91.57
JPS_TRINITY_DN11135_c0_g1	1182	1.4223	Serine Protease Inhibitors	1.15059e-91	61.58	XP_023311466.1	uncharacterized protein LOC108907184	4.7858e-169	80.46
JPS_TRINITY_DN1303_c0_g2	1176	0.696974	Serine Protease Inhibitors	8.35121e-74	57.8	XP_018570057.1	leukocyte elastase inhibitor-like isoform X3	0	86.01
JPS_TRINITY_DN14138_c0_g1	3507	1.05055	Serine Protease Inhibitors	6.19303e-37	53.97	XP_018570328.1	inter-alpha-trypsin inhibitor heavy chain H3	0	73.85
JPS_TRINITY_DN1889_c0_g1	3291	0.0712305	Small RNA Regulatory Pathway Members	9.99979e-45	46.7	XP_023311421.1	regulator of nonsense transcripts 1 homolog	0	99.82
JPS_TRINITY_DN4886_c0_g1	3630	0.7821	Small RNA Regulatory Pathway Members	8.18848e-69	49.74	XP_018563364.1	pre-mRNA-splicing factor ATP-dependent RNA helicase PRP16	0	98.43
JPS_TRINITY_DN6247_c0_g1	4176	1.27861	Small RNA Regulatory Pathway Members	9.71451e-14	48.22	XP_018562877.1	Fanconi anemia group M protein isoform X1	0	82.8
JPS_TRINITY_DN9880_c0_g1	3456	0.387495	Small RNA Regulatory Pathway Members	2.72388e-55	50	XP_018562024.1	probable ATP-dependent RNA helicase kurz	0	94.31
JPS_TRINITY_DN4449_c0_g1	4368	0.596665	Small RNA Regulatory Pathway Members	8.86133e-48	48.31	XP_018579554.1	probable helicase with zinc finger domain	0	99.18
JPS_TRINITY_DN1649_c0_g1	7020	-0.0298669	Small RNA Regulatory Pathway Members	7.90765e-13	54.78	XP_018571229.1	maternal protein tudor isoform X1	0	91.39
JPS_TRINITY_DN1652_c0_g2	2817	0.701779	Small RNA Regulatory Pathway Members	8.01746e-85	52.5	XP_023310830.1	ATP-dependent RNA helicase DHX36	0	89.48
JPS_TRINITY_DN16726_c0_g3	3714	1.0729	Small RNA Regulatory Pathway Members	1.72668e-11	47.92	XP_023310991.1	NFX1-type zinc finger-containing protein 1	0	89.26
JPS_TRINITY_DN3858_c0_g1	1395	1.20677	Small RNA Regulatory Pathway Members	4.16456e-10	50	XP_018576863.1	tudor and KH domain-containing protein homolog isoform X1	0	96.45
JPS_TRINITY_DN2843_c0_g1	3300	0.990178	Small RNA Regulatory Pathway Members	3.67376e-66	51.54	XP_018577775.1	putative ATP-dependent RNA helicase DHX30	0	89.65
JPS_TRINITY_DN5113_c0_g1	3990	-0.224548	Small RNA Regulatory Pathway Members	3.776e-39	64.04	XP_018577132.1	probable ATP-dependent RNA helicase YTHDC2	0	91.54
JPS_TRINITY_DN19132_c0_g1	1797	1.93687	Small RNA Regulatory Pathway Members	2.26436e-06	62.96	XP_018565596.1	probable ATP-dependent RNA helicase DDX55 homolog	0	96.49
JPS_TRINITY_DN14827_c0_g1	3612	1.25756	Small RNA Regulatory Pathway Members	5.99045e-28	45.96	XP_018569595.1	probable helicase senataxin isoform X1	0	90.03
JPS_TRINITY_DN7084_c0_g1	2211	1.40591	Small RNA Regulatory Pathway Members	6.92091e-06	60.56	XP_018568314.1	ATP-dependent RNA helicase ddx24	0	94.41
JPS_TRINITY_DN287_c0_g1	1404	2.05158	Small RNA Regulatory Pathway Members	4.8958e-06	57.81	XP_018576616.1	probable ATP-dependent RNA helicase DDX47	0	96.06
JPS_TRINITY_DN2378_c0_g1	1212	0.36541	Small RNA Regulatory Pathway Members	2.5442e-08	53.33	XP_018570679.1	eukaryotic initiation factor 4A-III	0	99.75
JPS_TRINITY_DN2867_c0_g1	2094	-0.0879517	Small RNA Regulatory Pathway Members	3.40686e-08	58.57	XP_018569661.1	putative ATP-dependent RNA helicase Pl10 isoform X1	0	94.31
JPS_TRINITY_DN461_c0_g1	1263	-0.45203	Small RNA Regulatory Pathway Members	3.1083e-07	58.82	XP_018562645.1	eukaryotic initiation factor 4A-I	0	99.05
JPS_TRINITY_DN13467_c0_g1	1953	0.730038	Small RNA Regulatory Pathway Members	7.48175e-07	56.36	XP_018578270.1	ATP-dependent RNA helicase vasa	0	96.78
JPS_TRINITY_DN1089_c0_g1	3789	-0.26465	Small RNA Regulatory Pathway Members	5.11313e-82	50	XP_018571064.1	dosage compensation regulator isoform X1	0	97.44
JPS_TRINITY_DN17597_c0_g1	2148	0.937198	Small RNA Regulatory Pathway Members	2.12076e-62	46.52	XP_018575304.1	putative pre-mRNA-splicing factor ATP-dependent RNA helicase PRP1	0	99.72
JPS_TRINITY_DN2527_c0_g1	3726	1.30185	Small RNA Regulatory Pathway Members	1.42036e-90	50	XP_018560906.1	putative ATP-dependent RNA helicase DHX57	0	97.88
JPS_TRINITY_DN5599_c0_g2	2568	-0.208002	Small RNA Regulatory Pathway Members	5.02158e-34	47.6	XP_018573100.1	probable ATP-dependent RNA helicase DHX34	0	95.56
JPS_TRINITY_DN14622_c0_g1	1446	1.33826	Small RNA Regulatory Pathway Members	3.37359e-27	45.01	XP_018569495.1	DNA replication ATP-dependent helicase/nuclease DNA2	0	94.13
JPS_TRINITY_DN2495_c0_g1	4074	0.552992	Small RNA Regulatory Pathway Members	6.13619e-08	43.72	XP_018567368.1	intron-binding protein aquarius isoform X1	0	98.45
JPS_TRINITY_DN6417_c0_g1	2364	1.90904	Small RNA Regulatory Pathway Members	3.63409e-09	52.87	XP_018562519.1	probable ATP-dependent RNA helicase CG8611	0	91.81
JPS_TRINITY_DN9615_c0_g1	1608	2.10017	Small RNA Regulatory Pathway Members	4.87065e-34	53.74	XP_018565164.1	double-stranded RNA-binding protein Staufen homolog	0	90.19
JPS_TRINITY_DN15761_c0_g1	1950	1.88447	Small RNA Regulatory Pathway Members	8.85733e-06	56.1	XP_018568466.1	probable ATP-dependent RNA helicase Dbp73D	0	92.14
JPS_TRINITY_DN4491_c0_g1	774	-0.131803	Small RNA Regulatory Pathway Members	1.31664e-78	71.6	XP_018569381.1	putative helicase mov-10-B.1	3.22302e-151	94.24
JPS_TRINITY_DN68463_c0_g1	957	0.752886	Small RNA Regulatory Pathway Members	1.22503e-91	62.89	XP_018571941.1	RISC-loading complex subunit tarbp2-like	0	91.88
JPS_TRINITY_DN5186_c0_g1	882	1.54345	Small RNA Regulatory Pathway Members	5.57873e-18	44.59	XP_018577762.1	uncharacterized protein LOC108916055	3.99038e-86	88.2
JPS_TRINITY_DN10506_c0_g2	522	0.337165	Small RNA Regulatory Pathway Members	3.43703e-75	84.02	XP_018571512.1	probable RNA helicase armi	9.46134e-107	97.09
JPS_TRINITY_DN14793_c0_g1	2142	1.37806	Small RNA Regulatory Pathway Members	2.33634e-69	49.85	XP_018568816.1	putative ATP-dependent RNA helicase DHX33	0	99.02
JPS_TRINITY_DN12136_c0_g1	2706	1.53722	Small RNA Regulatory Pathway Members	2.96112e-56	48.58	XP_971279.1	putative pre-mRNA-splicing factor ATP-dependent RNA helicase DHX16	0	96.99
JPS_TRINITY_DN5430_c0_g1	603	2.54392	Spaetzle-like Proteins	3.06311e-10	44.81	XP_023311103.1	uncharacterized protein LOC108913750 isoform X1	3.25909e-100	80
JPS_TRINITY_DN142798_c0_g1	771	0.614422	Spaetzle-like Proteins	3.90474e-37	65.31	XP_018564206.1	protein spaetzle-like	2.01212e-115	80.71
JPS_TRINITY_DN6057_c0_g1	579	1.90315	Spaetzle-like Proteins	1.35471e-19	52.63	XP_018564217.1	neurotrophin 1-like	1.1153e-122	95.83
JPS_TRINITY_DN8715_c0_g1	831	0.410383	Spaetzle-like Proteins	1.50027e-64	72.3	XP_018564202.1	protein spaetzle isoform X2	3.93465e-147	88.89
JPS_TRINITY_DN5627_c0_g1	357	-1.11994	Spaetzle-like Proteins	1.33188e-42	78.85	XP_023013698.1	monocyte to macrophage differentiation factor isoform X2	1.36759e-51	82.24
JPS_TRINITY_DN8923_c0_g4	1029	-0.440573	Spaetzle-like Proteins	3.84564e-78	87.05	XP_018575280.1	protein spaetzle 4	0	91.23
JPS_TRINITY_DN27938_c0_g1	1035	1.06403	Superoxide Dismutases	2.51554e-21	50.42	XP_018568129.1	uncharacterized protein LOC108908548	0	94.2
JPS_TRINITY_DN1432_c0_g1	1209	-0.313539	Superoxide Dismutases	3.58508e-14	55.32	JAB65448.1	V-type proton ATPase	0	94.79
JPS_TRINITY_DN14_c0_g1	465	-1.18356	Superoxide Dismutases	1.34641e-86	89.54	JAB65445.1	Superoxide dismutase (Cu-Zn)	7.65887e-105	99.35
JPS_TRINITY_DN3177_c0_g1	702	1.19856	Superoxide Dismutases	7.5752e-94	74.36	XP_018574477.1	copper chaperone for superoxide dismutase isoform X1	4.77339e-147	93.99
JPS_TRINITY_DN143049_c0_g1	510	-0.0347645	Superoxide Dismutases	2.70821e-60	67.66	XP_018569465.1	superoxide dismutase [Cu-Zn]-like	8.42333e-105	95.27
JPS_TRINITY_DN3261_c0_g2	597	0.21864	Superoxide Dismutases	5.11375e-44	66.05	XP_018573178.1	superoxide dismutase [Cu-Zn], chloroplastic isoform X1	5.54662e-91	82.91
JPS_TRINITY_DN1373_c0_g1	510	0.162139	Thioester-Containing Proteins	8.74738e-19	51.54	XP_018571980.1	uncharacterized protein LOC108911509	3.8889e-96	90.53
JPS_TRINITY_DN460_c0_g1	678	-0.930523	Thioester-Containing Proteins	1.89479e-26	55.81	XP_018567192.1	cytochrome b561 domain-containing protein 2-like	4.7879e-105	85.25
JPS_TRINITY_DN4360_c0_g1	672	0.0756728	Thioester-Containing Proteins	2.68093e-23	56.36	XP_018567157.1	cytochrome b561 domain-containing protein 2	1.08552e-136	90.58
JPS_TRINITY_DN5031_c0_g1	675	-1.64182	Thioester-Containing Proteins	1.22269e-18	53.21	XP_018567320.1	cytochrome b561 domain-containing protein 2-like	6.60986e-129	88.34
JPS_TRINITY_DN2325_c0_g2	828	0.677874	Thioester-Containing Proteins	1.73477e-10	48.45	XP_018570194.1	cytochrome b561 domain-containing protein 2	4.63971e-175	92.42
JPS_TRINITY_DN32994_c0_g1	1209	-3.57196	Thioredoxin Peroxidases	1.79588e-59	52.31	XP_023029624.1	uncharacterized protein LOC111517647	0	81.03
JPS_TRINITY_DN363_c1_g2	1950	2.68193	Thioredoxin Peroxidases	3.63452e-81	50.44	KAF0746049.1	protein FAM200B-like	0	67.59
JPS_TRINITY_DN22479_c0_g4	1137	-2.43409	Thioredoxin Peroxidases	2.75091e-59	54.18	XP_030746133.1	protein FAM200A-like	7.09906e-143	77.14
JPS_TRINITY_DN112606_c0_g1	744	-2.84077	Thioredoxin Peroxidases	7.46969e-16	51.88	XP_018570645.1	uncharacterized protein LOC108910509	6.78408e-72	68.95
JPS_TRINITY_DN2726_c1_g1	1809	-2.98049	Thioredoxin Peroxidases	4.92248e-15	39.71	KAB0790830.1	hypothetical protein	0	88.65
JPS_TRINITY_DN107740_c0_g1	777	-2.57606	Thioredoxin Peroxidases	2.65883e-12	51.49	JAB66335.1	NOF-FB transposable element associated protein	1.21338e-73	72.81
JPS_TRINITY_DN6596_c0_g2	432	0.748134	Thioredoxin Peroxidases	1.97902e-06	43.9	XP_018577567.1	uncharacterized protein LOC108915900	5.65222e-61	80.15
JPS_TRINITY_DN13283_c2_g1	2436	-3.3133	Thioredoxin Peroxidases	2.18552e-11	44.14	JAS73159.1	hypothetical protein	0	65.99
JPS_TRINITY_DN131122_c0_g1	348	-1.32246	Thioredoxin Peroxidases	2.43373e-09	63.24	XP_025996408.1	uncharacterized protein LOC113005286	2.03479e-37	76.52
JPS_TRINITY_DN6002_c0_g1	660	-1.19451	Thioredoxin Peroxidases	4.30375e-07	41.74	XP_023311575.1	uncharacterized protein LOC108913699	1.49412e-52	63.11
JPS_TRINITY_DN117_c2_g1	945	1.24418	Thioredoxin Peroxidases	4.02947e-11	57.81	XP_018567685.1	uncharacterized protein LOC108908220 isoform X1	0	99.66
JPS_TRINITY_DN9281_c0_g1	327	-2.5333	Thioredoxin Peroxidases	2.92614e-15	61.64	XP_023012018.1	uncharacterized protein LOC111502235	4.41516e-22	74.67
JPS_TRINITY_DN3558_c1_g1	618	-0.0440303	Thioredoxin Peroxidases	7.25634e-68	68.45	XP_018572603.1	peroxiredoxin-6-like	5.00045e-122	93.85
JPS_TRINITY_DN4340_c0_g1	453	0.468361	Toll pathway members	2.61764e-12	57.41	XP_018565298.1	ankyrin repeat domain-containing protein 27-like	1.74111e-91	97.9
JPS_TRINITY_DN5393_c0_g1	990	1.61298	Toll pathway members	1.2194e-13	50.9	XP_018569984.1	ankyrin repeat domain-containing protein 16	2.58408e-121	76.9
JPS_TRINITY_DN6326_c0_g1	2400	2.0791	Toll pathway members	3.51483e-13	50	XP_018569142.1	uncharacterized protein LOC108909316	3.35177e-163	52.15
JPS_TRINITY_DN11374_c1_g2	768	-1.27712	Toll pathway members	2.70229e-08	47.27	XP_023311285.1	uncharacterized protein LOC108909215	6.25586e-56	65.45
JPS_TRINITY_DN72176_c1_g1	435	-0.0155438	Toll pathway members	5.79914e-07	53.76	XP_024217907.1	serine/threonine-protein phosphatase 6 regulatory ankyrin repeat subunit B-like	3.41081e-17	62.14
JPS_TRINITY_DN63627_c0_g1	1473	-1.31685	Toll pathway members	2.7206e-08	64.41	MBC8972936.1	Zinc finger MYM-type protein 1	0	85.25
JPS_TRINITY_DN64507_c0_g1	1410	-4.53463	Toll pathway members	8.88934e-08	69.64	XP_030749267.1	uncharacterized protein LOC115877255	0	81.53
JPS_TRINITY_DN5289_c0_g2	1002	-2.12677	Toll pathway members	3.94614e-07	64.29	XP_018575035.1	zinc finger MYM-type protein 1-like	2.1876e-68	61.33
JPS_TRINITY_DN4015_c1_g1	4536	0.465093	Toll pathway members	5.78347e-19	49.76	XP_018569762.1	uncharacterized protein LOC108909819	0	66.77
JPS_TRINITY_DN5647_c6_g1	1668	-0.799355	Toll pathway members	2.19234e-14	51.15	XP_018570188.1	uncharacterized protein LOC108910146	0	85.45
JPS_TRINITY_DN60305_c0_g1	2469	-0.071257	Toll pathway members	8.09739e-08	66.67	XP_018570614.1	arf-GAP with coiled-coil, ANK repeat and PH domain-containing protein 2	0	99.27
JPS_TRINITY_DN12394_c0_g1	4155	1.89695	Toll pathway members	7.17296e-16	49.72	XP_023311281.1	uncharacterized protein LOC111691956	0	73.06
JPS_TRINITY_DN21263_c0_g1	1608	0.507731	Toll pathway members	3.48181e-11	47.45	XP_018569239.2	uncharacterized protein LOC108909396	0	75.96
JPS_TRINITY_DN491_c0_g1	8475	-0.591875	Toll pathway members	3.58026e-11	42.73	XP_023310988.1	ankyrin repeat domain-containing protein 17 isoform X13	0	96.23
JPS_TRINITY_DN14736_c0_g1	1239	-0.26947	Toll pathway members	1.86836e-23	54.5	XP_018577146.1	ankyrin repeat and death domain-containing protein 1A-like	0	90.98
JPS_TRINITY_DN5874_c0_g1	1317	-0.783116	Toll pathway members	3.07654e-16	46.89	XP_023022974.1	ankyrin repeat domain-containing protein 6-like	0	73.55
JPS_TRINITY_DN119506_c0_g1	999	0.568037	Toll pathway members	1.2328e-18	48.92	XP_018574498.1	uncharacterized protein LOC108913430	2.76875e-176	87.46
JPS_TRINITY_DN3950_c0_g1	4689	0.0783821	Toll pathway members	1.84314e-18	40.67	XP_018569762.1	uncharacterized protein LOC108909819	0	63.23
JPS_TRINITY_DN14257_c0_g2	2310	0.270071	Toll pathway members	9.98242e-13	44.54	XP_023310871.1	ankyrin repeat and sterile alpha motif domain-containing protein 1B	0	96.22
JPS_TRINITY_DN1560_c0_g1	3141	0.171347	Toll pathway members	1.07111e-06	61.02	XP_018576232.1	apoptosis-stimulating of p53 protein 1	0	97.94
JPS_TRINITY_DN20263_c0_g1	2004	-1.50184	Toll pathway members	2.59994e-21	52.08	XP_018572420.2	uncharacterized protein LOC108911851 isoform X2	0	66.29
JPS_TRINITY_DN495_c0_g1	8484	-0.154746	Toll pathway members	2.61854e-18	50.78	XP_023312689.1	uncharacterized protein LOC108914600	0	63.09
JPS_TRINITY_DN10095_c0_g2	1719	-0.288287	Toll pathway members	8.64072e-12	46.26	XP_018575402.1	uncharacterized protein LOC108914157	0	98.08
JPS_TRINITY_DN8740_c0_g1	1602	-0.80657	Toll pathway members	2.87699e-09	51.9	XP_018571754.1	ankyrin repeat and SOCS box protein 14-like	0	94.11
JPS_TRINITY_DN23515_c0_g1	534	-0.0111851	Toll pathway members	2.6567e-07	45.32	JAB62154.1	Receptor-interacting serine/threonine-protein kinase 4	4.64228e-99	88.89
JPS_TRINITY_DN6167_c0_g1	3447	-1.33394	Toll pathway members	2.37203e-20	47.39	XP_018566660.1	atrial natriuretic peptide receptor 2	0	97.47
JPS_TRINITY_DN17307_c2_g1	1344	-2.20775	Toll pathway members	1.793e-12	50.34	XP_023311285.1	uncharacterized protein LOC108909215	5.12124e-176	73.21
JPS_TRINITY_DN1781_c0_g2	4464	-0.614749	Toll pathway members	1.64172e-09	50.35	XP_018570620.1	kinase D-interacting substrate of 220 kDa B isoform X1	0	96.94
JPS_TRINITY_DN5851_c0_g1	1596	0.76633	Toll pathway members	2.42237e-09	47.96	XP_018571753.1	uncharacterized protein LOC108911327	0	96.61
JPS_TRINITY_DN5495_c1_g5	507	-0.692462	Toll pathway members	4.17483e-06	51.08	JAB62770.1	26S proteasome non-ATPase regulatory subunit 10	3.90168e-56	76.13
JPS_TRINITY_DN7201_c1_g2	3270	0.229772	Toll pathway members	5.84452e-19	45.2	XP_018568282.1	cyclin-dependent kinase 12 isoform X3	0	96.54
JPS_TRINITY_DN8792_c0_g1	3090	0.910757	Toll pathway members	2.98289e-11	44.81	XP_023313108.1	transient receptor potential cation channel subfamily A member 1	0	96.94
JPS_TRINITY_DN6172_c0_g1	594	1.47362	Toll pathway members	3.23136e-07	42.96	XP_018576600.1	ankyrin repeat domain-containing protein 49-like	6.94636e-131	93.91
JPS_TRINITY_DN4664_c0_g1	1221	0.154467	Toll pathway members	3.4247e-19	50.28	XP_018572458.1	TNF receptor-associated factor 6	0	98.77
JPS_TRINITY_DN12607_c0_g1	2592	1.21615	Toll pathway members	4.89309e-15	53.25	XP_018569142.1	uncharacterized protein LOC108909316	0	70.57
JPS_TRINITY_DN10119_c0_g1	1878	-0.806908	Toll pathway members	1.49614e-12	51.81	XP_018564871.1	palmitoyltransferase Hip14	0	99.04
JPS_TRINITY_DN733_c1_g1	2946	-1.22937	Toll pathway members	1.77293e-11	54.26	XP_023310065.1	uncharacterized protein LOC108910389	0	98.78
JPS_TRINITY_DN11581_c0_g1	2784	1.39942	Toll pathway members	9.00452e-11	51.08	XP_018566052.1	transient receptor potential channel pyrexia-like	0	94.38
JPS_TRINITY_DN9138_c0_g1	4365	-0.586568	Toll pathway members	1.94393e-07	48.91	XP_018576381.1	protein TANC2 isoform X2	0	99.45
JPS_TRINITY_DN11207_c0_g1	3651	0.455087	Toll pathway members	1.53873e-17	51.41	XP_023311715.1	uncharacterized protein LOC108913550	0	71.16
JPS_TRINITY_DN4074_c0_g1	3516	-0.572155	Toll pathway members	5.64488e-16	46.32	XP_018580221.1	tankyrase	0	99.32
JPS_TRINITY_DN3806_c2_g1	657	-0.550115	Toll pathway members	1.81282e-15	51.26	XP_018569142.1	uncharacterized protein LOC108909316	5.76199e-46	63.21
JPS_TRINITY_DN579_c0_g1	1929	0.438053	Toll pathway members	4.58191e-14	49.4	XP_018563329.1	protein fem-1 homolog B isoform X2	0	99.38
JPS_TRINITY_DN3753_c0_g1	1137	0.119228	Toll pathway members	7.78815e-13	46.4	XP_018568957.1	KN motif and ankyrin repeat domain-containing protein 1	0	98.33
JPS_TRINITY_DN3950_c0_g2	489	1.60951	Toll pathway members	1.27522e-10	45.32	XP_018569762.1	uncharacterized protein LOC108909819	2.01928e-28	63.49
JPS_TRINITY_DN3806_c1_g1	3459	-0.322869	Toll pathway members	5.30783e-19	40.12	XP_018569142.1	uncharacterized protein LOC108909316	0	67.9
JPS_TRINITY_DN5673_c0_g1	3078	-0.721022	Toll pathway members	3.42898e-13	47.94	XP_974870.1	E3 ubiquitin-protein ligase MIB1	0	97.37
JPS_TRINITY_DN146149_c0_g1	681	0.881622	Toll pathway members	6.5101e-08	44.72	XP_018576839.1	26S proteasome non-ATPase regulatory subunit 10-like	3.31901e-153	96.46
JPS_TRINITY_DN816_c0_g1	3129	0.164333	Toll pathway members	5.50476e-18	48.85	XP_018565401.1	serine/threonine-protein phosphatase 6 regulatory ankyrin repeat subunit A-like	0	97.98
JPS_TRINITY_DN25294_c0_g1	1176	-2.97362	Toll pathway members	2.38868e-13	48.65	XP_018572747.1	ankyrin-3-like	0	92.84
JPS_TRINITY_DN5770_c0_g2	1851	-0.263878	Toll pathway members	1.025e-12	43.6	XP_018566777.1	protein fem-1 homolog CG6966 isoform X2	0	100
JPS_TRINITY_DN1087_c0_g1	699	-0.686026	Toll pathway members	7.70402e-12	48	XP_018576925.1	death-associated protein kinase 1-like	1.04845e-144	98.28
JPS_TRINITY_DN35844_c0_g1	816	0.649734	Toll pathway members	9.60482e-10	45.54	XP_018574502.1	ankyrin repeat and KH domain-containing protein 1-like	2.35267e-98	73.45
JPS_TRINITY_DN17349_c0_g2	5412	1.25107	Toll pathway members	9.75289e-07	52	XP_018573823.1	uncharacterized protein LOC108912890	0	91.12
JPS_TRINITY_DN644_c0_g1	1296	0.51277	Toll pathway members	4.9627e-94	70.51	XP_018575417.1	myeloid differentiation primary response protein MyD88 isoform X2	0	94.01
JPS_TRINITY_DN31897_c0_g1	4455	-0.373632	Toll pathway members	2.16152e-15	46.88	XP_023311592.1	uncharacterized protein LOC108909966	0	81.66
JPS_TRINITY_DN2574_c0_g1	2094	0.165027	Toll pathway members	2.53504e-09	42.86	XP_018577181.1	AP2-associated protein kinase 1	0	97.84
JPS_TRINITY_DN12717_c0_g1	1764	0.0219407	Toll pathway members	2.58687e-64	65.61	XP_018569985.1	uncharacterized protein LOC108909987	0	84.18
JPS_TRINITY_DN5610_c0_g1	1266	-1.51124	Toll pathway members	1.0947e-10	55.79	XP_018569715.1	ankyrin repeat domain-containing protein 33B-like	0	97.06
JPS_TRINITY_DN3740_c0_g3	900	-1.3262	Toll pathway members	1.36414e-10	57.14	XP_018564572.1	ankyrin repeat domain-containing protein 29	0	99
JPS_TRINITY_DN6524_c0_g1	888	1.91146	Toll pathway members	2.00731e-08	51.7	XP_018574224.1	uncharacterized protein LOC108913204	1.28953e-166	91.5
JPS_TRINITY_DN5495_c0_g1	1566	-0.0758843	Toll pathway members	3.03799e-07	52.34	XP_023311285.1	uncharacterized protein LOC108909215	0	76.67
JPS_TRINITY_DN13356_c0_g3	3072	-2.37295	Toll-like Receptors	2.13633e-32	51.9	XP_023310328.1	slit homolog 3 protein-like	0	61.18
JPS_TRINITY_DN51713_c0_g1	858	0.0134394	Toll-like Receptors	1.13285e-14	48.9	XP_018570139.1	SLIT and NTRK-like protein 6	3.7452e-179	95.83
JPS_TRINITY_DN51_c0_g1	1452	0.208289	Toll-like Receptors	8.70979e-16	45.08	XP_018565999.1	leucine-rich repeat neuronal protein 1 isoform X2	0	96.89
JPS_TRINITY_DN126764_c0_g1	348	-1.65497	Toll-like Receptors	1.28127e-08	65.79	XP_028135282.1	uncharacterized protein LOC114330160	1.55307e-36	73.73
JPS_TRINITY_DN2667_c0_g1	972	1.02762	Toll-like Receptors	1.38506e-08	45.71	XP_018561904.1	P-granule-associated novel protein 1-like	8.92718e-120	76
JPS_TRINITY_DN10989_c0_g2	1131	-3.19599	Toll-like Receptors	1.19206e-06	52.88	XP_018576628.1	uncharacterized protein LOC108915146	0	87.8
JPS_TRINITY_DN2667_c0_g2	966	0.485112	Toll-like Receptors	1.26784e-06	49.25	XP_018561904.1	P-granule-associated novel protein 1-like	1.03344e-109	74.1
JPS_TRINITY_DN6349_c0_g1	741	-0.893394	Toll-like Receptors	2.49196e-06	48.28	XP_019760454.1	uncharacterized protein LOC109537926	1.27114e-52	67.94
JPS_TRINITY_DN7434_c0_g1	1146	1.28364	Toll-like Receptors	3.0629e-29	53.33	XP_023309932.1	protein artichoke-like	7.80323e-164	82.68
JPS_TRINITY_DN12030_c0_g1	702	-1.01485	Toll-like Receptors	2.03238e-10	56.25	XP_018575362.1	slit homolog 2 protein-like	2.4917e-132	93.97
JPS_TRINITY_DN863_c2_g2	1392	-0.198591	Toll-like Receptors	1.31477e-15	46.18	XP_023310371.1	leucine-rich repeat neuronal protein 3	0	95.68
JPS_TRINITY_DN40586_c0_g2	729	2.68507	Toll-like Receptors	1.66812e-07	49.38	XP_018569940.1	leucine-rich repeat-containing protein 15-like	2.50836e-89	78.51
JPS_TRINITY_DN10155_c0_g1	3249	-1.04698	Toll-like Receptors	8.68635e-47	51.02	XP_018576955.1	protein artichoke	0	97.48
JPS_TRINITY_DN4528_c0_g1	1317	-0.237748	Toll-like Receptors	4.45659e-16	42	XP_018566114.1	protein singed wings 2	0	94.06
JPS_TRINITY_DN4841_c0_g1	1359	0.291087	Toll-like Receptors	1.74897e-13	46.07	JAB64179.1	Leucine-rich repeat neuronal protein 1	0	96.75
JPS_TRINITY_DN16388_c0_g1	3855	-0.0966594	Toll-like Receptors	3.58179e-27	48.97	XP_018562488.1	chaoptin	0	94.65
JPS_TRINITY_DN12244_c0_g2	1539	1.2734	Toll-like Receptors	1.52039e-24	51.75	XP_018570361.1	toll-like receptor 3 isoform X1	0	91.07
JPS_TRINITY_DN6554_c1_g1	2133	-0.640722	Toll-like Receptors	1.22162e-20	48.7	XP_018579957.1	uncharacterized protein LOC108917705	0	99.01
JPS_TRINITY_DN51491_c0_g1	951	1.05282	Toll-like Receptors	4.96197e-14	43.19	XP_023309963.1	vasorin-like	0	90.51
JPS_TRINITY_DN41427_c0_g1	1491	0.153799	Toll-like Receptors	6.78008e-23	52.34	JAB63477.1	Leucine-rich repeat-containing protein 15	0	92.56
JPS_TRINITY_DN9944_c0_g1	2175	-0.849296	Toll-like Receptors	1.24015e-12	48.51	XP_018571270.1	protein lap1-like	0	98.48
JPS_TRINITY_DN8098_c0_g1	1527	2.69985	Toll-like Receptors	1.90712e-28	51.12	XP_023309932.1	protein artichoke-like	0	84.84
JPS_TRINITY_DN141639_c0_g1	1701	0.124587	Toll-like Receptors	2.8699e-24	49.56	XP_018570641.1	insulin-like growth factor-binding protein complex acid labile subunit	0	95.76
JPS_TRINITY_DN10719_c0_g1	1638	-0.736659	Toll-like Receptors	7.84983e-31	50	XP_018563628.1	leucine-rich repeat and immunoglobulin-like domain-containing nogo receptor-interacting protein 2	0	97.8
JPS_TRINITY_DN2508_c0_g1	1461	0.45199	Toll-like Receptors	9.12407e-22	50.77	XP_018575510.1	leucine-rich repeat-containing G-protein coupled receptor 4	0	96.3
JPS_TRINITY_DN1544_c0_g1	960	1.54228	Toll-like Receptors	2.16061e-16	54.75	JAB64217.1	Leucine-rich repeat-containing protein 15	3.52072e-101	79.25
JPS_TRINITY_DN1059_c0_g1	942	0.0885802	Toll-like Receptors	2.59043e-08	44.95	XP_018568727.1	leucine-rich repeat-containing protein 1-like	3.03744e-180	95.21
JPS_TRINITY_DN96452_c0_g1	981	0.646517	Toll-like Receptors	4.1756e-15	52.82	XP_018573517.1	slit homolog 3 protein-like	4.92576e-141	83.99
JPS_TRINITY_DN3437_c0_g1	993	2.7056	Toll-like Receptors	4.91993e-14	47.06	XP_018571844.1	SLIT and NTRK-like protein 6	4.09625e-174	90.61
JPS_TRINITY_DN42138_c0_g3	1404	0.305582	Toll-like Receptors	1.54416e-17	44.8	XP_030757210.1	leucine-rich repeat-containing protein 15-like	3.56715e-117	70.85
JPS_TRINITY_DN2916_c0_g1	3717	1.04195	Toll-like Receptors	5.77207e-10	45.53	XP_018562698.1	protein flightless-1 isoform X2	0	97.98
JPS_TRINITY_DN67251_c0_g1	1542	-1.9677	Toll-like Receptors	5.79626e-30	43.99	XP_008192240.1	lutropin-choriogonadotropic hormone receptor isoform X3	0	91.28
JPS_TRINITY_DN66885_c0_g1	2841	0.160217	Toll-like Receptors	9.19712e-34	46.43	XP_018576426.1	chaoptin-like	0	85.32
JPS_TRINITY_DN13429_c0_g1	717	0.542701	Toll-like Receptors	2.7614e-11	50.63	XP_018580169.1	leucine-rich repeat-containing protein 57	3.38097e-153	98.32
JPS_TRINITY_DN120675_c0_g1	1599	-0.524474	Toll-like Receptors	8.75139e-11	43.26	XP_023310328.1	slit homolog 3 protein-like	0	81.91
JPS_TRINITY_DN2824_c0_g2	639	2.83704	Toll-like Receptors	7.97698e-08	48.8	XP_018562348.1	leucine-rich repeat protein SHOC-2 isoform X1	5.50031e-153	99.53
JPS_TRINITY_DN4676_c0_g1	741	0.0823013	Toll-like Receptors	7.70858e-08	49.44	XP_018571853.1	peroxidasin-like protein	3.01844e-74	88.82
JPS_TRINITY_DN49366_c0_g1	1026	-0.118869	Toll-like Receptors	8.75981e-13	47.34	XP_018563766.1	chondroadherin-like	0	90.86
JPS_TRINITY_DN2171_c0_g1	1302	0.902493	Toll-like Receptors	1.05792e-19	53.24	XP_023023978.1	phospholipase A2 inhibitor-like	1.63693e-81	59.72
JPS_TRINITY_DN42878_c0_g1	1281	-1.61417	Toll-like Receptors	8.138e-19	48.5	XP_018563183.1	toll-like receptor 13	4.18094e-174	86.42
JPS_TRINITY_DN7087_c0_g1	720	3.31299	Toll-like Receptors	1.17213e-12	49.74	XP_018569940.1	leucine-rich repeat-containing protein 15-like	2.86951e-96	81.43
JPS_TRINITY_DN4603_c0_g1	1932	1.41999	Toll-like Receptors	7.42707e-08	48.43	XP_018578301.1	serine/threonine-protein kinase 11-interacting protein	0	96.27
JPS_TRINITY_DN25251_c0_g1	1458	1.23509	Toll-like Receptors	3.39342e-26	48.5	XP_018577773.1	leucine-rich repeats and immunoglobulin-like domains protein 1	0	83.33
JPS_TRINITY_DN36896_c0_g3	987	-0.535939	Toll-like Receptors	2.27508e-14	50.49	XP_018572574.1	slit homolog 3 protein-like	0	91.72
JPS_TRINITY_DN24698_c5_g1	1758	-2.06751	Toll-like Receptors	5.11463e-22	47.92	XP_018569159.1	leucine-rich repeat-containing protein 15-like	0	94.02
JPS_TRINITY_DN58773_c0_g1	1065	0.75993	Toll-like Receptors	2.65594e-09	52.02	XP_018571573.1	leucine-rich repeat-containing protein 58 isoform X1	0	97.04
JPS_TRINITY_DN4263_c0_g1	2541	0.534022	Toll-like Receptors	4.18699e-17	41.81	XP_018580297.1	insulin-like growth factor-binding protein complex acid labile subunit isoform X1	0	96.33
JPS_TRINITY_DN5425_c0_g1	1086	-0.483212	Toll-like Receptors	8.99426e-17	50.55	XP_018571771.1	slit homolog 3 protein-like	0	91.28
JPS_TRINITY_DN40312_c0_g1	2733	-0.810602	Toll-like Receptors	2.84562e-11	45.92	XP_018576800.1	protein phosphatase PHLPP-like protein	0	97.71
JPS_TRINITY_DN1953_c0_g1	855	0.836897	Toll-like Receptors	1.67608e-07	52.14	XP_018580069.1	ras suppressor protein 1	0	99.3
JPS_TRINITY_DN10159_c0_g1	1101	-0.951936	Toll-like Receptors	1.92092e-21	55.78	XP_018572978.1	decorin-like	0	89.62
JPS_TRINITY_DN42955_c0_g1	1347	-0.822198	Toll-like Receptors	2.18089e-20	47.52	XP_018563913.1	toll-like receptor 6	0	80.71
JPS_TRINITY_DN6813_c0_g1	861	0.417436	Toll-like Receptors	4.47557e-19	49.25	XP_018572979.1	slit homolog 3 protein	1.71488e-161	90.91
JPS_TRINITY_DN6267_c0_g2	1704	-0.762978	Toll-like Receptors	1.28365e-18	45.77	XP_018572362.1	leucine-rich repeat protein soc-2 homolog	0	99.47
JPS_TRINITY_DN17663_c0_g1	879	-0.381761	Toll-like Receptors	9.33297e-12	52.73	XP_028136928.1	P-granule-associated novel protein 1-like	3.2258e-81	67.64
JPS_TRINITY_DN13425_c0_g1	4014	-0.796467	Toll-like Receptors	1.22005e-37	47.68	XP_018576705.1	chaoptin	0	96.19
JPS_TRINITY_DN49299_c0_g1	1542	0.852271	Toll-like Receptors	1.53083e-34	46.53	XP_018568560.1	carboxypeptidase N subunit 2-like	0	97.4
JPS_TRINITY_DN8145_c0_g1	2028	1.0586	Toll-like Receptors	1.43728e-26	45.41	JAB64929.1	Insulin-like growth factor-binding protein complex acid labile subunit	0	94.96
JPS_TRINITY_DN4797_c0_g1	1545	1.86366	Toll-like Receptors	3.00533e-13	52.88	XP_018572838.1	leucine-rich repeat-containing protein 47-like	0	92.59
JPS_TRINITY_DN3295_c0_g5	1395	-1.03786	Toll-like Receptors	2.12923e-08	46.25	XP_018571415.1	leucine-rich repeat-containing protein 15-like isoform X1	0	83
JPS_TRINITY_DN279_c0_g1	507	-0.0441693	Toll-like Receptors	2.5973e-08	60.24	JAB67716.1	CCR4-NOT transcription complex subunit	1.37063e-110	99.38
JPS_TRINITY_DN5850_c0_g1	960	1.2737	Toll-like Receptors	1.52877e-17	46.21	XP_018568503.1	toll-like receptor 7	0	93.44
JPS_TRINITY_DN80491_c0_g1	1140	-0.229454	Toll-like Receptors	1.2188e-14	49.58	XP_018562323.1	leucine-rich repeat-containing protein 15-like	0	89.95
JPS_TRINITY_DN51865_c0_g1	1161	0.313276	Toll-like Receptors	1.06368e-10	48.02	XP_018575570.1	leucine-rich repeat-containing protein let-4-like	0	84.21
JPS_TRINITY_DN2533_c1_g1	1893	1.24912	Toll-like Receptors	9.28932e-19	44.2	XP_018569880.1	protein artichoke-like	0	73.7
JPS_TRINITY_DN37540_c0_g1	1218	3.23844	Toll-like Receptors	1.21817e-08	50.33	XP_018575574.2	chaoptin-like	3.07487e-129	81.67
JPS_TRINITY_DN42553_c0_g1	2562	-1.21122	Toll-like Receptors	1.54388e-19	45.5	XP_023020601.1	protein artichoke-like	0	65.65
JPS_TRINITY_DN6149_c0_g1	957	0.410253	Toll-like Receptors	2.46881e-18	51.18	XP_018565248.1	prolargin-like	0	93.69
JPS_TRINITY_DN11940_c0_g1	2646	-1.69287	Toll-like Receptors	7.46791e-16	43.56	XP_023311024.1	vasorin isoform X1	0	97.71
JPS_TRINITY_DN25615_c0_g2	615	-2.78249	Toll-like Receptors	2.69564e-15	48.52	XP_018564957.1	relaxin receptor 2	6.89868e-114	93.07
JPS_TRINITY_DN63823_c0_g1	1314	1.22671	Toll-like Receptors	1.52267e-14	47.37	JAB63928.1	Immunoglobulin superfamily member 10	0	91.57
JPS_TRINITY_DN8955_c0_g1	2157	0.737377	Toll-like Receptors	1.08542e-14	47.33	XP_018565691.1	leucine-rich repeat protein SHOC-2	0	94.45
JPS_TRINITY_DN7105_c0_g1	2265	-0.566099	Toll-like Receptors	9.81671e-23	42.33	XP_018570646.1	leucine-rich repeat-containing protein 15	0	95.77
JPS_TRINITY_DN53745_c0_g1	1974	-0.423677	Toll-like Receptors	6.49404e-16	55.74	XP_018563913.1	toll-like receptor 6	1.04553e-143	65.07
JPS_TRINITY_DN56388_c0_g1	981	1.06019	Toll-like Receptors	8.92066e-11	56.88	XP_018567352.1	toll-like receptor 6 isoform X1	0	88.96
JPS_TRINITY_DN20891_c0_g1	1182	1.48893	Toll-like Receptors	2.89597e-12	59.26	XP_018575573.1	leucine-rich repeat-containing protein 1-like	4.53159e-151	81.63
JPS_TRINITY_DN75040_c0_g1	1437	0.440459	Toll-like Receptors	1.2174e-06	59.34	XP_018562609.1	leucine-rich repeat and IQ domain-containing protein 4-like	0	89.98
JPS_TRINITY_DN5267_c0_g1	1326	-4.2651	Toll-like Receptors	4.13375e-21	49.34	XP_023310465.1	chondroadherin-like	0	93.21
JPS_TRINITY_DN773_c0_g1	2103	0.678996	Toll-like Receptors	1.61533e-16	50.46	XP_018578713.1	leucine-rich repeat-containing protein 15	0	90.31
JPS_TRINITY_DN6497_c0_g1	1017	1.12979	Toll-like Receptors	7.02875e-21	52.3	XP_028153152.1	leucine-rich repeat-containing G-protein coupled receptor 4-like	8.68224e-86	64.72
JPS_TRINITY_DN12244_c0_g1	1461	0.710411	Toll-like Receptors	1.49483e-24	48.71	XP_018570364.1	leucine-rich repeat-containing protein let-4 isoform X2	0	91.39
JPS_TRINITY_DN143014_c0_g1	927	1.52421	Toll-like Receptors	1.96855e-12	46.98	VEN34924.1	unnamed protein product	7.281e-96	68.81
JPS_TRINITY_DN16903_c0_g1	414	-0.243119	Toll-like Receptors	1.82361e-59	90.76	XP_018564960.1	toll-like receptor 13	2.07808e-75	99.16
JPS_TRINITY_DN52996_c0_g2	1476	0.712444	Toll-like Receptors	3.12631e-41	47.83	XP_018564753.1	E3 ubiquitin-protein ligase SIAH1B-like	0	89.61
JPS_TRINITY_DN1493_c0_g1	1509	1.63071	Toll-like Receptors	1.32698e-33	45.78	XP_023312905.1	E3 ubiquitin-protein ligase sina-like	0	85.89
JPS_TRINITY_DN2580_c0_g1	1527	1.36073	Toll-like Receptors	1.22612e-28	45.74	XP_018563194.1	E3 ubiquitin-protein ligase sina	0	94.29
JPS_TRINITY_DN10003_c0_g1	1647	0.90438	Toll-like Receptors	1.52739e-28	42.31	XP_018571585.1	uncharacterized protein LOC108911198	0	89.96
JPS_TRINITY_DN1406_c0_g1	1623	0.674793	Toll-like Receptors	3.39459e-23	45.51	JAB66415.1	E3 ubiquitin-protein ligase	0	77.53
JPS_TRINITY_DN9636_c0_g1	384	-0.574649	Toll-like Receptors	1.59257e-19	72.31	XP_018564747.1	uncharacterized protein LOC108906081	2.17766e-42	86.08
JPS_TRINITY_DN5254_c0_g1	876	-0.271434	Toll-like Receptors	1.66733e-13	52.03	XP_018578423.1	E3 ubiquitin-protein ligase SIAH1 isoform X1	0	99.31
JPS_TRINITY_DN3137_c0_g1	1239	-0.2216	Toll-like Receptors	1.03062e-11	58.02	XP_018562373.1	uncharacterized protein LOC108904343 isoform X1	0	92.48
JPS_TRINITY_DN2712_c0_g2	906	0.867343	Toll-like Receptors	4.60833e-10	41.61	XP_018563397.1	E3 ubiquitin-protein ligase SIAH1-like	2.75452e-173	89.67
JPS_TRINITY_DN2712_c0_g3	906	0.867343	Toll-like Receptors	4.60833e-10	41.61	XP_018563397.1	E3 ubiquitin-protein ligase SIAH1-like	2.75452e-173	89.67
JPS_TRINITY_DN1189_c0_g1	1155	0.558016	Toll-like Receptors	7.48537e-10	46.15	XP_018562381.1	uncharacterized protein LOC108904349	0	95.56
JPS_TRINITY_DN19505_c0_g1	822	-0.111925	Toll-like Receptors	7.58649e-10	45.05	JAB65125.1	hypothetical protein	1.44572e-177	94.51
JPS_TRINITY_DN12513_c0_g1	2064	-0.0623861	Toll-like Receptors	2.13523e-09	50.88	XP_018571889.1	uncharacterized protein LOC108911434	0	81.84
JPS_TRINITY_DN53427_c0_g1	1227	0.900199	Toll-like Receptors	6.35374e-09	53.01	JAB67740.1	putative E3 ubiquitin-protein ligase	1.09101e-128	97.4
JPS_TRINITY_DN3012_c0_g1	1962	-0.135872	Toll-like Receptors	1.27024e-08	48.55	XP_023310309.1	uncharacterized protein LOC108904347	0	92.99
JPS_TRINITY_DN976_c0_g1	1164	-0.248009	Toll-like Receptors	1.47432e-08	51.49	JAB66382.1	hypothetical protein	0	92.8
JPS_TRINITY_DN16344_c0_g1	1572	-1.23996	Toll-like Receptors	3.46771e-08	47.5	XP_023024583.1	uncharacterized protein LOC111512669	8.54129e-38	43.17
JPS_TRINITY_DN8192_c0_g3	1140	-0.614016	Toll-like Receptors	4.87316e-07	46.61	XP_018562368.1	uncharacterized protein LOC108904337	0	97.1
JPS_TRINITY_DN6629_c0_g1	1194	1.99073	Toll-like Receptors	1.78727e-06	45.56	JAB67288.1	E3 ubiquitin-protein ligase	0	86
