# Supplementary material for: Transcriptome Analysis of the Japanese Pine Sawyer Beetle, Monochamus alternatus, Infected with the Entomopathogenic Fungus Metarhizium anisopliae JEF-197
Source: J Fungi (Basel). 2021 May 10;7(5):373. doi: 10.3390/jof7050373 (PMC8151162; doi:10.3390/jof7050373)
Supplement: Supplementary file 1 [file jof-07-00373-s001.zip › Supplementary Table S8.xlsx]

## Sheet: Supplement Table S8
Supplementary Table S8. The DEGs of Metarhizium anisopliae JEF-197 in Japanese pine sawyer (FDR < 0.05)
Sequence name	Length	LogFC	FDR	e-Value	sim mean	Gene id	Description	Reference organism
Ma_TRINITY_DN8429_c0_g1	495	13.1379	8.16e-39	4.3e-20	97.78	XP_011410798.1	FAD binding domain protein	Metarhizium robertsii
Ma_TRINITY_DN5705_c0_g1	537	11.9062	3.24e-29	1e-122	100	KAF5132917.1	hypothetical protein E5D57_003539	Metarhizium anisopliae
Ma_TRINITY_DN30_c0_g1	831	11.2575	3.68e-62	0	100	KID83782.1	ATP synthase beta chain precursor	Metarhizium guizhouense
Ma_TRINITY_DN13644_c0_g1	825	9.85719	3.15e-10	2.5e-146	96.24	KJK94800.1	hypothetical protein H633G_01310	Metarhizium anisopliae
Ma_TRINITY_DN10801_c0_g1	453	9.83945	2.28e-12	2.5e-76	97.35	KID82424.1	hypothetical protein MGU_10271	Metarhizium guizhouense
Ma_TRINITY_DN2376_c0_g1	876	9.74883	2.25e-71	1.2e-117	92.65	KAF5139117.1	hypothetical protein E5D57_002907	Metarhizium anisopliae
Ma_TRINITY_DN2194_c0_g2	300	9.54453	5.5e-08				---NA---
Ma_TRINITY_DN2559_c1_g1	414	9.40269	4.17e-09				---NA---
Ma_TRINITY_DN13808_c0_g1	357	9.35939	7e-05	3.2e-76	100	XP_014542145.1	Major facilitator superfamily domain, general substrate transporter	Metarhizium brunneum
Ma_TRINITY_DN2690_c0_g1	312	8.82347	1.32e-22	3.2e-41	98.63	AAL13172.2	recQ family helicase	Metarhizium anisopliae
Ma_TRINITY_DN3990_c0_g1	1638	8.1775	9.69e-75	0	96.88	KFG86354.1	protein BFR2	Metarhizium anisopliae
Ma_TRINITY_DN1518_c0_g2	459	8.12898	1.02e-18				---NA---
Ma_TRINITY_DN2166_c0_g2	297	7.70124	2.67e-52				---NA---
Ma_TRINITY_DN3286_c0_g1	444	7.24669	1.12e-25	3e-50	97.96	KIE03684.1	ubiquinol-cytochrome c reductase complex subunit	Metarhizium majus
Ma_TRINITY_DN4143_c0_g1	1596	7.15642	1.92e-14	0	99.81	KJK77042.1	hypothetical protein H634G_07618	Metarhizium anisopliae
Ma_TRINITY_DN4752_c0_g2	357	7.06473	3.94e-08				---NA---
Ma_TRINITY_DN1067_c0_g1	369	6.58287	2.2e-48				---NA---
Ma_TRINITY_DN2018_c1_g1	387	6.47196	1.31e-28				---NA---
Ma_TRINITY_DN2848_c0_g1	1212	6.42496	1.58e-37	0	98.48	KJK76458.1	hypothetical protein H634G_08349	Metarhizium anisopliae
Ma_TRINITY_DN1909_c0_g1	336	6.20588	9.15e-13	8.5e-49	98.7	XP_013946763.1	hypothetical protein TRIATDRAFT_214689	Trichoderma atroviride
Ma_TRINITY_DN6356_c0_g1	333	6.13925	4.17e-09	3.9e-74	98.18	XP_007819286.1	hypothetical protein MAA_03097	Metarhizium robertsii
Ma_TRINITY_DN658_c1_g1	405	6.08476	1.16e-07	5.3e-23	100	KJK84290.1	hypothetical protein H634G_00654	Metarhizium anisopliae
Ma_TRINITY_DN10086_c0_g1	732	6.05667	0.000455	1.3e-175	100	XP_007824542.1	methyltransferase SirN-like protein	Metarhizium robertsii
Ma_TRINITY_DN1000_c0_g1	3099	6.02875	3.76e-58	0	99.39	EXV05302.1	Spt20 family protein	Metarhizium robertsii
Ma_TRINITY_DN2966_c0_g2	924	5.79432	1e-06	2.3e-173	99.65	KJK85944.1	hypothetical protein H633G_10205	Metarhizium anisopliae
Ma_TRINITY_DN5486_c0_g1	1404	5.63027	2.01e-08	0	95.68	XP_007826203.1	DUF4419 domain protein	Metarhizium robertsii
Ma_TRINITY_DN464_c0_g2	1278	5.28648	5.06e-17	0	98.5	KIE02353.1	DUF124 domain-containing protein	Metarhizium majus
Ma_TRINITY_DN8373_c0_g1	741	4.99484	7.64e-07	2.3e-118	99.14	XP_007824270.2	hypothetical protein MAA_08081	Metarhizium robertsii
Ma_TRINITY_DN896_c0_g1	315	4.75265	0.007532	1.6e-72	100	KID95583.1	stress responsive A/B barrel domain-containing protein	Metarhizium majus
Ma_TRINITY_DN763_c0_g1	525	4.73264	6.17e-10	1e-88	94.83	KAF5139106.1	hypothetical protein E5D57_002896	Metarhizium anisopliae
Ma_TRINITY_DN58_c0_g1	333	4.64311	9.31e-37	4.6e-42	94.52	KJK89688.1	hypothetical protein H633G_06433	Metarhizium anisopliae
Ma_TRINITY_DN3747_c0_g1	5268	3.88384	7.85e-23	0	100	XP_007816847.1	DNA-directed RNA polymerase II largest subunit	Metarhizium robertsii
Ma_TRINITY_DN1354_c0_g1	465	3.73964	2.48e-08	1.4e-106	100	KFG86477.1	Superoxide dismutase	Metarhizium anisopliae
Ma_TRINITY_DN10479_c0_g1	996	3.66234	2.09e-08	0	100	KID96317.1	phytanoyl-CoA dioxygenase	Metarhizium majus
Ma_TRINITY_DN4519_c0_g1	834	3.6274	0.00733	2e-144	100	KJK80574.1	hypothetical protein H634G_04813	Metarhizium anisopliae
Ma_TRINITY_DN8244_c0_g1	369	2.48394	0.004973	1.2e-43	89.34	XP_007818943.1	hypothetical protein MAA_02754	Metarhizium robertsii
Ma_TRINITY_DN119_c0_g3	462	2.47105	2.9e-12	9e-81	100	XP_007808286.1	ubiquitin	Metarhizium acridum
Ma_TRINITY_DN1009_c0_g1	2013	2.18682	0.004023	0	100	KJK79042.1	hypothetical protein H634G_05857	Metarhizium anisopliae
Ma_TRINITY_DN1401_c0_g1	378	2.08037	0.000799	1.9e-83	100	XP_007819108.1	oleate-induced peroxisomal protein	Metarhizium robertsii
Ma_TRINITY_DN2058_c0_g1	1140	1.79929	0.033133	0	100	KJK80328.1	hypothetical protein H634G_04567	Metarhizium anisopliae
Ma_TRINITY_DN1697_c0_g1	507	1.65808	0.004339				---NA---
Ma_TRINITY_DN181_c0_g1	1128	1.4303	1.54e-05	0	100	XP_007811563.1	Actin, gamma	Metarhizium acridum
